# Supplementary material for: An extended KASP-SNP resource for molecular breeding in Chinese cabbage(Brassica rapa L. ssp. pekinensis)
Source: PLoS One. 2020 Oct 2;15(10):e0240042. doi: 10.1371/journal.pone.0240042 (PMC7531813; doi:10.1371/journal.pone.0240042)
Supplement: S1 Appendix — (FASTA) [file pone.0240042.s001.fasta]

>A01_5442
ACCGGCCATAAAGCTTGCCCAAGCGGGAGC[T/C]GAGTAAGCTAGAAGCGTTGATGATATATCC
>A01_5512
TATACCATAAGGAGGACTGGAGGAGGGATG[G/A]CATGAGCTGAATGAATGTAAAAGAATAAGA
>A01_6111
GCTTTTGTCCCCTAAATTTGTATTTCTTGT[A/G]CTTTGTCAGTAATGCTTACTGTATGCCATT
>A01_6239
AATTCGTTTCTGCAGCTGCCTGATCAACCG[C/T]TGTAGCCATTGTTGTAGCAGAACAGCTTTC
>A01_6375
TCCCCTTACTCCATCAGAATTCCGCAGAGC[A/C]TAGAGATTGAAAGCATTACAAGTAGTGAGA
>A01_6793
CTTAAAACCATATATACAATAAATGATACA[G/A]CACTTGGATACAAGCCAGGATGCTTACACT
>A01_6994
TAAGATGCAGCAAAAAATCTGTAAAATTTG[C/G]CACAAAGAGAGCCACCAGAGTCACCGCCAA
>A01_7109
CACTATCTCAAACACCGGATTCATCATCAA[G/C]GGGAAGGTGAAGAAGAGGTTGATGCAGAGG
>A01_7149
AAGAAGAGGTTGATGCAGAGGCCAAGCTGA[G/A]CAATAGTGCTGATAAGTCCTGCCCCCAAGT
>A01_8283
TAACAGCGAATCTCTTCTACTTGCCGGTTG[A/G]GGTTTAAAAAAAAAAAACAGAAAAGAAACA
>A01_8454
CTTTATAGCTCATCTCGTGACCCACTCTTG[C/A]TTTCATATGATGCATAAGCTTTGATTATTG
>A01_8527
CAATCCCCTTCAAATACTCAGCTCTGCCCA[G/A]ATACTGCAACAAAACAAAACCACATGCGTT
>A01_8895
TGGATAGAGTAGAGAGATCCAACACTGCTA[G/C]GCTTGAAGAGGACAAGAAATTACCTCAACG
>A01_9033
ACGAATGTCGAAACCAGCTTCTGCCTCAGA[T/C]GGTTGCAGATTCATCACGAAACCCTTGGAG
>A01_9686
CCCAACGCACTTCATGTCCTGCGAACCTCT[G/A]GCATAAATGTCTCCTTGGTTGTCCATGTGA
>A01_9779
CTCGAAGGGAACCACATCGGTGTGGGAGTT[G/T]AGGAGAATGGCAGGCAGGGTTGGGTCAGAG
>A01_10527
CTCTCAAACGCATCGCTTTTGTCTGCCACT[T/G]TGAGGATCCCAAACAAACCACACCACACTG
>A01_12273
TTTGGGCATATATTTTGGTAATAAAATTTT[G/A]TAGTTTTTTCTCTGAATTAAATTATCCATA
>A01_12358
AATCCAAAAATAGTATTCATTAAATTAAGA[C/T]AAAGTAATTGAATAGATAAAAACAATAATT
>A01_12478
AATCTATACATATCTGACTAAGATACCATA[C/T]TAAAATATAGATATAATGTTGTTTTCATTC
>A01_12772
TCAAATATGATATTATAATCATCATATTGT[G/A]ACATATAAGATCACTACTCATAATTACAAA
>A01_12870
TACTTAGTATAATGTTATTTCAGATATTTT[T/A]AAATAAAAAGATAACATCTCTCTATAAATT
>A01_13215
ATCGAATGTCAATTCGTGACAGACTTTGCT[A/C]GTAGGGCATCAACACACCATCAGAATGCCT
>A01_13317
TCAACTGCACATACTGGACTGAGGTTTGGT[A/C]TATCTTCACTCGCAAGGCCCATCTCTCTCC
>A01_13790
AATCATATTGGATATAAATTTATAGAGTAA[C/T]CCACATTTTAACTAGAATGATTGAAAAAAT
>A01_14726
ACTAGAATACTTTATTTGCTTATTTCACAA[G/C]GCAATGACAAGGTTTCTAACCAACTTAGTG
>A01_15156
GATCCCAATCCCAGCTGCCATCATAAGCCC[G/A]TATAGATTGCTAATCGCAATTCGTTTTGTG
>A01_15913
ATGGCTGATGGTACCCACTGGCCAGGAACT[C/T]GGGCAGCCGCTACTCGAGAGCATTCCAAAG
>A01_16335
TGATAGATATGCTAACAATAACACTGTATT[T/C]TTTGATGGTAATATGCGTGCCCTCGATGGT
>A01_21076
TTTACACACGTTGTATCATAATAATATTCC[C/T]TTTTCTTCTTTTGTTGGAGTTGAAAGAAAA
>A01_22233
CACCGGCATGGCTGCAGGGCAGTACGTTGA[T/C]CTCGAAGGAGGCCCCTTTCCTATTTCCTTT
>A01_22386
CAGATTGTACGGCAGAGCTGTTGGGATGCT[G/C]TATCAGGTGGTGGATGACATCAGAGACGAC
>A01_22622
ACTTCCTCCTTCATGTCTGAATATTGATGG[G/C]CCTGTTTTCTTTGCGTTTTGGGCTTTATCT
>A01_22830
TGATCTATTTGTTAATGAAAGAATTAGCAT[A/G]TGGTGTGTTTTGGAGTTTGTAGTCCATATT
>A01_25489
TAATACGAACTCTTTTGATACTCTTTTGAT[A/G]CAATGAATCCGGTATACAATAAAATGGATC
>A01_26126
GCATCTTATTACCCTCGGTCAACTCCTTCC[G/C]TATTTATCACCAACATGACCTATTTTTTTT
>A01_26562
GCTTCGAATTATTTGATGGAAAATATGGAA[T/A]GCATTAATATAAGAGACCATATAGACATTT
>A01_26645
TGAGCAGCCATGGACGTGTATTATTTAATT[A/T]TATATGTATTTATAGTCTATTACACCACAA
>A01_26735
ACGTGAAGAAAAAAAAATACTAAGAATATA[C/G]ATATACCATTATATAGTGTTCCCGTAATTT
>A01_28797
TACCTTCTCTTGTTTCCCCTCTCCTTTTTC[T/C]TTCTCTATTGCAAGTTGTTCTTTCATTTTA
>A01_31675
GGGATGATGATCAGGGTCAGCTTGGAGGAT[C/T]TGCTTGAGATGTTTCCACCTTCCTCGAGAC
>A01_32450
AGCGGTGATAATAAGAGAACACACTGCAAT[G/T]ACCAATCTCTTCAGCTGCCTGTGGTTCAAC
>A01_32641
CTCTAAGATCGAGTGGGTCAAGAGTGTCAA[G/C]GAACTCAAAGGGAAAGGAGAGTGTTTGAAG
>A01_34935
GTTCTTGATAAAACTATTCACTAAAACAAT[A/G]TTGTCCCTCTCTCTCTCTCTCTTATCTCTC
>A01_35086
GCATAGGTGGATCCTTAATCACCTTTGGCT[A/G]GTTTATGTCTCCAACGACGGTTCTTTCTAT
>A01_35149
GAAAGCCGTTGGTTTTTGACTCCGGCGACA[T/C]ATCAGAGACTCCTGTGTAATTGTCGGCTTT
>A01_35240
AGATAGCGGCTTCTCTCCGGTTTTTTTTCT[T/A]GATCTAGTTGTTTTTTGCTTCCTGCTTCTC
>A01_35450
TCATGGTCGAATAATATATCAATCTGACGG[C/T]AATTCAGAGACCGTCAACCATTCAGAAGCA
>A01_35598
TGGTCAAGTCTTTCTTGTTTTTATAAGTTG[T/C]TAATTTCTATGTTTGACTAGTCTTTTATAT
>A01_36065
TCCCCTTAGTCCGGCTGAGTGATCCTTTCC[G/C]TAATTTAGGGCATATAATTCGGACTTCCAT
>A01_36103
GGGCATATAATTCGGACTTCCATCTATCTT[T/C]AAAGATGTCTGTCACTACTTTTAGGAAAAT
>A01_36217
TTCGTGTCTCCATCCTTTGGCGTTTTATGT[G/T]GCTCTGGTGTTAAGGTTTGCTCTCGACTTG
>A01_36365
TCTCGTTGACGTCCTGTTTCCGGTGTGTCC[G/A]GTGGATCAACGGCGAGTTGTTCCGGCAATG
>A01_36869
AAACTTCATTCCCTAAATCAGTGGATAAAC[C/T]ACAATAAAATCACTATTCTAGAGAAACAGA
>A01_37218
TGTTTCTCAAAATCTATGCGTTAACCCCTA[C/T]AAAATATTTAGTATTTCGGTGAACGGTTAA
>A01_37563
AAATTATTCTCAAAATCTATGTGTTAACCC[T/C]TACAAAATATTCACTTTTATGGTAAATAGT
>A01_37722
GAGCATCGTTTTATTTTTTTAATCAATTAA[T/C]TTAATAAAACTTCATATGCTCTCTAAATGA
>A01_37762
CTTCATATGCTCTCTAAATGAGAGGACAAA[C/A]CCAATAAAATCGCTATTCTAGAGAAACGGA
>A01_37859
ATGTTAGTTCATGATAAAACTATGCATTAA[A/T]ACAATATTTCATTTTTTTGATTTTCTTAAA
>A01_37990
TCTTTAGTGCAGTTTTAAAATTTTTAACCA[T/C]ATTCTAAATTTGTATTAATGTATTATAAAC
>A01_38191
ATAACCATCATCATATGTTAGTTCATGATA[A/C]AAATATTCATTAAAACAATATTTTCCTTTT
>A01_38250
TTTTATTTTTTCTCAAAATTTGTGTGTTAA[C/T]CCCTACAAAATATTCAATTTGTTCGGTAAA
>A01_38293
TTCAATTTGTTCGGTAAATGGTTAATATAC[C/T]GAAGCCTATAATTTTTAGTGTTGTTTTAAA
>A01_38525
TCCAAACCTTTCTAACCATCATCATATGTT[G/A]GTTCATGATACAAATATGCATTAAAACAAT
>A01_38722
TTGTATTAATGTATTCTAAACTCAATTTCA[C/T]GGTACATGGGCATCGTTCTACTTTTTTTAT
>A01_38830
CCCCAACAAAATCGCTATTCTAGATAAATA[G/T]AGAAAACAAAGGTTCCAAACCTCTCTAACA
>A01_39055
TCTAACCACATTCAACATTTGTATTAATTT[G/A]TTCTAAACTCTATTTCATGGTACATGGACA
>A01_39258
TCCCTAAAACAATATTTTTATATTTTTCAA[A/T]TTTTCTCAAAATTTGGGTGTTAACCCCTAC
>A01_39561
ACCTCTCTAACCATCATCATATGTTTGTTC[G/A]TGATACAAATATTCCTTAAAATAATATTTT
>A01_39707
ATATAATCTTTAGTATTGTTTTAAAATTTC[T/C]AACCACATTCAACATTTGTATTAATTTATT
>A01_39903
TCCAAACCTCTCTAAACATCATAATATGTT[A/C]GTTCATGATACAAATATGCATTAAAACAAT
>A01_39956
AAAACAATATTTTCATTATTTTGAATTTTT[T/C]TCAAAATTTGTGTGTAAACCCCTACAAAAT
>A01_40321
TTGGAATATTTCTCAAAATTTGTGTGTTAA[C/T]CTCAACAAAAAATTCAATTTTTCGGTAAAT
>A01_40671
CTCAAAACTTGTGTGTTAACCCCTATAAAA[C/T]ATTCAATTTTTCGGTAAATGGTTAATATAC
>A01_41143
TTTTAAAATTTCTAACCACATTATACATTT[A/G]CATTTATGTATTTTAAACTTTACTGCATGG
>A01_41475
TATTGTTTTAAATTTTCTAAACACATTCTA[C/T]ATTTGTATTCTAAATTTTATTTCATGGTAC
>A01_41629
CTAGAGAAACGGAGACAACAAAGGTTCCAA[C/A]CTTTTCTAACCATCATCATATGTTAGTTCA
>A01_41834
AACCACATTCTACATTTGGATTAATGTATT[A/C]CAAACTCTATTTCATGGTACATTGGCATTG
>A01_42779
GTACTCTAAATTCTCTATCATGGTACATGG[A/G]CATCGTTCTAATTATTTATCAATTAATTTA
>A01_42810
CATCGTTCTAATTATTTATCAATTAATTTA[G/A]TAATACTTCATATAATCTCTAAATCAGGGG
>A01_43810
TTATCCCGCTTTTCATTATTATTATGTTCT[C/T]ATGTAAACTTAAGAATAATATACGATGGAA
>A01_43961
AAAATGGAATGCTGCATAAAAAGAGATAGT[A/G]AATAAATGCTGCATAAATTCTATTGATATG
>A01_45735
CACCTTACGCTTTACTTTACTCAGGCTGAT[A/G]CCGGACTGACTACGGTTCGTCAACATGGAG
>A01_45776
TACGGTTCGTCAACATGGAGGTGTTAAGAA[G/T]ATTGAGTCAATACCACTGTCGGAGCTGAAT
>A01_48028
TAAATTTTACATCAGAAAACATAAAGTTAT[C/A]GCTCATTCAAATCATCCCCAAAGACTATAA
>A01_48097
AGCATATCAAAAGCTTTGGAACATATGCTA[C/A]TGTATAAGGATATATATATATTCTTACAAA
>A01_49064
TCATGGAGTGTAAACCCCCTTTGAGTAATG[T/C]AAGTCTGTTTGTTCAAAAAAAAAAATACTT
>A01_49724
CAATTGAAAAAATAAATAAATAAATCCGCG[T/C]TTTGAAAGCGCGGATCAAAATCTAGTTCTT
>A01_49960
CAAGGTGGTGAGTGGTTCAAACATGATATT[C/T]TTACCAGACAAAAAAATCATTCCGATATCA
>A01_50020
AAAATCCAATTCAGAATATAAAAAGGAGCG[G/A]GGACGAACCAGCAGGGGTTCCATTGGCAGC
>A01_50408
CTCAAAGTCACAAAAATATGTTTCATTAAA[A/G]AGGTAAATATACACTTATACCCCTTGGATT
>A01_50473
AATCTAAATCTTAGGGTTTAGAGTTAAGGG[A/G]TGGGGTTTTGGAATTAGAGTTTAAAATTTT
>A01_50669
TCTGAAACTATAAAAAAAATTCTTTTTTTC[C/A]TTTTTTTATTTTTATTTTATTTGTTTTTAC
>A01_50814
TCTTCTAGTGTCATTTTTTAGACAAAAAAT[C/T]AAAATGTGCTATTATTGACAATTGCCCTTT
>A01_54867
ACAGGAGGTGGGTGCTCTATCTTCGGCGAT[A/T]TAGGAGGACAAGACTTCTTAGGAGCCGGTG
>A01_55055
TAAAGGGAAATGTGTTCAAATCCCTTAAAA[T/G]GAGGGAACTTAGGCATAGGCCAAAAGAATT
>A01_56548
GCAGTGTTTTCGGACGGCAGCTTGTTCTCC[A/G]GCTTCCGTCTGGAGTAGTATAAGTTTTTCT
>A01_57796
GCATTGTTTGAAGATAACGTTTTATTTTGG[T/C]TAGACAAGTTTCAGTTCATAAATTAACACC
>A01_58100
AATCAGTGATAGAGATGGTTCTTTAGGTTC[A/C]CATCTTCAAGTCCCTACATAATCTATAGAG
>A01_58208
TTATCATGTAGGACATCATATCGTAAATAT[T/A]GAAATAACACTTTCTATAAAGTATAAACAT
>A01_58517
TCTTTGTAATGGTTTCTTTGTCCCCATTAA[G/T]TAAATTATGATCCTTCTTTTTCGCCCTTTT
>A01_58938
CGTACAAGAAAAACTAGCCAGTCTGAGCTC[A/G]CAATATTATGTCTCTTTTGGATCCAAGTTT
>A01_59393
CTAAATAAATCTGTCCGTAATAAAAAGAAA[G/T]GTGTAAAAATGGAAAGCTGTACAAAAGAGG
>A01_59734
GTGGTTGATAAGAGAGAAAACATGATTCCA[T/A]ATTATTCTTATTCACCTGTTGGTTGATGTG
>A01_59774
ATTCACCTGTTGGTTGATGTGATTGATTTC[G/C]GATGTAACCCGCAAGAATAATCAACTCGAG
>A01_60119
CACAAGTTACAAAGATGGGAAGCTCGAGAT[T/C]GTGAGACTTTTACATGTTCTTTTGTCCCTA
>A01_60602
TCGGTTCTTAGCTTTTTAGTTAAAAGTTAA[T/G]AGACGGTTTCTTATATTCCGTTAAGAACCA
>A01_60646
TATTCCGTTAAGAACCACAACCTAAGAACA[C/T]CCATTAATCATGTTTTAAAGTCCTAAGAGC
>A01_65291
ATTAATGGAAAACATATAATATGTACTTAA[C/T]TGTGGTACATATTTACATACCTATTCGTAC
>A01_65919
AAAAATAATAGTAATATTGCTTTAGCATTC[T/C]ATCCTCATCCTCCTCCATAAATAACCCCTT
>A01_66382
ACATCCATGATCCGATAAGACGCAGAGAGA[A/G]TTTTACATTATGATCAAGACTAAGATTCTT
>A01_66553
AATCTCCATCGGGTTTTAATTAGTTCATTA[A/G]TTCCCCCTAATGGGGTTAGTATTCGATGGA
>A01_66643
ATAAGTGGTGGTTTGCGCTAATAGATGATT[T/A]CCGCAAGTTGTATTGGCCATTTTTTTTTAA
>A01_68728
TTTGATAAATTTAGTTTTAATAAGACATCA[C/A]AAGCAAGCATATTCATCATAAAATATGTAA
>A01_69077
TTTGTGACTAAATTCAAAACAAGTGTTTAT[G/A]TTTCTTCAATACAAATAGAACCCAAGCTTG
>A01_69385
TATTTTATATAATTATTATTCTAATAATTT[G/A]TTTTATATAATCATTATTCTAATAATTTAT
>A01_69448
TTAATGATAGACAAAATAAAATAAAACAAA[T/A]TTTTGAAACAAATATTAATATAATTTTATT
>A01_70710
ATATTTAAAGAAACTAATTATTTACCCGTA[T/C]GTAGTACGGGGCCACATACTAGTATATATA
>A01_71489
AGGCGTCGGATTAGTGTCGGAAGTGTTCAC[T/G]GAGTCGAAACTAAACACTCTTCCTGGCGAT
>A01_71814
CGAGGTGCTTTCTCGATGGTTTTCGTCTTT[G/C]AAGACAAGCTTGTCGCTGTCCGAGACCCGT
>A01_73233
GTAAGAAGGCGGACGCCAGTTGATTTGCTG[C/A]GGGATCACATCCAGCAGACCTACAGGTATG
>A01_73540
AAATATCCAAGGCTGCAAAGATTAAAAAAA[C/A]CCTATTCAGACATGCTATAGTATGATTTAC
>A01_73723
CATCTCCATTTCCTATAACTTGTAGGTTAG[A/G]GGAAGCGTTTTTGGTACACTGGTATATATA
>A01_73836
GTCACTGCAGTGGCTCCCCAATCCCCAATA[T/C]CTGAAATTAACGAGTCTATCCGGTTCTTAC
>A01_74953
CTAGAGGTTTTTCTGCGTCATTCTCTTGAG[G/C]GACATTGCTTTTTTTGGCATGGCCCTAGAA
>A01_75624
AATAAGCTTGGAAAAAAATGGACATACCTC[C/G]CGGCGTTCTCTTTTGAGCTGTCGTTTCGAT
>A01_76278
AGTTGATATGCAACTCCAATCCTTTGATCC[A/C]GCCAACACCTCAACACCCGGTCTACTTGTC
>A01_76632
TTGCATTAACAAGAACTATGGACAATAAAA[A/T]TAAGAATGGAACTAAACAAGCTTCATTCTT
>A01_76713
AAATATTAAAACGAAAAGAGAGATAGAAAA[G/A]AAAAAAAGAGAAAACATACTTTGCCTACAT
>A01_77413
TAAAGCTTCCTGCTTGGCAGCCAGGGCGTC[G/A]TCTCTTTCCTTGAGGGCAGCGTCTCTCTCG
>A01_78949
AGCATAGGGATGCTTTTTCTCCAGCTACGC[C/G]ATCTCTGAGCTGTCAAGAAGGAAGGAGGGG
>A01_78990
TGTCAAGAAGGAAGGAGGGGTGAAGGCCAG[T/A]CCAAACATCTCCTTCATGCCTCTCCCTTGC
>A01_79227
CAGCTTGCTCAGCATCATTCTCTCCCCGTG[A/C]AGCGCCTTCCGGCTTTTACCAACCCCACGA
>A01_79327
AAAAGAACGTGTATCCAACCTTGAAGCCAG[A/T]GTTAAGGTTTCTCCTCCTTCCAAAGTTTGG
>A01_79579
CAGACCAATATCCCTCCCCATTTTACCAGA[A/T]TCATCATCACCAATCGACACCTGATTGAAA
>A01_79834
CACACTAGAACCCAACTCTAAACCAGAAAA[T/C]ACTATCTTCTTGTGACTCTCTTCTTCTGGT
>A01_80337
ATCTTCAAGCCGGGATTGAGCAAGATCTCT[G/C]TCTTCTCTCAACTCTGCCATCTCCTTTTCC
>A01_80787
TGTGCCCTTGCCTTCCCTTACTATATAGAT[C/A]GATCACCCAGTGCTTAGACAATTAAAGTTA
>A01_80899
AAGAGTAAGCAAACTTCGGTTGATATGGCA[G/C]CCTTCCTTGAGCCTCGCACCAGCTGACATC
>A01_81033
AACATTAACACCCCAGGATCCAACATAAAA[T/G]AAAGGGTTGTTGATGAGAGAGCATACCACA
>A01_81170
TCAAAAGCCAAAGCTAAGTAAAAGAGAATC[A/T]TGGTATCTTAAATACAGTGATAGATAAAGA
>A01_81215
CAGTGATAGATAAAGAGTTTTAACCAGTCT[A/G]ATAATCTGATGAGATCTGGAACTTCTCTCA
>A01_81291
CCAATCTTACGTTGTGCTGCCAAAAATTAT[T/A]GAGACATTTAAGTTACAACATTAATCTGAA
>A01_83039
AGTTTAGTGTAACAAACAAAACAGAACGCA[G/T]AAGGTAAGTGAGAGTTGTCTTCTTCTTACA
>A01_83476
CGTTGGGCTTATATTCAGCGAGCCTACTTC[C/T]TGAAATGAATGGATATTTATTGGGCTTTAC
>A01_83560
TATATGTAGCCCAATTAGTCTTTCATTATG[A/T]CATTGTGTCTGCATGCATGCATGTGGAATT
>A01_84592
CTGAGCAAGGTAAAAGAAAACCTCAGCCCA[A/G]ACCTTCTCAGCAACTTCGTAAGTCCTGTCA
>A01_84820
GTATCGGGCAAGGCCCCAAGCAGCTTCTTT[A/T]ACAGCTAGAGCAGACGGACCATTGGGAATG
>A01_85233
GAGGACGTCGACCATTTTCTTGCCTTCGGT[T/G]GTCGACTGATACAGAGTCTCCTCGAACAGG
>A01_85517
CTAACTTTTATCTATGAATATGAGCTCTTA[T/C]ATTAACAAACATGAACTAAAATCAACCCAA
>A01_85712
AGTAAAAGAAGTAAAAAACCTTTATGTATC[C/A]TGCAGATAAGACACGTGACAAAGAAGAGGA
>A01_85931
GTCCAACACAGGAGATGCCTTGAGGAGTGA[T/G]GTTGATGCCATCTTTTGTTAAATGTTATCT
>A01_86156
CTTGTGACCTTGCCAATTACACTCCGCCAC[G/T]TGGAACGTAATCTTGTATCACTCACAATTC
>A01_86254
GCCATGCCATCATTTACATGTTTGCTTCTT[C/A]TTTTATTGCTTATACGGGAATTACAAGTAC
>A01_89164
AGCTTACCGCGTCTCTTCACAATCATCTCA[C/G]GTACCACGTGTAACATATACAGTGGAGGTT
>A01_89195
GTACCACGTGTAACATATACAGTGGAGGTT[T/C]TTCGGATTAATTCGACTAGAGGTTTTCGGG
>A01_89319
AGAAAAACGAGCGGAGTCAAGAAAACCAGT[A/G]ACTACTAAGAATCAATTTTCGAGTTTAGAG
>A01_89492
ATTTGTATCCCCAAGACATTTTCAAGATTT[A/C]TATAAAATGGTTTATTGTTATAACTTTATA
>A01_89956
GATGGGCCTATCTAAAGCATATATACACAA[C/T]AACAAATGATGTTTGAGTACCTGTCGTTTA
>A01_91074
CAAGCTAGGACAAACCAATCAGTGGAAATT[A/G]ATTGCTTCTTCTCAGAGATGATATACAATT
>A01_91126
TATACAATTTGATTCTCTCATCATCATCAA[G/C]ATACCTTGAAGTTCTATGATTTCCTTTCTA
>A01_91169
TCTATGATTTCCTTTCTACTATATTATAAC[C/T]ATATTATATAATGTTTACAAATCTTGATAA
>A01_91209
AATGTTTACAAATCTTGATAAGTGCAAATT[T/A]ATATTAACTACACACTCGTATACCCATTCA
>A01_91323
CAACGCACGACAAAATGGTGAAAAACAAAT[A/T]CTTGATAACGATGTTGGTGTGTACTGGTGA
>A01_91545
TAATCAGTAGCCCACTTGATATTTACGAGG[G/T]TGTGTCTAAAATCATTGTCAGACATGTAAC
>A01_91802
AAATAGGATTGACTTATGCAGAGCATCCGA[A/G]TAGTTGTGAGGAATCACCGTTGGTACCAGG
>A01_91980
CTAGTTCAAGTATACGTATTTGGCTAATTT[C/G]GTATAATACCAATTTGCATTGGCTTGTAGT
>A01_92842
CACATATATATTTTGTTTCTTTGTAAGTTA[C/T]TAGAAATTCTTCATATGTCGATATGATGCA
>A01_93278
TTATTTATGTGGATGTATGATATACGAATA[A/G]ACTATCCATTACATTTGAAATACAGAGATG
>A01_93574
TTGCGGAAATCAGACCGGTCATCATCGTAC[T/A]TATCATCCTCTCCGGGCCCACCCACCACCG
>A01_93895
AAAGTAAGATTAATCCCTAATAATAACAAT[C/A]TAAAATTAATTAATTTTTGCAATAATCGTG
>A01_94972
ATATCAGCAAACTGAAACGTTTTTACAGCG[T/A]TTTGGAGCAACGTCTGAGAGTAGCCTGGAT
>A01_95373
ATACTAACGACCCATGAAATCAATGTTAAT[T/C]AATTCTATAATCAAATTCACTAATATATTT
>A01_95718
AAAAAGAAAAAAAACTCAATTTTGGCAAAT[A/G]TTTAATTTATGATATATTTCGTAATGAGAA
>A01_95900
TCACGATCACGGGTTTCTTTCTTTGGCAAA[T/C]CAAAACGACTCAGTTTCCCTTAGCTTAAGA
>A01_96290
ACCGGAATTCCGTCTCCACGTCAGACGCTG[G/A]TCGTTCGGGAGGTAGCCGGAGCGTTGGCCC
>A01_96578
TGCGAGTGAGTCACGAGATGTGTTTATATA[T/C]AACTTCCGATTTTTAATTAATTTATTAATA
>A01_96620
TTTAATTAATTTATTAATACACCAGTATCC[A/C]GGCTTAATTATGTAACTATTTTCTTCCTTT
>A01_96844
TATCTAAATTTGCAAGTAAACAAAACTTTT[A/T]AAAATGAAAATAATAAGGTTCATATAAGTT
>A01_97449
ATTCCATATACCGATAAATATAAAATATTA[T/C]ATATAAATATGATATAACTTATATTTTAAG
>A01_97481
TATAAATATGATATAACTTATATTTTAAGC[G/C]GAAAATACTTTTAAAATAATTTATATCTTA
>A01_98157
AAGAATCAGTATGTAAGATATATAACGTAT[G/T]GTTGTAACTAACATACTAAAATGCTTGATT
>A01_98352
GATCCGTAGACCCATACATATATACTTAGC[C/A]TCCTTGCAAAGACAACCAACTCCCTGTACT
>A01_100105
CAAAATTAAACAAACGATTACAAACATATG[T/C]CATGGTTAGGCATTACAAATTTACATTACA
>A01_100441
TTTTATAATGTCAAAAGATATCAACTTGGT[C/T]GAAACTAGCACGAGAGCAACTATCTTCCAT
>A01_100693
AATGTATAAAAAATGTCATTTTTGCCTCTA[C/T]GTATGGCTCGTTACTTTCTCAGATTAATCT
>A01_100810
TCTAACAATGTAAAAGGAAGAAGCAATAAC[G/T]GGGTCGAAGTACCCTTAATAGTTTGGATTG
>A01_100996
CCAAAGCCCACTAGCCGGTTCGACGCACAC[T/A]AATTCTCTGCTTAAACTTACTCATTTAGGA
>A01_101218
CATCTGCTCGGGCTTTAGTAGAGACCTTTA[A/G]TCTAATATTATTCAACTAAATATGATCAAT
>A01_101451
TATATCGTCTTAAAACGGTTTAATTCATTC[A/G]AAATTTATCTAAAATTGTATAAATCTATCT
>A01_101524
TTAAATAACTTTAAATTGAATAACTTAAAA[G/T]TGATTATGACTAATCTATTTATATTATTTT
>A01_101607
AAATGATGATCATTTTTTCCAATTTTTTTT[T/A]TAGTATATCTAGTTTTTTTTAACATTTCAT
>A01_101683
ATCAAACACAAAAACTAATTATATAATAAA[A/G]TTTAATTAATAAATAAATAAGTAAATAATT
>A01_101943
AAAAACAGCAAACAGTTTATACAAAACTTT[A/G]TCAAACAACACTTACTACAAATCACTCATT
>A01_101997
ACTCATTTTAGAAATATGATTCAGAAGTAT[T/A]TTTTTGAATAATTATAGTATTTTATAGGTT
>A01_102187
CCGCCTATTGCTCATAAGACTTGAAGGCGC[C/T]TTTCTTTCTTTTTTTGTCAACCCATTTTCA
>A01_102249
TATTATTATTAATAAACGTTACAAGAAGTT[T/C]TACAAGCTTTAAACTAACGACTTCTCTTTT
>A01_102449
CTTTTCTTTGTAAATTTCCTATGCCAAGGG[A/C]GAAATAAGATAAGTTGACCTTTTGGGGGCA
>A01_103175
AACACGTTGAAAATTAAACAAACAATACAA[G/C]TCTTTGTAATAGTCTTTGATTATATACGTA
>A01_103394
GTAGCAGGTATTAATAATGGAAACGCAATG[T/A]TGTTCTTTTCCGTATACATGCATGTAGATA
>A01_103503
AAGTCATATAAACTATATTAATTTTATTTT[A/G]TTTGTAATGGTTCGAGAAGAATAAATAGGG
>A01_104317
TAATAATGACAGAAAAATATGTTAGGTAAG[T/A]GTCCCATCCTACCAGTTTTAAAGCTCATTA
>A01_104616
TTCAATGGCTGAGTAAAAAATTTAACCGGT[A/T]TAATAGGACCGGGGACGGTACTATGCGATC
>A01_104713
CATCCAATATGGTCGCTACTTCTCTTGCCA[A/G]ACAGGTTAGTTATATTTGCCTGTTTCTTGT
>A01_104781
GTTTTTAAAACTACTTACCAAGGAAACATC[A/T]CTCTAACGGATTCATTTTGTGTGTGTTTCT
>A01_105804
GGCTCAGTCATTTATGCCTGAGATGTTATA[T/C]GGTGCGAACCGTAACCTTCCCAAGGCGAGA
>A01_106030
TCCTGTGTGTGTTTCGAACCTAACTTGACT[A/T]AAATTATGATTATTGGATATGTGGGCAGAT
>A01_106273
GGCGGGACGTGATCTGAAATTCGTCAGCTC[G/T]GTGATGAGTTCAAGCTTCGTTCTTGGTTGT
>A01_106306
GATGAGTTCAAGCTTCGTTCTTGGTTGTCT[T/C]ACACTAATGGTAGCCTTCCATAAACCCTAT
>A01_106630
CACGGATGTGCTGACGACTAAGAAGATCAA[A/T]TCAGTTTAAAGTCTCTCTCTCTCAATAATG
>A01_107003
TCATATATAGATTAGTGATGTGATTGTATT[T/A]TTGAAGAAAAAAACGATAAATGCATATATG
>A01_107057
ATATATGAAACAAAGAACTAGAGTTGAGAT[G/T]ATATAACAATCCGAGCTAATAATTGATAAC
>A01_107366
TGTATTTTGTCAAATTTCTTTGCATTTAGA[A/G]AAGTAAGAAAGTTATGTGTTTATGATCAAG
>A01_107681
TGTCAATCAAGAAGAATGATGAGATGAAGA[A/C]AATTGAACATATCACAATAGGAAAAAAAAT
>A01_108411
CAACCAACAAAAGAAAAAGGTTCAGGAGAA[G/C]GGCTTTTGTTCCCAAAAGCCTTGATGCTGA
>A01_108948
CAATAATGCACGCCGCTCCTGTCGTATTAT[G/A]GATAACAAGATTTTGAGTACCATTCTTTAA
>A01_110184
TTTTTCTGTTTTTTCAAATTTTTATTGTTT[A/T]AAATCATTTTTATTTTTAATTATGTGGCAA
>A01_110541
ATAGTTTCAATTGAATTTTTTGTTTAATTA[T/G]TATATCGATAAATTAATATCTCTATAAATT
>A01_110717
GGAAAACAAATGGAAATCTATAAGTTTCTC[A/C]CCAATAAAACAAGCAAAATCTCAGAATAAA
>A01_110749
CAATAAAACAAGCAAAATCTCAGAATAAAA[A/G]AATCGCCCAAACTCACGTTTTATGAAAACC
>A01_110796
GTTTTATGAAAACCAGATTTCATCAATACT[G/A]ACATGTGTATAAGCACACAATATTTTGCAA
>A01_112566
GCCAATTGCTAATCTTAAAACTTTTTTCAC[A/C]GCTTTTCAAATTAATTATGGAGGTGTATTG
>A01_112646
AATTTTTTTGATGATATAAGGTTAATTGAT[G/A]ATTTTTAATATATTTTTAATTAAATTATTT
>A01_113091
TTTGTTTTGACTTTACTGTTTGAACATATA[T/A]TTCACCAATATGACTTATAAATTGTGTAAA
>A01_113593
TTCAGCCAAAAATATACCAATCAGGTTGAT[T/A]ACTTTTACTTTTTCAGCTATTCACTGTGCA
>A01_113834
AAACTTTCTATTGGTCAACAAATACAATAA[A/G]GTTTCATTGTGAAAAAAACTTACTCGAACC
>A01_115541
CAAGTTACAGCGTTCCTATAATGAACTTAT[G/C]GAGTACAAATTGGTCCTTGAGAAGGTACAC
>A01_115859
TCCTTCTAAACAGGACAAGTCTATTGATTC[T/G]TCAAAGCAAGTAAAGCTTGGATTTCTCACT
>A01_115958
GATTCTATTCCGTGCTACTAGGGGCAACGT[C/A]TTTATTCGACAGACTGTCATTGAGGAGCCG
>A01_116132
TCTCATTTCGAAATTGACTTTCTAACTCTA[G/A]AATAAAATGCAGGCTGAGAAAAATGTTTTT
>A01_116829
TGATGTAACTAAGAAGTGCCTTGTGGCCGA[G/A]GGCTGGAGTCCTGTCTTTGCATCAAACGAA
>A01_116935
ATCGGGTGATCGTTTCAGAATACTTAAGTA[G/T]AATAAGGTTTGTTTGTGCAGATTCAAAATG
>A01_117226
ATTTAGTCTTGTCCTCGCTTCCTCTGATCA[A/G]TCTTCTATGATCACCACTTTGCAGTGTGGC
>A01_117871
TTCTCAAAATTGAGATTTATAAAAACACAA[C/A]AGAATATTAGTAGCAGGCAAATACTTTGCG
>A01_118174
ATGGTAGGTTCAATGATAATTTTTAACGTA[T/G]TGTGCTCTCTCTTTCAAATTACAACGTCTA
>A01_118238
TTGAGGGGCTTGCAGGTTCCAGTTCATTCC[C/T]CAGATGATATTCTTGAACAGCTTGTTTGGC
>A01_118656
TCATTTTTTTTTATGATCCTTTGCTGGTCT[C/T]CATAAACGGTTTCCTTCACCAGAGGCATCA
>A01_119460
AATTCTACGAAGGAGATGGTTACAAGTTCG[C/T]TCCTTTCTCTTTCATTCTTACCGCAAACGA
>A01_119721
AGACAAAACCCATTTGTTGTTGTGTTTGTG[T/C]TTGTTTGGAATTAAATAAAAATAATAATGA
>A01_120324
GATATGGATTTGCTTAAAAAAGGATGCAAT[T/G]TATTTACAAACTTCATCTTTCTTTAAAAAA
>A01_120467
TCTTGGCTTAAATTAATGAGCGGTGGTAGA[C/G]ACAGCGGCTGTAACGGTGGAGACAAGACTA
>A01_120767
AGGACCGTTTTTAACAAGGTTGGCAGCAAT[T/C]TGTTCTTCGTCGATGGAGATGACACTGAAG
>A01_121177
TTGTTCGCTAAGGCTGACGAGTTTGCCGGT[G/A]GCGAGGAAGTTAGCACCTTCAAGAGCTCCG
>A01_121262
CCGCATGATCCCTATCATAACAAGTCAAAT[T/C]TGAGATCAGACCAATACAAACTTGAAGTCA
>A01_121552
GCGCCTCGCTCGCCTCAGATTGGCTTTGAA[G/T]ACGGAGAATCTGTAATCATGCTCCTCCCCG
>A01_121685
GCGGCTCCATCAACCACCTGCCGGATCACG[G/A]CATCGTCGCCGTCGGACGATGAGGAGACGG
>A01_121772
AGGGAGAAGGAAAGCTTAAGAAGATCCATT[G/T]TGATTTGAGATTGAATGAAATGAGGGAGGA
>A01_125477
CTCAATCAATCAATGAGATAATTATTGCAG[T/G]TTTTACTTTCTGGGAAGGTTGTTTCTTAGC
>A01_125643
TAGCTTACTGAAGGAAAAAGAAAGAGAAAA[A/G]GAGAAGACATTTGCTTAATTGAAGGGAATG
>A01_125790
TACTTCCTCTCCTACAAACACTTGGTAAGA[G/T]TTTGCTACCCATACATTTTATATACATACA
>A01_125825
CTACCCATACATTTTATATACATACAATAT[A/G]ATGAATACAGATGATCAGCACCAGTGTAAC
>A01_126162
CAAAGAAGTTACCTAAACTTTAGCCTAATG[G/C]TTGGTCTAAAAAATATGTACAGACCGTAAA
>A01_126412
GTAGTATACATATCCACCCATAAATTACAA[C/T]TCATACAAAAAGAAGAAGATAAATTTGACA
>A01_126555
TCAGAAGTCATTTTTCTATTTCAATTACTG[A/T]TCATGACAAGAAATTCGTTTTGGTGCATGC
>A01_126807
TGTTACTGGCTCACCGTTCTCAGTCTCCTC[G/T]GCTTTGCCCTGAGTGAATGCTTCTTGAAGC
>A01_127086
GTTGATGGCTGGTCTTGCGCAGAGAGCTTC[A/T]AGAAGAACGACACCAAATGAATAAACATCA
>A01_127344
GCCTGTGTGCAGATAGTGAAGCCCACGTGC[A/T]GAACCGATACAGATCTCAAGTCGCTGTTTC
>A01_127380
GATACAGATCTCAAGTCGCTGTTTCCAGGT[A/T]AGGGGAGCAAGGTTCTTTCCGTATAAATGA
>A01_127499
CACAGTAACCAATCAAGGAGACCAAGTGTC[G/T]GTGTCTGAGCTTAGAAAGCATCTGGATCTC
>A01_127662
TCCAACACCGATAATCTGAGATGCTTCAAA[G/A]TTCTGCGTAGCATCCTGAAGCTCTGAAAGG
>A01_128022
CTCAACTCCATTCAAGATTGCGTTTGGAGT[G/A]CCTGTATCTTCTCCCATGGGACTAATCTGC
>A01_128119
ACAATGTCTTTGTAGTAAGGAGCTGCGAGA[C/T]CGCCGGCGACAGTAGACAAATCCAGCCCAG
>A01_128307
GTTGAAGTTCGGAGCAATGGTGTGAGAATC[T/A]GCCATTTCAGCAGCTGTTGCATAAACCGTT
>A01_128337
TGCCATTTCAGCAGCTGTTGCATAAACCGT[T/C]TGTGGAGCAATCAAAGGTGTAACTCCAGGA
>A01_128379
CAAAGGTGTAACTCCAGGAGGGTACTTGAT[T/C]GCGGAAGGGGTCGTCTTCACGTCCTTGGCC
>A01_128695
TGTGCATCCGTAATGTTGACGAGATACTCC[G/T]TCTGGAGAACAGCTTGACTATCATTGTTGT
>A01_129993
CTCCGATAGCTTCTTCAGACTCTTCTAACA[A/G]CAAACCCTCTGGAACAATCCAAGGCTTTGC
>A01_133013
CTCAGAGCCATCGTTACGGCTAATACCATC[A/G]GATAACCAAGTGAGAGAGGAGGAGTCTTCA
>A01_133046
TAACCAAGTGAGAGAGGAGGAGTCTTCACC[G/A]GCAACACGTCCTCCTCTATTATGATTATCC
>A01_133101
TTATCCCAGCGGAAACTCCAAGTAGGAGAA[G/T]GCCTCCTCTCAGTCTCATTAGGAGGCACGA
>A01_133321
AAGCAGAGCCCCATTTGTAAGATCTCTGAG[C/T]CATCGATCTATCCTAGAAAAGGAATCATAT
>A01_136525
TTACGAATGTTCGTGGAGCACAAAAACGAG[G/C]AAGAGATTGGGATTGATCTGCAAATAGAAG
>A01_139313
TACCAAAAGGTTCTTCTGAATTTTAAAGTC[G/T]TTGCAGGAAATGAAGTTGGGGGATCAAACT
>A01_139368
CAAACTTTATTGTTGATTGTCAACTATGAT[C/T]TTTTTTGGCCATTTATTTCAAGCTACATCA
>A01_140420
TTTGTGAACAAACGCAGAGTTACTTTTTTC[T/G]GACAAAGCAATCAAGAACTCTGTTCAACAA
>A01_140637
TTTGGGTACTTTCAAACTGTTTTGGAGAGA[G/A]ATTATTGGCCAATTTGTTACTTCAAAATTT
>A01_140952
AATGATGAGCATCTTAAATCAAAAGGACTG[T/C]CGAATAACACTTATAATTTAAAAACATAAG
>A01_141070
ACGGTGAAAATAGAGAAATCAAGAGAAGCT[A/T]ATCAATTAGAGAACAAGATGCGATTTAACA
>A01_141836
TAACAGAGTAATCGAATCAAGTAACAGAGA[A/T]ACACAGATCGGAATCAGATCCGCCGAGGAT
>A01_142871
GTCTGCTTTGGGAAGCGTTGAAACGATGAT[C/A]CCACTTCATAGTGCGGTTGCTTCAGCTCGG
>A01_143415
GACTTTAGATAGGAATATATGGTTGGTCTT[A/G]GATTCTTACTTGCTTGTGTTATGTCTTAAA
>A01_143676
TTTTGTCCCATGTATGGTTATGGTTCACAA[G/T]GACTTGTTCCTTCAAAGTTTTACTAATCTT
>A01_143866
TCTTATCGTCTCTTTAGAGCTGGGAGTTCC[T/G]CGGTGACACCATCATTAGCATTGGTCTTAA
>A01_144174
AAACCCTACCAACCAATAATTGTGAATCCA[A/G]ACATTCTTGCAGTCTACTCCTAAACCCATT
>A01_144305
TACACTACTGGGTTACTAGAGAATTACACT[T/A]GACAAACTGACAAATCGTCCAACGCCAATC
>A01_144377
TTCATTAAATTACCAACAGGCTGGAAAAAA[A/T]GTTAAAGCTGTAGCAAAAAAAAGTAAACTA
>A01_145081
GGTAACTACAGATCTGAAAACAGCTTTGTC[C/T]GAGGCAAAATCTCCACCCAAAGAGATCAAA
>A01_145483
GTCTTGATAGCAAACGCTTGTTTTGAACTT[A/T]TGGTTACCTAAAAAACACAAACGCTGGTGA
>A01_145642
GTTTCTTCTTAAACAAGTCACCTAATTTGT[A/C]AGAGAACCTTTCTCTGTTTTTCCTTTTCAT
>A01_145748
AAAAAAAATCTTGATCGATCTTTGATCTGA[T/G]ATTCAATGCATGAAAAAGAGTTCAAGGGCT
>A01_145834
GATTTGGTAAATACAAAGAAACTTGAAACA[C/T]AAAAATCATTGCAGTGAGGCTAATATTAGA
>A01_145951
TGGGAGAAGCAGCTGGAGAAGAGCCGCTAG[T/A]GTTTGGATCATGGCAAAAGCCACGGAGGAC
>A01_146269
TTTGGAGAAGGATGACGCCGAGAAGTGCGA[C/A]GGTGGCGAAGAGGAAAGTGGTGTTTGAAGC
>A01_146369
TCGTGTTGTGTGATCACATTGGCTAGAGAT[A/G]GCTCGAATTTATACTGATTTTTTTGGGTTA
>A01_146602
GAATCAAGAAGATTACATGTTACTGCTCTA[A/T]CAACCAAAGTGGCTGTAGTTTAGTGGTGAG
>A01_147079
TTGTTAATAAATACAAATAATCAAAGTAAC[G/A]AATAGGTAACTGATGTAAGTTTCCGTCGGT
>A01_147430
ATACGATGAACTAATCAAACGAGAATAAAA[A/T]TTGTATAAACACATGAATGGACGTACAGCC
>A01_147546
CATGTACGTCGTATATCTTTTAAAACACAC[G/T]TAACAACTTATCCAATCGATTAAATTAGCC
>A01_147742
GTTTTTTAAGGGGGAAAGGTCCACAAAAAA[C/T]ACCAAAACTGAGGGTAGAAGTAGCTAAATA
>A01_147838
ATCCCACTGATACGTGGCGGTCCGTGGTTG[G/A]TTCATTTTTATTTTTATTTTTCTAAATTAG
>A01_147990
GTAAACTAACAACTGTACATAGGACTATAG[A/C]TTATAGCTAGGAGCCTAGGAGTGACGGCAC
>A01_148048
CACTGAGCGTATTTTATATCTAGTTGACTT[G/C]TGACCATCGTATATTTAATATATATTTGGA
>A01_148371
CCCCACTAGAATTCAAAAATAAGACTGACT[A/C]TCTATACATTTGGGTATATACTTTGTTCAC
>A01_148490
TGAACATTCTGCTTGTGTAGTTTACAAATT[A/G]CATGTTCTGTCGGCTGATTGTATAGTTAAG
>A01_148889
ATAAATGATCCAATAATCCGCAAAGTAATT[C/A]TAATCGTCCAATCATATATCTTTTGAAAGT
>A01_149762
TTTTTAATTTTGTTTTTGTATAAAAAGGGT[G/A]AATGATCTCAATTTTGCTGTCCACATTTCA
>A01_149838
GTCTGAATCCCTCTCTCTCTTTTGGTTCTC[A/T]GTCTGTAAAATTCTTTAGAAACAGTGAACA
>A01_149967
AGTGTCCTCATCTTCTTTCTTTCTTTTTTT[T/G]GGTTTAAAAAAATGTTGTATTAAAAGTATA
>A01_150573
TTTTACTTGAGAAGTTTGATGTTGTCAAGA[T/C]TGATTTTTTTTTAAAAAAATCTTTGTGGAT
>A01_151008
TACGGTGATGAGGTGAGGAATTATCCAAAA[G/T]GGTTTTGTTGATTATGTTTTTTTTATTAAA
>A01_151130
TATCCTCCCTCCTTCGACTGGATATGGGAA[T/C]CGAGTCCATCCTGCACCGTTTACAGATTCT
>A01_151558
CAGCCTCTGTCAAGAAAGCTACCCATTCGT[G/T]CAAGCAGAATAAATCCTTACAGGATGTTGA
>A01_151887
CGTTAGGTACGAGAAGGAAGGAAAACCTTC[G/A]GGATTAGCACCTGTTGATGTGTTTGTGAGT
>A01_151929
TGTTGATGTGTTTGTGAGTACGGTGGATCC[G/T]TTGAAAGAACCACCGTTGATTACAGCAAAC
>A01_152355
TGCATTGGTTGCTACAGCTCAGAAAGTGCC[T/C]GAGGAAGGTTGGACTATGCAAGATGGTACT
>A01_152741
TTTCGAAAAATGACAGGTGTTCTTGGGACA[C/T]AGTGGAGTTCGTGATACAGATGGGAATGAG
>A01_152837
GCCTGGTTTTGATCACCATAAGAAAGCTGG[A/T]GCTATGAACTCTTTGGTATGCATCAATATG
>A01_153305
GACAGGTTGTGTCTTTAGAAGACAAGCGCT[G/A]TATGGTTTTGATGCACCGAAAAAGAAGAAA
>A01_153350
ACCGAAAAAGAAGAAACCACCAGGAAAAAC[A/C]TGCAACTGTTGGCCTAAATGGTGTTGTTTG
>A01_153633
AACGTTGAGAAGAGATCTGAAGCAAACCAA[C/A]TGAAACTGGAGAAGAAGTTTGGACAATCTC
>A01_153773
CATTCAAGTCATTAGCTGCGGATACGAAGA[T/C]AAAACCGAATGGGGCAAAGAGGTTAAAATA
>A01_153809
CGAATGGGGCAAAGAGGTTAAAATAAAACT[A/C]ATTACATAAGTTTTTTTCAGACATTTAAGA
>A01_153986
TATGCCAAAGCGTCCAGCCTTCAAAGGATC[A/T]GCTCCAATTAACTTGTCTGATCGTCTTCAT
>A01_154196
CGTCTACTGCTCTCTCCCGGCTGTCTGTCT[A/T]CTCACCGGAAAATTCATCGTCCCCGAGATT
>A01_154238
ATTCATCGTCCCCGAGATTAGCAACTACGC[A/G]GGGATCCTCTTCATGCTCATGTTCTTGTCC
>A01_157637
TACCGCATGTATCGAATCGAATGGCTGCGA[T/C]GCTACCGCATGTCACAGAACGTATGAGATG
>A01_158059
TTTGTTCTTCATAGTTTATTAAGTTTTCCC[C/T]TTTTTTCTTTTCTTATATAAAAGACGACAA
>A01_158090
TTTTTTCTTTTCTTATATAAAAGACGACAA[C/T]ACAATACCAGACAAAACAAAACAACAACGA
>A01_158294
TTGAGCTGTAGCAGCGGTACAGGCTTGAGC[G/T]TTAGCGGTTGTGAAGGCGGAGGAGGCAATA
>A01_158471
ATAATAAGGAGGAGGTATAAGAAGAAAAAG[T/C]TTCGGTCTCTTGCGAGTCTTTACAGGGCAA
>A01_158584
TTACGTTGTAATGACCTTGTTTAAAAGCGT[T/G]TGTCGTTTGAATATTAATTATTATTATTAT
>A01_158663
ATCTAATATAATCCATTAACTAGCGCTGAA[T/C]CTGTATAGAAGGTGCTGGAAGAAAGAAAGA
>A01_161870
CAATTTCAAAAATCATATTCATAGTCAAGG[C/T]TTTTGTTTTTATATGATTTATTCAATAGGA
>A01_161956
TTTTTTCAATGATCAATCAATCCATGGTTT[A/C]TTTTGTCGACCAAACATAGTTTAGCTGACT
>A01_162010
GCTGACTAAAGCTTGTGCTCCAATATGTTT[T/C]ATCACAAAGCACCCACTCTATTATATATCC
>A01_162198
ACATAACCATGAAAAGGAAAACAGTTCACG[C/T]GAAAAGCAAAGAATAACGACAATAAGACTG
>A01_162252
AAGACTGAGATACTTAACGGAGCAACGCAA[T/A]TTTTATCATACAAAAATTGTAGCAGTAGTG
>A01_162738
AAGTTATTTAACTTTTTTTTTTGTTAAGGT[A/G]TGTAATTCATAAGTAAATAAACTGAGGCAT
>A01_163454
TTTTGATTTGTTTGCAGAGATCTAAATAAA[G/T]AAAGAGATGGGTGGAACAAGCAAGACGGAT
>A01_163715
TACGACGTTAACCGGTTTGCACTTCGGAAC[C/A]ACCACACTGCTGACTACTTTCTTGACGTGG
>A01_163800
CTTCCCTGGCCCGATCTTCTCAAGTTCGTT[T/C]TGTTCGCTAACTTCTCTATCGTTGGCATGA
>A01_164930
TTTAATCCTTTTTTGGCCTTTGCATATTGA[T/A]TTTTTTGCTTAATTCTCCCAAAAGAAACAT
>A01_165044
TCTTTTGTAACGTGAATATTTTTTTTTGTT[T/C]AATGAATTTTCGTACGAATAAAATCCATGC
>A01_165466
ATTCCCGTTAATGGATGGAAGCCCACACGA[A/C]TTTTCTCCTTTTCCTACTAAATGAGAAGAA
>A01_165605
ATAGGTAACTAAATTCAGTACTTAGGGCAT[C/T]TCCATCCCTATTTTATTTTTTCCTTTAAAA
>A01_165706
AACTTCATATCTCACTCCATAATGAAATTT[A/T]CTCCATAAATGGAGTAATCTACTTTTTGTT
>A01_166528
TTTCATGGTGAGTCTTTGTAGTTGTACAAT[G/A]GTAAAATACAAATTTGCTATTTAAAAACTT
>A01_166925
CAATATTGTAATTGTGCTTGTACGGCGAAT[C/T]TCATTATAAGTTATGTATCATAATGATTGA
>A01_167167
TATTATATGGTTCACCAATACTCACGCATT[T/G]TTCATGGTTTGTTTTACTTAAATTATATGT
>A01_167617
TAGATATTTCTTTAACAAAAAAGGAAAAAA[A/G]GTTCAGAGGCATTTGATTTCTCGAATTCTA
>A01_167775
AACATTATAATTAATCACTATACTGTTTTC[T/G]GGAGATTAATACAATTAGATAATTTACATC
>A01_167964
TTTATTTTATATTATTGGACGCAAGTCATC[A/G]TAGTTATATTTTTGTATAAGCTATAGGTTA
>A01_168008
GTATAAGCTATAGGTTAAAGTTTCTTTTTA[A/G]GCTTTTTTAGTCTTTGTAAATGTCTATTTT
>A01_168041
TTTTTTAGTCTTTGTAAATGTCTATTTTTT[T/C]TACTTGATCAATAAATTTCACATTTCATCC
>A01_168370
AAGACGGCATATCAACGTGCGAAACTACGC[C/G]GCGTCAACCTATACATAAGCACGTCTACTT
>A01_168598
GAAAAAATATCGTCAAATGGGTCCCATGCA[T/C]TATCCTCATGTGGGTCAGTACAGTAGTAAC
>A01_169112
GCCGGTTTGTTATCGCGTGTTGATAACTGG[G/C]GAAGGGAGAGCGTGGGGGTTCCGCCACACG
>A01_169157
GGGGTTCCGCCACACGAACGCTTAACCAGT[A/G]AGAGGAGGACAGTTTCGCCTATTTATGAAG
>A01_169352
GTTACTTGTACCAATATAATATTTAGATCA[C/A]GGCGTTTTTTTCGTTCATTGTACTTACACA
>A01_169411
CAAACCTTCCAAAAAGAGTTACAAAAATGT[C/T]ATTCTCCTTAATTTTCTTCTTTATTTAGGT
>A01_169610
AGAAACCGAAAGAGATCTAACGTAAAAGTA[A/C]GAGAGGTTAGCCAACTAGTGAGAAAAGGAT
>A01_169894
TGCGAGTGAACAATAGTCGGGTGCTAATTT[T/C]AAAGGTTTGTGTGGTTGGTACTACTAACAT
>A01_170041
CGATCCTTATATTACGTTCCAGTTTTACTG[G/A]TTTACTTAACCACTATTCCATAAATGAGGA
>A01_170652
ACTCTCCATCCATCTTATCTCTAGAATGAA[C/G]ACTTTTCTAAGCGTCTTTCTTTCTGTAACC
>A01_170697
CTTTCTTTCTGTAACCACTCTCATCTCCTT[C/A]TTTTCTCTTTCCCTTCAAGCTTCTTCAGCT
>A01_170949
TTCGTCTCTCTTGTCCCTCACCGGATTAGA[A/G]TCTCTGTCTCTCTCAGACTCCCACATCAAC
>A01_171063
TCGGAACTCTATCTCCGGTCCTGTGACTAC[T/C]TTGTCAAGCCTCGGTTCATGCACCGGTCTG
>A01_171150
CCTCGATTTTCCCGCGAAAATCTCAGGTGG[G/A]ATGAAGCTCAGCAGCTTAGAAGTTCTTGAT
>A01_172006
CTACACCTGAGCTTCAATTACCTCTCCGGG[G/A]CGATCCCGTCGAGCCTAGGCTCTCTGTCTA
>A01_172098
GCTTGAAGGTGAGATCCCTCAAGAGCTAAT[G/C]TACGTCAACTCCTTGGAGACTCTCATTCTC
>A01_172194
TTTAAGCAACTGCACCAACCTGAATTGGAT[A/T]TCACTCTCGAATAACCGGTTAACCGGTCAG
>A01_172804
AATAAGCTCGACGGGAGGATCCCTACGGCT[A/T]TGTCAGAACTCTCTATGCTTTCTGAGATTG
>A01_173313
TGGATTCCACAACGATAGTATGATTGGTTC[A/G]GGCGGGTTCGGAGATGTTTACAAGGCGGTT
>A01_173625
AATCGCCATTGGATCGGCTAGAGGACTCGC[C/A]TTTCTTCACCACAACTGCATTCCTCATATC
>A01_176302
TTTAAACTGTTATTTTTTTGCTGGAGAAAT[G/A]GACCTTCGCTTCGCCTGAAATTAAAACAAA
>A01_176576
CTGGCCGATATGCTCGTGTGCTCTGGGTCG[A/G]AAAATCCTCTTAAAGTTTCTGATTGAGACT
>A01_177042
TATATCGACCCGCGTTTTACATAGCCAAAA[T/C]CCGAATTTCATTCGGATCTTGTGTCCGTTT
>A01_177114
AGTCTCAACGTTCGAAGACTAGGAGGATGA[A/G]GAGTTCTCGATTATGCACCTTTTGGTGAAG
>A01_177424
CGCTCAATGTATGTGTGGTATAAGTTTCTT[T/G]TGGTCAAGTTCTTGTATCCATATATTTTGT
>A01_184190
CTTATTTAATATATCATTTTCGTAAGTAAC[T/A]TACCATTGATTTAAAGATGGCCTTTGGGAT
>A01_185760
TTATGTTATTATATGTATATTAGAAAATGC[T/G]AACTTGTATGGTTAATTCCATAAAAATCTT
>A01_187739
TTCCTGATGTCGTAAGGACGACGTCACTAT[G/A]ACATATAATTGATCCGTGGGATAATAGTAC
>A01_188476
TGCGCTGATCAATTTTTTTACCCTGTATAA[A/T]TATAAGACAATATACCACATTTTAAGACGG
>A01_188566
TAGCTGATTCGAGAGAGCTAGGACTAATCT[C/T]GGAGGTGTCTACTTGTTTACGCATATATCA
>A01_188856
AAGATCTTTTGGGGAAAGAAATAATAAAGC[A/G]GGGCAAGAAGAGAAATGATGACACCATGCG
>A01_191724
CTGGTGACCCAGGTTTTGTAGATAATTGCA[C/G]TAGTTTTCCTTTTATCTTTGATGCAAAGTC
>A01_191785
CGTTGCTTGGGGTAGTTGTGGGGATACTTA[C/T]GACCGGCACGAAGATCCGTTGTTCAGGGAA
>A01_195061
TTAATCGTACTACTATGCTCCATAAGACGC[C/G]TTTATGTAGAAAGGCATAGAAAATGTTCAT
>A01_195156
ACAAAAGTATACTATATTAATTTTTTCATC[C/A]TTACTTCAGCCCACATTTTTTCCTCTGTAT
>A01_195253
ATATTGATTTGTCATGTGGCATTTCTAAGA[A/C]GGCAGTTTTAGCAACATATTATCTTGTCAG
>A01_196969
CCCGCTGCATATGTGCTACTTCTCGAATAG[T/C]TACACACTGCATATCAATCAATATTAAAAA
>A01_197017
TCAATATTAAAAAATGTGGTTGAAATTGTA[A/G]ATCTGTAATAGTGATTGCGCACTTATGCAA
>A01_197190
AGAGTAACAATGATACATTTAAATGGAGAA[C/T]TAAAGACTTTACATATCAACCTTGTATTTT
>A01_202016
GTGATGGGGGATCTGCGGCAACATATTATC[G/A]GCGTCTTTATTGGAAAGTTAATTTGGCTGA
>A01_202724
CACTGGTTATTATTATGTTCAGGGATTTGT[C/T]GAATGCCCCGTCTTAATAGACATTTGTTTA
>A01_203994
ACAAATACCACTTAACCTCCTTTTTTTCCA[C/T]TTCCCCCTGTCTTGGTCTTATAATTTTTTT
>A01_204235
ATTACTTTCTCTTAAAGCACAAGATTCCTT[C/T]GAGGAAGCATGTCTCCTTGTCAAAACACAT
>A01_205326
TACGTTGTTTGTGCACATGAAGCAATATTT[T/G]GGGATAGTTTTAAAATTTCGTTGTTTTCAG
>A01_207363
CGGAGCTGAACATCTCTTAGTGAGATGAGA[C/T]CAGGATCTGGTACATCAATTAATTCCCTTA
>A01_208144
AGTTGTATCAAGCTTCATGTGAGATGTCAA[G/A]AGATCCTCATGACATTCACCATTTGATTGT
>A01_209040
ATGGTTTTCTTTAATTTATATAGAGCACAA[T/C]GATTACAATGCTCTTGGAATCAGAGGGGTC
>A01_209304
TCAGTTTCACATAAAATAAAGGATAGAATA[T/G]ACCATTCGAGAAGTGCATCAAAGATCACTG
>A01_209471
AATTGCCATTTTAATGTCAACCAATCCAGC[A/C]ACTGTAGTGCAATGGCAAATCTATAAATTT
>A01_209679
ATCCAACAGGACAAACCAAAAAGTGAAGAC[A/C]CAGTTTGTTTTATCTGACATAATAATACAC
>A01_209776
AGAAGATCCTAACCTTCTTCCATGTGTAGA[T/G]ATATCATATCTTTTTAACGATCTGAACAAC
>A01_209863
GAGGTGTTAGAGACAACGGCAGTAGATAGT[T/C]AGTTAGATATATTGCAATGGGTTTACCAAG
>A01_211215
AAGAGGACATAAGAAAAACAAGTATCATCA[A/T]CATCCAGTGAACAATTACAAATTATTACAA
>A01_211299
TATTTCATTGTCCTGCAAAAACTTATGAGA[C/G]ATAGGAGATAGCTTAAGAGCAACAAGAAGC
>A01_211523
CCTTCAGAAACTAAAGCATCAGCCAAAACA[C/G]AGTTCTAATTCCAAGATAATAATAACTTAT
>A01_211563
TCCAAGATAATAATAACTTATATGGCACAA[T/G]AAATGGGTCAAATCAACTAGATAGCAAATA
>A01_211749
CAAGAGCGTGGATTTTCCAACGGAAGGAAA[C/A]CCAACAAGTCCAACTCTAGAATCTCCACTT
>A01_211830
GCCAGCAGCAGCACCACCACCTTTAGTAGG[C/T]GGTGCAAGAAGGTCTCTTCTTAGCTTGGCA
>A01_212380
ACAACAATCAGTCAATTTTCTTAATTGAAA[T/G]CAAAAAAAGGTTTCGAATTTACAGCTCTAT
>A01_213264
TTTTATGAAAATACATTTCTTTCCCATTAA[C/T]GTTTTGTTTGGACTTTCTCATCAATCAAAT
>A01_213501
ATATATATATATATATATAAAGACTTTCTA[G/A]GAATTTTTAATATACACCAATAAGTGTTAG
>A01_213674
CTTTTCATTTGATTTGTTCCCCATTCAATG[G/C]TGTTTTCATGTAATTAGCTTCATTCTAGAT
>A01_213755
AAATCCATTTTATTTTCTTAGCCTAATTTG[T/C]AACATTTTCCAGAATATGGAAGCAGCCACT
>A01_213965
AAGAAGTGATCTTCGACAACGATCAGTTTC[G/T]GACAAGAACTCCTCAGGTTCTGACAAATAA
>A01_214000
AGAACTCCTCAGGTTCTGACAAATAAAAGC[A/T]TCAATCTTTCCATTTGATTCAATTTTTTTT
>A01_214053
TTTTTTTTTTTAAATGTCGCTTTTTTATCT[A/T]TTCGATGACTACAAATGCGTTTTCATCTTC
>A01_214187
AAGTTGATACTCTTCTATTTATTTGGGCAT[C/T]AATCTTGAATGAAATGGTTTTAGATACTGT
>A01_214233
GGTTTTAGATACTGTTTTACATTGTATTTG[C/T]AGAGAAAAGCTGAAGAGGTTAAACCGTATT
>A01_214872
TCATTTGGTAATAATGTGTTTGCGTTTGTT[G/T]TATTCAGGAAGTATATGCATAAAGGTATTA
>A01_214923
AAAGGTATTAGCATTTGGCTTGATGTTCCT[T/C]TAGAAGCCTTAGCGCAAAGAATTGCTGCTG
>A01_215218
TCCTTATTCACTTTAGCTTTCCACAATCTC[T/G]CAGGCCATTTTGTGACTAGTTTACTCCAAA
>A01_215800
TTGCGCCTTTCAAGCGCAATCACAGCGCAC[C/G]AAATCATCTTGTCACCACCAGTGGAAGCCA
>A01_216810
AAAATCGCAGTGGATCAGCTTCGGATTCTA[C/A]TTGGAGATTCGAATTCAAAGGAATGTAGGG
>A01_216949
GTGGGCCTCATTTAGAAAAATTATTCCAAC[G/A]TATTGGGCCTACCTTTCTGGGCATCAAAGC
>A01_217210
TTACTTCTTCTCGTGAAAGTAATTAGAAGC[C/G]TATCCTTCTCTCTATGCAACATAAATAAAC
>A01_217707
ATAAAAATTAGGCAGATCTTCAACACCATT[T/C]AACTTTTTCCATGAACTTGCCTTGGAGTCA
>A01_218305
GTTACGGTTCGGTTTGGTTTACGGCAGAGA[G/A]CGAACCAATACGTGTCAAGATTACGAGGGT
>A01_218804
ATGCATTATTTTTCCACCTCATCCATTGAA[G/A]TTCCATAATAGTATAATACTAATCGAGTTC
>A01_219208
TGTACATTTCAGTTTGTTAGTTTTGATAAA[G/A]CTCTCTAACTGCTCAATCATATTCATAATC
>A01_219500
TACAGCAAAATGATATTACTAAAGATTCAT[C/G]ACAATCAAAGTCGGTCCCATAACTAAGCCA
>A01_220101
GTGGAAAACCTCCATCCAGTCGGGAGAAGT[A/T]GAGTTAGAGTCTCCGGCTACGTATATCTTT
>A01_222668
AAAGCTTTCAAAAAAAAAACATGAAACAAT[A/T]ATTCATTAGAGTCGCATATCAACCAAAGGG
>A01_222826
GTTCTCATCAGCTAGCAGTCATTTCAATCA[A/G]ACAGTAGCAGAAAGAATATCCGCATCGAAC
>A01_223131
ATCTAAACTCTCTTTCATTCCAAAGAAACA[A/C]GACGTCTCCTATCACGCAGTGAAAATAGGA
>A01_223181
TGAAAATAGGACACTGCAGAAGCCACACCA[G/T]TCATATCCATTTCCATATCCATAGCCTCAT
>A01_223737
CTGGGATGAAAAGACGGTCGGTTAGGGTTC[T/G]GTTTGGTTTCATGCAGAGAGCGAACCAATG
>A01_224135
TAATATAGTGTGAATTGCGTATGTTACACG[T/C]TTATATTATGTCAATATCAGCGATGGGCTT
>A01_225592
GAGGAACAAGACTCGTGCGTACTAAGCACA[T/G]AATCAAACCACTCAACCTTCCCCCACATCT
>A01_225669
TTCAAACGTAATCTCAGCACACCAGATCTT[A/G]CATTCCTGACTGGTCTTAGTATTCCACAAA
>A01_226243
TGCGCAGGATGCAAATATTTTGGAGATGGG[G/A]CCATCTCCATATAATAGCCACTTGACTCGT
>A01_226506
TAAGCAGTTTATGAGCAAATCGTCAGGAAG[T/A]GACGAGAAAGATATCGACATAGGTTCTGTC
>A01_231946
TTCAAGAGTCAAGATAACAGATTATTTTGA[T/C]ATCATAATCTAATATCTTCAGTAAAAAAAC
>A01_232895
CCTACACTCCTGATTGGTCGCTGTATACAA[A/C]TACTGATCCCACAAAAACCCAATCTTTCCA
>A01_233422
TGGCGTTCGCGTTGCGCGCCATCCCCATGC[T/C]CGGAGCCTGGCGCCACGTGTGAGTGCGACA
>A01_233471
GTGAGTGCGACAGTCAAGGACAGAGACACT[A/T]ACACAATAGTTCCTCTTCCATATTTTGCAT
>A01_233644
AGCCACTTGACCCGTTGGCTACGTTACGAC[T/A]AGGTAGACCGCTTAGAGTGAGCCAATAAGT
>A01_233720
GAAGCGTAAGTAAAGGTAGATACACTTCTC[T/G]GTACGGTTTAGGCGCGAGCGAGTTGCGTAA
>A01_233810
ACGTTTGGAGACGCGTGAGAGAAAGTGATA[A/G]TACAGTCTGGAGACGCGTGCTAAGCAGTTT
>A01_233936
CTTCATCTTTTTATCACGCGGTGGATCTTT[G/A]CCGCTCGTGGCGGCTGAAGATCTAGATTTG
>A01_233968
CGCTCGTGGCGGCTGAAGATCTAGATTTGG[G/A]TTTGGAAGACATTAGAGAGAAAGTTTTCTG
>A01_236192
TACTTTGTTTCCTTCAGATCTGCTTGCGAT[T/G]GATTACGTTTTCTGCGAAATGACTCGCTTA
>A01_236602
TCTGCTTAGTAATAATATATCTTAGTGTGT[T/G]TGCTCTATTTCTAGTTAAATTGGTTATTCA
>A01_236656
TTATTCAACATATGTTATTTTGGATAATTG[G/A]ACTTAGTTAATTGTAATCAGATCCCACGTT
>A01_236952
GACTTGTATTTCTGTGCTTACTGGCCACAA[T/C]CACTATGTTATGTGCGCTTCTTTCCATCCT
>A01_237060
CTGGGATATTGGTTCTCTTAAGAAGAAGAC[T/A]GTGTCTCCTGCTGATGACCTCATGCGATTC
>A01_237245
CAGATGACCGCCAAGTGAAGCTGTGGCGTA[C/T]GAATGGTATTTCCCTAGTCTGTCTCTCCTT
>A01_237897
GAGTGACGTTGTACAAGATGCAAAGAGGGG[C/G]ACAGGTGGTTCTGCGGTATTCATTGCCCGT
>A01_238059
TATCTTTTATGCTGGGACTGGAAATTTGCT[T/C]TGTAGATCTGAGGATAAAGTGGTTATATTT
>A01_242994
CAAGTGGCTCCAATGCCTCGAGGTTTTTTT[C/T]TTTACCTCTTCCTCGAATGAATTTGAGTGT
>A01_248280
CATCGCAACTGTTTTGTTGAGTTTCAGCTT[A/C]TGGGTCTTGTAAAAGGATTAAACTTTTAGA
>A01_248719
TATATAGCAGATAACGGAGTGTACTCGAAA[C/T]TGATATCCGTTATGGGGAAGAAGGGCCAAA
>A01_248879
GGGACAAGGCAAAAGCTTTGGAGAAAGTCC[T/G]TGGTTACTTCGACAAAATGAAAGGCATGGA
>A01_249337
GTTTTCGAGAAGATGAATGATATGAACTAC[C/G]CGCCGAGTTTTATCACGTACGAGTGTATGA
>A01_249610
AAGGCGTATACTAAGGCAGATATGAAGGAG[A/C]ATGTGCAGATGCTGATGAAGAAAATGGAGA
>A01_250613
ACTAGTGTCATTCTAAAATCCTTACTTGAA[A/T]GCAAAAAAAAAACAACTATCATTGATACAA
>A01_250674
GCATTTTTTTTTTGATAATCGTGATGTAAT[A/G]TCAAAAGTTTTCTAGGCTCAAGGACTAATC
>A01_251192
ATTTTTTGAGCTTCATTTTAGTGGTCAACA[C/T]ATTAATATAAATCTCTGTTGAGTTTTGAGC
>A01_251277
TAATTTAAATTTTCAATATTCGAATACTTT[C/A]TTTTCAATTTCTGAACAACTCGAATTATTC
>A01_251405
CTCTGGTTTGATTTGATTCTTGTATCAATC[G/A]CAGCAATGTCGCTGGTTCGGACAGCGTTGA
>A01_251593
TCAACAAGGAGGAAACGCTATTGATGCGTC[G/T]GTGGCCGCTGCTCTCTGTTTGGGTGTTGTG
>A01_251843
TCATTATTTTGAACGCGCTCTGCAGCTCCA[G/A]TAGCGTTTTGTAACATATTTTCTTTTTAAA
>A01_252192
TGGTTATATTGAATAATGCAATATGGTTGC[A/T]TATTGTTTCTTCACACACTTGTTAAGGTTA
>A01_252395
CTTGGAAACAACACGGAAAGCTCCCATGGA[C/A]GCAGTTAGTGACTCCTGCAGAGAAACTTGC
>A01_253580
AAAAAAAACACACTTGTTACTTGTCTTACA[C/A]GAAATTCTTAGTTAGGCTCCAAACAATGGG
>A01_253676
AAAGCTGTGGTGGGTGCTAGCGGTGGAGCG[G/A]ACATCATCGCCGCGACAACAGAAGTTTTCT
>A01_255370
TAGAATAAGGCTTATGAGCCCATTAATATT[A/T]GAGTCATCGAATAACATTTCGTTAAAAGGC
>A01_255488
TGTGATTGATTGTGACGAGAGATATTTCCT[T/C]TTTAAAGAAAACCTATGATTCCACTCTTTT
>A01_255672
ACTTCAAAATTATAAGTAATATTTTTTTTA[T/A]TTTTTTTTTAGTGAAAATGTGTAAATTGTC
>A01_255743
CTTGGATTAAGATCTTACCACAAACTGTTT[C/T]TTTTTTCTGCTATTTATTTGGTGATTTTCA
>A01_255922
GTGAGAGGCAAAAAAAAATAGAAACTTTTT[C/T]AAAAAGACTAGGTGACTTTTGAGGAATGGA
>A01_256310
TTTTATTGGTCAACACATTAAGATAAAGTT[T/C]TTTTGTTGGGTGTTGAGCTATATTGTCTAT
>A01_256721
ATTGATGCGTCGGTGGCAGCTGCTCTCTGT[C/T]TAGGCGTTGTGAGTCCAGCCTCTAGCGGTA
>A01_257860
ATTAGACCAAGGTTTTCACAGAGTTTCTTG[T/C]AGTGCAGGTTTTGAACATTCTTTCTCAATA
>A01_258020
TTTTGTAGATGTTACTAAGGTCGTTTCAGA[C/T]ATGCTGTCTCCGGAATTTGCAAAAGACTTG
>A01_258456
CAATGTCACCCACCATTGTACTCAAGGTAT[T/C]GTCAAATTATTACTTGTGTTACGAAACTAA
>A01_258502
GTGTTACGAAACTAATAGTTCGACTCCAAA[C/T]AATGGGTTTTCATGCGCTTGTTTACGTTGT
>A01_258576
GAAAGCTGCGGTGGGTGCTAGCGGTGGAGC[G/A]AACATCATCGCCGGGACAATAGAAGTTTTC
>A01_258630
AGTTTTCTTGAATCATTTTTTCCTCAACAT[G/T]GATCCTCTTTCTTCCGTATTGGCTCCAAGA
>A01_258773
GCAGCTGATACCAAACAGAGTTTCGTTTGA[A/G]AATTGGACGACAGTGTTCAATGATCATTTC
>A01_258894
GCCGGAGGAACGATTGCTCAGTTCATAGTT[G/C]AAGAATCTGATGGAAATGCCGGAGGAATGA
>A01_258979
CAAGGAAAGGAGGGTTCCCCTCAGGATATT[A/G]AGTTTGTATTTAGTATTGTGCCATTGTTAA
>A01_263710
ACTTTTGGTTGTTGAAAGACAACACATAAA[T/G]ATTTAGCTTAAGACGGTATAACGTCATGAA
>A01_263753
ACGGTATAACGTCATGAACATTAAGAAAAA[G/A]CAATGATTTTATGACAAATAAGAGACTCTC
>A01_263799
AAATAAGAGACTCTCGCATAGAAATTTAGC[G/T]TATATTTGAATCGTATGGAAGAGTTAGTAG
>A01_263922
CATCGACTTAAGAAGATTTTTTTTTTAACG[T/C]TGATTTATTATGATCTTATTGTAAGAAGAA
>A01_264009
CATCAACCAATCAAGTCTAATTACTAAAAA[A/G]ACATTTTCTTCTAACCATACAAACTAATAA
>A01_264977
TCACGCTATAGGTGATTTCGCTGAAGCTTT[A/G]GCTGCTAAGATGCCTGGAAACCTTAAGGTA
>A01_265263
AAGTACCCGTTACCACAGGTTTGTCCCCAT[T/C]ATCAAATTGATTCCTTTTAATAGTTCATAT
>A01_265342
AGTTTTATCAACTGCGAAGCCAAGTCGTTA[A/T]ACCTTTACCACCCACGTTTTAGACTCATGA
>A01_267237
TTAACTTACGAACTAGGAACACATCGTCTA[T/A]CGTATTCTATTACGGTAATATCCATTCGAC
>A01_267486
ATATGGGCTGAGAAGCCAAGAATAGAAAAA[G/T]AAGAGTGTAATTAGTCAATTATTATGAGTG
>A01_268223
CCTGTGCTAATTGCAAGCAGTTGGTGCTAG[G/T]TATATTAATTTCTCATAAAAAAAACATAAC
>A01_268333
TTTAATATATTATCACCATCACCATGCTGT[A/G]TCTGTATTTATGTGTTTGTGAATCATATAC
>A01_268806
CACATGGGGCTTTGTAATGTATAGTGTATA[C/A]CACGATCTTTGGTATAGTTGAATTGATAAC
>A01_269042
TTAGATGAAACCTCCCTTCTAATTAATTAT[T/G]TTTAATGAATGAATGATTAGTAGTTAGTAA
>A01_270765
GATTGCTTTTGTCTTCTTGAAAAGATCATC[A/C]AGAGTGACTATGGGAGCCTCTTGTTCCTCC
>A01_271314
GGAAATTGGTAGGCTCCTTTGGAGATGGAG[G/A]AACTGCCAACAAATATTGAGCACAATGAAT
>A01_271516
ACGGCTTGTGCTTCAGGAACTTTAATATTC[T/C]CAGAGTTCCATCGGCGCTGCCTCTTTGCAG
>A01_271556
ATCGGCGCTGCCTCTTTGCAGGCTCATTGT[T/G]TCCAACAGCTTCTTGATCTACAATGAGAGG
>A01_272041
ATGCGATTTGCCAATGACTGTTGATGGCTC[A/T]TGGGACTTACTAAGACTATGTTCTAATTTG
>A01_272565
ACTCTTGTTGCTCAGCACGAAGGGCATCAT[C/G]GAGACGCCTAACCAAATCCAGCTTCAAGCC
>A01_272671
AACCTTCCACTTGTCGATTGGGCGGTTGTC[C/G]AGGATTGGAAAAGGTGATGACGACATCTTC
>A01_273642
AAAATGACGAAACTATCCTTGGTTATTAAG[A/T]TCTTAACATACGACGCCGTTTGGGAAAAGC
>A01_274047
TAGTAGCTTGCATAATTGAAAGATAGACCC[A/T]CCTCTTGCATAATTAGTTATTTTCCTGTAT
>A01_274292
ACTTTACTTTCCTCTCTCTGTTCCTTCAGT[G/A]TTTCGTGGATTAGCAGGCTCTTTCTAACTC
>A01_274835
CCAGAGGAAGCACTATCCAGTGGAACAGAT[G/A]CAGTACAGCCGCTGAACCAGAAGGTGAGGC
>A01_275499
ACAGGTTAAAAGATTGTTGATGAATTTTAA[T/A]GTTAGACACGGCATTCACTTTCGGTCAGTA
>A01_275819
ACTTCTTCTCGCCGGTTCCTTATAGTTAGA[G/T]GTGTGATTAGATTATGGTATCTAACTATTA
>A01_276032
ATTTGTATTTACGGAGAATGTCAGCTCCTT[C/G]GACGATATTTGATATACAAAAATTGAATTT
>A01_276988
TAAGTCGAGACAACCTAGCTAGCAACTCAT[T/C]GCAAATCGAAACCAAAACAAATATCCATAC
>A01_278389
TACACAACATAAACTGCTTATAAAATGTTT[T/C]TATACATACCCATATGATTCTTGATCCTCA
>A01_279739
TTAATCAAAATTTTACCAAAAAAATAAAAA[T/A]AAATAATTAATCAAATTGTCGTAAAACATG
>A01_280146
ATGGTGGGTCTGAAGGAACTTGTGTAGTGA[G/A]ATGATGTGAGTGTTAAAGTAGAAATCGCCA
>A01_280415
ATAGTTAAAACTATTGAGTGATTAGACCTA[T/C]AAACCAATTAAATTACGTTATCATTTTCTA
>A01_280987
GAGAACCTGAATCCAATCAGCTGGATAGTA[A/C]CATGATGCCCATATTTCCAGTGGCTTATCA
>A01_282473
GAGTTTGAAGAAGAGACTGTAGATTCATAT[C/T]CTCAAAGCTGTTGTTAGGGTTTTGATATTG
>A01_283358
ATTAAGTGGTTCCACCACCACCATCCACTA[T/C]TGTCTACTCTATATATTATATACATGTATC
>A01_284012
AAATTACATATATTGATATATAGAATAATG[G/A]TTTGTGTAGATTTGGATGGACGCAGAGTTT
>A01_284089
TCATCTTTCGTGTTGTTTTAAAATTTCTAA[C/T]TACATTATACATTTATATTAATATATGTTA
>A01_284134
ATATTAATATATGTTAAACTTTCTTATCTG[G/A]TACGTGGATATCGTTCTAATTTTTTTATCT
>A01_284234
CACTAACAACTATAAAATTGTTATTCTCCA[G/A]AGAAACGAAGATAACAAATGTTCCAAACCT
>A01_284300
ACCATCATCGTAAGTTAGTGCAGAATGCAA[C/T]TATGCATTAAATTAATATTGTCATATTTTT
>A01_284483
TCTATTAATGTATGTTAAATTCCCTTTCAT[A/G]ATTCATGGACATCGTTCTAATTTTTTATCA
>A01_284767
TGCTCTATATTCTGAAGTATATCCTCTTCA[C/T]TGTTGTTTTAAAATTTCTAAACATATTCTA
>A01_284948
AATCACTATTCTCTTGAGAAACGGAGACAA[G/A]AGAGGTTTCAAACATCTTTGACCATCATCA
>A01_285002
ATCATCATATGTTAGTGCACGATGCAACTA[T/G]GCATTAAAACAATATTTTCATATTTTAAGA
>A01_285078
TATATGTAAACCCCCTACGAAAATAATGAG[C/T]TTTTCGATAAATGCTCTATATTCTGAAGCC
>A01_285120
TGCTCTATATTCTGAAGCCTATACTTTTCA[A/C]TGTTGTTTTAAAATTTCTAAACACATTCTA
>A01_285197
TGTTAAACTATCTTTCATGGTACATGAGCA[G/A]CATTCTAATTTTTTATCATTAAATTTATTA
>A01_285236
TTTTTTATCATTAAATTTATTAAAACTTCA[C/T]ACATTCATTAAATTAGTGGACTTACCACTA
>A01_285312
ACCGAGACAAGAGAGGTATCAAACAACTTT[T/G]ACCATCATCGTATGTTATTGAAAGATGCAA
>A01_285471
GAAGCATATACTCTTCAGTGTTGTTTAAAA[T/A]TTTTTAATCACATTCTAAATTTGTATTAAT
>A01_285512
CATTCTAAATTTGTATTAATTATGTTAAAC[T/A]CTCTTTCATGGTACATGAGTACCGTTCTAA
>A01_285599
CTTCATACACTCAATAAATTAGTGGACTAA[A/C]CACTATAAAATCGCTATGAAACATAGACAA
>A01_286090
TATTTTTTTCTAAAAATCTATGTGTTAGAT[T/C]CTACGAATTTATTGAGTTTTAGGTAAATGC
>A01_286122
TACGAATTTATTGAGTTTTAGGTAAATGCT[T/C]TATATTTTGAAGGCTATACTCTTCAGTGTC
>A01_286333
ATGTTTTCTGGAGAAACGGAGACAACAAAG[G/C]TCACAAACCTCTTTGACCATCATCATATAA
>A01_286375
TTTGACCATCATCATATAATAGTACATGAG[G/A]CATATGCATTAAAACAATATTTTTTATTTT
>A01_286517
CCTCTTCACTGTTGTTTTAAAATTTCTAAA[C/A]ACATTCTACATTTGTATTAATGTATGTCAA
>A01_286841
AGTTTTTCGAGAAATGCTCTATGTTCTGAA[G/A]AATGTCATCTTCACTGTTGTTTAAAAATTT
>A01_286903
TAAACACATTCAACATTTGAATTAATATAT[G/T]TTAAACTATCTTTTATGGTACATGAGCAAC
>A01_287257
CACATTCTAAATTTTTATTAGTTATGTTAA[C/A]CTCTCTTTCATGGTACATGGGTACCGTTCT
>A01_287393
TGAAACGGAGACAACAAAAGTTTCAAACTT[C/A]TTTGACCATCATTATATGATATTGCAGGAT
>A01_287452
ATGAAACTATGCATTAAAATAATATTTTTA[T/G]TTTTTCTCAAAATCTATGTGTAAATCCCTA
>A01_287736
AGAGAAATAGATATAACAAAGGTTTCAAAC[C/T]TCTTTGGACATCATTGTATGTTAGTTCAAG
>A01_288176
TTTTTCTTAAAATATATGTGTAAACCCCGA[C/A]GAAAAATATTGTTTTTCATTAAATGCTCAA
>A01_288228
AATGCTCAATATTCTGAAGCCTACACTCTT[C/T]AGTGTTTTTATTTAAGTTTTTAACCACATT
>A01_288293
ATTTTTATTAATGAATCTTAAACTCTCTTT[G/C]AGGATAGATATGTAACATTCTAATTTTTAT
>A01_288693
GGACCTGCAGAAAATACGTGTGCTTCTCCC[G/A]GATTATGAAGAGGTGATTCAACGACTAAAA
>A01_288870
AGTTCCTGGTACAAATTTTGACTGGAAAAA[G/A]AACGTTTGGAACCTAGATGTTGCCCCAAAA
>A01_289005
AGTGGACCCTCTCTGCAAACGGTGTGGAGG[A/T]CTTGAATCTATCACTCATCTATTTTTGCAC
>A01_289047
CACTCATCTATTTTTGCACTGTCCTTTCGC[G/A]CAACAGGCTTGGAGTATAGCGCCTTTTGTG
>A01_289154
CATCAATTCGTACCAGAACTTGCCTTCCCC[T/C]GTCGGGAGTAACAAGTGAGACCCTTGGCCT
>A01_289201
GAGACCCTTGGCCTCTGGATCATTTGGAAT[A/C]TGTGGAAAGCGCGAAACAAATTCGTGTTTG
>A01_289378
CAGAAGAAACAGAGCCCTCCCGGAACGATA[G/A]TCATCAGATCGGACGCGGCTTGGAATCTTG
>A01_289528
CTTATGGCAGAAGCCCTAGCGCTGTTAGCA[G/A]CTATTAAAGAAGGAGCCCACGAAGAACTGA
>A01_289650
TTCGCCGGTGATCTACGGGATTGTCGCAGA[C/T]ATTCTCTCCTTTGCTTCTGTGTTTGAATTT
>A01_289681
ATTCTCTCCTTTGCTTCTGTGTTTGAATTT[G/T]TTTCTTTCTCTTGGATCTCTCGAGAGAAAA
>A01_289870
AAAAAAAAAAACTCTTCAGTGTCCTTTTAA[G/A]AATTCTAACCACATTCAAATTTATATTTAT
>A01_290038
ATAGATATTACCTAGAGAAACGAAGACAAC[A/G]AAGGTCACAAACCTCTTTGACCATCATCAC
>A01_290080
CCTCTTTGACCATCATCACATAATAGTACA[G/T]GATGCAACTATGCATTAAAACAATATTTTC
>A01_290195
GTTTTTCGAGAAATGCTCTATATTCTGAAG[C/T]ATGTCATCTTCACTGTTGTTTTAAAATTTC
>A01_290489
TTTTCATATTTTTGAATATTTTTTCAAAAT[T/C]TATGTGTAACCCCCTACGAAAATATTGAGT
>A01_290589
CGCTGTTGTTTTAAAATTTCTAATCAAATT[C/T]TAAATTTGTATTAGTTATGTTAAACTCTCT
>A01_290626
TGTATTAGTTATGTTAAACTCTCTTTCATG[G/T]TACATGGGGACCGTTTTAATTTTTTTTTAT
>A01_290750
ATGAAACAGAGACAACAAAAGTTCAAACTT[C/T]TTTGACCATCATTATATGATATTGCAGGAT
>A01_290816
TATGCATTAAAACATATTTTTAGTTTTTCT[A/C]AAAATCTATGGGTAAACCCCTACGAAAATA
>A01_290849
AATCTATGGGTAAACCCCTACGAAAATATT[G/A]AGTTTTTCGTTAAATGCTCTATTTTCTAAA
>A01_290954
TTTATTAATTAATCTTAAACTCTCATTTAT[G/A]ATAGATGAATAACATTCTAATTTTTTATCA
>A01_291147
CAACTATTCATTAAAACAAAATTTTCATTT[T/A]TTTTTATTTTTTTTTCTCATAATCTATGTG
>A01_291183
ATTTTTTTTTCTCATAATCTATGTGTCAAA[G/C]CCTACAAATATATTGAGTTTTCGGTAAATG
>A01_291297
ATTCTAAATTTATAATAATTTAGGTTAAAC[A/T]CTTTTTTATGGTACATGGGTAACATTCTAA
>A01_291498
TACAACTATACATTAAAACAATATTGTCAT[G/C]TTTTTGAATTTTTCTCCAAATGTGTAAACC
>A01_291609
CTTCAATGTTGTTTTAAAATTTATAACCAC[T/A]TTCTACATTTGTATTAATTATGTTAAACTA
>A01_291919
GAGTTTTCGGTAATACTCTATATTTAAAAC[T/C]TATACTCTTCAATGTCATTTTAAAAATTCT
>A01_291952
TACTCTTCAATGTCATTTTAAAAATTCTAA[T/C]CACATTCTATATTTGTATTAATTTATGTTA
>A01_292028
TAAATGAGTAAGCTTCTAATTTTTTATCAA[C/T]TAATTTAGTAAAACTTCTTACAGTCATTAA
>A01_292093
GTTGACTAACCACTCTAAAATTGTTATTTT[T/G]TTCTAGAGAAACAGAGATAACAAAGGTTCC
>A01_292166
ACATCATCATATATTATTTCAGGATGCAAC[T/G]ATGACTTAAAACAATATTTTTCATATTTTT
>A01_292205
AAACAATATTTTTCATATTTTTGAATTTTT[T/C]TCAAAATCTATGTGTAAAACCTATGAAAAT
>A01_292477
AAAACGTAGACAACAAAAGTTTCAAACCTC[T/C]TTGACCATCATCATATATTAGTGCATGATG
>A01_292620
TTTCGGTAAATGTTCTATAATCTGAAGTCT[T/C]TACTCTTTAATGTTGTTTTAAAATTTCTAA
>A01_292839
GTTATTCTCTAGAGAAACGGAGACAACAAA[A/G]GTTCGACCGACCAAAATATTCAAAATATTT
>A01_293035
CCATCTTCGGATTCAACAAGTACCTATACA[C/T]CCAACATATCAACATTTTAGCACTCTTTTT
>A01_293133
ATTGGAGTAAGGTTCCTTACATGTTGTGAC[A/C]AGTACCAACGAGATAATCGTCACCATCTTC
>A01_293416
GACAGGGAGAATCTTCTGGTCATGATTAGA[C/T]TCTGTTTCCATCAAGACAAGACATGATTAG
>A01_294767
CATTGAGCTCAACCATGCGCGATTTTACCA[C/A]AAAACAAATGAATCCTCCTTTCATATCTGC
>A01_294974
TGCACTTAGACAATTCTATCATCCTTCCCC[A/T]GTCATGATTGTCCGCAATATAGAGAATCTT
>A01_295381
GGAAAAGTTGCATGTGGTACGATAGTGAGT[G/A]TAAAGAGTGGAAACCGGTCAAGGGTTTGTC
>A01_295803
TAATTCCCTGAAAAGTTGGTGTTTTTTTTT[A/T]AAAATAGTTTAGCGTGACACTAAGCCAGTT
>A01_296157
TTAAAGGGGTATATATAGCTTGATCTCGTA[A/C]GTTACTGGTCAAACTGGACTGATTTTCACG
>A01_296634
ATTTTACATTTTGTTTCCCAATTCGTATTT[C/T]TTTTTACTAAGGAAAACAAGACAAGCCCAT
>A01_298504
GAAACTTACTGCGAACAATAATTGGTCGAA[C/T]GCTCCTATTATTGTGCGTCTAAGATTTATA
>A01_299033
AGATAATAAACATGATTTTGGTGAGGTTTG[C/T]CAATTATACATACACATATATATGCACATG
>A01_299510
AAAATATATACGCATTTCATATAAAATTAT[G/T]ATTACTGCAATAATAATTTTGACGCAGTTA
>A01_299782
TCTCATGGCTACATACACACTTATAATTAG[T/G]TCCATGTATAGGATATAAGAAGTCAATCAA
>A01_301561
TGTAAAACACTTAATATGAACTTAATATTT[A/T]TATCGAATTATATATATATCAATTTACCTC
>A01_303100
ATACAGTTTCATTTATTATAAGAAAAAAAA[C/A]CAACATAGATAAGCAGAAATTAGAGCTTGA
>A01_303886
GGTCCTAATTTGTTTTTATTAGTAATCTTC[C/A]TGTACTCGAGATAAATATAATAACAAGTTT
>A01_304718
ACTTTAATATTGCATCAGCCAATTATAACC[C/A]CTAACATGTAATTTTATTAATACGACAAAA
>A01_307193
AACACCCGCATATGTATATATGTGATTCTG[C/A]AAGAAGGTAATAACATATGTGTCAAGTTGC
>A01_307426
CTTCTCGGATCATTAATATAGCGATCTGTT[A/G]GGCTAATTACACTTGACCAAAGTCTGAAAC
>A01_307766
CAAACCACCAAACGAGTAAATTCCAGGACT[A/G]TGTACTTTATGGAAAGAAAAGCATAGTATA
>A01_308009
AAAACAAATATATTGAAAAAACAAATATAT[T/A]TTTGTCCATTGAGTCGATGGCCTTGACTAA
>A01_308882
TATAAAAGGCTCTAATAGCTAGAAAATACC[G/T]ATATCTTTATAATGTTCAGTTACTTTAGTA
>A01_308975
ATAAATATGTACATATATACGATCAAAACG[A/G]ACGCATGCATAACTTATATATATATGAACG
>A01_309034
CGAATGTAAAAAAGGGAACTGAATCAATGT[A/G]ATTTTTTAGACTTACTTTCTGAAATAAAGT
>A01_309524
ATGTGATATCCACTTGTGTCTAGTTGAATT[A/G]TCCGGTGTATATTTATGTCTATGCCACATT
>A01_309688
ACATAGGTTAACTATTCCACGCGAATAGCA[T/C]GGTGCAGCGATGTCGATCTCGAAATTATTT
>A01_310682
CCTTTAAGAAAACCCTAACCTAGCTCCGGC[C/T]GCCGCTCGTCGGTAGCCGGAGGCGTCCATC
>A01_310734
GCGTCCATCTCTAACCCTTCCTCTTTTGTT[C/T]TTTGCTCCTCTTCTTCTCGTCTCCCCTTAG
>A01_311370
TCTGATATGCGCCTTGGTGTTGGTACTATT[G/A]ATCATGGGCTGAATGCTTATCATTAGAGAT
>A01_312233
TTTTGTTCGGGTTCAGTTATTTCGGATCGG[G/A]TTCGGATATTTAGATTTTGAAAAATTAAAT
>A01_312280
TTGAAAAATTAAATTAAATTTTTCATTTCT[C/T]AAAATTTTTATATTTAAAAATATAACTTTC
>A01_312494
AATGAGTAGCAAATCATTTTCTCTGTAATT[C/T]TATGTATATCATATGAACTTAAAATATGTG
>A01_312715
GCAGCTTCGGATATCGGGCAAAATATCCAC[C/G]CCTATTAACCACAAACAAAAAATGTAATGG
>A01_312988
GTTCTCATGGCAAAAGAAAACCCTTACGTA[A/G]TAGTTTTGAACATTATAAGTAACTATCAAA
>A01_313063
CTTCCTCCATAAACTCCTAAACCTACTCAA[G/C]TCATTTTGACAGTTTTAAAGACATTCAAAT
>A01_313255
AAAAAAACAACCATAAAACTACGACAAAAA[T/A]TGATTTAGATATATTAATATTATGTTATTG
>A01_313788
ATATGACAAGATAAATATATTTTTATTAGT[C/A]TTCTATAATAGTATTTACGAAGTGATTTTT
>A01_313896
TATCTTTAATGAATAAATTATATAAATTAC[C/A]TATAAAATAAAAACGAATTTAAATGATTTT
>A01_313949
ATGATTTTGATTAGATAAATGTATAATAAT[G/A]ATAAAATTATCCAAATCTAAATATATATTT
>A01_313998
AAATATATATTTATATATATTAAAATAAAA[A/G]GATAATTCCTATATATACCATGTGTTGTTA
>A01_314381
TTAGTTATAAAGAATCACAAGTTCAAAAAT[A/C]TATTTCAATGTTTTTTTTGCCGTGAAGCAC
>A01_314548
TAATGTAATTAAAAAGTCTAAAAAATAAAA[A/G]TTAAGTAATTTTTATTTATTATTTTTAGAC
>A01_314983
AATTATTATTATATAACATAATTAGTTATT[T/C]AATTAACATACGGTTCGTTCATGGTCGACC
>A01_315190
TACGTTATTTAATAATGGCGACAACAGACT[C/T]TTAGATTAGTTGTATACATCATTGTTAATC
>A01_315427
TACAATATATTATGGAATTTCTTTATAAGA[A/C]ATATTTCTATCAGTAGCATTTTGCTTTGTT
>A01_315491
CCCATGATTATGAAATATGCTAGGTTTGTA[C/T]TTGGATCCGTAAATTTTCTGTTCCCATCAT
>A01_316017
ACAGAAGGAAACTTCTCCAGCACGAAACTC[C/T]CAATCTCATCAAACCCTGAATCCGAGAAAT
>A01_316836
TTGGAAAAACAAGAGAGACAGGGAAGGATA[T/A]AAACTGATGTTAGTTATATTTTTGCTCTCT
>A01_316868
AACTGATGTTAGTTATATTTTTGCTCTCTA[T/G]AAATTTGATTTTTGTTTTTTTTTTTTGGCA
>A01_317069
ATGCTTTTGTTCTATTCACAACTTGTTAGC[T/G]TCTCGTCAGCTCGAAGATATCTTTTATTCA
>A01_317166
TTCTTTGGATCTACGCCGTTCCCGGGGAAT[G/A]TTTCAAAAGAATAGACTTTATGACGTGTGT
>A01_317355
AATTCCACCATACAATAAAAAGCGTTAAAT[G/T]TATTTCACTAGTCACATTTCATTTGGTCAT
>A01_317588
ATATATTGCATAATGTGTCTGGTTTGTGTG[A/C]TAAAATTTATAAATAACTTTTTACAGAAAT
>A01_317785
TGATTCTACAGCAAGTTGAAAGGCCAATTT[G/T]CCTTCTAGCCACTTATTTTCTTTGAGCCAA
>A01_317893
ACTCATACGAATTGGAAGGAAAACAAAAAA[T/A]GGAATCATTAGTTGAAAAATCATCCATGCA
>A01_317976
ATATCAACCATGAGAAATTTGGTGGTCGTT[A/G]TATTATTCCCTATTCCAAAATGTAGTCTAT
>A01_318049
ATAAAATCGTATTTGAGTATTACTCACGTA[G/A]ATGTATCTTCAACTATATGAGTATGCATAG
>A01_318102
ATGCATAGGTAAAATGTATGTACAAGTGGG[G/A]AATATGAAAATATAATAAAATAAAAGATCT
>A01_318214
AGATGGAAAGAGGTGAGAACTCAGGGAGGT[C/T]GAAGTTTGCGTCACAAGGAAGCAAATGGAT
>A01_321082
ATTGCACAGTTTTCTTATCTTTTTGCACCG[A/C]GTAAAAACATCATAAAAACCGAAAGTTAAT
>A01_321540
ATTCGTAGATTTGTGGTTAGAGATCTGAAA[T/C]ATAGCAAGGACACGTAATTCCACACACGAT
>A01_321990
TATTTTAAAAACAAAAGAAGCTAGTTGACT[G/T]TCACATATGTCAACTCTTCCTCCACCATTG
>A01_322363
AGAACCCTAGTTGTGTCACTGTGTGTATAA[A/C]AATAAACAAATAAATGCTGGTGCATGGATA
>A01_322902
ACCACAATTAGAATGATTAGTGTAAGCAAC[T/C]ACAGCTTCTTCACTTTTCACCTTCACATCT
>A01_323027
AATGCACGCTCGACAAATCTTCAGAAACCA[G/A]CACCGAATCCTCCTTCTCCTCGCCCAACAT
>A01_323208
GGACCACGGTCTTCGGTTTCTTGTAGAACG[C/T]TCTTGAGGGAGCAAAACACAGTTGTGTAGC
>A01_323546
CGTAGCTAGGCATGCGGGTTCGGTTTCTTC[G/T]GTTAGTTCAGTTTGGTCGAAATCTCACCAA
>A01_324768
CCTCTGCTCTGTTTTGAAATCCTCTGCATT[A/G]CTCTGTTTACTCTGCTTCTCTAATCCTATA
>A01_325002
CGTGTAGCTTAGACTCAAAACAGGTTTAGG[C/G]TTAGTGTTGTGACTCAACGGCGAGTCAACC
>A01_325074
GTCGTCGTCGTCAGGGTAAGAAGAGGAGTT[G/A]TGAGAAGGGGATGAAGCCACAGCAGCTACA
>A01_325900
GTTTATGGGTCTTTTATTTGAATATGAACA[C/T]GAAAGCTAAAGTTTTTTTGTTTTCTGTTTA
>A01_327073
TCAGATATAATTAAAATAAGAACAGCTCAG[T/C]TTTGTAAATTTTTAGCTTATTTTTCAAATT
>A01_327116
TAGCTTATTTTTCAAATTGTGGACGACACT[G/A]AAGTATGGAGACTCAAACAATCATATAATT
>A01_327457
AGTTTTAGGATTTAGGTTCATCAAAGGTTT[G/T]AGAAGCCTTGTAAAAGAAGACATATCTGAG
>A01_327564
CATGCCATACAAGTTTGGGCTTGAATCTTA[G/A]TACTTACAAGCATGCGATTACTAACACGGA
>A01_328370
GTAAATACGTATACATGAATATAAAAATCA[C/T]ACACCGTATTATTGCGTGTGTATATAATGG
>A01_329057
GATGATTGGTTTCACTTTTATTTTTTGGTT[T/C]GAATGCATCGGAAAGTTATATTTTTTAAAC
>A01_329604
TTTTAATTAGTAAAAAGTACACACTTCTTA[T/A]ATAAAAGTCACATCATCTGCCGTATTCTAT
>A01_329639
AAGTCACATCATCTGCCGTATTCTATGGCT[A/G]GTACATGAATAGTGACAGTGTGAATAATTT
>A01_329989
GAATGAAGAATGTAATTTATAGCTCGTTTT[T/A]AAAAAACCTAATTTATAGTAGCTCGTTGCT
>A01_330635
CATGATTAAATATCGCAAATTACAGTAGTT[T/C]ACACATTATGGAAGTGAATCATAAAAGCGA
>A01_330866
ACAAGAAACATAGAAGTCTTATATTATGGG[A/C]TAATTAAAGATTCTTAAACGCTTCATGTTC
>A01_330997
AGCCCGCTGCTTCGACAGCGCATTAACCAC[C/T]GGTGTTCCCGGCGGCACGAGCGGTGCCTTG
>A01_331266
TAAGAGAGAGTCCTCGCAGGTATTGTGCAT[G/C]ACAATTGTGTTCTTGCCTCCCATGAATATC
>A01_331438
TTAAATATCTTATCGTTTATTTAATTAGTT[G/A]TTATAGATTTAGATAATTATGTTTATTGTT
>A01_331758
CCCCGGGCTCGAAGAGGATACCGTTGCTAG[C/T]AACCATATCATCCACAACATTGCTTTTGGA
>A01_332883
GAGACTCTTGAAAGGAGCATAGATCTCTTC[G/A]CCGTTAAAGGATCCGACACGAATAGACGAT
>A01_333247
TTTGTTTTACCCTAATTTGGGGACACGAGT[G/A]TCGGTTTTGAAATCGTATTTGACAACCTTA
>A01_333367
GTAATCGTACACAGACTGAATCTCATTCTC[C/T]GTGTACTTCACGTTCGGGCTCTCGACTTTG
>A01_333635
GTGTGAGGGGTCTCGCACGTGAGAGGCGCG[G/A]AGAGAAAAAGTGTGACACGTCGGAGCCCTG
>A01_333856
GTTACAGTTAGTTAATGACAGTTGTTCCTC[G/T]GTTACGGAAAAAACGAGAGTGGAGTAAACA
>A01_338911
AAACCTTTTTCTATATTTCTCCACGCCACA[C/T]ATTTATCTTTATTTCACTTTCTTATTTTCC
>A01_339279
CAGAATGTAGACGATCAATTTTGCAAATGG[T/C]AAACGAAATTAGCAAACATATTTGGCTTTG
>A01_339319
TAGCAAACATATTTGGCTTTGTTGAACTTC[C/G]CTTCGCGGTGAACGGACAGGCTCTTTCTAA
>A01_339467
TACATATGGAGGTTAAGTACACATAGGATA[A/G]GGATACCAGTGATGGGAAACACAAAATTAA
>A01_340022
TATATATATCTATATATATATATAAATATT[G/A]TGAAAAATAATAAATAAACTTAAGACAAAA
>A01_340098
AAAGAAAAGACTACATACCAAGAAAAGCAC[T/G]GTTGCACAATGCTTGAGGACCTCTAAATTC
>A01_340215
TCTTACGAGAAACGTAACATTAATACACAC[A/G]TAAATATAACCAAGGTATATACCTGTGTTT
>A01_340306
ACTTGCCATCTACCATATGATTAAAGCTTT[G/T]TTAAGTATACGTTTTAAATTTTCACAAAGA
>A01_340474
CTCAGGCGCAGCTTTACCAATCTCAGCAAA[G/A]GCTTCCTTAATCCTAACGCAGTCAAACCTT
>A01_340672
AAGGTCTTTGGGTTGTATAAGCGTTGTGAA[T/G]CTCTCTACCTCCTCGAGTGTTCTTGGACAT
>A01_340954
GGTGGTTGTTTAGCTTCATGGAGAAAATTT[T/G]GCTGTGTAAGGTAAGTAAGAATCTTTACTT
>A01_342783
CACTTGGTCCACCTCACTCGTTTGAGCAAG[T/C]GATATATAAAACGTAGTTTCTTTGTCTTTC
>A01_343081
CAATTTACTACTGGACATATTTTCGGCTTC[G/A]GTTTGGTTCGGTAGTTTCGGGTTCGGTTTG
>A01_343172
GAAAAATCGGTTCTCATTTGGTTCGGGTTC[G/A]AATTTTTCGAATAGTTCGGATAGTTCAAAT
>A01_343661
TTTCTTTCTCTTATGCAGTATAAAATATAT[A/T]CATTCAAAAGTAATGTTGGTATATGGAATA
>A01_344135
AATATACTTTTATCTTTTCACGACTTTCAC[C/T]TGTTACTGAATATTTGCGCACTAGTCAAAA
>A01_345182
TCTCTCAAATGATTACAATTGTTTTTACTC[T/C]CCCACGTACAATGAATATTTATTTTTTACT
>A01_345437
ACACGCAAACACTCATATATATACACATAA[G/A]CACACTGTCACTAATGCTTCTCTCTCTGTC
>A01_345783
AAGAAGCTTACAGATTCTGTTACATCACCA[T/A]CATCAACATCCGGTACAAAAAAGAACCAAC
>A01_346287
TCACTCATCCCAGACCTAGAGAGAATCTCA[G/A]CCACATCGAAAAGCTACATCAACAAAGCCA
>A01_346369
TTAAACCTTACTTCGGCAACAAGTACTCAC[A/C]AACCATCGCCTCCGTAGTCTCCTTCGTCTT
>A01_346846
CCACGTGTTTTCTTCTGATTTGTTTGTTGT[C/G]TAGTGCGGAGAGGAGGAAGAAAGAGTACTT
>A01_347128
ACTCGTAAAATATTGTTATTTTAAGTTTTC[T/A]CTAAACTTGTAAAATGTTGCGTGGAAAATT
>A01_347657
GGTTTCTTGTTTCGGCATAGACATCAAGGA[C/G]AGGTTCACAAAAAAAGAATCTTGTTCTTTC
>A01_347731
TGGACTAGTGAATGACGCTTTAAAACCATT[G/A]AACAAAATGCCCACAACATTTTGTTTCAGC
>A01_348080
TCGGAAGAAAAAGCTTTTTTTTCAAAAAAA[A/G]AAACAGTTAGAAAGAAAGATGGAGAGAAGC
>A01_348279
AAAAAAAAAAAAGCTGAGAGTTTATTATTG[T/G]TCTTTGTTCATTTTCAGCCGTCAGATGGAA
>A01_348362
TCAGATCACAGACGAGGAAGCTCAGTCCCT[T/C]AATAAGCTGTAAAACATCCACTTAATCTCT
>A01_348685
TTTTTAAATTTAGAAAGTAAAAATCTTTTT[C/T]TTTGGTAAAATGTTAGAAAGTAAAAAACCT
>A01_348891
AATCTAATGAAGAGATCTTTGAATGTGTTT[T/A]AATTTAGAAAGTAAAAAATCTTTCCACACC
>A01_349590
GAATCATGAGATTTTGTTTGAACAGCCTGC[A/G]GGAGGACAGAGCAACATACTGTTTAGTGAA
>A01_350488
AAAAATAATAAGGAGGCATTTCTTTCTGTT[T/A]ATAGCGTATAAATTAGGAAGATAATCAACA
>A01_350542
ATCAACAGCTAATACATAGAGAGAGAGAGA[G/A]AGAGGGGTGACTCATTTAGTGGTGTAACAT
>A01_351081
TGTGAATCCTGATGATGGTGAAGATGATGG[T/C]TTGGAGAAGAAGCCGATGGTTAAAGAGGAG
>A01_351116
AGAAGAAGCCGATGGTTAAAGAGGAGCCAA[C/T]AATAATAGTACAAGCAATTATTTTACCTGA
>A01_351159
AGCAATTATTTTACCTGAAATTTCAGATCC[C/T]TCTTTACTGTTAAAAGAGCAGTCGAGGCGT
>A01_351219
TTCCCTTTATACTTCACTTCCTGCTCTTGT[C/T]CAAGGCAGGAAATGGGTAATGCTTTACAGG
>A01_351255
CAGGAAATGGGTAATGCTTTACAGGTCAGA[A/T]ACTAAACACACATTCATAGTTTGCTTCTCT
>A01_351535
TTCGGTGTTTGGTGGTCTTGTCGAGGCACC[A/T]TTGATTCCAACTGATAATAAGTATCAGGTT
>A01_351702
GTTTTCACTGATAAGTCTGGACAACCCACA[A/G]TATACCATTCCACAGGTATTGTTATTACCT
>A01_351846
CGGTTTTACACTTTATGCTCCAAAGACTTT[C/T]TAGCTCTCGGCGGTGGTGGACGGTTTGCTC
>A01_352267
AAAAATGGAAGTAACAAGTGCAGTTTCTTT[A/T]TGTAATGTTTGTTTTCTTTATCTTATAAGT
>A01_352411
TTTTGAATAACTGTTTCTGAAAAGGAGACA[T/G]CAAGTGTGGGTATGAAGTTCTTGTATTGTA
>A01_352771
TTTGTTTAGAGTTTGCCCATTAAGACTTCC[T/G]TCGGCCCATTAATACTAATCAGCCCATTAA
>A01_353244
AGTGAAAGGATCTAGCTTTGTGGAGGAGGA[A/G]GATGATAAGAAGAGTCACTGGCTTGATCAG
>A01_353292
CTGGCTTGATCAGAAGGAGAAGAGGGAAGT[C/T]GGTGGGTATGGTAATGGTAAAGGTCGTCGC
>A01_355327
GTTCTGAGTCTTCTGACAGTTGAGTTGGGC[A/G]TCGATGAACATCTGGTTTTTAGAAGGAAGC
>A01_355645
AGCAAGAAGAGGAGACACATCTGCATCCCA[C/A]AAAAGGAGAAAGGTCGTTTCACTCATTAGT
>A01_358096
GAGTTTATATGTCTCTATTTTTCTAGGGAT[G/T]ATTTATTTGTTTGTATTTTTGTTTTTTAAC
>A01_358352
AAACATAATATGTAACTCAAGTAAATTCAA[T/C]ATAATGTATATTATTATTCCTGGATTATTT
>A01_358425
TACATGGCCTTTCAAAGTTTACAGGTTTCA[C/G]TTTAAATAAAAACATTTCCAATTTAAAAAC
>A01_358528
CAAAAAGAGTAACTGTCAAAGGAATTGTTG[G/A]CTTTTAAGTCCCAAACATATACCATTACTA
>A01_358938
CTTCTTGTAGCGGCCTAGCTGTTCCATGTA[T/C]TTGAACCGTTTTAGATGGATGACTAAGATG
>A01_359112
CTAAGAAGAAACAACGTGTTACCTGCAGCA[T/C]TTGTCACAGAAAAACTTGTCTTCAGAGTGA
>A01_359145
GTCACAGAAAAACTTGTCTTCAGAGTGAAG[A/C]GTCTCTGTGGAGCTGAAGTTTTTCAAACAG
>A01_361165
TGATTTTCTTTTCAATATTTTGTACAGTTA[A/G]ACAGATTAATTTGAACAAGAACAAAACTCT
>A01_362065
TCTTGCTCTGTTTTTGGTCAGAAACGAATG[T/A]GAAAGAGGAGAGAATCAACGGAGAAAAGAA
>A01_362505
TGGCGTCATTTGTATAGCTAGTTTGATTTC[C/T]CCTTACCGGAGAGACAGAGATGAGTGCCGG
>A01_362582
GAGATTTCGTGGAGGTACGTTAACGTTGGT[A/G]TACCTTATTATAGTCTGGTCCGTTGTTATG
>A01_362787
CGGTAAAATCAAAGGTACTACATACAACTA[C/T]TACTTTTCGAAAACATTGACCTGTTGACCT
>A01_362925
CTGTAATAACTTTGAGACTGTTTAGTGCTG[A/C]AATTAATATTTCCCATAGGATATTCATTGT
>A01_363392
TACATGATTGCTTGCTCTATCTGGTTTACT[C/T]AAAAGCCTGAGACCTGACTTCCTCTCGCTT
>A01_363851
TAAATGGTCAAAACGATATCAGATTAAAAA[T/A]TTTCTTAATTCTGAAAATGTCTTAATTCTA
>A01_364002
GTGTTTGAAGATAATATAAAATGCTAAAAA[T/A]TATAAATTATTTATCATTTATATATTAATC
>A01_364330
CATGACCATGAATTTGGTTTCAGTGAACGA[C/A]GTGAATTATCTTGGTTTTCAGCGTCACGTG
>A01_364364
AATTATCTTGGTTTTCAGCGTCACGTGATT[C/A]GAATGCGAATCTTGTAGGGATAGAGTAACG
>A01_364439
AAACAACCATGAGTCAAAGTGATTAGAAGT[T/C]TTTTAGGTTCAAAAAAAAATTATGGTGCAA
>A01_365059
AACTTATTTATGGAAATAATTCAGCAAACC[A/C]TAAGAAATTCTGGCTCGGGTCCTATTTACA
>A01_365091
AAGAAATTCTGGCTCGGGTCCTATTTACAA[G/T]TATACACCAAAATCTTGGAAAACAACAAAA
>A01_365388
ATATATTGATTTCATTTAGTCAAAAAAAAA[T/A]TGATTTCATTCAATTAATGATGTAAAGAAT
>A01_365796
ATCCCATTTATGTGGTTTAGAGTTTAAACC[C/T]TAGTTACCCTTTTCCGCCGAAAAAAATCTT
>A01_365967
ATTTTCTTAAACTAGTTAAAGCAGCTTGCG[T/A]TCTTTGAGTAGGCTAAATAGTTTTTTAAAC
>A01_366213
GTAACAGAAAGAAAAAAAACATTTTACTTT[C/A]CAAAATTACCATAAATTTAAGGAAATATTT
>A01_366993
TCGCTCGTTTTAATTAGGTATGGTCATGGA[C/T]TAAAAAATATATCTGATATTTCAAGTGTAA
>A01_368649
TCCAAGCAATTTTTGCCAGACCTCTCTTGT[T/C]GATATTTCCAGACCAAAGGAATCTGGAACA
>A01_373789
ATTACCAAACATTCTATTAAAATATAGATA[T/A]TTTGAAACGTTGGAATCGTATAAGTTTTCA
>A01_376754
CTCAGACAACATCTTCGTCGCTTCGAAGCT[A/G]ATTCAATCCTACGCTTCCTTCGGCAAACCA
>A01_376997
GGAGCTCACGTGGCACCACGTTGGGTGTTT[C/A]GTTCACGGATTGGTTTTGAAACACGGAGGC
>A01_377108
GTGTGGGTTTTTAGAAGATGCGCGTAATGT[C/G]TTCGACGAAATGCCTGAGAGAGATGTGTTC
>A01_377945
GTTGCATTGCTATGCTGTCAAGACTAGCTT[T/G]GATCTCGCCACTTCAGTGGTGAACTCCCTC
>A01_378754
TAAGAATGGCAGAGCTTGCGGTTGGTAGTG[T/A]TCCGGGGAACGATGGTTATTATATAATGCT
>A01_378901
CTGGACATAGTGTAGTCTATTAGTGAATCT[C/T]TTAAAACAAAATGCGAATAATCATCCTGTA
>A01_378967
AGGATCTATCACATTTAATCGGACATTGAC[T/C]CGACATTAAATTTTAATCTAATTTTAAATA
>A01_379491
CGTCTCACTCGGGTTGTGATGAGTAATTTT[C/G]TTTAATTTGATTAAACCGATTCAGTTGATA
>A01_379710
TTCTCTTCTCCCGTCGTCACCCATTCGATA[G/A]CGGTAAGATTCAGCTTCTTTCTCCTTCCTC
>A01_380062
TAAAGAAAGTGGACTTGTTGCTAGGTTTAT[T/C]TAGAAAAGACTTGTTTGTGTTTGCAGGGGA
>A01_380210
TTACTATCCAACCAGATTGGAATCTCACCA[A/T]GACAAGTAAGAGTCTTTAACTTTTACCATA
>A01_380771
TACAACAACCATGTGTAGCTTTCATCAACG[G/A]TTCCATTTGAGCTTTCATTTGTTCTGCTTT
>A01_380827
GCTTTTGAGTTGTGCCTTTTCAAAATTCAA[C/G]CAAAGGATAATTGTTTTCTCCTCTCCACCT
>A01_381947
TGCTGTTATTGAAGTGATTCCTGATCCGAT[C/A]TTGAAGAGGGATGATACTAATATATTGTAT
>A01_382019
ATCGTATGTGGATGCGATCTTGGGGACGAC[T/G]TTGAAGGTTCCGACGGTTGATGGGACGGTG
>A01_385111
AGAGTTACTATATATATTTTTTTGTTTTTA[C/G]ATTTATCGTCATCTAGTTTTATAATGGATC
>A01_385855
AAATTTAATAATTAACAAACTTATTGAAAT[T/A]TATTTTCATTCGTAAAGTATAAAAGTATAT
>A01_386383
CTCGTCACGGCCCCCCACGCGGCGGATCCG[G/T]CCCGAAACGCCGCCGTTTCAGTCAAGGAAT
>A01_386658
CGCAGAGAGCTTCAAGGAGTTCAATGCGAC[T/C]AACATCAGAGACACCTTCAGGGTTCTCCTT
>A01_387121
CAGGTAAGTTGTTGAAAGAACAGAGAGATT[C/A]CTCTGTTTCAGACTCTGAATGGTTATCTTG
>A01_388429
AACCTCGTTACTCAACAAGGCCCATTAGCT[T/C]AGTTGGTTAGAGCGTCGTGCTAATAACGCG
>A01_389615
GTTTAGATTAGTCATTGTGTATGTTAGCAA[T/G]TGGTGTAGGTTAGCAGTTAGTTGTAGTGTA
>A01_389935
TATTCCCACCGAGGACGCCAAAGAGTTTGC[G/T]GAGAAGGAAGGTCTTTTCTTCCTCGAGACG
>A01_390015
ATGTGGAGAACTCCTTCAACACTCTGATGA[T/C]GGAGATCTTCAACACGGTTAACAAGAAGAG
>A01_390064
TAACAAGAAGAGTCTCTCGTCTGCTGAGTC[A/G]AATAACCCTGGTTCTTTGGCTGGTAAGAAG
>A01_390199
TTTTACAAAAGCAAAATTCATTTGTCCGGT[G/T]TCCCCCTTTGAACTATGGTTTGATAGAGAA
>A01_391595
ACCTTCCATTTCTTAAGACCTGGTCTTCGG[A/C]TAAGTTCAAGAAGCTTATCTGAGACATCTA
>A01_391658
AGCTCAACAGAGAGCATCCACATCTCCTCA[A/G]AATCTGGATTTATACTGATTTATACAACAC
>A01_392678
ATAAAAAAAAAAACATTGAAAACAAGAGGG[T/G]AAAATTGTATATTTGCCAAGGATTGATAGG
>A01_392755
CATAAGTGTAAAAGTCAAATAGAACCTAAC[T/C]TCTCTAACGATCATTCAAATAGACAGGATG
>A01_392939
CAAATGGAACCTAACCTCTCTAACAATCAA[G/T]TAAATGACAGGACGCTAGTTTCTAATTGTT
>A01_393411
ATTTTCAATCAAAGTAAATATAGAATATTT[G/T]CCAAGAACTGATAGAAATAACAAAGTGATC
>A01_393457
AATAACAAAGTGATCTCATAAGTGTAAAAG[T/C]CAAATGGAACATAAGCTCTAACTATCAATC
>A01_393737
TTCACCTTAACTCTTTGCTGCAGAGAAACA[A/G]AACACCAACCAAACAGTCAGGACTCACTCA
>A01_394198
GCCTTTTCTTAAATTATTTAGTTACGTTTC[G/A]ACATTAATCTAGAGTCTTTTGGTTGCCTTT
>A01_394409
GCTTATATTTCTAGGGATACTCTAATTATA[T/A]TTTAAATTCTGAAAAATGCATTTTTTTTTT
>A01_396015
GTCTCTCTGCACTTTTGGAACATCTTTGTA[A/G]GATCTATACCAGCCACCTCTATCATGCACC
>A01_396053
ACCAGCCACCTCTATCATGCACCTGAATCC[C/A]CACATACACAAGCATGAGTGAACACTTATG
>A01_396128
AACACATAGACACATTACGTTTACCTTCCA[T/C]TTCTTAAGACCTGGTCTACGGATAAGTTCA
>A01_396676
TCGCATAAGACACGATCAAACAGAAGCTGA[T/C]CAATGGACAAGGCTCTCTTAGAGTTGCAGT
>A01_396714
CAAGGCTCTCTTAGAGTTGCAGTTTGGGAA[A/G]TGTTGACCTTCATTGTTAGTAACTATCAAG
>A01_396756
ATTGTTAGTAACTATCAAGTTGGTCGTACA[G/C]GTTCTCTTAGTTTGGTGAATAAGAAGGTTA
>A01_397206
TGAGCATACCATGCTAACAGCTTCTTGCCT[G/C]GTCATGTTCCCAACTTCAGTTTCCAACTTC
>A01_397304
CGAGTAAGCATTATGAAAATGAAGATTTTG[C/T]TATTGAAGCCAACATGGATTAAAACAAAAA
>A01_397730
AGGCAACGGCTTACGAAGAATCTCAATGAA[C/T]GAATCCCACTCCTCTGCTCTCACTATCCTT
>A01_397994
CGGCCTCTGTGTCGTCTTCCTCTTCCCATG[G/A]TTGTTGACTCCGTCGCCGAGTTTCTGTGTA
>A01_398723
ACGTACATACACATGCAATATGGATATGAA[T/A]TCATAGAGCACATACGAAATCACCATTCTT
>A01_399821
TGTCAATTATACCTTCTGATGTTCTGATCA[G/A]TGAAGATGAGCTAAATTATGTGTAACAATA
>A01_400799
CAAGTTATTTTGTTTTCTGGTTTATGAGTT[C/T]TCTGGACAACGCTGGATTATAGACCAGACC
>A01_400861
GACTATGAACAATACCTCTTTGAATCTGAT[T/G]ATATTGGGGTGCTTCAAGTCTCTATGATTT
>A01_403900
ATAGCATCACCCAACTCCTCTTCCTTGTCC[C/A]GCAAGGCATCTTTCAAATTCGAATTCTCAG
>A01_405640
AAGAAAAAACCAACAAACCATCATTCATCA[T/A]TGTTTTAGAGTCTTACTAATACCAAAGGCC
>A01_405744
AGAACAACAAACCCCAACATTCACATAATA[C/G]GACCCAACGAAACGACAACCAACACTTAAG
>A01_406034
CAATAGTGGAACAAGCACAGTTACCTTGAA[G/A]TCCTGAGCAATCTCACGAACAAGCCTCTGG
>A01_406132
GGTACTTACGGATCTCACTGTCAACAAGAA[T/C]CAAAGATCAATCACAAAACCAATTACATAT
>A01_407547
TGAAGCGGAGAAGCATCCTAAACCGGAAGT[C/T]GTTGTTAGCTCGAAGAAGAAGTCATCTAAA
>A01_408961
ACAAACCATCCTGAGAAGAGAGAAGGAAAA[G/T]AGACTAGTAAATTATTACCTGGGTTCTAAT
>A01_409014
GTTCTAATCTTTTACAAAGAACAACACAAA[G/A]CTAAAGAATCATCAAAACTAGAAAGAAAAA
>A01_409214
CTCATAGGTTTCTCTAGTTTTTATGTCTTG[C/T]TGAAGTGGAAAGATTTGGCAACACCCAAGT
>A01_409454
GCCTTGTCTGGTTCTGATTCCCAAAACTTT[T/G]AAAAAATAAGACTCACCTGAGAATCAGCCG
>A01_409611
TATGCTCTCTGCTTCATCATAAACCTCCTG[A/C]AGATATGTGATCAAGATGGTAAGAAGCAAT
>A01_410473
ATATATCAGCATCACACACTCTGGAGAGAG[T/C]TCATCACAGATCATCGCCAAGACCTGAACA
>A01_411906
TTCCATTTTTATTTTATTTCCTCCTTTTAG[G/T]TCTTCACCTTTACAAAAGCAGTTGAAAAAA
>A01_412195
GAAAAAAAAATTAAACTAACTAAAAAGTCC[A/T]TAGTAGACAAAAATATTTTTTTTTTATTTG
>A01_412598
CCGTGTGTTGTGTAATCATGGTAAGCAGGA[A/C]GAGCTGGCATCAACGCAAAATATGTACTCG
>A01_413119
TTTTTAATATTGGTCACTAGTTTTTTTTTA[C/T]TTTCCGGGTGTTGTTCCAAATTCAGCTAAT
>A01_413305
ATTTTTTCAAGGGTTGAGTTTGATTTAATA[T/C]CATTGCATAAATGAATAAAAACTGCTTAAG
>A01_413429
AAAAAAGAGAGTTCGTAGAAAATGAGAGTA[C/A]AGTATGTATATTTTATACTAAAACGAGTAT
>A01_413868
CCAAGCTAATAAATCATTAAAAATAGTAAT[A/C]ATTTTAAAATCCTCACCCAGCGCTATATAA
>A01_414304
GTGATAACGAGGAAAGAAAGAAAAAAAAGA[A/G]TGAAAGTTCAGCTAGCACTAAAGTAAACCT
>A01_414831
ACCGCTCTCTCGTGGCTTCCCCTGAGCTCT[A/T]CAAGATTCGCTCGCAGCTAGGTTACAGCTG
>A01_418420
GGATCCAAATCTCACTTTCTATAGCTCTAT[T/A]CACACAGTCACAAAGACAAACACACATTAT
>A01_419681
ATGATGATGATAGCATTCCACAAGCCAATC[C/T]TATGTTTTAACTAGTATTTTTTTAATCATC
>A01_422971
TCAACGTGAGAGAGGGAAACCTTTTTTACT[T/C]GTCTGTACGTACTTTTGTACCAAGCAATGT
>A01_423086
GAGGATTATCCTTTTAATTGAAGCCCAGTT[A/T]TGTAGCAGGTTTGGCATGCTACAGATTAGG
>A01_423385
AAAATATCTGAATGAAAAATGAAAAATATT[T/A]TAAAACTCTTTTAGATTATACAAGAGCCAA
>A01_425734
GACAAAGCTTCTCAAGGCAAAGCTGCTCTC[C/G]TCTCCTCAAACCCAACAAGCAAATCCCTCT
>A01_426397
GATTCCGGATGTACCCTTCTGTGGAGGCAA[A/T]TCTCTAGCCGACAAGATCATTCGTTTGGTA
>A01_426777
CTGTTCGGTTTTCTTCCGGTAGATTTTCGA[G/A]TGTTGATCGGTTTAATTATCCAGTTTCTAG
>A01_426972
CAATAGAGAAAAAGAAAGTTATATTTTGAT[C/T]ACTATTTTCAGAAAATATTCTAATGCAGCC
>A01_427477
AAACGACAGCGTACAAGGCTCCGGCAATGA[T/C]AGTGCTCACAAGGAAAGCTTTGTTAGTCAA
>A01_428122
TATTTGTTTATTGATTTGGAATTTCAAAAG[T/G]AGTGTTTACCAAGTCTCTTGATTTGGGAAG
>A01_428360
TGGCTTTTCTTAAGCTTATATATACCATGT[G/A]TCGTGACGTTTGGCGGCTTGAAACATGGAA
>A01_428544
TATCTTTTGTTTATGTTAAGAGTCAATTCC[A/G]CGCGCAATTACTTGGTTCCCACTAAGGCTA
>A01_428818
CATGTGCATACTATATGCTTAATTAGTGCA[T/G]TGTATCTTATTTAACCACTTAGTAGTGTCC
>A01_428867
TTAGTAGTGTCCCGTTACATCAACTTAAAT[A/C]GGTTAGACCTTCGACAAGTACAGTCAAACC
>A01_429178
CCTTTTCTAAGTATTCTCCAAATCATGTTT[C/A]TTGATAATGGAAAGAAACTAGTTGGATTCT
>A01_429211
GATAATGGAAAGAAACTAGTTGGATTCTAG[G/C]ATTTAATATTTTGTTTTAATGATAGCTTAG
>A01_429432
TCCTCTTTGTGATCTCAGTATTGGCATTTC[A/C]TTCCATCCTTATGCTTATGTTGACCTCTAA
>A01_429979
AAATTATACATACACAAAAGAGAAGTGATG[G/A]GGTTTGACATTAGAAGATTTTGATGTTAAC
>A01_430314
TGGTAATATTAACTAAAAAAAAAATCTCAA[A/T]GCAACATTTAAGAAAATGTATAGTTGGCTA
>A01_430818
GTCCATGAATCAACGGTAGATAGGAACTCT[C/T]ACCCTTATTTCTTGTTTAATTAAAGTAAAT
>A01_430874
TAAATAATATAGTCTTTTTTTGCATCAAAT[T/C]GTAGTTTAATGATTGGATCATGAAACTTGT
>A01_431277
ATGGTGGTTGTTAGGTGGTAAGAAGGAGAA[G/A]GAGACCGAAGCTCGAGGGAAAGGAAAGGTT
>A01_432066
GATGAAGGGTATTTGTTTATACTGATCCCT[G/C]AAAAAGAAGAAAAAGAGTTTAAAAATTAAT
>A01_432129
GTGGGATTGGAAAAGCTATTGAAGAAGAGG[C/G]AGCTTTAAGGTTCATATTAAGTTGATGAAA
>A01_432276
ATTGGATTGGAGGAAGAAGAAGCAGTAATG[C/T]TAAAGTTTGATATCAAGATTTGATGGTGTG
>A01_432365
AAAATTCATGTAAAAAGTCTTCAATGTAAA[T/C]AGAGTGATGTACATATACTCCAATGTTGTC
>A01_433049
AGCAAAAAGGAAGAAGAAGCTAGAACTGAA[C/G]TTAAAAAGCTCAGTTCACACTTCATAAGTA
>A01_433124
TCTCTCTTACTACTTGAGAATATCTAGAAA[A/C]AATGGAGTCCGGGTCGGGTTTGGATCCGAG
>A01_433252
TTACCGAGAAAGGAGCTGAACCCGGTAGAG[C/T]TAAGATCTTGGGCCAAGAAAACCGGTTTTG
>A01_433533
ACCGTTGGAGAATGAAGGAGGGAAGATCAG[C/T]AGAGATTTGGAGAATGGGTGTTACTATCCA
>A01_435157
ACCAAGCTCTAACATATTAATAAACGAATG[T/C]AAGAAACACGCGTACACCATGAAGCATTGC
>A01_435361
TATAATCATTCCTCTTTTGGTAACATGTGT[A/C]TGCCACCACTGCTGCTAAAATGTGTACACT
>A01_435747
GGCTCTAGGTCTATCGAATCTCCGGTACAC[A/T]CAAACAGCGAGTTTTAGGAACATAACCATA
>A01_436041
GGAAGAGAGGGGAGTCTATGTGTGGTCACG[A/T]GCTGAGGACATGGAGTTGGACCCTGCAATG
>A01_436467
CATGATCATGTGAAACGCATCGAATTTAAC[C/T]GGTGGTGAGTTCCATTGGAAATGCTTCTGA
>A01_436829
ACACTTACCAGGAACACAACCGTAATGGAT[G/T]GAGTCAGTAATACGAGCACTGTTAACCTGA
>A01_436990
CAGTGTCGTTCTCCCACACACGTGCGAGTA[C/T]CACACGTATCTTTGAGTTCCTATGACCAGC
>A01_437054
AAACCCAAGCGTCGTCCTGTAACACCATTT[T/C]AACATTATTAGTAACCATTGACTATGCAAA
>A01_437258
AGGAATGAAACCAACATTGTAGCTCGGCGA[G/A]CACACAACTCTAATCGTGTTCTTGATCATA
>A01_437297
TCTAATCGTGTTCTTGATCATAACCGGAGA[T/C]CCCTCGAAGGCTCTAACGCCAACGTCGTGG
>A01_437444
CACAGTCATATTCTCATACGATGTTCCCTG[G/C]CAAAATAAAAAATAAAGCATCAAATAAAGA
>A01_437503
GAATTCAAACTTTATAAAAAAGTAAAGATT[A/C]TTACTTTGCCACGCATCTTGTGAGGAGAGA
>A01_437574
GAAGAGATCTGCTTCCTCTGGATCTAACGT[G/A]CGGAACCGACTCTCTCTGATGTTTTTGAAG
>A01_438217
TCTTTGTGGTTTAGATGTATATGTTTGCTG[T/A]GATTTGTTAATACTTGTACTTTTAAGTGTT
>A01_438492
CTACGGGATCCGTGTTTTTTTACCACTTAA[G/A]GTGTCCCGAATGGCGAGAATCTATTTTTTA
>A01_443345
GATCAAGTCTTTTAACATTTTAATTCGATT[C/A]TTTTTCTGCAGGAACATAGATAAGTCAACC
>A01_444227
AGACTGAGCAAACTCTAAGGAAAGTCTGGA[A/G]ACTGGTTTCTGAGTAGCTGGATGGCCAGCC
>A01_444470
TTCTCATTAGAGATTCATATAAATAACAAT[C/T]TGGTATTTGAATTAATTATTTATACCCAAT
>A01_445103
TCTGTGAGATCATCGGAATGGTTTATCTGA[A/G]TATGGGTTCGGGGTGACGAAGCTCGGAGCT
>A01_446123
CATCTAGCTTCTGCAAGCTAGCTACAACAT[T/G]TAGAGACTAATAATGGTAATGACATTGAGA
>A01_446153
TTAGAGACTAATAATGGTAATGACATTGAG[A/C]ATTAATAGAATGAACTAGGGCATAGAATTA
>A01_446205
ATAGAATTATTAGGATTATAGTACCAACTT[C/T]CTAAATTACCCTCACGTTCACCATTGTTTT
>A01_446651
GTTTCTGGTTGAGCCACCGATGGGTACGTT[A/T]CGGAGGGATCCGCCACGTGTCCAGTAACGG
>A01_446702
CCAGTAACGGCGACAGTTTTTGCAGTAGTG[G/A]CGTGGCTGAGATAAGCTGTAGTTGTTGTAG
>A01_447426
ATAGTTGTGAAGTTACTTCTATCCACCTCA[C/T]TGGTTAACTTATCTATCACGATTAGATTTG
>A01_447502
TGTCAAAGAGATATTGAGGCTGATCTTCCA[A/T]TGATAAATTCACCATATAACATCATTCTAA
>A01_449111
TTGTTTAGTTTTAGTTTCCTTGAAACTAAG[C/T]TATTATATTTATTATACGGATAAAGACCTT
>A01_449340
AGTCTGTACGCCAGAGCAACTGGGAGCGTT[A/G]AGGACGGCCTATTTCCCATTTTATTTGTAT
>A01_449446
CAAAGCTACTATGATTGATTGTATCCGTAG[C/T]TCTGTACTGTGTGCTGGTTCTCGCGGTTTA
>A01_449581
TTCTCAAATTACGATAAAAAATTAATAAAT[T/A]TATTTTAAAATAATGTTTAAAGCCCCTGAA
>A01_449648
GATACGGCCTTGTGTGGTCTATCGTTGAGC[T/A]ATGTCTTCCAATCGTATTTGCTTTGCTCCC
>A01_449690
TCGTATTTGCTTTGCTCCCAAATAGTTTCG[C/T]CCACACAGCATACTCCTAACTAAAACGTGT
>A01_450012
TTCAGGAAATTAATTAAGTTTTTAAGCTTT[A/G]TAACTAAGGAGTAGGCTTCAAAGTGTTGGC
>A01_450210
CTTTTATCCCTCCTGTCATACTTCCCACCA[G/C]CATCTTCTTCCCTATATATATACACATAAA
>A01_450304
CGTCATGAAAACATATATGTGCATGTGTGC[A/C]TGTCTGAAAAAGTAATCATGTGAGATCATG
>A01_450493
GATGAGTGGCAGATACTGTATCAATAATAC[C/T]ATCCATAGTCCCCATTGCATCCTTCATCTC
>A01_450863
ACCATAAGTCATGGTGTCATCGTAGTACTT[T/G]CCTCCGGACGTCATGATCATTTTTGGACAG
>A01_451240
AGAGGGTAAGTAGTAAATCCCCACTCGTTT[C/T]TGGCCATACATACATCAGTGTGGCAAATTC
>A01_451580
AATTATTGAGAAGTGTCCAGATAATGAGGA[G/C]AGACACAGGTTTAATATAGGAGAGCCTTGT
>A01_451675
TTTAAAGTTTATTATTGTTATCATGCATGT[T/G]GAACAAAACATGCTTACCGGGAGTTATATT
>A01_457799
ATTAGGTATAAGCAATAATTTCCTAACACT[T/A]TGGGATTGTGGAATATATGGGAATCATGAT
>A01_457912
AAAATCAAAATAGTATATTTAAAATATATC[A/C]AATTTATTTTAAACATCCTAGCTTTTGAAA
>A01_458055
GCTCCCATTTTTGAGACTATTTTATTAAAA[A/G]TCCAGACTAATAACATGTGAGTAAACATAG
>A01_458267
TGCAAAATTAATCATCTCTTGCGTCTCTTT[A/G]ATTCCTCCAATAGCACTTCCCGCAATCGAT
>A01_458746
TGTGACTTTACTCCCAAATGCTTTAGCAAA[C/T]CTCACCCCAATGTGACCGAGACCGCCTAGC
>A01_459254
AGCGTAACATTCGTCGACAACGATGTGATC[G/A]GAGTATCCACCGTAGTTAACAGTTCCATCG
>A01_459365
ATCTTCACGGCAGCTCTCGCACGCGCGGCA[T/C]GAATCTACTATGCATCCCACACCGATTTTA
>A01_459504
ACACGTTTTGTGTATATCTTACAGTGATAT[T/G]AAACATTGCATGTTATTGAAAGGACAATGT
>A01_460543
TATCACCAATACCCAATGTATACAATCGTA[C/T]GCTTTTGATTAGTAAAATGTAATCCAGGTT
>A01_460579
TGATTAGTAAAATGTAATCCAGGTTAAACT[A/T]AGCAATTCATAAAGAGAAACCAACAAAAGT
>A01_461136
TCTCTGCGCATATATCATCAGTAACATCTT[C/A]ATCATCATGGTTACAGTACTGATTTATCAG
>A01_461174
TGGTTACAGTACTGATTTATCAGTTATTAA[A/T]TATCATGTAACATCTTCATCAGTACTCATT
>A01_461356
CTCTCTAATTTCGACCAATTACTGGACCAA[A/C]TAACCAACCTATCTTTATTATATATAGGAA
>A01_461525
TTCATTTTTTTTACTTTTCATATATGTACT[C/T]CTAACCACATATTTAATAATATAAAATACT
>A01_461677
TACCGATCGCAATATCAAGACCTATTAAAC[T/C]GGTCATGAAAATAGGATTGGGTTTAGCTTC
>A01_462104
TTGGTAGACAGAAAACACTATGGAATGGAT[A/T]AATAAGTTTAGGCTTATCCGCTTATGGGCT
>A01_462141
TTTAGGCTTATCCGCTTATGGGCTTTAGGG[G/T]TTTTGGGCCATAAGACTAATAAGGGAAGTT
>A01_462513
ATGTAATATACTATATCAATGTAATATTAT[C/T]GATTAGTTGGATCGACTGAACTGGGACATC
>A01_462713
GTAAGGTGGTACAAAAAATATCCGAACCCG[A/T]AGTGTTATTAACCGAACCCGAACGGGTAAC
>A01_462753
AACCGAACCCGAACGGGTAACCAAAAAAAC[C/T]GAAAAAAACAAAAAAATCCAAAAAGATATA
>A01_462859
TATGAAACATGAATATATACTTCAAATATT[T/C]AATTTCATATTTATTTTGATATGGTATCTA
>A01_462991
ATTTTGCTTTTAGATTTTAGATTTTATTTC[G/A]GGTATATCCGAACCGATCCGATATAACCCG
>A01_463025
ATATCCGAACCGATCCGATATAACCCGAAT[C/T]CGAATGATATATGGTTACTTTATGGGTTCT
>A01_463461
TTAATTTAAATACAAGATGTTTCGATATTC[A/C]AAATTTGAAGTGGATATATATATATATATA
>A01_463591
AAACAAGAAATATATATATGCATATATTAT[G/C]ACATCTTCCAGAATTTTATTTTAAGTATCA
>A01_463675
GTTAACTCTTTTTCCAGCATATAAATATTG[T/A]ATAGGTAGGATTGCTCTGAAGGAAATCCAG
>A01_463912
TTTAAATCATGCTCTCACATTTCGTGGAGT[A/G]CTTTAAGAACTATGTAAGGAATCATTATTT
>A01_464015
TTCAACTAGTGTTACCGTTGATCTTGACTC[A/G]CAATATTTAATTATGGTGTATTCTTAAGTT
>A01_464822
TACAATCAGAGAATGTAAAAATGAAATAAT[G/C]GCCAACACCTTTGGAACATTTGGTACAATT
>A01_465058
TCTTTTCTTGGTCTGATCAATAATCTAAAT[C/A]AGGTTTATTATCATTCACACTATCACTCTG
>A01_465510
GTGACAAATAGCTAAGCTGTGTAAACTGTA[G/A]AGTTACAATTAGAATCACCTGAGAAAACTA
>A01_465556
CACCTGAGAAAACTATATATTAAATAAACA[T/A]AATAGGTATTTCATTATAGAATATACATAT
>A01_465622
TGCATGATTAATGAACATCTGATATTTGAA[G/C]AACAGGTTGTCAGTATGGGTGTGGTGATAA
>A01_466551
ACCAAGTTCATTGTGGTTTAGACTCGATTC[G/A]ACAAAACCTCGTATACTATTTCGTTTTTAA
>A01_466639
GTTTATATATTAAAGTTTTTTTTTGGGTGT[A/G]ATATATTACACAAAGCGAACTATTCTTTCG
>A01_467286
AGTATTTTTACAGAAAGGCATATGGGCTAT[T/A]TGTACTATGTATTTTGTTCGATCTACCTTC
>A01_468839
TCACAAGATTGAATGATTGGTGTGGAGAGG[G/A]GCTTAATTACTCAAAATCAATAAACTAGGA
>A01_471860
TTGTGGTTGTTGTTTCTTACAGTCTTCTTT[G/A]CCAAGTGAAGCTGTTGATGACAAGGAGAGA
>A01_471914
GGAGAGATCTCGTGTCACTGTAAGCTTTTG[T/C]TTCTTCCTTGCTCTCCTTAAAAACCCTTTT
>A01_472072
ACAGCTTAACGCATCTTTGGAGGAAGTTGA[G/T]CCTGAGATTGCTGACATCATTGAGCATGAG
>A01_472127
CATGAGAAAGCTAGACAATGGAAGGTTATT[T/A]ATTAGTCTCTCTTAATATCTTGTTCCTTCT
>A01_472216
AATGTTATCAAAGGGACTTGAACTCATTCC[A/G]TCTGAGAATTTCACATCTGTCTCGGTGATG
>A01_474552
CTATCTTATGGTATGTGAAAAATAATTGAA[C/T]TTTCAATATGGATGCAAGATTTCTTAATTT
>A01_474797
GGATTAACATGTTGTAATTCAATTATTTGT[C/A]TCTTCAGGTGTTACTATATCACACTTTTAT
>A01_474903
CCCAAAATTTTGTAAAACATTACAAAATAT[T/C]TTTTTATTTCACAAAGACAACCCTTGTCTC
>A01_475048
GGATAAGTTACTGTCTTACCCTCCCAGTAA[T/A]CCTCAAACCCTTCTTCTCCCTTTCTCTGCT
>A01_475146
CTCTCACCTTTGCTACTGACACTGTCATAA[C/G]CACCACTACCAGTAAGCTCATAAAGTTCTC
>A01_475191
AGCTCATAAAGTTCTCATCTTTTCTGCTTA[C/G]TTACCAAAAAGTTCTTTCCTTTAGGTTCCA
>A01_485102
GCTTCAGCTTCCCTAAAGGACCAGCGATGC[G/C]GAAGATAACGACGGGAGCTAAGAGGGGTAG
>A01_487789
GGCAGCTATGGAGTTGGAAACAGGATCAAG[G/C]TGGCGTATACTAGGAAGATCATCGATGCAA
>A01_495750
AGTTTCCAAACACTCCAATTTTGTACTTGA[G/A]TTTTAATAAGATAGATAATCGACTATCTAT
>A01_509211
GTGAATAATTCAAAAACATAAGGATAGTAT[G/A]GAAATTTTATTGATGAATAGTATGAACAAA
>A01_514816
ATTATTTTATCCGATTAGATCAAGGATCAA[G/T]GAGATATCGGAGATTAAAGAAAATATTACG
>A01_522126
ATATGTATATCCAAAACTATGTTTTTTGTG[T/G]TCTATTTTATATATATTATTTTATGATTTA
>A01_529296
CCAATATTCTGTGCTAATTTTTTTTTTTTT[G/A]AACTCATTTTTGTCATAAAATTAACAGTTA
>A01_536923
TGCAATTAAGATTTTTGAAATTTGAAATTA[T/G]TTAATAAAACATGCATTGAAAATGTAAAAA
>A01_551416
GGACACTTTGAACTTAGATTTGTCACATTA[G/A]GATTTCTAGAAGATATTTTAGGAAAATAGG
>A01_557052
GAATAAAATATTTTCTTTGTAAAAAAAAAA[A/G]GAACGATGCGGTTTAAATTACTGATATATG
>A01_557590
TTGGTCCGAATCAAAACATTTAATAGCTTG[C/A]CAAGAATTTTCTTCGGCTGGAGGCACGCAT
>A01_569083
CCGATCCGAGCTTGCCACCTTCCATGCTGG[C/T]GATGTCTATTTTAACAGAAACACGAAGTCA
>A01_570139
GAGTTTGGTTTTGGTGGTGATGAGAGGCAG[G/T]GATGCAGCTAGATTGTGACCCAGGGCTCAT
>A01_570221
AAATTCCCCATATACCCCTACATTAAAAGA[A/C]CCTCCTCCATGTGTCAAACCAGGGTCATTC
>A01_574516
TAAGAAAAATTAATCTTATGAAAATTAAGG[T/C]AAAAGTTATATTTTTGGTTACAACTGAAAA
>A01_576715
CAATGGCAAGGAACACTCTATAGCAGAGTA[G/A]AAAGTAATAATAGGCAAGGAACACTCTATC
>A01_582927
GAATATTAATTGCAGTTTGAAGATCGATTT[G/A]AAAGAAGCACATCCTGTGAACAAAAAAAAG
>A01_587493
CCAGCAGTCTTTGGGCCGATATGAGTAGTG[T/A]ACTATTGGCAGATTGATTGTATCTATTTAG
>A01_587616
TTAAATTTTTATGTTGGCTGGTTCAATACT[A/T]TAGCGCTTTATTAACTTAATAAAACAAATA
>A01_587928
TCCTAAGCTTTCATATACATAGAGAGAGAT[A/T]TTTTTTTCTTTGATCTTAATGTTCTAGATT
>A01_592852
AAGCAACCCCATCAAAACCTCATAACCCGT[T/C]GTGTGAAGCGCCTCAGGCTGGTCCCAAAAG
>A01_592906
CCAAAAGATGATCAGCTTGTGAAGTATCGG[A/T]GCAGCTCCAGAGAATCCCATTCCAAAGAAA
>A01_593574
ATTCACATAAAACATTATATAACATAAAAA[A/C]GGTACCGTCAACTACCCTAAAAACATTATT
>A01_593613
CAACTACCCTAAAAACATTATTATGTGTCC[A/G]AACTATATAAGTTCACATAAAACACTATAT
>A01_593935
AGGTAAACGGTGCTGAAGCGAGTGAAGATC[C/A]ACAACGCTGGGGACTTTGGTAGCTGTGTAT
>A01_594600
ATCTTTTGATCACCACGAGCAAGAGAAGAG[G/A]GAGAAAGAATGAAAGTAAATAAAAATAGAT
>A01_595138
GTGAAGTGTTTCAGCAAAAAAAAAAAGCAT[A/G]CATAGTGAATTTGTCTATGTATGATTTTGC
>A01_595651
AATGGGTTTAAGGGGATGTATTCAGTTTTG[C/A]CATTAAAACATTCCTTAAAGCCCACCTTGG
>A01_596657
TGGGTCATGGGTGAGTTGCAGGACGCGAGG[C/G]TACATATGTGGGACGTTACAGAGTAACGGA
>A01_596916
TTCATTATATTCGGTTTCTATGACTGATTG[T/A]CTTGTTGTTGATGTGGTGCAGAGAAGAGGT
>A01_597477
CGGAAACCACACTCCAATCTTTCAGAACGG[T/C]GTTGGGTTTGAGAATGGGAACGGACTGTGG
>A01_597585
CTTAAATGGGTATCTCTCTGAGTTGGCTGC[T/A]GCTGCTTTTGTCTGCAGAGTGAGTGTTTAA
>A01_597756
TCTGTTGCTCGAACTTTTCAAAAGAGATGG[G/A]ATGGGGACTATGGTTGCTAGGTATACATAC
>A01_597799
GTTGCTAGGTATACATACGCATTTGTTTTT[A/T]GGTCTTTCTCGTTCTTACAGTGTTGTTAAG
>A01_597871
CATTGTCCGCAGTGATGTGTACGAAGGAAC[C/A]AGAGATGCCAAAGTGGATGATCTTGCAGGC
>A01_597943
CATCAAACCCTTGGAGGAATCTGGGATTCT[G/C]GTTCGCAGAACCGATGAGGAGGTTTAAACC
>A01_598024
TCTCAGTCTGTTGTTATTGATTTGATCTTT[G/A]AGTGCAGTTACTGCGAGCTTTGGAATCGTT
>A01_599275
TGTCCCTTTAACTCTTTTATAAAGCAAAAG[A/T]TGAAGATGCATTATTAAAAAGCCAATAATA
>A01_599739
TGGAGTGATGAACAAACAAAAAATAGATTA[C/T]TCCATTTATGGAGTAAATTTCATTATGGAG
>A01_599848
ACTCTATTTTAGAGGAAAAAATAGAATAGG[G/A]ATGGAGATGACCTAAGTTTGTTTATAGTTA
>A01_600391
GCAATTTTCAAATTATGAACGCATTATCAT[T/C]AATAGTAAACTCTCAATCTTTAAACCCATC
>A01_601067
AAGACCTCGTCTGATTTAACATCGAGCTCG[A/T]TGAGATCAAATTCGGACAAATCTCCAACGT
>A01_601111
GGACAAATCTCCAACGTGGTGAATAATGTT[A/T]AATTTAAAAGGAACTCCCATGAGCCTAGCG
>A01_601518
AGCATCGTTCGCCTGAACCGGTCATGCGGT[A/T]GAAGAGAGCTTGGAGGAAGTAAGAAGCGAG
>A01_601563
GGAAGTAAGAAGCGAGTTTCTGCTCGGTAT[C/T]TCCGTATGGTGAAGAGAGCTCGTTGAGCGT
>A01_604105
TACCTTTCAATTTCCTCTCTTTGAATTTCC[C/G]ACCTGATGGTTTTATTATTATTAGCTATAT
>A01_605480
ATTTTGCATTGTCAGTGCTTAATTTTATGA[T/A]TTTTAAGATGTTTTTTTCTTCTTTTAATAT
>A01_606690
CCTGGAAAATGATTTTTTGTTTTTGTTTTT[C/T]AGAGCATATAAGATAATATAATTACATTTG
>A01_606795
AGTACATATGATTGTCTAAAGTAAATATAA[G/T]TACATATGATTGTATAAAGTAGAGATCCAA
>A01_606952
TAATTATTTGTATTATTTTATATGTCATTA[T/C]TAAAATCTCAAAAATCAAAAGATAAAAATC
>A01_607080
TGTCTTTAATTCCTAAGTATTTTCAATTGA[C/T]AAATTAAATACTCAAGTATTATATGCGCAT
>A01_607162
TGACTGTGCAAAATTATATTAGAATATTAA[A/G]CTGTTAAAAAGTTGACGGAAACAATTATTT
>A01_607208
CGGAAACAATTATTTTATGTTTATAAATTA[A/G]TGGTTGATTGTTTCGTTCTTAATTTTGTGC
>A01_607441
ACTTTTTATCCTGAAAAAGAACGTGTCATT[A/G]ACAAAATGAAAAATGAAAAGTTCAACCTTG
>A01_607643
AATTAAATATTCAAAAATAAAAGTAAAAAT[G/T]GATATAATTTTCAAAAGTGAGTGATACAGA
>A01_607790
ACGTGTTACACAGTTCACATTCCCGAGTTT[C/G]CACCATTAAATATACTATTTTCATTAATTT
>A01_608053
AAATTAACTTACCAATATCAGAATTCAATT[A/G]CAAAATCTTGTAAGTCCTCGTGTTATTTTT
>A01_609235
GAAACAGAAAGAGATACAGACATACACTCA[G/T]CTGTACGATGCAATGGAAGCTTTTGTTCAC
>A01_609857
AGACAAAGTCTCATGGTAATTGTAAAAGAT[C/A]TTTAGTAATATATAAGATAGATGAATCAAT
>A01_609988
CAGTCCAACCCGATCCACATCTATTCAGCC[T/C]AAAGTTGACCCTCGATCTTTGTCCGAACAT
>A01_610056
TTAATGCTCAAAGAGCCATCATCTCAGGGG[G/A]CGTATCAAAGATAAAGTTTCTCACATTAGT
>A01_611629
CTTTATCCAAGATAACTTTAATTTACTAGA[T/G]TATATACGGTAAATAAATATAATTTACATG
>A01_611843
TCCAAAAGAAAAAAGAAACAAACTAATCGG[C/T]ATCTTTAGCAAAAAAAAAATAAAAAAAATA
>A01_611977
CATCCTTACATATATTGCTTTTTTTTTTAT[T/C]AAACTACAATTGCATTGCAATAAAAGAGTT
>A01_612144
TCATTCTGCTGCTAAAGTGATAAACGTCGG[A/T]CATCCTTACATAAATTGCTAAGAAATGATA
>A01_612272
TTATAACTTTTATTTTGTTCAATCTTTATA[A/T]CTAAAATATAATATTCAAACACAAAGTAGT
>A01_612703
TACATCATATTATACTTTATTTACTCTTAA[C/G]AATGTGTCTTTTCTCTATCTAGTTTGAATG
>A01_613561
TGAAATGAAGCCCAAACGGTTTAAAAACCG[G/A]AGGTATCGAAGGGAGTTTCAAAAACGGCAG
>A01_613732
ATGACTCGGGCGGGTACTCGAGGAACTTAG[C/A]CGAACCGGGCCATGATCCAGACCCGGATCC
>A01_614618
AGTCTCAGCCACCTGTTACAGCCATAATAA[A/T]TTTTCCGTTATTAAATTTGTCATTTTTCTT
>A01_614804
TTGAAAAAGAAAATCAATTCATGGAAATGT[T/A]TTTATAAGATAAAAAATCGATTTTGTTTTG
>A01_614853
GATTTTGTTTTGTTTAAAAGAGAGTAGGAA[G/A]ACGGAATAACAGAAGAAGAAAAAAAAACAT
>A01_614900
AGAAAAAAAAACATATTGGAAGGCAATAGT[A/G]AATTACCAACATAAGAAAAGAAGGTGAATG
>A01_615265
ACGTGAGGTATAAGTAATGAACAGAGAAGC[A/T]ACAAGAGTATATAGGATTTGGATTTAAAAG
>A01_615300
GAGTATATAGGATTTGGATTTAAAAGGAAA[T/C]CGAAAAAGACTTACAAAAATAAATCGGCTA
>A01_616025
TGAGCAGGTTAATGGTGATTAAGACGAGCA[T/A]TGATGTCGAATACTTTTTTTTTTGAAAACT
>A01_616400
TTTCATTTATTCATGAACTTTTTTAATCAT[G/A]AATATTTTATAACTACATTCCATTTTTTCT
>A01_616702
TCATATCTGGATTATGCAACTATTTTTTAC[A/G]TCAATAACAAAAAAATATGATAATTTTATT
>A01_616960
TTTTTTTAACTCAAAATTTTATAATCTTTC[A/G]TAACGGAACACATCGTGGATTACAAAAACC
>A01_617256
ATTTCTCTCCTCTAAATATAGAGTCAAGAT[A/C]GCATTTTCGTATTATATTCATGTATATATT
>A01_617568
CTTTAAAATAGAAAAATATATTAAAAAATA[C/T]ATCTCTATTTTAAAATTATTATATTTTAGA
>A01_617701
AACATCATGTCGTCATCTCCATCAACTTTC[G/C]GAGATGATGTTCGGTATCTCACTACCAATA
>A01_618263
AAAACTATCATTCAACGTTTATTGTGTAAC[T/A]TTTGTGTTCTGTCTGCTCTGCCGCGAATTA
>A01_618320
ATTATGCATTTGTAATACATTGTACTATTT[C/G]AAACCTCGACAATAAAGCCACGTACGTAGA
>A01_618556
GTCAGACAATAATTTTTGTTTTACCGACTT[G/A]TGTCGGATAGTGTAAAATGACAATAACGTC
>A01_618611
AACGTCCTTTTGTGTATATTTATTTGTTGA[A/G]AAAATGTAAATCCCAGCTGCGAATGGCGAA
>A01_618778
CACCAAGATAAGATTATGTTGGTGTTGGCT[G/A]ATCCAGATCCTGAAACAAACTTACGAATTA
>A01_619124
ATGTGCTAACAATTCAAACTAAGTCTATAA[T/A]ACTATGTTAGTGTTAGTTGGAGCTATTTGG
>A01_619682
ATATATGGCTCAAACGAACCGATTCTAATT[T/C]TTTTTATGTTTATATTTTTTTTTCCGGATG
>A01_619914
AATAATTGGACTCTGTTAAGGATTTTTTTT[G/T]GGTCGAAATACTCTGTTAAGGTTTATTTCT
>A01_619958
TGTTAAGGTTTATTTCTTATTTGGGTGAAG[C/A]AAAAATAGTCAAAGGAACAAGATGGGACTT
>A01_620169
ATTATAAATTCAGAATTCGAATTTTCGGAG[A/T]CTATTAAAGCAACTCCAATAAGAGAGTATG
>A01_620283
TGGGGTTTTCAAATGGAAACTTACGAAAAA[C/T]CTATTAGAACTTTTTAATACCACGTATCTA
>A01_620568
TACTAGTTAATTAGTTGGATCCATATGAAG[C/T]AACTGTTATCGTGAGATACTATTAGACATT
>A01_620674
CATAGACGAAACAAATTCTGCTTTAAGCCG[T/G]TCGATTTATCTACTTTTTACCTTTTCGATA
>A01_620831
TAAATTTTGCACTGGCAGTCGTACACTCGT[A/C]TAGATGCCAAAATATTTGCAATGTAAATAA
>A01_621167
ACATGCCGTAACCATGTTAGCTCAAAATTT[G/C]GTTAAACAGTTGGAGAGATATACGGAAAAT
>A01_621310
TAAGTTTGCCCTTAAAGTAGCAACTACCTT[A/T]TGAACAACAAAGTTCTCGAGACAATTGAAA
>A01_621449
AACCTAATGAACCACCCAGTACGTAAGAAA[C/A]TAATTATTTTTGTAAGCGCAATCATCAATA
>A01_622649
GGGTATTGCAAGTGTAGCAAGTGCGTTTGG[A/T]GAATCGACTATCCCAGATATTCTCCCTTCA
>A01_622679
AGAATCGACTATCCCAGATATTCTCCCTTC[A/G]CATGGGCAACATGAGAGTAACAGGTATACC
>A01_623178
GAAAGAGATCTCACCATCACCTTGAGAGAA[A/G]TGCATGTCACCAGTGCTTAAGTTAGCTCCT
>A01_624038
AATGAACCTGCACACACAATCACCAATAAA[C/A]TTTTTATCTATATGCAAGGTCTACTTATGT
>A01_624362
AGCAACTTCTATTCTCTCTTTTCTTTTTTC[T/A]CTTGTAATGGGAAGAGAGGAATCATTGGTT
>A01_624469
ATGGCCTTTAACTTTCTTTCATCTTTGTGT[A/C]TGTGTGGCAATGCATCGATCACAATAAGTT
>A01_626046
TCCTTTAGCCTTTGGTAGGTTTGCTAGTGG[T/C]CTCTGATGAACAACCTCACATAGTGAAAAC
>A01_627062
TTTTCTCTGAACCAAGTGGATAGTATCGTA[A/C]GATACACGTGTGTGACGTGTTGATATCTCT
>A01_627204
GCATCTTTATACTTTTAAGTATTTTATCCA[C/T]ATTAATATAAATATTTTATTTTAATTTATT
>A01_627328
TGAAAATCTTCAAATGAAAATTCATCTCAT[C/T]TGCTAGTTTTCATTATTTTTTATTTGTTTA
>A01_627809
ATCAGATATGATCGGATCATTCGCATGGCT[A/T]ATAAAATAGTAGTATAATAGTGTGATTGCT
>A01_628944
TATTTATATTTTAAAAAATAATATATACTG[T/C]AACTTATACATCAAAAATGTTACCAATCAA
>A01_629631
AATTTTAAGTTGTCGTAGGTACGTAGAGTC[A/G]AATGTAATTACCAGTCAACATACAATAAAC
>A01_629883
AGCAATATGGTGGATTTATAAGATTAACAC[A/T]GTTATGGACAAGATTTCGGTTGTGTGTACG
>A01_630021
AAATAAAAATACAAACAACTAATTTACAAC[A/C]CTTCTACATTATTTTAGGGTTTTAGACACA
>A01_630329
TTTATCAACATAACCACAACACTTTGTCGT[T/C]TCTCTTGTTTCTTTTTTCTTTCTTTTTACA
>A01_630417
AGTTTCATAATCTTTTTTTTGTATCAATAA[T/C]GCCCTCCAAATGATTAAACACTAAAATGCA
>A01_630692
TCTATCAAATCCCAAATTCAGCTTTGTTCC[T/C]TTTCTTTATAGTACTTATTGAGTGAAAAGA
>A01_630837
TGCGGAGAAACGGAAACGCTCTCTTTTCCC[C/G]CAATGCCAATACCTTTGGAATCACTTCCCA
>A01_631580
TGGCCGTGCCGGTCTAATGTCTTTCATCTC[C/A]GCCGTTCCCGAACAAAACCGCCCTGGTACG
>A01_631642
TCAGTATTTCTATATTTCAGAATATAACAT[T/A]AAAAAATTAAAAGAAAAAAGAATATAACAT
>A01_631699
ACATGAAACATCATTAATACAAGACTATTA[T/G]GTTACAAGATTCGATTCCTTTTGTAATAAC
>A01_632141
CTCTAACCGGTCCGGTTGTCCCGGTTCCTT[T/G]TCTTCCACCGCCGCAGTTTAGTAAGGCGCT
>A01_632176
CCACCGCCGCAGTTTAGTAAGGCGCTTAAT[A/G]GGGATCATCCGGGAAGTCCATCGGAGGAGT
>A01_632298
GAGAAAGTTATTAAACCTTTTTGTTTAAAA[C/T]CGACGACGCAAACTCTTCGCACTCAGTTTT
>A01_632986
CTATACGAATAATCCTATATAGAATTGACA[A/C]TCGATTTGCTGAAGAAGCAAAACGATAAAT
>A01_633016
ATCGATTTGCTGAAGAAGCAAAACGATAAA[T/A]TCGGTACCCATGGATTCCAAATTTTCAGGT
>A01_634025
TATTTAGCTATTTCTGCTACAGTACGATAG[T/C]TATATCTTAAAATAAAATGGATAAAACTAT
>A01_634225
GGTTGCTTCCCTTCAACACTAGCCTTCATT[G/A]ATGATAGCCCATAAAACCTTCCTAGTTCCA
>A01_634373
TAATTTATATATTTGATGCTAAACATCATA[C/T]CAAGGCATAATTGTTCAGTGACAAACCATC
>A01_634529
CTCTCCCATATCCTAGCAAAAATGATGGCT[G/A]CAAATCTCTACGTACTTCTCCCAGATAGAA
>A01_635286
TGTTTGTTGCTTTTATTGGATAAGAGACAA[A/T]TCTGCTAGTGGGAAAGCGAATGATGTTAAT
>A01_635377
ATCTTCTAATTAAAAGTTTCACAATTGCTA[C/T]GGATGTTACCATCACGGCCGGTTTTAACAT
>A01_635413
TTACCATCACGGCCGGTTTTAACATCAAGG[G/C]GACCGAGCTTGATCATGGAGTTAACGAAAG
>A01_635579
GCAAATTTGATAGTATACGTTGTCAAATTT[C/T]CCCGGTGTTGTTGGATCCATAAATATCTCT
>A01_635689
AAGTAGCGTTTATACTCGGGTCTTCTTTGA[C/T]ACCGTGAATCCTATCCAAGACCTTGGTGCA
>A01_635876
GGTTGTGGCAGCATTCCCTCGACACTAGCC[G/A]CCGTGGAGGATAGTCCATCCAACCTCCCCA
>A01_635913
AGGATAGTCCATCCAACCTCCCCAATTCCA[T/C]GTCGTACCATGGTCCACCCACCTATATTAA
>A01_636189
TGAAATCAAACTTATTAATTAATAAAAAAA[A/C]CTTAAGCAAATATATGAAATAATTTGATAA
>A01_636572
TTGGGTTTAGGGTCAGAAAGAGAGAAAGAA[A/G]AAGTGATAAGAGATTCATTTTGTTCGTGGA
>A01_636965
TATTAAAGTAAAATTACAAGATGAATAAAC[G/C]GTTGCTACAAACCTGGCTTTAGAGCATGTT
>A01_637498
ATATGAATTATGAGATAAGGCAATACATAT[G/A]AATCAGATTTATTAAGACTAAGATTCTAAC
>A01_638014
TTTGTTAACTGTGGGGTCCACTTGCGTTGT[T/C]TTGTTGAAACTGTAAATCCTGTTGAACACT
>A01_638158
AATATGTTATTAATTAAATATTTTATTTAT[T/G]ATGAAATTACTTAAAATACTAATTTTTTAT
>A01_638673
CGGATGATCTTTCTCCGCCTTATTATTACC[G/A]GTCGATGCTATCATCACCGAGGCATCACAA
>A01_638714
TCATCACCGAGGCATCACAACCCTAAGACA[G/T]TAAATTAATTTCATAAGTTAGACCCAAAAG
>A01_639640
TCATAATTTTTTTACTAACCATACAATAGA[A/G]TTTTGGATCTTGTAGTCACCAAGTTAAACA
>A01_639694
TTAAACACGGATTAATTAGCTACATATCTA[G/T]GGAAGAAAGCTACACATTGTCCAAATCAGT
>A01_639932
AAAGGGGCTACTCCATGCAATGCAAGTAAA[G/T]GCAATCACGCTTCTATTATTTAGTATCATT
>A01_640965
ATCACTGCAGACAAGAGGAAGGAGCAGATC[G/A]GAACGCAACAAAACAAAAAATACAATTCTT
>A01_641240
TCATCTGCTCTACAGCTCTATAAGTGGAAT[C/T]GCAAGTTTTGCAATATGCAACATTTAATAT
>A01_641422
GAAATCAGAATAACCTACAAAAGAAAGAAA[A/C]ATTATATTTTGTTGTTTATTTTTATGTTTG
>A01_641552
TACAGTTCTACTAGAGGCCCGATCGAAAAA[A/G]GAAGAAGAAGATAGGCATGTTAATTTTATC
>A01_641883
CATGTGGTCGAGAGAACAAAGAGTAACACG[A/G]AAGGGAATCTTTTTTCCTGTAAAGTGTATT
>A01_641915
AGGGAATCTTTTTTCCTGTAAAGTGTATTT[T/G]TCAATAATATTGATCACGTTATTGTATCTC
>A01_642707
CTGCAATCAAAATCGCGCCTTGCGCGACCC[A/G]AGTTTCTACAACTCAATGGAGCTTTGTTCT
>A01_642831
TCTCAGTTCCAGCTAAAGCCCTCGACTTTC[T/G]CCAAACCCAGACTCCGAATCCACGCCTCCC
>A01_643301
GAAGAACGGGCACTCGAGGCTTTGGTTTTT[A/G]GGGCAGTATGTGATTGAGCTTGCGGTTACT
>A01_643341
GTGATTGAGCTTGCGGTTACTGAGTTTTTC[C/T]TGCAGAGGTATCCGAGGGAGCCTCCGGGGC
>A01_643816
TGCCAAGAGCTTTTAGCTGATTTGACTATT[C/T]ATCTCTTATGATAAGTTCAATATATCTGTT
>A01_644613
AAGTCATGCAGGCCTTAGGTTACCCTTTAC[C/A]GATGAACGATAGAATCCAAGAGATAACCGA
>A01_645341
ATCTCCATATCTAGTATATGGTGGTGGAGA[C/T]ACTTAAAACATTTGATTTCACTATTTACGT
>A01_645721
TATTAAACCCTAAACGGTCACACATCAGTT[G/T]TCCACCGTTGGATGAAGACTCCATCGGCAC
>A01_648011
CTATTCAAAGAACCTTTTGTTGCCGCTTCA[T/G]CATTGGCATCAAGGTTGGTGTTCGAGCTCA
>A01_648442
AACATTACCAGCTTGGTTAGGGAGAGATCT[T/C]CAGTTCTTATGACCATACTTTCTGAATGAA
>A01_648483
GACCATACTTTCTGAATGAAAGAGATGAGT[A/T]TCAGGTCTTCGTCGTAGCTCCATGGTCCTC
>A01_648554
GGTTTTGTCACAACATGGCGCTCTTCCTTT[T/G]CCCATTTTCTCTACTCTCTCTCACACACAC
>A01_648590
TTTCTCTACTCTCTCTCACACACACTTTTG[T/A]GTTTCCTTTTACCAAATCAAGTTGGTCCTA
>A01_648802
ATACACTTACCATTTGTATCTCAAAATAAA[A/T]AGTAATTATGTTATAAAAATTTTTCACACA
>A01_648918
CTAAAACATCTTAAAATGCCTATGATGATA[T/C]AATTGTGATTATATCGTTCTATAAAAAGAA
>A01_649338
AATTCACTTTCAATTGATTATATTTAAAGT[G/A]TATAATTGTTTGCTTTATATATTAACTGTA
>A01_649387
ATATTAACTGTAGTATTTTATGACAAGTAA[A/G]TATATTCAATTCGATTTTTGTAGGTGCATA
>A01_649516
ATTTGGAACTACTTTATATAAAGACAACTA[C/G]TTTATGCATGATTTTTGTTTAACCATTCAA
>A01_649674
ACATTTTTAGAAACATACCGATATCAGTCA[T/A]CAATATACCAAGACTTGACTGAAAGATTGG
>A01_649709
ATACCAAGACTTGACTGAAAGATTGGAGAA[T/G]GGATGTTACAAAGGTAGAAATCTTATCCTG
>A01_650183
TAAAATCCAATTTATACCGATTTATATGAT[T/C]CAAATTGCTTTAAACTGTTCTAAATCAGTT
>A01_650336
TTTTGTATATCTAATTTTGATAATTTCATC[T/A]CAATAATTTTATAATTAAACTTAAAAACTA
>A01_650589
GATTTTTTATTTAATTATATTATCATAATA[T/C]GATTTATAAGAAATTAATTAACAAAAATTC
>A01_650696
TCATATTATGACAAATTATCATGTTAATTT[G/T]TTATTTCTAAAAATGTTTATATTACCAAAA
>A01_650772
ATAAAATGTAAATCAATATCAAATATAAAA[A/G]ACTTACAAAATAAAAATTATTTAGAATCTA
>A01_650860
ACGATGATTCTTTGTTAGCATAAAGATCGA[T/C]TTCATCTTCTTGAGAGTCTTGATGGAGTCA
>A01_651332
AACAATTATTAATATTCATCACCAAATTTG[G/T]TCCAAACATTTTGAATTAAGTCATGTTTTA
>A01_651461
CTCTCCGTTTCCACCTGTGAAGTTCTAGTG[T/C]TGTCTCCTTCTTCAAATTCAGATATATCGA
>A01_651564
GTAGGATGATACATGCTCTCATAATCTTTC[T/C]TATCTTTTCCTTATCCAAAGTTTTTACCGG
>A01_653401
AGTCCTAGCAATAGAAACGAGATAGCTAAC[G/T]ATGGGAAGAAACAAAGACATAACCTCATAA
>A01_656419
TTCCCGTTTTACCCCGGGCATCGGAGGCGG[G/A]CGCGCTCGTAGCTAATGGAGACGGCGGCGG
>A01_656463
AATGGAGACGGCGGCGGCATCGGAGCGAGT[C/G]GAATTGGCGAAGCACTGCAGCTCGCGGAAC
>A01_656580
CGATATATGGTTGGTGTTCGCTGATCTTCA[A/G]TTCAATTCAATTCAGATCGGTATCAATTTT
>A01_657120
TGGGTGAGAAATCAATGGATGCATCCAAGC[T/A]ATCTGGTGGTGCCTCCGAGTTACGTAATGG
>A01_657174
GTAATGGATTAGCGTATAAGGAAAAAGAGA[G/A]TGTAAAGTCTGGTAGCCAAATCAATGGTAA
>A01_658018
ACTAAGGTATTATTCGTTTATTTGACAAGA[G/C]TTTTTACCACAGTGGGTTAAGTTCACAGAT
>A01_658120
AGGTGAGGCTTGGAAGCGGAGAGGACAGGC[G/T]CGTGCTGCTCTTGGGGAATTTGCTGAGGTT
>A01_658206
TGTTTTTATTCAGAGCTAAAAGCATAGACA[T/G]TAAATGTATTTGATGGGCCTATATTCGCGC
>A01_658367
ATTTTATGGGTAAAAAATCAGATACGTTTC[C/T]TGTACACACTCTTAAGCTACTCTTTGGTGA
>A01_658987
AGTATTTTGTTAATTGCTTATTCTTTCTTT[C/G]TTTTTTCAATCTGGGTTTTCATGCATATGA
>A01_660840
AGAGTGGAGGAATTCAAACAAAGGCACGGC[A/G]AAAAATGGGAAGAAAAACCGTAGGAGAGAG
>A01_661005
CCGCTCTATCTTGTCTTGGCAAGACGTTTA[T/C]TCGTCTGCTGTCAGATGGAGACAAATTTCA
>A01_662360
TGCTAATATGGAGTTCACTGAGAGTATCCC[T/C]AAAGGGTTACAGATCGATTGGGAAGCTATA
>A01_662447
TGGTTCGGTTAAGTCTTGGTTATACCCGTC[T/C]TTGAAAATCAACACCTCGTGGAAAGATCAC
>A01_662665
AAATCTTCGGGTTTATGATATGTTTGTGTC[G/T]TAGAAAACAAACAAACAAAATTGATAGGTG
>A01_662715
ATTGATAGGTGTTTTTTCTTTATTTTACAT[A/C]ACTCATATAACTTTATTTTACAGTTTGAAT
>A01_662863
TACTAGTCTAAAATAATGGCATTCACCATT[A/C]ATACCGTGATTAGTATGAAGCTTGTTTATT
>A01_663013
TTTGTTTAAGATTTGAGTCAAAACCTGTAA[G/T]AAAGTCAACGGACGAGCCATTCGGTTTGGG
>A01_663159
TATCAATCTTAATGCTTCTGTTTCATAAAA[A/T]TACATGTTTTAGAAAAACAAAACTATTCCA
>A01_663381
TAATATATTTTATTAATATGTGTGAGAAAA[T/C]TAAAAATATGTATTTTTTGAAATAAATAGA
>A01_663504
TCTTCGTAGACAGTTGATTCGGTTTCCATT[G/A]CTGTATGCATATTTATTTCCAATCTATCGA
>A01_663545
ATTTATTTCCAATCTATCGATTACTCAATG[C/A]TCATGGGATGAGGATTTAAGGAAAATAAGT
>A01_663988
TGATAATATTTCCACACTTGTCATGAAAAT[T/C]AGACACTTAATTTTTTTTTTTGATAAAAAA
>A01_664156
ATAGGTCTACACTCAACGGCTACATCTGTC[G/T]GTGATATTTTTCTGATCAACGGTCCGAATC
>A01_664290
TTACTTTTACATCCTTCACTCATTTATTTT[T/C]TAAGTTCTTTTCTTCTTTTTTTTATTGAAA
>A01_664376
GTCCTCCTAACGGTTACATTGATCTGCATT[G/A]TCGTCGCCGGTGTCGGTGGCCAATCTCCGG
>A01_664742
CCGATGGAAGCTCCTGGTCCTAGCTCCGAC[G/A]CCGTGTCTCCTGGTCCGGCCACATCCGCCA
>A01_664911
TAATTATGTTGTATATTAATATGGAATTAT[G/T]ATTAATGCAGAGTGGAGCCGAGAGCACAAG
>A01_664943
TTAATGCAGAGTGGAGCCGAGAGCACAAGT[G/A]TATTGCGGAATTTAGCAGCGGTGGGAGCGG
>A01_665108
TCGCGTTTGAGTGATGAGTATTATTTAATT[G/A]ATTATTACAGTTTGTTTTCTTTATTTTCAT
>A01_665310
TTCAACGTATATGAACAATAAGCAAATCAG[C/T]GTAACTGTTTTTAGATGTTTATATTGCTGA
>A01_665340
CGTAACTGTTTTTAGATGTTTATATTGCTG[A/C]GTGCATTAACTAATTTACTGATACCACATG
>A01_665898
TTGAATAATGAAATACTAGGGTAAGACCCA[G/C]GAATGAACATTATATATCAAATATTTTTAT
>A01_666163
TGATATTAATATATTCATAAATATATGTAT[A/C]CATTAATTTTAATATTTACATAAATATATG
>A01_666228
TATTAATCTTAATATTTATTAAATGAGATC[T/G]TCTTGTATCTTGTCATAATAAAAATTTTAA
>A01_666366
ATATAACATATATGGAAAATCTAAATTTTT[T/A]TATGGTTAATGTTATTGTTTAATATATTTT
>A01_666625
ATGGATACCTCAAATGTTGTAAATACTTTT[A/C]TTTTTGTATACAAGAGATATTCATAGAGAA
>A01_666721
TAAAAGCTTAAAAAGTATTTAAAGACGTTA[C/T]AAAAGACTGTCCACACAAATAAAAACGTTA
>A01_666836
CATGGGAAAAAGTTTAGTAGAATATGAACA[A/C]AAGCTTAATCTTTCAGATTAAGTAAAGTGT
>A01_666903
AATTCTTGTAATTAATTAATACAAACTAGA[T/C]AAATAATTTTGTTAGTGAGCTTAAATCAAA
>A01_667154
GACTATCTTCTAGACGATATGGGAGGTTCA[C/A]TGGGCTTTCTCGGAAAAGGTTTTGTGTTTC
>A01_667275
TATTAGAAAGAAAAATAAGTTTTTCGGTAT[T/G]TTTTGGCATATAGGGGTACCACCGACGCAG
>A01_667754
AAGCTAAAGACGAGGAAGAGAAGAAGAAAG[G/T]GTTCACAGAGTTCATTGCAAAGAAAGTGAA
>A01_667795
TTCATTGCAAAGAAAGTGAAGCCAAGTAAA[C/G]TCGATGACGTCACTATGATCACCGGAATAG
>A01_667974
CTCTGCTAAACTCTCAAGAAGAATGTATTT[A/G]AAATAATGCTTTTAACTTAAACATTCTTTA
>A01_668007
ATAATGCTTTTAACTTAAACATTCTTTATT[T/C]TCCTATTTTAACTTTCTAAGTTAGAAGCAA
>A01_668190
TTTTATTGAAACTTCCCAAACCATTTTAGG[T/A]TCTTTTTCTTGATCCAGCAGAGCCTCATGA
>A01_671130
CAAATCCAAAAAGAAGTAGTCGATTTGGTA[T/C]GAATGAGCATAGTAGCTCAATGTATGTCAC
>A01_672369
ACAGATGGGGGCAGCGAAAAGTCGAACGAT[A/C]TCTCTCCCACTCTCTCACTCTCTTGGATCA
>A01_672411
CTCTCACTCTCTTGGATCATCAAAGTTGCA[G/C]AAGAAGAAGGGATCATCAAATTCGTTGCGG
>A01_672529
TAAATGGTTGTGTTGTGGTAGGAGGTGATC[A/T]TCATCATGTGTTAGAAACGGCAGTGTGGTG
>A01_672608
AGTTCCGGCTGGTGTAGACCCTCGTTGTGT[A/C]CGTGCGTGTATAGAATCTGCCTTGGAGAAG
>A01_672725
CTCTAGTGACCTCTTGCAAAACATCTCTTC[T/C]TCTGGAATCATTCTTACTCACGCCCCCTTC
>A01_672778
CCCCCTTCGGTACGCTAAAATCAAACCAAT[C/T]CTCGATTTGTTTTGTTTTGTCTAATTAATT
>A01_673383
GAAAGTGAAGAACATATTCGCAAGGTAAGC[A/G]CAGCTTGTGATCATTATTATACATTTTAAC
>A01_673437
TTTTAACAACTCTCTGTATCACTAAAATTT[A/G]ATCCCCATTTTGGTTTGTTTTCAAGCTGGT
>A01_673766
GGTTTGTTTTTCTTTTTTCTTTTTAATTAA[C/T]ACATGACAAGATTTTCGGTTAGTTAAGTTT
>A01_673811
TCGGTTAGTTAAGTTTTATAGTTTGACATA[T/G]CAGTATATTAGGTGTTTGTTTTATAATTTA
>A01_674127
TTTTTAGTATGCATCCACTCAAATATTAAT[C/T]CATTAACAAGATGGAATTTTAGTTGGACTA
>A01_674175
TTTAGTTGGACTAAAATTGTATTAAAATTA[T/G]AATATCAATTTCATAATATATTCTCTATTC
>A01_674251
AATATATATTACAATACTCTAAATATAATA[A/T]TAAATCAAACCGGATTACATATTGGGTCAT
>A01_675233
ATGATTAATGGAGTTCTTAAAGATGGAGTT[T/C]TTATCGTAATTTAAGAACCGATTCTTAACT
>A01_675492
GAAAATGCCTTTGTTGTTGTTAAGTTTTCC[T/A]TGGGAAAAGTTTTAGTAGAATCTGAAAAAG
>A01_675538
TAGAATCTGAAAAAGCTTAATCTTTCAGAT[T/C]AAGTAAAGTGTTATAATAATTCTTGTAATT
>A01_675854
GAGGTTCAATGGGCTTTCTCGGAAAAGGTT[G/A]TGTGTTTCTTTAACCTAACAATCAACGATT
>A01_675967
TAGAAATAAAAGTGTTTTCGGTATGTTTTG[G/T]TGTATGGGGGTACCACCGACGCAGATGATG
>A01_676172
ATATATGATCAACAACATAACTATATGTTT[G/T]ATGTGTAGCAACTCCAACTCGGCATTACCA
>A01_676217
CAACTCGGCATTACCAAGGCCGACACTTTG[T/A]TTTCCCGACCCCTGACAAAATAAATGCAAG
>A01_676279
AGACCTTTTTAATTCTCCAAGTAAAAATAT[C/T]ATAACTATTTTCTCTAACACAGTGATAATT
>A01_676370
AGCAAAAGACAAAGAAGAGAAGAAGAAAGT[A/G]TTCACAGAGTTCATTGCAAAGAAAGTGAAG
>A01_676532
CATCAAACTTATACCTGATGTTATATTCGT[C/T]CTTACGGTCACCATTTTGGCCATTGTCTCT
>A01_677095
CCAAGATCAGACTTGTTTTATTGAAGTTTC[T/C]CAAAGCATTTTAGGATCTTCTTCTTGATCC
>A01_677146
TTCTTGATCCAGAAGAGCCTGACCTTCTTT[T/C]CCCTCGCTTTCTCTTCTTGTTGGGACGCTT
>A01_677201
ACGCTTGGTAACATTTGACTTTGGCTTCTC[T/C]TTTGAAACTCTACGTCTCTTTGTCTTAGTC
>A01_677657
TTCCACCTTTACTGCTTCAATCTTCAAAAG[T/C]ATCTGTTCCAAGAACGCATCACCTTCCCCA
>A01_677712
TCCCCAAACTCAAGAAGCAATGTCTCCTCA[C/A]AGAAAACTGCCTCTTCCTCCTTAGAGTTCT
>A01_677771
CTTATTCTTTTTATCACTGAGAGCAACATC[G/T]CCAAAAGATCTTCGGTTTTCTGTAATTAAA
>A01_677838
GTATTAAAGTAGTAATAATTAATGGTAGAT[A/T]AACAATGAACACGACCACGAGAAGATACCG
>A01_677880
CGACCACGAGAAGATACCGTGATAAGAGAA[T/G]AGATTATGGTTTAACACATAGGAAGAAACA
>A01_678303
CAAAGGATCAGTACACATGATGGAGTCAGC[T/C]TCTTGATCATTACAAGCTGTTTCCTCAATC
>A01_678657
GATTCAAAACAACAGATTCTAAGGGGGAAA[T/A]TTACCAATCAGCGGCGGATCGAAACGGAGA
>A01_678993
TTCCTACACATTTTTTTTAGATATTAGACG[A/T]AAAACCTATAGTTGTACATATTTTGGAACC
>A01_679246
AGCAGTATAATATATCTAAACATTAACATT[G/A]TCGATGACATATATTTTTCTTTTTATTCAA
>A01_680311
TATTTGTATATATGCTTTAATTTTTTCATG[C/T]AAGTAACAACTAACAAGGAAGCAGTGTTTT
>A01_681370
TTTTACTTTTTTCTCTTTTTCATCAGATTT[G/A]ATATATGTTGCGTTTTATATAAGAACAATT
>A01_681444
ATAGTTAAATATCAATGATAAATGATGAAA[G/A]TCTGTTGACAAGTGGATGAACCACTTTTTC
>A01_681548
ACATTATTTTCAGTATGTGATAGATCTTTT[A/T]AAAAAATCTATTTTATTCTAAGTTTCAAGA
>A01_681620
AAATTTTGAAAAGAAATTAAAAATTTTAAT[C/A]CTATTTTTAGGTTTAATATCAAATTTAGTT
>A01_681711
CTTTTTTCAATTAAAATTAAGATTTTTTTT[A/T]AAATTTTAATCTATAATTTAGTTAATTTCA
>A01_681825
TTTTGATTTTTTTTTTTTGAAATTTATTAA[A/G]ATTCTTGATTAGAGTGAATACAGTTGGGTA
>A01_681876
CAGTTGGGTATGAGCATGGTTTTGAAATTT[G/T]GTGTATTTAAAAAGAATAAAATAATTATTC
>A01_681921
AATAAAATAATTATTCTTTATATTAAATTG[A/G]TATTTAAAAAGTTCGGATATTTAAAAAATT
>A01_681965
CGGATATTTAAAAAATTCATAAAAGTTAAT[T/C]TGGATATTTATATGGAATCTTCTTGCTTAT
>A01_682004
TATATGGAATCTTCTTGCTTATATCATAAG[C/T]TACTTGTTTAGTATATAATATATGTTATAA
>A01_682116
TGATTTTAATATATCCACAATTACCATATA[T/C]AATTTAATTTTACAACAGTACAATGATAAA
>A01_682750
AAAAAAGCTTATGAACTCTTTGTTCTCTGT[A/G]ATGTTCAAATGGTTCTCATTTTCTTCTCAC
>A01_682807
TCACCTTCTGGTAAACTTTTCCTGTTTGAT[A/C]CGAAAACAAGGTATTGTTTCCTTGTCAAAA
>A01_682906
ATTTACTATTTCATCAAAAGTGGGTTTTTG[T/A]TATCAAATCATCGGTATTCTTTTAATTTTT
>A01_683029
TATGTGGATGTGCCTATACGTCCAAGGTAA[T/A]TTTGTTGTGTTAATGCATGAAGGAACTTAC
>A01_683456
ATACTTCACTTATATTGTAGTATTTTATGA[C/T]AAGTAAGTATGTTTAATTCTATTTTAATAG
>A01_683840
TCTATTTTATTTTCAAAATTAAGGTACTTT[C/T]TAAAACATCCAAATCAATGGGGAACAAGAG
>A01_683911
GTATCAAGAGAAAATACTCGAGGAGACGTT[G/A]GATAAAGTTCGATCTCGGAAGGTAAATTGA
>A01_683971
ATTATAATACAAAAATGGGTCTTAAACTTA[C/A]GTTTTAGTAACATCCTTAAGCAAAAAAAAA
>A01_684026
AAAAAAAGGTTTTGGAATTGTGTTTTTTTT[T/A]AATGTGAATACACCATCTATATCTTGACAG
>A01_684330
TATTATTGAAAATATCATTTTAGTATAATT[A/C]AAATGCGTCTTTTATGCAGATTTCCTAATT
>A01_684617
CCCAGCACTCTCCGACATATCAATCTCTTC[A/G]CCTTTCACACTCTCCCACTCAAAGCATTGA
>A01_685524
AAGGAATGTAATCTAAATAGTATTATTTGC[C/A]AATTTATGATACTTTTTTCAAATTTATGAT
>A01_685818
CCACAAATTAGATTAATTATCTTTGAACTT[G/A]ATAATGTTTTTAATTAAATCGAAATTTGAA
>A01_685946
TGAGAGCAAGTGGTTGACCATAGTGTTACC[G/A]TCTTTGTCTCTCCGACACTCATCGAGCAAA
>A01_686144
CTTGAAAAGCTCCGCTTCTTCCTTGTTGTA[T/C]ACGTCATCTCCGTAATACGTCTTCCCCGTA
>A01_686675
CGGTGGACCAGGAGGGAGGTTAAAACGCTC[A/C]GTTTTGGAGAAGAGGAACTTATAAGCCAAG
>A01_686805
TTTTTGTGTGTTTCTCTATTTGTGGTGGAT[T/C]ATAGCTTTGGTTTGTTTGGTTTATATAGAG
>A01_687809
TGTTGTGCGAATTTCAGTCGGCAACATGGA[T/C]ATTAATTTACGATTGTTTTATTCACTGAAC
>A01_687855
TTTTATTCACTGAACCTGTTTTTTTTATAT[G/T]TCCAGATGATCCACTAAACCATTTTAAACT
>A01_688103
GAGTCATAAGTCAGCGCATCAGACGAGGGA[A/G]TTTACGAATATTGTATCAAAAATTGATATT
>A01_688194
GCTGCGAGGTTGTTAATAATGCTAAACAAA[G/A]TACGATTTTGATTTTATCAAATCGGAAGTC
>A01_688355
TAGTTTATATACAAATACAAATTTCAAAAG[C/T]TCGGGGAAACAAAAATATATACAACTCATA
>A01_688540
ATTCGTATTTGATTCCACATCCTTCAGTGG[G/A]TATCCGAAGCATTTGGTGTTATTCTTTTCA
>A01_688709
GTTATAACATCAACCATTTCTTGGTTATCC[T/A]TTTCAACCTTGAATCGTGTGACTTCAACTA
>A01_688862
CTTTAAGCCATGACTTCAAGGAACCTTTGT[G/A]CCCATCCTTGATGGTGATGTTACAAAGACG
>A01_688909
ATGTTACAAAGACGCGACTGATAATAATAT[T/A]ACAACATAGTTTCATCATTTTGTGCAAACA
>A01_689358
TATAGCCCAAGCGTTAACAATCACTATCGT[C/G]TCACGCGGTATGTCGTAACCACCGATCTTC
>A01_689778
TTTTCAGAAAAAAATTATAATTATAATTGA[G/A]AATTTTGCTTTCATCATCACTAAATAGAGA
>A01_690630
GGTGGTCCCGGTGGGAGATTAAAACGGTGC[A/G]TTTCGGAGTAGATGAATTTGTAAGCCACGA
>A01_692311
AGCCCGCATATACGTCACCGGTAGTGGTAC[G/A]AATCCCTAATGAGCTAAACGCATCAAAGAA
>A01_692412
ATTGAAAAGTGAAATATACAAGTTACCCCT[T/C]TAAAACCACACAAACATTATCTTTACTTGT
>A01_693523
CAAAATCAAGTTAGATAATGAATCTAATTG[C/T]TGATTTATTTCTATGACTTTTTGGTTAGTA
>A01_693675
TGAAGTAGTTCAGCTTCAGAATTTCTAAAC[T/C]CAAAGTTTCAGTTCTGTTTTTTTTTTTTTA
>A01_693724
TTTTTTTTTTTAAATAAACAAAAAATTGTC[A/G]CCAAACAACTATTCTATTAATACAATTAAC
>A01_693958
ATTTGAAACTCTAGTCCAATCCACAACATA[G/A]GCCGAAACACGCCGTTTAAACTTAGCCTTA
>A01_694342
CCAAACCGGAGAGAATAGAAACTCATCGAC[A/G]TCGACATACATCATCCAAGTGCACGAATCG
>A01_694396
CGAATCGTTACCGTAAACCGCCGCGTGGGA[G/A]AACCCAGCCTCCTGCGTCTTGGGCCATATC
>A01_694436
TCCTGCGTCTTGGGCCATATCCATAACACT[T/C]TCATCACGTCGTATCTTTCGCTCTTCAACC
>A01_694537
ATATATAATGAACCTTTGTATTCCTATCGT[T/C]GCATGATACATCACCCACTCTCTCAGATAC
>A01_706487
AACCAGACAGAATAATACTCTAGCTCTTGT[A/G]CCGAGTGTATTGCATTTCCCAACGGAATTT
>A01_708852
AATTTATTTTCTATAAATAAGTATGTATTC[C/T]TATAGAGAATGAAAATCGGGTTTTTAAAGC
>A01_712799
TTTAAATGTATTATATACTTTGAACTTACT[T/G]TTGGTAGTTTATATTAATCATACATATTAT
>A01_713040
ATCTTCATCAATCTTAGCCACATCTTCCTC[A/C]TTAATAATCCCAAGTCCTAGGTGGAAACAA
>A01_713256
CCACCTCCGCTTACTCAAGCCACCGCTCCA[C/T]CGCGTTTTCTATTCCATCTCTCAATCTCTA
>A01_713562
GTTTCTGTCTATACGCCAGGACGAGGTCCG[T/G]CGGCTTATAGTTCGTCTCTCACGGAACTCT
>A01_713831
ACCTAAATATTTTACATTTGAAAATGTTAA[T/A]TTTTTAATGTTTTAGTTTTTTTTCCTACTG
>A01_714160
TGCGGGAAATGCGGCTGACTATGTACCTAT[C/A]CTGCGTTGGGTCACGGGTTTCGAGAAACGG
>A01_715044
CTAAAGCTAGACCTCTGGTAGCCATGTGTA[C/G]AGCACGTACGACCTTGGTTGGTAAAATCCT
>A01_717086
CTTTTCTCGACTCAGAGACTTAATGCGTTT[T/C]TATATATCCGTAAGGACGAGATCCAACGCC
>A01_717277
CAGATAATCAAAAAAGTGTGTCAACCATTT[A/T]AATAGTATAAATATTTTTAATAAACTTAAA
>A01_717536
ATATATATAATCCCACCACCCTTTATACTA[T/C]TATTATATTAGATAGTGATCCGTGCTTTGC
>A01_717711
AACCAGAAAACAAATTAAAAGCCTTTTAGG[C/T]TCAAAATACATGTTTTAAACATGTTTACAT
>A01_717871
ATGAAGTTTGACTCTTATTAGAAAAAAATC[G/A]AAAGTATTTGGTGAAAGATTGGTAAGTGTG
>A01_718716
AGAAAACGATGAAGCTAAGTTCGTGAGGCA[A/G]CTTGTGTCCGAGGTGGTGACCAGCGCCGGT
>A01_719372
GCATAGAGATCCAATGTTATGGGAAGATCC[G/A]GAGCTATTCAAGCCGGAGAGATTTGAAAAA
>A01_720083
AAAGCCCGTGTAATTCCCGGAAAACTTCTT[C/G]TTGTGAATTAGAGTTCTCAAATGTTTCTAT
>A01_720495
GAGTTTACACAAAAAAAAAAAAACTTTGTC[G/A]ACTTGCTAAGCTAAAACAGGCTTAGATAAT
>A01_720742
ATTTCATATTTTGTTGGTGAAAGACTTGCA[C/T]CTCTTAAATATGTTAAAGTCTGATATAGAA
>A01_720787
AAAGTCTGATATAGAATTCCTTCCCTCATA[A/G]TGATGGGTTGTTTCACTTCCATAAAAACAA
>A01_722357
TCTATACTATATAAAGATTTATTATTAGTG[C/G]TGTATGCTTTCAAAACTAATAATATTTCTT
>A01_722428
ATTTTTACATACTTGTAAGATCATTTATAA[A/G]AATATACATTTATAAACGCTCGTTTGATCA
>A01_722492
AATAGAGAATGTTTATAAGGACTTTTTAAG[A/G]AAATTATAGAATTGTTTATTTTTGTTTATA
>A01_722627
AACTAATTATATAAATTATATTTAAAACAT[T/A]TTTTCTTATTAATATTTTGAGAAATGGTAT
>A01_722885
GTGCAGATAAACGGTAATTAATTAACAACT[T/A]GGAGTATTACTTTTGTTACTTTACTTGCAA
>A01_723386
GGCTCCTTACGGGGACCACTGGCGAAACCT[C/T]CGCCGTATCACCGCCTTGGAAGTCTTTTCA
>A01_723448
CGCATCGACTCAACGGCTCAGCAGAAATCC[T/G]ACAAGACGAAGTCAAGAGGCTTCTACAAAA
>A01_725277
GTTAATTTGTGGGCAATACACAGAGATCCA[A/C]GTGTGTGGGATGATCCGACCTCGTTTAAGC
>A01_726816
TTGGTTTACAACTGGAAAAGAGATAGAGAT[G/A]ATAGATTTTACTCACTGGTTTGGTTGTGTT
>A01_730534
CGTTTTTAGCATTAAAAATATTTATTCATC[A/G]TAATAATATTTCATTTTTAGATATTTATGT
>A01_730814
ACTAATAACTACGGTCGTAATTCAACAACA[A/T]ATAGCAGCATGAGTTGACTTTTCATAGAAA
>A01_732308
ATTACAACATACACCCCTAGTCTCGTGGAA[C/T]CAGCGGGGGCAGTTTCAGGGACGTAGATAA
>A01_732392
CGGCCCCCACTGTGATGTGAGTGAGATCTG[G/T]TGCCTCTCTCGCTCTCGGTGGCAATGGGAA
>A01_732585
AGGCAATTCAAACTCTCTCTCTCTCTAACT[C/A]TCGCTAGCCTTTAGATTTGGATGATTCAAT
>A01_732753
CTTTGCGTATTGGATTCATGGAGCTTCTGC[G/A]AATCGAGATTGAAATGCCCAGTCTATATAG
>A01_733005
TTCATTATCTCGTGAGACTTTCTTTCCTCT[G/A]AGCTATTATAGTTGCATCCCCATCTTTGTT
>A01_733056
CATCTTTGTTTTACTGAGTGATACAGCGAT[A/C]TGTGTCTGCAGGGTTGGAACAAAAAGTGAG
>A01_733754
ATGAGGTTAGGCTTGTGAAAAAACTCAAGA[G/A]ATTTACTTGCTTTAGCTCTACATCGATTAA
>A01_733921
GAAGGATAACGTATCAGCAGATAAGCTACT[C/G]AAGATCCAAATGCCTGCAACACTAAAAAAA
>A01_734053
ATCTACTCTGTCTTCTAATCTTTGAATGAT[T/C]ATGTAACTCTAGGTTGTGAAACTTCCGCGT
>A01_734375
TGATATTTCACCTTCAACTGTTTATGGCGC[C/T]GAGCATTTACTTCGTCTATTTGGTAAAGAT
>A01_734875
ACATTTTTCACAACGATCAAAATAACTTCC[G/A]TTTGAACGCGTAAAAGGTTAATACTCAAAG
>A01_734908
TGAACGCGTAAAAGGTTAATACTCAAAGCC[T/G]TGGTTTGAAACAGAAGGTAACAAAAAAATA
>A01_735478
TTTCCTCAGGGAGCATCTTCATCTCTGCTG[T/C]TCCTCCGCCGCGCTCTTCGTCGCCGCCGCC
>A01_735646
ATTAGTTATTGAATCTCAGCCACACGATTT[A/G]AGGAATTGGTTTTAATGTGTTAGGTGTCAG
>A01_735705
AGCATCTCTCGACGCGCTTATGGATATAGC[T/G]GGAGGGAAAGTGAACATCCATGTGTTGATG
>A01_735768
ACTTGCTGCTTTTGCTTCCGTGTTTATGGG[A/C]AACGCTCTTGAAGGAGGATTGCTTCTTGCC
>A01_735961
TAAGGAGTTGAAGGAGAGTAATCCGGATTC[T/C]GCACTGTTGATCGAAGTGAAAAATGGAAAC
>A01_736054
CGTTCCTGTGCACAGTGTAGAAGTTGGGTC[C/A]TATATCTTGGTTGGAACTGGTGAGGTCTGT
>A01_736274
ATTGGAGGCGAAAGCTGGAGATAGAGTGCC[T/A]GGTGGTGCAAGAAATTTGGATGGCAGAATG
>A01_736348
TTTAAACATAATGTATATTGCTTTGGCTTG[A/C]CTTTGTTTGAAGTTCTCAAGCTTATCTTTA
>A01_736393
CTCAAGCTTATCTTTATTTAATTTTTTAAT[C/T]AGGCCACGAAGGCATGGAATGAGTCGACTC
>A01_736494
TAAACCCAAACTTCAGAGATGGCTGGATGA[G/A]TTTGGGGAGAATTACAGCAAGGTGGTGGTT
>A01_736601
GGCCTTTTCTCAGCACCACAGGTAGATGTC[G/A]GAAACAAGTTCTCCGTTTTCAACATACATA
>A01_736770
TTTGCTGGTTAATGATACAGCATGCAGAGG[A/T]TCGGTCTACAGAGCATTGGGACTTATGGTG
>A01_738240
GTGTCTCAGGAGTTATAGCAGAACTTAAAA[A/G]CTGGGCCCAACTTCGAGTAATGATGTTAAC
>A01_738459
AGACAACTCAATAATTTTATTACTACATTT[C/T]GGTGAGTGTTTTAGGTGGAGGTTTAATTAT
>A01_738723
GCCTATTGCAGATTTAACAAGTGTTTTATC[C/A]TGTTGCAGGTCAAGCAAAATGTTGCTCTTG
>A01_738996
TGGTCGTGGAAACAAGACATAGCTCATCTA[G/A]TCAACAAGTTAAGCTCACGTGAATCCACCA
>A01_739590
ACCACCTCCTCCACTCCCTCCGATGGAACC[A/G]CCACCGCCCACGTTCCCTCTCTGTAAATCC
>A01_739849
CGGTTATTCCAAGGAAGAGACAAACTTAGA[C/T]AAGTCGGGGGATCTTCACCGGACGTTGACG
>A01_740543
GGGAGTTTTTTTTTTTTGTTGGGAGAAGAA[G/A]AGGTTTTAAGAGGATAAGAGCAAGAAGAGA
>A01_743778
TTAAAGGGTAAAATATCACTAATACCCTTA[A/G]TTTAAAATTAAATAAACAAACAAAAATAAA
>A01_745147
ACATATATTCACGTGTACAATACCTCGACA[G/A]TGAAGGATACAACAACACACACACACACTG
>A01_746464
ACATTTATTAATAATTAATGTTGTCTGACA[G/A]ATACTAATATATCTTCAATTTTTATATTGG
>A01_751515
TCAGATTGGGTTTTATAACCTTTCTTGGGG[A/T]ATTTCTAGTTTCATCTTTGTTTTATTTTAT
>A01_752227
TGTGGTTTATCTACTGAATTAGAGTATAAA[A/T]TTTTTTTAAATTAATTGATAAAAAATAGAA
>A01_753749
AAATCTGTGTATATAAAATATTTAGTTTTT[T/A]AAAAAATGGTAAATATACTGAAGCCTATAA
>A01_754502
ATCTTTAGTGTTTTTATAAATTTCTAACCA[C/T]ATTTTACATTTGTATTAATGTATTATAAAT
>A01_755599
GATTATTCCTAATTACTGATACACGTCCCC[C/T]ATTCGAGAGCTATTAATGCATTTGATACTA
>A01_757655
GTTTCAAAAGTTAATTTTAAACTCAGGCAA[T/G]TCCTTGCTTAAGAAAGCAAATTTAATATAT
>A01_759106
AAATCTCCGGCGAAATACCGCCGGAGATCG[G/C]TGCTAATTTCCCCATTAACGCCACCGTTGA
>A01_759233
TTTCTTTTCAGGAAACCCGGGTCTATGCGG[C/A]GACCCGTGTCCCATCTCGTCTTCACCGTCA
>A01_759521
TAACAACAACAACGACAAGCAACGAGAAGA[G/A]ACAACAGATACGATTACGTTATCACCATCT
>A01_759575
ACCATCTTCTTCTTCTTCTTCCTCACCAGA[C/T]GAGTCAAGAAGATTCACGAAATGGTCGTGT
>A01_760014
AGCCTCGTTAACCCCCGTTACCGTGAGTTT[T/C]ATAACGTTTCGTCGTTTGCTAAAATACGCT
>A01_760452
CCCGTTGTCGCCTTACTGCGCACCGGAGTC[T/G]TTCCGGAGCCTTAAACCGAGCCCAAAATGG
>A01_760572
TGAAGAGGTTGGGCTTGGAATCGGACTGAC[A/G]GTAGAGGATGGACACCATGCACTGAGGATG
>A01_760623
ACTGAGGATGGTCGACGTGACGATTCGCGG[T/C]GAGTTGCTTGGCAAAGAAGACTTTCTCCTC
>A01_762144
TTGCTCGGTGTTTAATCCGCCGTTTTTCAT[T/G]ATGAATTGAAAAGCATAATCCATTAGACCG
>A01_763055
GTTGTTCTCGTTGTGTAGATCGATGAATCT[G/T]AGGTTGTCTTTGAAAATATTGAATCTTTCA
>A01_765706
GCAGTGTACTAAGAAAAAATCTAATAGAGT[G/A]GGGGAAAAGTGGTTAAAGAAGACATGTGAT
>A01_765762
GTGATGTTCTGACAAAACCGCCCAATCCTC[A/C]ATTATTTCAGTTATGAATCTGTTTTCAGTC
>A01_765856
TTTGTATTTACTTTCTTCACAATTCTTTTT[C/A]ACGAAGGTATCTTTTCCAATGTCTTCATCT
>A01_766072
ACCCAAAGTTTTTGTTTCTAAGCCTTTTTT[T/C]GCAACTTCAAGAACAATGAAACAAACAATT
>A01_766127
ACAATTCTTTGTTACTAATACAGATAAGTT[T/C]TTATAAAGACCAAAAGAAAGATATATCGAA
>A01_766177
GATATATCGAAAATAAACGAATGATCATCA[T/A]TTCCCCTAAAAACCCGTATACCCTTTTGTT
>A01_766207
TTTCCCCTAAAAACCCGTATACCCTTTTGT[T/G]GTGGGAGCTCCATCATCATAAATCTAAGCC
>A01_766319
AGAATAAGATGATCTCTTGACATTTCTCTA[A/T]AAAACTTTGGCAAACAAATGAATGATAATA
>A01_766624
TGGAACATCTGGCCATGGCGTTCGTTTAGC[C/T]GCCACTGTGATCTCTAACGGAGGATCAATT
>A01_766707
AAAACAGAACCAAACATCACTAACTAACTC[A/C]TAGTTTGAACATTGAGCTAATTAGTTAACA
>A01_766757
ATTAGTTAACATCTTGAGAGCAAAAAAAGG[T/C]ATATACCCGGGAGGGAACTTGCTATCAGCG
>A01_767285
CTCGTCAAAGAACTCCATACTATGCATGTT[A/G]CTATCATCCGCAAACATCACAACCCCATCA
>A01_767747
CGTACTAAACTCTCTTAACCGAATATAAAT[A/G]TCTTAAAGTTCTAAAATTTCCAGGCCTAAA
>A01_767924
AACCTCAACTTTCCCACGATCCTCCCAAGT[G/A]TTAGGCATCCTCTGATCAAACCCCACGTGG
>A01_768693
TTCGGTTATCGCTTTCTTCTTGCTTGCTTG[C/G]TCTCTCCCACCATCTGATTATGCTTCGATG
>A01_768800
CAGGTGTCGGTTTTTTACTGGGTGGTTGTA[C/G]CTTTTATTACTCTCCCTAATTGAGTAAAAT
>A01_770222
AAAAATCAAGTTAGAGATGGTATTGAGTTT[C/T]ATATTCATAGAAATACAATGCAGGTGTATA
>A01_770331
AATAAGTCAAGTAGTGAAACGCCGAATAAC[G/C]AGATTTTGGACAATATAAATGTACTTTACC
>A01_770389
ACCTACGATCTTGACAAATGCAGCTACACC[A/T]CCCACAGCACCTCACGAGTCTTATTAATTT
>A01_770593
TAAAAATGCATACTAATTAACAATGATAAC[C/G]ATCATTGTAGAGACCCACTAGAAGCAGTGT
>A01_770629
TGTAGAGACCCACTAGAAGCAGTGTATGCA[C/A]TTGTAAGCATTTCACTTTTTCTACGCATTA
>A01_770747
TTTTGAAGCCACATAAATACATTTTGCCTT[G/C]GCTGAAATATTTGTGTATATACTATTTTTT
>A01_770840
CAATCATTATGTTCATCTAGATAACCGAGG[C/A]AAATTGCTTAAGCATACATGTGTATATACT
>A01_771495
TATGTTTTTTTTGTATTTGAGCTATTAATA[T/C]GTTTTGGTGTAATATTATATTTTTTTTTCA
>A01_771553
TCAGAAGTAGTCGGATATATAATATAGCTG[C/T]AAAAGATTCATGTAAGGTATAAAATATAGC
>A01_771596
TAAGGTATAAAATATAGCTATAATTCCGCA[G/C]TTATAATTAACAAAACGAATCAATACACAA
>A01_771677
GTATATGATATGATTGGTCCATAAAAATAG[G/A]AGAATTATAAATCAATAAAAACGTAAGAAA
>A01_771996
ACGGATCAATTTGTGTAAAACAAAAACTTA[A/C]GTTTGAAGCAGAATGAAGAATAAATCAGAA
>A01_772202
TTTTGTCTGTCATCAGATTGTAAAAGCCTA[T/A]AAGGTTATGTATATACATGAACTAATAGTT
>A01_772274
ATGTTTTGTTATAAAATGCTTTTGAACACT[G/A]TTGGTCACGGTTATGGAATAATACTAGCAC
>A01_772456
CGTCTTTTATTGGAAAAATCCCGCATGAAT[C/T]ACTTTCTTCTTATTGGATTTTCTGGACAAG
>A01_772545
CTTAAAAACGCTTTTGCTGCCTTATTGACT[T/A]AAGAATTACAATATATGCAGAGGCAAATTT
>A01_772703
CACAAACACACATGGTTCCAATAGAACAGC[A/C]GATCTACAACGCATTCAAGTTCTCAATAAT
>A01_772979
AAAATGAAGATATTTAGAAGGCCATTATAC[G/T]ATAATAAAGTATATCGCTCGCAATTGCGTG
>A01_773065
CATACAATGTCCACCGACCACCGACTAAAA[T/C]TTTTTTTTTTATTTCGATGTTTAAAATATT
>A01_773536
AAAAAATCTCGTGAAACAATTTTTTTCTTT[T/C]TAAAAAATAAAACTTAATGAAACGGAAGGA
>A01_773658
AATTTATAGTACTATATTTTTACATAAATA[T/C]TGAGATTAAAAATAGGAAAACAATTAATAG
>A01_773739
CAAAACACCTCAGAAATCCCACTAACTTGT[A/C]CCCAGAACAGAAGGAGACACGCGTGTCGTT
>A01_774004
TTCATGCAATCAATAATTTCCTCTGTTTAC[T/C]TGTATTTTTAGTTACTTTTATTGGTTAAGG
>A01_774166
TGAAAAGTTTTTTTTTTCTGAAAAAATGAA[A/C]AGTTGTTGACGAGAGAAGTTTAAAAACACT
>A01_774204
GACGAGAGAAGTTTAAAAACACTTTAACTG[T/C]AGCTGAGAAACTGAAAATATTCACACATGT
>A01_774456
GATAATACACCTTTTATACACCTATATTTA[G/A]TACACCTTTTAATAAAAGAGGTATGTTTAG
>A01_775122
TATTTTTGATAAGATTTAGTAATATTATAT[C/T]TAAAACAAATTTAAGTTCTATGCATATATA
>A01_775163
TTAAGTTCTATGCATATATATTAAATACAC[C/T]AAATAATATAATAAAATTAATGTAAATGTC
>A01_776898
TTTCTTTTGAATATAAAAAAAATTCTTCAA[C/A]TATACATACTTTTAAAAATTCTTCTCATGA
>A01_777316
TAATCTTTTGTTTTTGTGGGGTGAAGACAG[T/C]AAAAACTCATTTCAAAAACTTGATCCTTTC
>A01_778110
AATATAAGTTACATTTCTATATAGTTCTAA[A/T]ACGAGGTACAATGTTGAATACTTGGTTTCT
>A01_778540
TTTCCTCAACAACAACTGGAGCTGGGTGTC[A/C]TCAAATGTCCAACAAGCTTCCCATTGGTTT
>A01_779095
TAACCCCACTGGTTCTACCGATTCTTCTGG[T/C]TCTTCCAAAGCTATAGCGCCTAAATCGACA
>A01_780306
ATGCTCCCACAGTTCCAATCGATCCAATTC[T/C]TAAAGCTAATGCCAATGGTAAAGCCATAGC
>A01_780472
TACAACGTTGAAAACAAATCGCTTTGAGGC[A/G]TCTTCCTCTGGGCAACGTACGCCTCCTGTT
>A01_780891
TAGAGGGTTCAACTGTAAAATAAAACGACG[C/A]GGATTTCGGAAATGGCTTAAGTTACACAAG
>A01_781065
GGGAAAGATTTGGCTTGTCTGGCATCCGTC[C/T]ATCTCGGTCTCGGTTATTCACAAATCTCTT
>A01_782532
AGCATTCATCCCAGGTCGGCTAATGATTGA[A/G]AATGTGCTCATGGCCACTGAGCTGGTCAAT
>A01_782828
TGTCTCCTTATCTTTTTGTCCTCGCCATGG[A/G]GGTTCTGTCACAACTCCTGAATGCAAACTA
>A01_782889
TATGAATGGGCGCATCGGCTACCATCCAAA[C/G]GCTTCAAATCCTCTCATCTCTCACTTGGCG
>A01_783084
TCTTAATCCAGTCGAAGCAGATGACATTGC[T/A]GCTCTCGGCTTCTCCCTTGGATCATTACCT
>A01_783349
AAACTGATTGAATCACTTTGCTCTAGATTC[C/T]TTTGGAATGGAAACATCACCACAAGAGCTA
>A01_783712
GACTACTGGTCCCCGCTAGGACCTCTAATA[T/G]ATCATTTTGGACCATCTGGCCCAAGGCAAA
>A01_784003
AAAGAGTGGGCAGAAAAGGTCTGGTTCAAA[G/A]GACACATCCCTAGCCATGCTTTCATGATGT
>A01_784138
TGTGTCTGTAACAACTACCACGAGACGCGG[G/A]ATCACATCTTCCTGCGATGCGCATATGCTG
>A01_784244
TATTATTCCACACTTGGGAGGCTTTTCTCA[A/C]TTGGATTGGACTGAAGGTCTCTCACTGTCC
>A01_784325
CAGCTCAAGCGGTCATCTACAGGCTTTGGC[A/G]CGAGCGTAACAACCGTCTCCACAATGGAAT
>A01_786639
AATGGGACCGTTCTAACATTTGGGTGTGGT[A/T]TCGAAATAGTACTAAAAACAAGAGATAGAA
>A01_786997
TCCACTGTCTCCATCTTTTATTAACACATG[T/A]AGCATCATCATTCAAGTTCTCTGCATATGT
>A01_788596
ATGTTGTACATAGAGATGTATCACAGACAC[G/A]GACATATCACGTCTCTAACAAATCAAGCTT
>A01_790088
TTTTTGTGGAGGCTTCTCTACAAAAAGTCA[C/T]GAAGTAACTGATTTTCGTATATTAAGAATA
>A01_790307
AACACTCAACGAGCGGAGCAAGGAGTGATA[T/C]ATACGCGTACGAATATCGCGTGAGGTAAAA
>A01_790522
TTTATTTATTTATTTACCTTGATATCCTTG[T/A]ATGTCGTCATATTTTCAAATTAGCCTCAAG
>A01_790576
CCTCAAGATTTATCTGTGCCACTCGTTTTC[A/T]AAGTAATCGAATTTATATTTGTTCTGGACA
>A01_790669
ACTTAAAAACTGTGAAATTTATCCAAAAAT[T/C]ATATACTGTTATTTGAAAACTTCACAAAAG
>A01_791102
ACAAAATAACTATGTAACTGATCTTGGTTT[A/T]AGCGTTATTTTTGGTTGTAGGTGAAAATAA
>A01_792336
AAATCATAAAAGGTAACTTTGGTGGTGAAT[C/T]GTCAAAGTTATGAATTTGTTGTTTACTCAT
>A01_792396
TTGCATACGACGTGTTTAGTCAAAAGACTC[A/G]AACCCATTAAAACAAGCAAAATAAGAAAGT
>A01_792752
CGGATAGTTAGAGATCAACTGATTTATGGT[C/T]TCAGACATAGTTAAAGTTTGGGCAAAGTAT
>A01_792832
TTCACCAATCCAGCCTCGGTAAGTAAATAC[C/A]ACTAGAAATAAATTATTATCATTTCGAAAT
>A01_792917
AACTAGTAACTCCTAAAAACTACATGTGAA[C/G]TCTATATATTGCTTGTCTTCGAGAAATTAC
>A01_792973
ATTACTGTTTTTGGAACTTAACTTCAAACA[G/T]ACATAAACTTAAATCTCATCTACTTTAATT
>A01_793489
AGTGAAGAGAGAGAGGGAGAAAGGGCAATG[A/G]AAGTAAATACTATAAAGGAAAGGATAAAAA
>A01_793663
CTCTTATTTAGCTTACAACCTTGAGGAGAA[A/T]CAAACCAGAGAGAGGATTCAAGTTTGAAAC
>A01_794276
GATAATGAATGTAAGATATGTTTCTCTATA[A/T]TTCAGGGACTGTGGGAAGCAGGTTTACTTA
>A01_794326
AGGTTTACTTAGGTATATTAACTTTTTTTT[G/A]TTTTAGTTTTTTTTTTCATTTTTTTCTTGT
>A01_794380
TTCTTGTATTCTGCTGTTGAAAAATGTCAT[C/T]ATATAATTAAAAATATTTTTACCTTTTTTC
>A01_794671
ACTCCTAAAACAAAACAAATAAAATACTAA[A/T]CAATATGAATAGGTTATTATATTGATTAAA
>A01_794927
GATTTGTTATTGTAACTTGAGTTTTGATGC[T/G]TTAACTTTTCATATTAGGTATGTTTATTTG
>A01_795002
CGAGGTTGAAGCTGCTAGGTAAATGTCTTT[A/C]TGATTGATTCCACAACACACATTGTTAGAA
>A01_795404
AAATTATATACTATAGTTTCTACCTTAAAT[A/T]TCTTCGTTTGTTATAAACATTTTTTTCTTT
>A01_795486
TTCTCTTCATCCTAATGAGATTCTTGGATT[A/G]GGTCAAACCGGAATGGTTAACCATATCCCA
>A01_795957
CCTTTAAAAGCACCCCTATGGTCTTGGTCA[C/T]TAAATTAATTATCGGCTTTTCGTGTGTTTA
>A01_796004
TTTTCGTGTGTTTATTTCTCTTAAACGTCT[C/T]GTTAATTTGGCCAAGAAATTTTCTCAGGAA
>A01_796878
AAAGATGTATAGTAGTACTATCTAACAGAG[T/A]TTTAAATAATGCTATAGATATTTTACCGAC
>A01_796929
TTTTACCGACAGAAAAACGGTTATATTTAT[C/T]TTTACAGCATTAATGGTGAGACGAGAGAGA
>A01_796963
ACAGCATTAATGGTGAGACGAGAGAGAGAA[A/T]CAGAAGTAGATTGGTACTGATGTTTCCCTA
>A01_797621
CATGAAAGCTTTCCTAGATTTCATATTTAT[C/T]CTGTGTAATTTGTTCCTCCTTAAAATCTAG
>A01_797684
TCATGTTTCTGGTCATATAGTAAGATATTT[C/A]TATATGTAAGTAAGTACATCTGCCTTTTTG
>A01_798200
ACATTTTTAATTTATATTTTACTTTTAAAC[G/A]AAACAAATTAATTAAAGCTAGAATATCAAT
>A01_798325
ATATCTAGTAGTATTATATTTTCACCAAAA[G/A]CACTATATGTAAAATTCTGAAACAATAGTA
>A01_798361
TATGTAAAATTCTGAAACAATAGTATTTCT[T/C]TTACAATATATGAAAAGATGATATCAATTA
>A01_798425
AAAACTTTTCAAGTATTTGAAGAGACATTT[T/G]TAGAGGAATCATCACGTGTATACACATGTA
>A01_798604
GACTTCCTGGGGAATTTCGAAACTTTATAT[T/G]TAGTTTAGTCAAACAATAATTTTAATCATA
>A01_799263
TCGGCATATCAGTAATATTCATTTGTTTTA[A/G]ATCTTAAATAGGATATGTCTGATCGAACAA
>A01_799342
TGAACCATGTGAACCTTTTTGTAAAAAATA[C/G]TATTGTTTATTTTTCATTGTATAGTTTATT
>A01_799987
CTCATGCTTTGTCGAGAAAGACTCTAAAAA[T/C]AAAAGAAACATTAGACTGTAATTTACATTA
>A01_800145
AATATCTACCAAGTTACACTTTAAGATCTC[C/T]TTTTGCATCGTATCTACGAAGTACTGTTTA
>A01_800443
TGTCCGAAAATATCTAGAAATATAAAGGCA[G/A]CGAACGAATAGTTTTGATAATTTGAAATTT
>A01_800495
TTGAAATTTATAAAAATATATTGATGACTA[T/C]GCCATTTGATTTTTTTTACCGGTTAAAATA
>A01_801041
CTAAGTAAGGAGTAGATTCAGGTTATAGAA[C/T]ATTTACTATTCATAATTAATCCTTATATAC
>A01_801084
TAATTAATCCTTATATACTGTGTGAACTCT[A/G]TTTTTACTATCGTTTTCAGATGTCAGAAAC
>A01_801129
TTCAGATGTCAGAAACCAATAAGAATGAAA[A/G]CAAAATATCTAAACCGTAAAACCATATTGA
>A01_801314
TCTTGACTCTAAACGAATGAAAGGTGTTTT[T/C]ACATCCTGATATGTTTTAAAAGAGTCAGTA
>A01_801442
TTTTGCTTATTTTGACAACTTTATAAAATT[A/T]CATAAAAATAGAAAATCTAGTGGTCCATCT
>A01_801569
TTCTCTAAATTCAATCCCTTTCATAATTCT[T/C]CACCTCGTTTATGAATTCATAAGTTGCAAT
>A01_801618
ATAAGTTGCAATTTTATCATAAGAGTTGTA[C/G]ACTGTAGGTTCAAAATACTAACTACGAAAC
>A01_801692
AGATGATGTTGATCATTTATCGTATTATAC[G/A]AGTGATACCTTACGGTTCATACAACTTTCC
>A01_801745
AACTTTCCTATAAAAAGCAATCCAACTTTG[C/T]CAAGTTGCGAGAAGTTAGTTTAACTAGTTA
>A01_801794
TTTAACTAGTTAGAGAAATGTGGAATCAAT[G/A]GATGTTTGAGAATAATAAACGAAAATGACC
>A01_801853
CCTTCTTGAAGAATGGGCCTATTAGCTAAG[G/A]CCGTATATATTAAACAGAATCTGAGGATAT
>A01_801901
AATCTGAGGATATTGGGCTACAAAATGTAA[C/T]GGACCTAACCCCAAAATAGTTAAATTGAGT
>A01_802567
TCAAAGATTCAAGAGATTCTGATTGCATTT[C/A]TCTACTTGTTTTTGAAATAGAGGCTTTTGC
>A01_802698
GTCGGAAGCCCTTCAGGTGGAAGCGATCTC[A/G]GTAAAAACTCTCTTTTACTTCATATTCAAA
>A01_803194
ACTTTTGTAGTTATACGATTATTGTCTTAG[G/C]GTATAAACTACTCCATCCGTTTCAATATAA
>A01_803583
TTGGCGTTTCCCTTTGGAAGGACGACGTTG[G/A]TCATAATAACCTCCACCTCGGCTGGGATAT
>A01_804463
CGATTGTCTGAACGCGTGTGACTAACGCAT[A/G]GAGAATCGCGCGTTCAACGCAGAGAGTCAA
>A01_804631
GCTAGGGCTTGTACTGATGTAACAATGAAA[T/C]CGCAACACGTGTACTTTATGCTCGTCTTGG
>A01_804701
AAAAGGACGGTGTCACACCGGATCACAGCA[C/A]CTTCCACCTTCTTCTCTTTATCTCTCGTGA
>A01_805086
ACCTTTCTTCTCTTAGCTTACATTCGATTG[G/A]TTTAAAAGACAGAGAAATGAAATACACCTA
>A01_805397
TTTATAGTACATACTTTTACCAACCAGTTG[A/C]AAGTTGAAACCATCTTTTAAAAAAGCCTTT
>A01_805464
AAATGATGATTAAAGCTTTATACTAATTAG[A/G]TTCCAAGTGGGGAGTTATCTCGGGGGTCTC
>A01_806242
AATAACATAAATTGTTATATAATCACTTAA[C/T]CAGACTCTAGCATGTCCCTAGGATTACTTC
>A01_806321
AAACAGATAATCACTTAATCAGCTTTTGAC[A/C]TTAAAATCGTTATAAAAATAATATGAAGGC
>A01_806388
TGAAAAAATGCTGCAGGCTTTTAGCAACTG[T/C]CTCCCATATGCTTTATCTTTGTTTCAGAAA
>A01_807434
TCATATATGTATATATAAATTTTTTGTTAA[C/T]ATTAACTGCAGAATTGTAAACATTTAAGTC
>A01_808490
TCTCCGGCATATTTTCGACCGTTCTTCTCC[G/T]TTACCTTCTTACTACTCTCCGGCCATGACC
>A01_808746
AGCTCGGGGACTCGTGTTTCGTCTTCTTCC[C/A]TTGGAGCTAGCGGGAACGAGACCGACGAGT
>A01_808901
ACAGTGATTTTTCTCTTAACGGATCTGTAC[T/G]CTTTTTTTTTCCCACCTTAATTGTCTGAAT
>A01_809419
TTAAAGATTAACTAATTAATTTGTTATAAC[T/G]AAATATATATTGGTCTATTATCTGTGGCGG
>A01_809554
TTATGCTTACCTGGAACTTCATTACACCCA[T/C]TGCAACTCTCACAGATCCGACCTCCAGAAA
>A01_809975
ACAATGTTAAAAAATGTTCCGACATTTTGG[T/C]AATTTGCAGGAGAACATGCTGCGTTTGATG
>A01_810135
CATGACAATGAAAATGCATTTAGCGTCTTT[T/A]ATATTTTTATAATTCTCTATATCTTTGTTG
>A01_810308
CATTGTATTGGGGCCTCTAGTTATAGATAA[A/G]TGTCTAAATAACTTTTCTAATCAAATGATA
>A01_810430
CCACTCATATTATAGATAAAATAAATTTTC[T/A]TTGCACCATCAAGAGAAAGTAGAACTGAGA
>A01_810624
ATCCATTTCCTCTGGCTCAATGAAGCTCCT[A/G]TGTCCTGTCGGTGAGCTGCATTTAGATTTC
>A01_811192
GGCCTAACCCAATTATAATGTCTAAAAAAC[C/T]AATCCAAATGCCGAAATTCTATAGCTACAT
>A01_811235
GAAATTCTATAGCTACATTCTTAGCTCAAT[G/T]GTTCTGTTTTTTTTTTAACTGAAAATTATT
>A01_811278
TTTTAACTGAAAATTATTTATTATTTAGAT[T/A]GTAACCAAATTACATAAATACATATACAAC
>A01_811572
GCTCATGAGAATCAGCTCAAATGTATTGGG[T/C]CTAACCCAATTATAATGTCTAAAAACTAAC
>A01_811698
ACTGGCTCCCCATATCAACAAAATGAGCAA[T/C]GAAAGGAGATAGAAACACATGCGCTCTCTT
>A01_811871
GGTGGCAAAAGAATTATTCCATCTTTCAAC[G/A]TCTGACACTTTCATTAGTTAACTATAACCG
>A01_812159
ACTTGGTCTTTCTCCACTAATTAAACTACT[G/A]TACTACTCCCTTCAACCTCACGTACGTTGA
>A01_812485
CTGAGCCGTCCATCTCTCCACCGGGTCTTT[A/G]ACGAAACACCTCCTCACGAAATCTTTCCCT
>A01_812611
TACGTTCCCAACTCCTTCCTCCAAACACCA[C/T]GCCGTTTTGCCACTCGACATCTCAACTACA
>A01_812821
GTCGCCGAACACCAAAACATTCTCAAGCTT[C/T]ACATCGCAATGAGAGTAACCATTCGCGTGG
>A01_813454
GCCTATTACTGTATAGTTATTTGTTATTTG[C/G]TCTTGGCCACGAGATAAAATAGCGGCAAAT
>A01_813861
GGGTAAATATCCAGAGGAGAGATCTTGATT[A/G]TTTTTTCCTGACGTGAACTATTTTTCATAT
>A01_813928
GAATATTGATTATCTTTTAGAATAAATTAT[G/A]TAATGGTCAAAATAATTGTAGAACAGCTTC
>A01_814037
CGTAGGCAAGTTCCTAAACCCTGGTTTTAG[T/C]AGAGAAGGTTCGCTTCCTACTGTAGAAGAA
>A01_814302
CATGAGGGCTACCAGAATGAACTTGAAACG[G/T]CACCATGTAGTTAATTTATCACCTACTACT
>A01_814382
TCATACAAACATCACATATATATATATGCC[G/C]ACAAAATTTGGTGCCTAAAGTATGGGTCTT
>A01_814675
AGTTAAAAGGCCTAAATTTTATGTAACTAT[C/T]AAGATGGGCTTAAGACAACAAAAAAGACAA
>A01_814747
GTTGCTCATCTCATGGAAAGGAAGCTTGTG[G/T]TTTTTCTTTGCTCAATCGCATTGATATTTT
>A01_815197
ATGTTAATTGTGACAGGAAGAGATGAGACA[G/T]CCTGCCAAAAAGGCGACAAGGATCTTTGTT
>A01_815915
ATTCCAAACCAAACTAACAAAAATCCGAAT[C/A]GAAATAACTGAAATTAACCATTCTTTTTTT
>A01_816009
CCAAAAATTTTGGTTAAATTTTTTGAAACC[G/A]AACTAACCGGAAACTAATTTTATTTTTTGT
>A01_816436
CCGGACAAGATGAGTGATCTTCACTGAGTT[C/T]CTAGAGACTTGTTGCTGTTCTTGTTGATGG
>A01_816487
TTGTTGATGGTCACTGGACACTGAAACTGA[G/A]CTTCTCCTCATCTCCTGCGCCTTCAACTTC
>A01_816574
ATCCATAGATGCTGACTTCTTCTTCTCCAG[C/T]TTCACCTGTCATTCAAAGATTCAGTACAAT
>A01_816639
CTCATGCTGACTATACAAAAGGTAGAGAAG[G/A]AGGAGGACCTCAAGTTTTCTAATGGCAGCT
>A01_816917
CCTCAGGAGGCTGCTCCTCTCTCCTCATAA[C/T]AACCCTCGAAGAAGAAGACATGACTCTTCT
>A01_817575
AGGATGAGGGAGCGTGGGAGGAACAATGGG[G/A]CCGCTTTTGGACTTCTGCCGTCTCTGTTCG
>A01_817605
GCCGCTTTTGGACTTCTGCCGTCTCTGTTC[G/A]GAGAACTGAGAGCTCAGGTTTGCGCAGACG
>A01_817855
TCGGAGCTCCAGCCTTTGTTGTCGGAGTAG[C/G]TACTCGGAGCTGCTCCGGGGCTTAGGAAGC
>A01_818762
TTTATCCTTGTTATTTGTTTTGATCCTCTG[C/T]AGCGTTACACAAAGCCACAACTCTTCCCAT
>A01_818948
TTCTTATATAGATTTGTATGTACTGTAACT[T/C]CCTGCAGACCTAGAAAGAAGGATCGTAGCC
>A01_819227
GTAGCCACTTTTGAAGACATTTCACATGTA[A/T]TATACGACGGATATACCAACATACTTAATT
>A01_819481
GTATTGAAAGCATAGGGATGATCAAGCACA[G/C]AGACACAGACGACAAAACACACTAGTCTCT
>A01_820160
TTGTTTGCTACCATTGATGCAAAACAGCTA[T/A]AGTATGACACAATGTCGCAGTCGAACTTTA
>A01_820219
TATTCAGGATAGAAAAGTAAGAAAACAAGA[A/T]AACACACATAACAAATATATAAAAATATAG
>A01_820975
TAGCAAATGGGAGTGAACTTATATGCAAAA[G/C]AACACTTTAAGTTCTTACTCTGTTGCGTTA
>A01_821067
TTGCGGAGTTTCTTTCTTCTCCGCTGGCGT[T/C]TGCTTCGAAGATCCTCCCAAGGAGGTACCT
>A01_821442
CCAAAATCTAGTGCTAATATACACAACAAA[C/A]GTTTCCTCGAACAATAAATGGGGAGTAAGT
>A01_821719
GGGATCTGGATCTTGATCTGTGAACAGAAG[C/A]AATAAGAGATAAGCAATCACTTTCCATAGA
>A01_821763
CAATCACTTTCCATAGATTGTATGACATAA[G/T]AACAGGTTAGTAAGGGAAAAACCTTCTTGA
>A01_822581
AGTTTAGCCTCAAGCTCTTGATTAACGTGT[A/T]GCAAACCCTCTCCATCAGAAACTGTTCACA
>A01_822803
ACTTCCTCCTCCTCCTCCGACTTCTTATGC[A/G]GCCGCATGCTTCTCGAACCAGCCTCCCTCA
>A01_822975
ATCGATCATAACATCCTGCTTCCCGTTCCA[C/A]GGTATCCTGATTCAACAAAGTCAATTGAGA
>A01_823691
AGAAAGAACATATTAAATCTTACTATGATC[C/A]GAATTTAGAATACCTTTGATTAGTACCAGA
>A01_823857
ATATTAATGTGAGTGGACACCAAACTTTAA[G/A]AAATTAGCAATAAATTATCTAACCAAATAA
>A01_824274
TCATTTCTTGGACCACTTTGTTGGTTTAAA[T/C]GTCGGTTTAGAGTTTTTTTTCCTTCAGATC
>A01_824404
TAAGAGAGATAGAAAAACGAGAACAAATCC[A/C]AGTGAGTCCTCTCCAGGCTAAAGAGATATG
>A01_824570
GGTGTTTATGAAGGCAAAACACTGGTCCAA[G/T]TGGGACCTCTGAGTTGACAATGGGCTATTA
>A01_825529
TAATGGTTCGGGACTTCGTATTTGTATATC[T/A]TGATAGAAAATCAGAATAGTAGAAAAATTA
>A01_825882
TTCAATAAACAAAGAAGCTTATAAATCATT[A/T]GCTGTAAGAAATGTGAAAGAGTGTAAAATT
>A01_825934
TGTAAAATTCTAAAACTATATACTTCAACT[C/T]GGGTATAGAAAGAAAAAAAAAAGCCTATCA
>A01_826027
TAATGCCATTACCTATGATTTTCTTGTATA[C/T]AAGTGGAGCTTCCGTAGTGAAACTCTCAAA
>A01_826358
TATCAATAACAATGTGTTACTTTGAGGTCC[G/A]AATGGAGATGTACATGCATGCAAGTTGCAA
>A01_826555
TATTCAAGTCTCGAATTAGCGCAAATTATA[A/T]AACTTTTTTTAAATCAACCATGTGCATGCA
>A01_827003
GATTGGTACCCAAATGTGAATTGAAGCCAA[A/G]ATGTGTTAGGTGGCGCATTAAAATATTCAA
>A01_827173
CTATACTTTCTAGAATACATATTATATTCG[C/T]TTGTTGTGTGTGCGTATTTATTTTAATTGG
>A01_827266
ATAATTTCAGTATAAAACTATATTACATAT[G/C]ACATTAGTTTTTTCTGTCAGCATATATACG
>A01_827609
TTTTGTTTGCTAAAAACTTTAGAAAAAAAA[A/T]ATACACTTCTAACTTTGGTTTAGTTTTGTA
>A01_827989
TGTTCCGGCGCCGTTTTTAAGCAAAACGTA[T/C]CAGCTAGTGGATGATCAGAGCACAGACGAC
>A01_828306
TTTTAATTTTTAATAGGGTTTCCGGAAAAC[G/T]GTACCGGACAAGTGGGAGTTCGCTAACGAC
>A01_829008
GACACGTCATTGACGAAGAGAAGAAAAAAG[A/T]GAAAGCTGCAAGTTTTAATGATTTTTAATA
>A01_829143
GTATTAAGTTTGAAAAAAAATAAGACAAAA[C/T]GTTTCGGATTTTTACTATTGGGTGTATCTA
>A01_829178
CGGATTTTTACTATTGGGTGTATCTACTTT[T/G]CTCTTAAAAACTTCTAGCTAATGTAAAAGC
>A01_829343
TTTATACGTAACCCGTCGAATATTTTCATA[C/T]TAATTGTCAGAAAAGTCGACAACAAAGACA
>A01_829584
TAGATATATTCTAAAATTTTGTCGCTTAAT[G/A]AATCCTAACCCATTTTCTTACATAATAAAC
>A01_829688
CAATTAAGTCGCTCTTGAGTCTTGCCAAGA[C/G]TAGAACATCATTTTAGTAGAAAATCAATAC
>A01_829733
AGTAGAAAATCAATACCCACTAACTCTCAA[G/A]CATTAGAAAACATAGTATCTTTCTATGTTT
>A01_830003
TGACAATTGGCAAAATATCTTTTTATACTT[T/C]GAGAAAGTGTAAATAATTCTAAAGAAGTGT
>A01_830097
AGCCACATATAATAAAAGATGGCGATGATA[T/A]TTTGCAACACTCTCTACTCTTCTTCTCCGT
>A01_830221
AAGCTCAATTCCAGTCCATGGAGAATCAAA[A/C]CGATCTTCTCCTCCGTCAGAAATTCATGGA
>A01_830258
TCTCCTCCGTCAGAAATTCATGGAGTTTCC[T/A]TACGTCTCGCCCACGCGCAGGGAGCTAATG
>A01_830549
GCATGCTGGTTTTAGAGTTTCAGTTGCATG[A/T]TTCAGACAGAACCAGAGTTCAGTTTTGTAA
>A01_830770
CCTAAACTCGTCAACAGAAGCTCCAAACTT[C/T]GTGGTCGAACTCATACAGAGCAGTCCCACG
>A01_830803
GGTCGAACTCATACAGAGCAGTCCCACGTC[T/G]CTCGTTCTCATCCTCGACCTCCCTCATCGC
>A01_830871
TAGTTCGTCACCCTGACTATCTCCAGACCT[T/A]TTACCAAGACACCGCTCTCGATACTCATCG
>A01_831406
GTGTCCTTTAGATAATGTTATATATATTTT[T/A]AAAATATTTTATTTGTTTTGAGTATCTGAT
>A01_831973
ATTAAACCAGTTTACCCAAATCTAAATCAG[A/G]AGCACATGATTTTAGTCCTTCATTTCACAT
>A01_832567
GGAGCTAGGAGAAAATTTCACAGATAATGA[A/G]ATAGAAGAAATGATCGAAGAAGCAGATCGT
>A01_834596
CCATTAAAAGCCCATTATTATTCGAGCCCA[C/A]ATTAAAATTAGATAGAAAAGAAAGTAAGTG
>A01_834823
CTCTCTCTATTCATACTTCTACCACTACTA[G/C]TTAGCTGAGCAGAATTTTTATTACAAAAAG
>A01_835422
TCCTTACGTTGAGTCTTTTAACGTCCCCGG[T/A]ATCTCGAGTGGACTTGAGATTCACGACGAG
>A01_835700
GGGTGTGACTACAGATGAGATTGATGAGGC[G/T]GTTCACAACATGATCATCGAGAACGGAGCT
>A01_836165
ATGTGGACCTGGTGTTGAGTACAAGAAAAT[C/A]GGCAAAATCATTCAGTAAGAGACTAATTTC
>A01_836207
TCAGTAAGAGACTAATTTCTCTAAGCAATT[A/T]GTATTTTTAATTAATGAGTATCTCATCAAA
>A01_836257
ATCTCATCAAATCAAATCTTTGTGAAGTGA[T/G]CATGCAGATAAATATAAATATGGAGTGGTT
>A01_836599
TCTTATAACCAAAGATGGAGCTGAGATACT[C/T]ACCGACTGTTAGAAAAAATTGATTCCCAAG
>A01_836663
GTCTCAGATTGATCTTTATTGGATGGAATA[C/T]AAAACCAAATGGTATGTATGAAAATCACAC
>A01_837033
AGTTTCGAGATTGACACGAGACACATTTTT[C/A]TTCAGTAAAGCTTTACCAACTTCAACAAGA
>A01_837964
TGGGCTTATGTCTCCCATTGCTGGATTCTT[T/C]TTCACTATCTGCTTTGTCACTTCCGCAATC
>A01_838013
ACTTCCGCAATCGCACACAGCGTCTACAAC[A/G]TATAAACAACATAACATGACCAATAGATAA
>A01_839029
TTACATTATGAAATTGAGACGATATCCTAA[G/C]ATGACTTATTTAGATTCAAGTAGACATACC
>A01_839734
ATTATGAACTCTTTGCTTAATTTATGTTAT[A/T]AAAAATTGGGTTAACATCCTGAAATTGCTA
>A01_839897
CGTGTAGAGACAACGAGAACCACACTTTTC[A/G]GGCAAATGTAACCGCTACACGAAACAATAA
>A01_840221
AAATCAAAATACTAAGCAATAAAAGTCAAA[G/T]TTTAATTTGAAGTCCAGGTTTTAAGAATAT
>A01_840448
TAATACATCGATTTCTTTTACAAAAAAAAA[A/G]AGTAATACATCGATTTTCAGTATTTTATTT
>A01_840570
ACGTCAAATGTTTTCGCGTTAATTACAAAA[C/A]GAAATACAAATTTAGTCTTAATCATTCGAT
>A01_840648
CGCCCTCCTATGCAATTCTTCACGTATCTA[G/A]TTTCCTTTAATTGACCTTTTAATTTTTTAA
>A01_841087
ATTAATTTTATCTTTACTATTATTTGTAAA[A/G]CAAATTATTCTTTATGCAACTAATCACAAC
>A01_841268
ACTCAAACGATGCGATGACAATTGATCCAA[G/A]AATCGATCAACAAAATTTGAAATTTACCTC
>A01_842575
TTATATATCTCAACGTGGAATTTTATATAA[A/G]TGACAAGTGTTCATTGGAAAAATGAAATAA
>A01_843644
GTTTGTATATATATATATATATAAATGCAA[T/G]TTTTTTTGTTTGAAACTAACATGCAATTTT
>A01_843692
AACATGCAATTTTACGTGTCAAGGATTCTA[G/A]GAAATAATTTTTTTGGTCAAACTTTTCTTC
>A01_844142
ATTTTATAATGAATGATTATTTCAAAAAAA[A/T]TTATTCATTTGATTGGAAATTAAATGTCAA
>A01_845341
TAATCACACAAAAGATGGCCGAGTAATCAC[G/A]CACAAAAGATAGCCGAGTATCACACACACA
>A01_845418
ATATCTCTGTCTTCCACATATTATTCATTA[G/A]GATCAGTTTGATGGATCTTGAACCATTGTT
>A01_845752
CTTCACAAGATTCTCCAAGTTAGATTTTGT[T/C]GCTAGATCCATCGAACTTACATCTCCTTCC
>A01_847148
AAGTTTATTATTAGATTTTCCATTTTATAA[C/T]GAGCTAAATCTATTGTTGGTTTGACTACGT
>A01_847460
AGTCATGAGACCACCGGTACTAGTCCCTGA[A/T]ACCACGTCGAAATAATCAGCTAGTCTCACG
>A01_847557
AATGATACTACCATCTTTTGAGAAAATGTT[T/A]AAATATTCACATCTATAACTAATCGCATCT
>A01_847662
ACACTATTTACCGTCAGATATATGCTCAAA[A/G]ATATATATATAGAATATCGGGTACATATGA
>A01_847710
CGGGTACATATGATATAACCTGAAGTTTTT[A/T]TTTTTGAGAAAGGGCTTTATAACCTGAAGT
>A01_847761
AACCTGAAGTTGTTTTTCTAGATAAGCAAG[A/G]ATGACTCCGGCAATGATTCCTCGAACCCCG
>A01_848233
TGTGGACTTTCCAATAAAAAATAGTTACCA[T/A]GATTTAAAACTCAATTATTTGATTCTTTAA
>A01_848433
TTAGCAAAGATATATTAAGTTCATATTTCT[T/C]CACTTCCCTGGTTTGCTTTAGGCTTGATTT
>A01_848465
ACTTCCCTGGTTTGCTTTAGGCTTGATTTG[T/C]TAGCTTTATAAATAAGAAAAAATGTAAAAT
>A01_848562
TAATCAGATTGGTCAAAAGTCAAAAACATT[T/C]GACACAACAAACCTAGCAAAGCATTTGGTT
>A01_848655
TGAGATTGCTGGTTATCTTCACTTACACGT[C/G]TATTCCAAATTATCCAATTTTAAATTGGGC
>A01_848814
AATTACGTTTGCTAACTATGAAACTGTTTT[A/T]TTTTTTTTGTCAAAGGCTAACTATGAAACT
>A01_850138
GTCATAATATCGAAGGTGTTGGATTCGAGT[T/C]GTGTATAGAAGATTGAAGACTTTCGAGTAG
>A01_850680
TCTATAAGATTTGCAATATATTATTTAAAA[G/A]AGCAAATATTTTCAAATAAAAGAATAATAA
>A01_850936
TGATGTAAATGCGAACAGGAATTTTATATC[T/A]TTGTTTTTCCAATTTGAAGGAAAAATATAA
>A01_851009
TTTTTCGTCGCCATTTGTATAGTAGCTGAC[T/C]ATAATATTTATTATAAAATTCTAATATAAT
>A01_851377
ATGTGTTATAAGTTTTCTATACCCCCAATA[C/T]TTCTAACTCTACAGTTTTAATCTTTTTTTT
>A01_852006
GTCACGTGCTAATGCTGCTTTAGTAGAATC[T/A]GCCAAAGTAGTATCATTAAATCCCGTTTCA
>A01_852136
ATGTTAGTTGATTAAAGTAATCAATTGTAT[T/C]GATGGTGTAATACTACCACGCCTAGCCTCG
>A01_853587
CTCAGATCTCACATCTTCACTCACACCTCT[A/T]TAAAAAAAACATTAATTAAATAGCAGAAAA
>A01_853688
TCTTCACCTCCAATAAGAGATTCTGTAACC[C/T]TTCTTCCTCTCCCTCTGTTCAAGAACTATC
>A01_853864
ATCTTCAAGTTTTCCCGCTCTCTGTTTCAT[T/C]AACCCAAGAGGTAATAGTACTAAATTTCTA
>A01_853937
TTAATTAATGTCGGAAAAGTTTAATATTTT[C/A]TATTACAGCCACTTAAAACTGTATCTTTCT
>A01_853978
ACTTAAAACTGTATCTTTCTTTTTACTTCT[A/G]CTGTTTTGTGTTTTTTAAATATCTTTGATG
>A01_855153
ACACCAGAGATCAAAATCAATGTCCCAACA[C/T]GAGTTCAATTCCATGATCACTCCTCCTAAA
>A01_855225
ACAGTCTCTTAGTTTCAGCAGAAGCGTCTC[G/A]TCAAGTAGGAAACTCTTCTCCACTGATCAG
>A01_855376
AAGAAGCCTCTGGTTAAGCCAGAGGCTGCT[T/G]TTCAGATAGATGATAGATTAGAAGAACAAG
>A01_855639
AATTGATCTTGGAAGAAGAACCAATGCTTC[A/T]TTTCTCATCCATCGTCTCAAGTAAGTAATC
>A01_855705
TTAAACAAATGATTTGAATACTATTAAACT[A/C]ATGTTTTTGTGTGTGTTAATGTTCTTATCT
>A01_856329
GCTCTCGCATGTGGAAGCTGGTCCTCTCCT[G/A]CTGTAAGGGTATACACAGCAGCTAATGTAG
>A01_856376
AGCAGCTAATGTAGAGGAGGAGCTAGAAGC[T/A]GCAAAGAGAGATTATCTCCAAGCATCAGTT
>A01_856415
AGATTATCTCCAAGCATCAGTTGGGATCTC[C/A]AAAAAGAACAAACTAATGCTTCCAAAGGTG
>A01_856469
AAAGGTGTTAGATTGGTATCTCCTAGACTT[T/C]GCAAAGGATTTGGAGTCGTTGCTGGATTGG
>A01_856619
AGTAGTACCGTATGACTTCAGTTTCAGGTT[G/A]CTGCTATTGCATCAGTGATAAAAGGTTTGT
>A01_857260
AAGTAAGAATCGAAATCAGCTGTGTGAATT[T/A]GCGGGAGCCGTTAAACCCTAGAAAGCACCA
>A01_857719
GAGTTTATGTAAGAAGAAGAAAGTTTCTTC[C/T]TTTGATAGTTAATTATCACTTTGATCTTAG
>A01_857934
ACTTAAGAGGGTTGAGTTTGAAATGTTGTG[G/A]ATTTTTGTAAATGAGATTGCTTTCGCTGCT
>A01_858152
AAACATCATAGACTTTCTTGCTCAGCGGGA[C/G]AAGTAAATTTAACTCTTTGATCTCTCTTTT
>A01_858190
TTTAACTCTTTGATCTCTCTTTTTCTCGTT[A/T]TGCATATAAACACTGTCTACTAGAAAACAG
>A01_858297
TGAACAAGAGGAGGCCAACAAAGAACACCC[G/C]AGAAAGAAAAAGCAAAAGAGCTCAGGGTAC
>A01_858332
AGAAAAAGCAAAAGAGCTCAGGGTACTAAT[G/C]ACCATCTTCTTACACACTCTAGCTTCTCTC
>A01_858575
CATCACCGGTGCTGCTTCAACCAAGAAACA[T/G]CGTCAGAAAAAATGAAAACTCTTTAAAAGA
>A01_859123
GAGAGGAGGAGGCAACTTCTTCTTCTTCTT[G/C]TTCTTCTTTGGTTGCCAATCTAGACATGAC
>A01_859174
TAGACATGACAATACCCTCAGTGACCTTGC[C/G]TCACGGCGCCTACAAGTATTTTTCCGTCCA
>A01_859210
GCGCCTACAAGTATTTTTCCGTCCATGGCT[T/C]TATCGCTTGTTTTGAGTTGTCAAATTTCAT
>A01_859278
AACCCTAGCACGGGGCAAGTCGTTACCTTT[T/C]ACTGCAAGGCACCGGGCACATCCTTGGGAT
>A01_859626
CCTGGTTTGGCAGGCTTTTACATCATTGAT[A/C]GAATACAAAGGGAAGCCAGCTGTCGTTGTA
>A01_859682
TTGTACCAATCTGTTTGGGAGAAGGTGGTT[A/C]TGCTTTCGACCGTTTTAATCTTTGGATACT
>A01_859727
TTAATCTTTGGATACTGGAGGATGTGACGA[A/G]ACATGAGTGGTCCAAACAAACATTTGAGCT
>A01_859976
GAGCCGTCATGGACTCATAGGCATATGCTG[C/T]GTCTCTTTCTCACCCCAACACAATGATAGT
>A01_860018
ACCCCAACACAATGATAGTATTGCTTTTTT[G/A]TAAAAATGTGTTTTGTTGATGTGTAAGAGC
>A01_860087
AACAAAACTAAACTCTGGGGATTTTTTTTT[A/T]ATCAAATATTTATGCACCAAACTTGTTTTT
>A01_860283
AATCAGTTATTGTAGTAATTAAAAGAAGAA[G/C]TGCTACATGTTTCTGAATCTTTTCTCTAAC
>A01_861223
GAACTCTCCTTCTGTCTCTCGTCTAATCGC[G/A]CTCTCTTTGATCTCTGATGAACCACCAGAA
>A01_861286
CCTCAAAGGTGCAGTGTGTGTCCCTTTCTC[T/C]GTAACTGACATAACAGCAGCGTCGAACGAG
>A01_861556
CAGCTCCCCAACCGAAACACTCTCAGTCTC[C/T]TCGAAAATCGTCGTGCTGGTAGTCCCATCT
>A01_862234
GAACATTGTTAAAAGACGCTTGTTCGTCTG[G/A]AAAGGGTATGACTCAGCTAAGAGTTTGAAA
>A01_862303
TCTGCTTACAGTGAAGACGAGGCCGTACTC[G/A]CTCTCAGGGATGTTTAAGTAGTCCATGATC
>A01_862345
GTTTAAGTAGTCCATGATCCTGGCTCTGAT[A/G]TCATGCTCCACGGTGGAGCTCTCGGCTCCA
>A01_862774
GAGGAGGGACCCGTTCTCGGAGGCTTCCTC[T/C]AGAGCTTCCCTGAGCTTGTCTTCGTAGAGC
>A01_862835
TTCCGAAGCAAGGCAGCTTCTTTCGTGGCG[G/T]TGAGGGAGGAATCGGAGCCTTCTCTGGTTC
>A01_863032
GAAACTTTTTGATTAGGGTTTGAACAAAAG[T/A]GTAAAGAAACGAAATTGACTGAAGAAGAAG
>A01_863116
AGAAGGAATCCAAGAAAGCTCTCTCTCTCT[G/C]TCTTAGACACTGTTGAAGAAGAAAAGGCAT
>A01_863171
AGGCATTGACTTTCATAAGCAAATAGTGGT[A/G]GTTGGTTCATGAGCTAAAACAAATCATGTA
>A01_865141
TTCTCATTCATATCAATATGAACTTTTATC[C/T]CATTCAAACTTGACTCTTACGACGCAGCCT
>A01_865219
TATTTGGGTTTGGCTCAACAGACATCTTCC[G/T]CTTGCTTTTTGTTTCTCCCTTCTCTTTGTC
>A01_865261
TTTCTCCCTTCTCTTTGTCTCCAGAAGAAG[C/T]CTCAACAGGAGTTGCTGGATGATCCATCTC
>A01_865568
AGTGTCATCAGCTTCATCATCCTCATTTGT[T/C]TCTGACTGCTTCTTGGTCAAAATCAGGTAA
>A01_866068
AAGCTAATAACAAGCCACAACTAACCTGCA[C/T]TGGTGGCAAGTCTTTCCTTTAACGGAATCA
>A01_866107
AGTCTTTCCTTTAACGGAATCATAGATCCG[C/T]TTCCCATCTGGACCGTAACCATCAACAAAA
>A01_866422
TTTCGAAAAGCCCTAATTTTTTTTTGGAAT[C/T]GACGAGAGAGTGTAGTACCTTGAGGATCGT
>A01_866595
AGAGATCCATGATGCCGAGGTTCTGCATCC[G/T]CTGGAGATTCTCCTTGATCCTCTCTTCTCT
>A01_866687
ATTGTTGATTTGACTTTGTGAGTTTTGTTC[G/T]CTGGATAAGAAGAGAAGAAGAACATATGGA
>A01_866841
TAAACGTTTTTTTTTAGGTAAGTGTGCTTA[A/G]TTTGCTAACAAGTGTTTGAATTTGACTGGA
>A01_870899
TCTATTCTCCACCCCACAACAGCCCCAGCA[A/G]CAGACAACAACTCCTTCTCCCTTTCAAACT
>A01_871058
ACAACAACAACAGCAAGTACAGCAGCTGTA[T/C]CTCTTCACGAACGACAAAGCTCCGGCGAGT
>A01_871370
GGAGTACAGAAGCGAGAGTCAGAGGTTAGA[C/T]CAATGCAGTCGTCTTTACGATTCCTCTGTT
>A01_871545
TGGTGGGATTAACACTACAATGGACAGACA[G/A]AAAGCTGTTCTCCACGAGCTTATGGTGGTT
>A01_871944
TCGGCATGTTTCTCTTTTGGAGTCTCTTCC[G/C]AAAGTCATCTCTAACGTCCATGACTTCTTT
>A01_872173
CTGCATCTACCTGCTAATACTGCTACAAGT[A/G]CACAAACCTCAACTCAAGTAGCTGGATTGA
>A01_872268
CTTTCCAACACCAAACCCTTCTTCAGGAGG[T/C]GGGTTGTTTCTTAGCACGCCTGCTTCTGCT
>A01_872605
TCTGTTTCCCCCTTTAGGTATTACACCGGG[T/C]TCAGGAGCCAGCTTCGGTTCTATGACTGTA
>A01_872889
TTTGGTGAAAGTGGGAAACAGATCTCCCCC[C/A]CATAATCTTATGCACCAGTTTGTATCCTAT
>A01_876073
CCCCCTCAAGCTAAGGACCACACACCTTGT[G/A]CCCTTTTTCCTCTAGCGAATCATCTCGGTG
>A01_877316
GATATGGTAAGTTGGACCAACGGGAAGGGG[G/A]CCAGAGACAGCGTTTTTGGAGCCTAGGTAA
>A01_877482
TGACCAACGTGGACGTCAAGCGACTCATAG[G/C]TTTCCTGAAGAGTGTGAGCGCCTTCTACTT
>A01_877884
TCTTGTTTGTTTTGTATTTTGTGTTAATTT[A/G]GAATATGTACCTTGTGGCTCATTTTGAACC
>A01_878156
TCCGTCTTGCCACGATGTCCTCCTCTGCTT[A/C]ACTCCATTCCTGCTTACAACATATCTATAA
>A01_878268
GGTGATGAGGAAAGGTTCGTCGAGCTTGTT[A/G]ATGAGATTAACAACAATGTTGTTGTTTGTG
>A01_878384
ACCAAAATATAGAAAATACATCAATTAATG[T/C]CAATTTCTCTTAACAACGGTACTAAATCTA
>A01_878422
TCTTAACAACGGTACTAAATCTAATGTATA[C/A]AAATCAAAGTCTATATATTTATACCTGTTG
>A01_878495
AGGAGATCTTGTTCCATAAGTAACAGTCCA[A/T]GTATAGAACAGATATGGATCTTCTGCACTG
>A01_879871
TACCTTAAGCTTCCACAAAACATTAATCTT[C/A]AACATAATACAGTGTACAATTTCTCTGCTA
>A01_879903
ACATAATACAGTGTACAATTTCTCTGCTAA[G/T]TAGTTATTTCGTTACCAATAGTCTCTACAA
>A01_879939
ATTTCGTTACCAATAGTCTCTACAAGAACA[T/A]TGTCCATTTTCAAAGCAATGAAACCGAGCA
>A01_880043
ACTTAATAGCACTGTGACAATCAACACAAG[C/A]CCTCAAGTTCTTGAACACCTTAACCCCCGT
>A01_880158
CACAAGATTCTCTTCCTTCTGCTCATCTTC[C/A]ACATCGTGCAACACAAGATTCGTAGCTGGA
>A01_880291
GAAGTATCCCCCGCTATAAACACGTGACGC[A/T]TACGTTTTACCTCGGTCCAGCTCGAACCGG
>A01_880685
TCGAATGGAAGTACTCGAGTCCCTTCTCGA[G/C]CAGCCCTGCATGAGTACAAGCGGAGAGGAC
>A01_881484
CTCAGGCATTTCATCGAACACCTTCCTCGC[T/C]TCCTCGACCAACCCAGCCTCCGCGTAACCG
>A01_881988
AATCGTTTGATTCATCTTTCACGAAGAAGA[C/A]AAAAAACAACGGCGGAATGTAGTTGCAGAC
>A01_882472
TTAGTCTTACTGGTGGATTCAATTCATTAA[T/A]TCTCCCAACAAATATAACTTCAAATTTATG
>A01_882553
AGTTTTAATCGATTTATGGTGATCAAGGTG[G/C]TAAAGCCTTCATTTTAAGTTTTGTATTCTG
>A01_882642
TTGGTTAGTATTATTAACGTTTTAGGTAGA[C/T]AAAATTAACTATTTTTTAAGTCCTACTGAT
>A01_882792
GTAATGTATATGGATTTTAATCTGTAGGTT[G/T]TGGGATAGTTTAGGAATTATGATGTATGTA
>A01_883112
AAAAATAAAATAAAAGGAATGGATTGAAAA[G/A]AACTAATACAAAAGGTTAAGGACACGTTTC
>A01_883275
ATGTCCTGCAATAGTTGGCTACAAATAGCC[G/C]TTTTTTTATGTCCGTCCGTTAGATTCCTTG
>A01_883312
TATGTCCGTCCGTTAGATTCCTTGTGGTTA[T/G]ACATATTACATGCATGCTATGGTGTGTTCC
>A01_883522
GAAAGATCCTTTTTGTTCATTGCTAATTGG[C/T]TAGTGTTCTTGTGTTTTGGAATATTTACAT
>A01_883632
GTACGTAAGTTTTTATTAGTAACAAGCACA[G/A]TGGATGAATACTTAATTTTGCTAAGTCTCC
>A01_883664
GGATGAATACTTAATTTTGCTAAGTCTCCG[T/C]CATTTTTCTAAAAATATATCTCCAAAATGT
>A01_884081
TATAGTTATTTGCATAGTATCGACTATTGT[G/T]ACACTATGATACAATTTCGTTTGAAGAAAC
>A01_884132
TTGAAGAAACAGCATCCATACTAAAATGTA[C/T]AACTTGTTTATGCCTACCCAAATAAAATGC
>A01_884226
ATACTATGGTTACGTGATATCTTTAGACTA[C/T]AGCTCAATGTGAATGTAAATGGACATTGCG
>A01_884587
AGTGCTGATTTAGTCTAAAATATTATATAA[C/T]GAACGTTTATATTCCATTAAATCGTGTTTC
>A01_884780
GACTATAACTCTAAATCTTAGAATGCATGT[G/A]AAATGTGAAACATTTGGTTGATAATTTCTT
>A01_884907
AAACTGCAAATAGAAATTCCAAAATAATCA[T/C]ATGTTACTTTTATATTTTTAATTAAAAGAC
>A01_885017
ATATTTTATTATAAATATATAAACGTAAAT[C/T]CAAACATAGACGGTCAAACTCATTTTGCTA
>A01_885063
AAACTCATTTTGCTAAATCAAACACAAAAC[G/A]TAAATGATAGATACAAACCTAATAAAAACG
>A01_885929
GTAGGGCGGGCCAACCCTAGTTTAGTATAT[T/A]TGAAACTCCTTGTTCCACAAGAAAAACCCA
>A01_886254
TCAACCATCGTTTGTGCATAAAATAGTATA[G/T]AACTATTCATTCTTTCAAAATACCACATTT
>A01_887440
GAAAGAGCAGAGAAGGAGATGGTCACAGGA[T/A]CTTCACCGTAAATTTGTGGATGCTCTTCAC
>A01_887884
AAGTTTGACGAGATCGGATTCACCACAAAG[C/T]CCGCTTGTTGATGGATGTTTGTTCAATAAT
>A01_887983
ACGTAGCTGGAAAAGCGAGTCGAATAAGAA[A/G]AGACAAGCGTTGGATCTTGAGCTTTGAAGA
>A01_888154
TTGTCTGGATGTATAAGTCCTTTTCTTGTT[T/C]TACCGTCGGTAAGAAGGTAAACAACAACCT
>A01_900356
GACAAAGAGTCCAACCTCCTCGTAAGGCAA[G/C]GCTGAAGCGGTTAAATCCTTCAAAGAGATC
>A01_900728
TTGAGTTAGGAGAAAAGGTTGAAACTTTCG[G/A]TTGATTCCGTGAGTAGATGATGGAAGGCGG
>A01_901699
AGAAGCAAGGGAGCTCAAGTGGTGGCCAAG[G/A]AGGTACTCAAATTATATAGACTTGTGCTTG
>A01_902062
TATTCTCTGTGCCCTTGCTGAAATTTCCCT[T/C]GAGAGAGGTTCAGTTTCCTTCTCATCTCAC
>A01_902152
GATAGGTTATTTAACAAATGCAGAGGACAT[T/C]GAGTCTTCTTTGAGTGACTACAAGAAAGCT
>A01_902209
AGCTTTGTCCATCTTAGAGCGATTGGTTGA[A/G]CCAGACAGTCGACACATAGCCGAACTGTAT
>A01_902585
AAAACTCATACTAATGTCAACTTTTGTTTT[T/C]TGCAGCTTGAGGATTTGAGACAACAAGCAG
>A01_903087
TTTTTGGCTTACTATTATTGTTAATCAATC[T/C]ATTTGTTCTCTCTGTGCCTGTAAATGTTAT
>A01_903159
AGATCATTAGTACATGTGGAAAGCCATCAT[C/T]TTGTGGTATAGCTGTTTTCACTTTTGGTTT
>A01_904490
ACGAACTTATACCAAAGCTAGATAAAGTTG[A/G]TCCAACTAATCACAGCATCATGTGAACATC
>A01_904684
AACTTAATTCAATGTCGTTTTTCTTTACAT[T/A]TATAATAAGTATAACCAATTAACACAAACA
>A01_904782
TGCAATGTAGTAAAAAATAAAAGCATACAT[A/T]TTAATGAGATTTGTAATTATAATCTCCTTA
>A01_905788
TTTGGTACATATAGTTATTAGTTCCAAAAA[G/T]AAAATCATATTCAGATTTTAAAGTGAGACT
>A01_905921
CCTGATCATGATGTTGAGAAAATGTATATT[T/A]CTCTTTCTAATACAATAGACGGGAGGGAGG
>A01_905996
CTATATCCTAAATCTTAAGTGTCTGACACA[T/A]ATGCATCGGGTTTGCAAATATGTGGATCTG
>A01_906150
TGAGAACCGATTTTTGGATATTAAAATGTT[T/C]AATTTTGTTAATTAAACCCACCTGCTTGTT
>A01_906743
CAATGTATCTAAACACACAAAACAAGACCC[A/C]AAAAATCAATATATTCCATATCGTATGAAA
>A01_906829
TTAAAATTGATCATTTGGATATTTCAAGTA[T/C]GTCAGATAATAAGAAACTCCAATAATTTTT
>A01_907075
CCACACCAAAAGAGAGAAAAAAACAATCAT[T/A]TCTAAAAACAGAGTAAATGGAAGCCTAAAC
>A01_907555
CAAGTGCATGTATATTTTAGATTATTTACA[G/A]CACAGAAAAGTTATTAATAGAAACAAACAC
>A01_907642
ATATAGAACAAAGACATTATTGTGTACAAA[G/A]TATTAAAACACAAGTTATGAATGTATTACG
>A01_907702
GACTAACAAGCATTGCTTCGACAGTCCAGC[A/T]TCATCTTTTTCATCTGACTTGTATGTAATA
>A01_907870
CATATTGAGCATAGTGTCCATAGTTTATAT[T/C]AACTGAGAGAGTTTAGATGATTAGTTTCAG
>A01_907996
TCGTTTGACCCAAAAGAACATGAAAACAAT[T/A]GTAGTATACTAGTATTAGCTAAACGCTTCA
>A01_908081
GTTGACAATTAACCACCTATTGGCCGACGC[T/A]TCATCCAAATTCCAATAAACAACCAAATAA
>A01_909018
ATGTTTTTTTTCTCCCACCTTCCTTTTTTC[A/G]TTGAGTAAATGCCTCTACGTATAAATTAGA
>A01_909104
ACCTAATTGGTAAACCAAAACTGCAAACAG[A/G]TCTACTTGCAAGGAATATGTGAAACCATGG
>A01_909153
GTGAAACCATGGTCGCAAAAGAAAAAATGC[C/T]TACTATATTTAGCTTAAGTCATGGCCACTT
>A01_909680
CAAAATAAGTGTGTTCTTCATAATACACTC[A/G]TAAACCCAGCTATTACACGCATATTTATTT
>A01_911664
TGGTCAGATATACTTCGCTCTTCCTCTTCG[T/C]TATCTTCGTCAGCCACTTCAAGCGGAGGAG
>A01_911700
TCGTCAGCCACTTCAAGCGGAGGAGATGGC[C/T]GCATTGGCCGCTAAAGCTAACTCTGCGTTC
>A01_912133
GATTTGTGACATTTGTCGAACTCAATTCTT[G/A]TTCCTACACTTTTCCTCTATCTCAAGAAGA
>A01_914138
GCAAGGATACAAGACGGTCGACAGGTGGCT[C/T]CTGTACCTTTCTTGGCTCAAACCTAATATC
>A01_915366
GGAAACTTGTTCTTCTCTCATGTATTAGCT[A/T]CGATATGGCTTGTAATTCATCTGGCTGCGA
>A01_915427
GTCCGGTGGTTGCTATGGCCGTGAGAAGGA[T/A]AATGGATGCAAGGTGGTTGATGTTAAGGAG
>A01_916048
GACCGGTCCTGCCTATGTTGGTTGTTTGAT[A/C]ATTTTTGTGTGATGAACGTGTTGATGATGT
>A01_916101
GATGATGTGTGTGTTTAGGGTTGCTCTTCA[A/G]TTCGTGCACGAGCTTCAAGTCAAGGCTTTG
>A01_916371
AGCACGGGATAGGCTTGTGAAGCTGTTGGA[T/C]TCTGTTAGTGATGAGACTGGAAAAGAAGAT
>A01_916518
GTTTATTTTATAGGTTGCCTCTGAGAATGG[C/A]TACAACAGATTAGTGGTGGGATCTTGCACG
>A01_917399
ACTACAGAAGCATTCTGTCCTATCTGCAAT[G/A]GCCCGCTAAATGGATCAGACTCATCGGAAG
>A01_917907
TTCTTCTTGTTTAATAGAGTTTGTATCAAT[C/A]GGAGTAACAAAAGAAAAACCATATAACTAA
>A01_918165
TGCTGGCACGTTGCAATCGCAGAAAACGCG[G/A]TTGAGCCACCGTAGCTAGAGACTACTGCGG
>A01_918794
ATACGCTCTCTCTCTTCTATGTTTGTATTA[C/A]TATTTTGTAATAATAATAAAAACGAATCCC
>A01_919105
TAGTTCTTTTTTTTGGGTTATGCATCGTGA[T/A]TTTTTTTTTGTTTTTTGCTTAACGGCTTGC
>A01_919426
TGTTACTACTTACTACAAGGTAACTCGTTA[A/G]GAGTCCAGACTCTGATCACTATCATCAGTA
>A01_919940
ACTTAGATTTCTTTTTCTGTTTTGTTTTAC[T/A]CATAAAGCAAATTCCAGAGAGGTGAAAAAG
>A01_920131
CTCAGCTTCTTTTAACGTAATTGATTTATA[A/T]GGAATAATGAAGAAGTATTAAAAATAAAGA
>A01_920499
GGTGTACGGTATCGCTGCGCCATGGCCCAT[C/T]ACTATGTCGAAAGAGTTCACAACCATCTGC
>A01_920928
ATAAGACAAACTAATAAGTCAACTAAAAAT[A/T]GAATAATTCAACTATAGGTAAATTATTAAG
>A01_921032
CGTACATGGAGAAGGAAACGCCAGTTTAAT[G/T]AATCGAAATGATTTTTCTTGATGAATCGAC
>A01_921069
AATGATTTTTCTTGATGAATCGACTCCACC[A/G]AACGCTAAGCATATCAAAATATTCCTCAAA
>A01_921246
CTAATAGATTAATGGAGACAAAACAAATAT[C/T]GATCAATCCAGATCGTATCATGTTTCTTGT
>A01_921903
TATCGGTTTGGGTGTTGTGATGATGATCGG[A/G]GGAAGACTGCCACGTCAGCTGTTGGTGAGG
>A01_922201
ACCACCGCTGCTTCTCTGGAAATTAAACAT[T/C]TCTGATAACATTCCGGCAGGTTCGTAGACA
>A01_922404
GATGGTAATCTTGGGACATAGAAATATTGC[A/G]AAGAGACTTCAAGAGAACTGTAGTAGGCTT
>A01_922579
ACTAAGAAAGAGTGAGATGGTCAAATAGGT[A/C]GTATGCTGTTTTAACAAAAAAATCTATATA
>A01_922636
TATACACATATCATCTGATGAACAAAATAA[C/A]ACATACAAAGATATATATACATGTATGTAT
>A01_923395
ATAAGAGCCACCACCATAAATATTAAATAA[T/A]ATATAGACAGATATATTTAAGATACAGCCA
>A01_924451
CATTTAAATGTAATAGAGTAAGCTTATACA[G/A]CCATATCAAATTAACTTTTCCTACAACCGA
>A01_924704
CAAAAACTATCACGACCAAAATTATAGTAA[C/T]CATGCAAGAAAATGCTAAAGTTACCATTTA
>A01_924749
CTAAAGTTACCATTTACCACTTCTATGTAT[T/C]CAACTTTTTTTACCATCGATCTTGAAAGCA
>A01_925181
GATTTAAACGACCGAAAACAATATGAAAAT[T/C]TGAAGTGAGCACTAATGAGGGATTCCTGAG
>A01_925830
AAAGATACGTACGTAAAATTTGCATAAGAT[A/T]TGTTCATGATTTTATTTCTAGTTTTACTAA
>A01_926014
ATGGTTCGCTTAAAAAATAAAATTGATCGG[G/T]TGAATCTCTCACATGAATCCCACCCTCCGT
>A01_926144
TTACGCATTTATACTCTTTACCCACCGAAG[C/A]CAACTTGTAATGGCTCCTATTGCTCTGTTT
>A01_926463
ACTTTAAAGTATTTTGTTACATATTCATAT[G/A]TCTAATGCAATAGATTTCATATCGTACATA
>A01_926551
GCCTTTTCTCCAAAAAAAAAAAAAAAAAAT[C/T]GGGGTTTCATGGGTACAAAAATTGGTTCCA
>A01_926650
TGTTATAACTGGTTCTCAAATAAAATGTAT[T/C]AGCTTAACTAGTAAATAATAATCCGGCTTT
>A01_926763
TGATATGATTAGATGGTGTGCTTCCAAATA[A/G]TTAGAAATAAAGCCATGATCACTTCTTTGT
>A01_926808
ATGATCACTTCTTTGTCTAAAGGACAAATA[T/G]AAATAAGTTTCTTAGCTAAAAGCTTTTACA
>A01_926883
AGGCTCATATAGCCTCATAGGTTTGAATTA[C/T]TGTCTTGTCAACATATCATTTGATTTCACA
>A01_927305
TAAAGTCTTGCAAAAATGCGAAAACACGAT[G/A]ATTTTGTTTGTTTTTCTTGTAAATTCGTCT
>A01_927383
GCAAAGGAGAATCGCTTTCAGGAAACTTAA[A/T]AATACGATGTTAAATTGTTAAAATAGATAA
>A01_927482
GGAGACAAATAAATTTGATTTTTATGATGG[G/T]AGTGTGAGACCACAGAGAGAGTAGTGAAAA
>A01_927633
TCTTTTATTTTATTCAATAGTCTTTATGAT[A/C]ATTTCTCGCTTTTATTATGTTTTTATCATT
>A01_928063
CATATCATTGAGTAGTGTGATCAGTAATTA[G/T]AATACATTTGGTATGTATACACTATAATTC
>A01_928313
AGTCTAGTTAAAGATTAATATAATCAACTA[A/G]AATGTAATTATATATATTGATCTCTGATTT
>A01_928372
TTAAACATACACAAAACTAAATTTTATATA[C/T]ACTAACCAAGATTTACTATTTTTGGTTCTT
>A01_928646
CAGAGAGTTAATTCATGTGCCAGGCATGAC[T/A]ATGACTAAGTAAACGCAGGGCCGGCTCAAC
>A01_929339
TAAGGCAAAAAAAATCATCAAATGAAGAGA[T/A]ACCAAAGAAGCAAAAATGATTTATGTGGGA
>A01_929667
TTTTTAATGTTCATGCATGCATGAGGCTGT[T/C]GGAAAAAAAAAGTCTCGAGGCTTTGTTCAC
>A01_929999
GCTAATCCATAACCTAAAAATTATTGTCTA[G/C]AACAGTGAAGCCTAATTATATATGGGCCTT
>A01_930264
GTGGGATCACAATGTAGAGAACGTCACTTA[G/A]TTCAACTACTACTAAAACAATCAGAATAAA
>A01_931056
TAATCTCCCAATGGCGATGGATCGTCTATC[A/C]TCTAATTGAAATCATCCAATTCATTTGGTC
>A01_931198
TTTCGTTGTTTTAATGTTTTGTCTGTGTTT[T/C]CGTGTAACCATGCTTATGTTAACATACTAA
>A01_931228
TCGTGTAACCATGCTTATGTTAACATACTA[A/G]AGGTTCAGATCAAATGCTAATATGATCAAA
>A01_931309
AAGTGTTGAAAAAAAAAAGCTACAGAAGAA[A/T]GTAACTAGAGAGTCAAAGATCATGTGTCAA
>A01_931374
GGTAATGCTAGTAAACATCAACTCTGTCTT[T/A]AAGTTTTTCAAAACATTTGATTTTTGTTTA
>A01_931797
TTCCCTTCATCTCTTTCAGGTAAACTTCTG[A/C]TTTATCTATGCTCTGTTCATGACTTGTACT
>A01_932082
GTTTAAGATTTGGTAACCCTTTTTGATTCT[G/A]ATGCAATCCTTTATTTATACCTTTCTTCAA
>A01_932428
ATTCCGCGGTAAATGAGAGTTATCTTTTAT[C/T]CTTCTTCTATGGTTCATTGTACACTCAACT
>A01_933238
GCCACGCTTGTGATAAGCCCATCATAGACT[G/A]TGAGGTGGTACCAAAGACAGTAGTACTCCT
>A01_935195
TATTGGCCCACAAGCAAAAAATATTTTTGG[C/A]CTTTTGTTTCTAAAAAATAGTGATAATATT
>A01_940559
ATTTCAGTGACCATTTGATTTTTAAGTATC[A/G]ATTCGAGGGTGTATGTATGTCTACGAATCA
>A01_940878
ATGCAGTATCTCAAGACCAAACAGAGTTCA[A/G]CAAGATCAGTGAAAAGAAATATAACGAAAT
>A01_941799
CATTAAAAATAGAGAACCACTTCTAAATAC[C/G]AAAATCAATGATCATTACCTGATCAGGTCT
>A01_943271
TGTTAGACGAATGTGCATATGGATAAGAAT[G/A]AGAAGACGTGAAAATATCAAAGTTAGATAA
>A01_944514
TGATCTCTTAATATTAAATCTATAACATAG[C/T]AATCATACCAATATTTCTACAATTCGATCT
>A01_944709
TCTATTCAACTTCTCAGCGAACTCTCTCGA[T/C]TTCTCCAACCCCATGAGCTTCGGATACGTC
>A01_945039
CGCCACTTGTCCAGCGACCAGCCCTTCGGT[T/G]CCTATAGCTTTCGCCAACTCTCCGACGGCT
>A01_945105
CACCCTCGCCGGAGAAACGTCGGAGCTCGT[G/C]GCCGACGCTAAATGCTCGAAGGCGAAGGAG
>A01_945938
ATTTTTGTTCCGTTATTTAATTTATTTTGT[A/T]GGACAAAAAAATCATTGTCTGGTTAGTGTA
>A01_946010
AATCAGCATAATATTTTCTTATTTGGTAAG[A/G]AAAAAAAATTAGCATAATAATAATCTTATA
>A01_946059
AATAATCTTATAAGTATATAATCTTTCAAA[A/T]TAATAAAACACCTTAATTTAGAAAGACGTT
>A01_946746
AGATTAACTTTTGTCTTTATTTCCTTTTTT[G/T]AGTTTTTAGTTTTTTTTTTGGGATCTTCAA
>A01_946806
AGTCTTCGAATCCACAGTCGTTTTTGTTCT[A/T]AGTTCGCCTATGAGTTAGTTTCAGCTGTGA
>A01_947012
AGGAGCTTCTGTCAAGAAACAATCTGCTGG[C/T]GAACTTCGTCTTCACAAAGGTATCAATATA
>A01_947208
CGGCAAAGATGATTTGATGAACTTTGAAGT[C/A]TCCATTAAACCTGATGATGGTTACTACCAG
>A01_947564
GCGTGAAGACTGGAAACCTGTTCTTAACAT[C/T]AACACTGTTATCTATGGACTCTTCCATCTC
>A01_947623
TCTTCACGGTAAAACAAAAACTAGCCTGAT[C/A]GATAGATACAAGCTTTTAGTGATTCTCTTA
>A01_947735
GAACCATGACGCTGCACAAGTCTTGAGGGA[T/C]AACCCAAAGCTCTTTGAGACCAATGTCAGG
>A01_947828
CTTTTTCCCACGCTGTATCTAACAAAAAGC[T/C]TTGGTTCGTTCTTCTTCAAGCAACAAGATA
>A01_948395
GTTAACAGCTGAACCGCACCAGCTTATGGT[T/G]AGACCCATCAAGAAGAGAGTGATGGAGAAG
>A01_948425
TAGACCCATCAAGAAGAGAGTGATGGAGAA[G/A]GTCAAGTAGCTTTCTCTGCTCTGTGGGATT
>A01_948593
GCCTCCCATCAACGTTCCTATAGCGCATCC[G/A]GTCGCAAACACCCCAAGCAAAGCTGCTGTC
>A01_948837
CTTTGTAGCTGCCCATGAGTCATTCCAAAC[A/C]GATATCTTTTGAACCATTAGTTCCTCTCTA
>A01_949672
TCCTGCTAACGGCGACGCGAGTCCTTGAAC[G/A]AAGTTCCTAACGAATGTTAAGTATCCTAAA
>A01_949983
ACAAGAACAGTAAAGTATAAATCGAAGAAG[A/T]CAAAAAAGGAGCTAACTTTATCTTCATGTT
>A01_950038
CATGTTGTTAGTACGGAGGTTGCGAGGAAA[C/A]AGAGACCGGAAGAATCCTAAAGCGGTGGAG
>A01_950070
GAGACCGGAAGAATCCTAAAGCGGTGGAGA[T/G]GTAACCGGAACGAGTTCGAGCACGACCCAT
>A01_950397
CACTAATAAAAAAGATTATCAGTTTTATTT[A/G]GCACGTAATGGTAGTTGAGTGGGTGGATCG
>A01_951023
GCATTCGAGTGCCAAACAATAAAACGTTCT[G/A]AAATATGAAAGTCCAAATATGAGATCACAT
>A01_951296
GGAATTCAATTTTGTTTTGTAAAGTTAGAA[C/T]AAGAAACCGAAATATTTTACCAGCGTACAA
>A01_951753
CGGTGAGTATATATAATTTTTTAATACCAG[A/G]AAAATAGTAGAATTGTTTGATTAATAATTA
>A01_951842
GCTGGGGATTCTGCTTCCTGTCTTTGCTCA[G/C]GCCTCACTGGAGCCGCACGTGCTCCGACCA
>A01_953025
GAAAATATTAGTAATTTTATTTCTTAATCA[G/A]TTGAATTATTAGAGAGATTCTGAGATAAAA
>A01_956424
GCAAGAGGAGATTCTTGCACATGAAGCAAC[G/T]GGAGGGTTTGTGAGTCACTGTGGATGGAAC
>A01_956849
CATTAACTGAGAATCTTGTAGACATGTGTT[C/A]AAAAAACATGGCCTTTTATTTTTTGAATGT
>A01_957055
CCACATTAATGCTAAAATATCTTGTTTTTC[A/T]GTTTTCATCAATATTTTTTTAAAAACTTTT
>A01_957676
TTTATGCGTGTTATGCCTTTGAGCTGGTAA[C/A]ACGCATAGCTCATGTTAGATTCATGATTTT
>A01_958222
AGGTAACTATCACTCAGTTTTCAGTTCTGC[C/T]TTTTGCTTTTCATATATCAGTTTAGAATTC
>A01_958336
TAAAATTTGAATTCAAGACTTTCTAGTCTT[C/T]AAAGCCAAAGCAGATATCCACACGTCTTTT
>A01_958437
CTTGTTGAATGTGTTTTGAGAAATTACTAG[A/T]CTACTAGTAAAGTTTTGTTGTAGTAAATTG
>A01_958468
CTACTAGTAAAGTTTTGTTGTAGTAAATTG[T/C]TCTAAGAATCAGCATATGGTTTAAGAATGT
>A01_958540
ACATTTAAGAATGTGTTTTGAAATATTATT[T/A]GTAAACTTCTTGTTGTTGTAAACGAGACTG
>A01_959057
TTTCTAATAACAAAGCAATAAACGTAATGT[C/T]AGCCAAGACATGTGTTCAAGAAACATGAGC
>A01_959223
ACAAGTACACTTACAGGTTCAGTAGCTTTC[T/A]TGAGCCATTCCATTTCGGTTTGGTTCATGA
>A01_959255
GAGCCATTCCATTTCGGTTTGGTTCATGAA[C/A]GGAGCCAAAATGTCCTTGCATTTCAAATGG
>A01_959707
GAACGTTCCTAGCATGAGGTCTGAAACTAA[C/T]TTGGTGAGGTCCTGCATAATCATCCCAACA
>A01_960035
GACTATACCGCTTGTTCCTTTAGGAAACCG[A/G]GCATTTCCGAGTGCAACATGACCCTTGAAC
>A01_960556
AAAAAAAAACATTACCTCTTTGGCAGCTCG[A/T]AGACTTTCAAGCTTATCGCTCACAGTCAAT
>A01_961952
AACATCGGTTCCACGGATGTTGTATAGCCA[A/C]GCAACCTCGTCGAGAGCAGCGATGACGTAA
>A01_962140
CCTCGTCGACAAGATCAGTTGTTGTCGGAA[T/C]GAGTTTCTGATTCTTCTTGGCAAAGGACTT
>A01_962273
CTACATTTGTCCAAAACCCAAAAAAAAAAA[A/T]TCAATGAACACAAAAAAAAATTAAAGAAAC
>A01_962315
AAAAAAAAATTAAAGAAACATCTTATTGAG[C/T]GTGTGATGAGTTGCTTACATCAGACATCCA
>A01_962354
AGTTGCTTACATCAGACATCCAAACTTCAA[G/C]GAGAGGATCTTCTCCCATACGCATTAGTGT
>A01_962433
TTGGGTTGCTTGCAAGAAGTAGCGTCCATC[A/T]GTCCAAAGCCTTGCTTCGTTTTTCGTGATT
>A01_964615
ACAAAAATTAGCACCATAGTCATTTTAATT[T/A]TTAGATTTATCAAAATTTGAACCCAAGACA
>A01_964654
ATCAAAATTTGAACCCAAGACACAATACCC[A/G]TTGTATTTGTAATTATTTTTTAATGGAAAG
>A01_964786
TATATATAAACAACAACCATGATAATCATT[T/C]ATTAAAAAAAATTGTATAAGAAAATTATTT
>A01_965169
TTTTCATAAAACATTTTGAGTGTTGACCCA[C/T]CCAAAAAGAAGAAGAAAAAAAAAACATTTT
>A01_965465
CAAGTTTCTCAACCGCATGCGTATGAAATG[T/C]CCCCAACACTTCTACGTATCATCCTCCAAA
>A01_965659
CTGAAGGAAAATATTTTATAAACAAAAGAT[T/C]GGTCTAGAAGTGATTTTCCCCAAAAGAAAG
>A01_965699
GTGATTTTCCCCAAAAGAAAGTTTTACTTT[T/A]AAAAAAAGGTGTTGGCATAAACACAACCAA
>A01_966144
GTATACTTTTGTATAACTAAATAAACTTAA[A/G]AAAATTGCTGACGACGGAGTTGAAATAAAT
>A01_966206
CTTTACTTTTAGACATTGCATATAGTAATT[G/A]GTTTCTTAAATTTGTATCAATGACTAACAT
>A01_966266
TGGTCTTAAAAGTTAAAACAAAGATAACAT[C/G]TGAAGAGGACCATATTTTGATAACATGGTG
>A01_966690
ACGCAAACTATTTTGAGTTACAAGCAAAAA[A/G]CCAAACGGTTCTTTGCGGATAAGTTTTTGC
>A01_967546
AGTGTTGGGTTATTTGGGATTTTACTGAAA[A/G]TGTTATTTTTTCTATGGTCGTAGGTTATGG
>A01_967629
AAAAGTGTCTCAAAAAAAAATTATTTGAAA[T/A]ATGTTAAGTTTATTCAGATTAAAAAGGTTT
>A01_967695
TTTATAAAAGATGTGACTATTCTTCTAGTT[G/A]TTTAGAATAATGTGAAACTTGATAGGCTGA
>A01_967774
CGATCTAATTTAATATATGGTCTTGATTCG[A/G]ACAAAGAAACTCTTATACTTTTGGAAGAAC
>A01_968022
ACAATAAAACCACTAAACATAATATTAAAT[T/C]GATCGGTTTAGCATACTAAACCTACTAATC
>A01_968215
CATCATGTGACAAAATATTTATCTTATAAA[A/T]TATGTTTTAAATTTTACTGGTGTCATATAT
>A01_968565
TGAGCCAATCAAATTCCAAAAATATTTGAT[T/C]ACTAGTTAGCTAGAAATGTCAACATTTTAA
>A01_968856
TTAACAATACTGAAAATTTGTATTGGGGAG[T/G]TAACTAGGGGAGAGAGATGTTAGGGTGGGA
>A01_969186
ACATCCTCTCAGAATGAACAAACTTTAGAA[A/G]AAGATAACAATAAAAAACGTGACACATTAA
>A01_969969
ATTTTTCATTTTTGTAGAGTAATATATTTT[A/C]TTGGACGTTTATAATGTCTAAGTTTAGATT
>A01_971431
TATTAGTTAATTTCTAATTATAAAATAATG[T/C]TAAAAGAGTTATTCATTTAGAAGTATTTTT
>A01_971929
GATAGAGAGAAAGAGAGAGATCCAAGAACA[T/G]GAACCACACTCTGGATGATCAGAACATGGC
>A01_973487
CTCGTCAAGTTGCAGTTTGGTTTCAGAACC[A/G]TCGTGCACGGTGGAAGAACAAAAGGCTCGA
>A01_973855
CAGAAATTTTAAACAAAAAGTTTCAAAAAA[T/A]TTTTGTTTGTTTATTTACCTTGTTCTTTGC
>A01_974003
TTTAACTGGCATAAATGAACGTGAGCTCAA[G/A]GCTCGAAGAACTTTGCATATAAAAGAATAA
>A01_974484
CGACGGTGATGACTACAATAACCTGTTTTA[C/T]CCGGTGCCTGAAAACATCTACATTGATGGA
>A01_974670
TATTTCTAATGTACAAATAGTTATAATGAC[G/A]ATGGATGTCTCGCTAGTGTATTTATGCAAT
>A01_975167
TCTTCAAATATATTTTTTTTTACTAGCCAA[C/A]AAGAAAAAAGTACGGCTGTAAAAGGAGGGT
>A01_975213
CTGTAAAAGGAGGGTCGGCTACAATATGCT[A/G]TGCAAGATTTTTTTCTAATATATAAATACA
>A01_975559
TCGTATCAAAATAGTAAACATGAAATGATT[A/G]CAATTATCATCTGGTTACATGCATTAGTAT
>A01_975640
GACCTGAGGCTCTCAAAAAAAGTTTGTGGA[T/C]TCAAACCATCATTTAGTTTGATGGTCTCAA
>A01_975708
TGGTAAATGTGTTTTTGTTTGAGGATCTAT[A/G]ATGGTAATAATAAATGCAAAATTTGCATAG
>A01_976006
GTAGAAAGTGAAGTGTAAAGCAAACGTAGT[G/A]TAATGGCTCTTTCCTAAAACGATTTGTTTT
>A01_976168
CAGTCACATCAATTACCTAATGGCTAAAAT[A/G]GTAATGCACTAATGCTAATGCCCCACGAAA
>A01_976847
ACAAAAAGGAAAAATATATTAAAGTATTAT[G/T]TCACAAAATATTACAGGATTGATCTTATAA
>A01_977085
TTATCCAGTAACACGTGTACAGCTGGACAT[A/C]TCCTTGTCGCACGTGTCAGATCATCAAACC
>A01_978860
TTTGTTGTAATGTAGGAGCAAGGTTCAGTT[G/A]GGAAGCCTAGCTTTGGACAAATGCTAGCGG
>A01_979141
CTCATCTTTTGCTGGTCTGGTTATAAACTC[C/A]TGTGTGTTTTACTCAAACAGGATGAAAGAG
>A01_979271
TAATGTTATTATTAGTATATGGTTTCTTCT[A/T]ATGTTAAGTTACTCAACTGTTAATTCACCA
>A01_979798
TTAGTCTTCATGATCGGATTCAGATTCTTC[T/C]AAGTCTCGTATTGTTGCTGTTGATGGTTCT
>A01_979855
TTCTGGTTCAGGGCTAATGTTTGGTGTTTC[T/C]TCTTGTCGTTCGCTTGGTGGTGCAGCTTCA
>A01_980486
GGCTGAAAGAACCATAAGCTGCAAGGAGAG[A/G]GGAAAAAAAATCAAATGCCTGTGAACAGAT
>A01_980967
GTAATCCAACCTGAAAATTTCCATACAGAA[G/A]ACAAATATTTCTCTCAAGATGCGATGATCA
>A01_981221
TCACTCCAAGAATGATCAAATCACAGTTAC[A/G]CTTGTTTATGAATAGTTTAAACACTCTAAC
>A01_982174
CGATTTCTCGGCGATCTCCCTCATGAGCGA[G/C]GCGTACTGTCCGCCGAACCCGACGTCGAAG
>A01_982434
CGAGAGCTTCTTTAAAGTAAAACGCGGCTC[T/G]TTGTAACGGCCTTCCCGCGGGAGATCGAAG
>A01_982492
AAGGCGTTGGTTGAGGCGTGAGAGAATCAC[T/C]TGAGCGAGCTGTAGCTCGTCTGACTCGACG
>A01_982864
CTGATTATTGTTGTTATTATTATCGGTACT[G/A]TTAGTGTTCGATGGTTGGTTGTCTTGAGGA
>A01_984788
TACTAAAGTTCCTTTGCGGCAGCTCTCTCT[C/G]TCTCTCTCTTTAGTTTTTAATGTTAAATTC
>A01_985022
ATGAAATACAATGAGACTGTCGAGTTCTAA[T/G]TGCAGAACAGAAATTTAATGATTCTAACAC
>A01_985550
CTATATGTACAACTATTTATCTAAAACCGG[T/C]AGTATACGTTATAACGAACACGGAACACTT
>A01_986685
GATTAGTTTTTTTTGTTGTTTATGTTTTTT[T/C]CCTGTTTTGCAGTAGAACATGTACTATGTT
>A01_986998
ACTTTACACGTTTTATTATTAGTTAATACT[A/G]TCTTTGTAACACTTTTTGTGAAATGTTATC
>A01_987139
TATGATATCTAGTGATTTGTTCGGGTTTGC[G/A]ATCATATATCTTCTGGAATTTTGTTATCTC
>A01_987190
TTGTTATCTCCGCGCGAATCTGCTAAAGAT[G/T]ATAAATGTTTTCAGAAACAAAGCATTATAT
>A01_987327
ACACCCAACTGTGAATATGGTGAGTATAAT[C/T]CACACCTAGACAAATTTCTTAATCAAAGTG
>A01_987421
TTAAATTATTTGTATAATGTTGTGCTCTTT[A/G]TCTACTAAAATTCAAAATTCACTATGTTAA
>A01_987966
ATTTTTTCTAAGAACTCATTTTTCTTTCTT[C/T]TTATATATTTTTAAGCAAGCAATTAATGGA
>A01_988296
GATCTCTAAATTTGTATTAAAACATTCGGG[T/C]TCTCAAATTATTGAAACTAGGTGATTCGTC
>A01_988371
TAAATATTTTATAATTACTTATTAATACAT[C/A]TATTGCTAATTAAAATACTAGAATGATAAA
>A01_988477
ATGTTATTTTTTTCAATTATTAATGATTTT[G/A]CTTGGTTAGTATTTAGTTATGTATTTTATA
>A01_988507
GCTTGGTTAGTATTTAGTTATGTATTTTAT[A/G]TATTTTATTTTTTAACTTTTATTACAAGAT
>A01_988637
TAATTCGTACTATTATTATTCAATCATCTA[A/G]TCAAAAGAATTTAAATTCATTTTTATTTTT
>A01_988755
TTTTAACGTGAGAGTTTAAATGTGAAAAAT[C/T]ACTTCGCAAATAATAGTATAGATCTTTTTA
>A01_988785
CACTTCGCAAATAATAGTATAGATCTTTTT[A/T]AAACTGTCTATAACAACTAAAATCTCATGA
>A01_988916
TGCCAACTAAAGATCATGGAATTGTTCAAC[T/C]TCCGATCTTCCATACAGAATCCAGTCACAG
>A01_989036
CCCACTACTCACAATAAGCTTGAGAGCATG[T/C]TTACGTTCGGCCCAAACCCTATAAAAATAA
>A01_989275
TGTGCTCTTTACACTTTTTTAAAAATTGTA[G/T]TGTGTTTTCTTGAACTAATTCTTCAGCGTC
>A01_989418
TATTTTGTTTCTCTGTTTCTAACCATTTCT[C/G]CTTGTTTTCCTTGTGTTTCTTCAGGCGACT
>A01_989670
AGGTGATGCTGTTGTTAATGTTTACATAAA[G/C]CATGAGAAGAAGTTTGCTTTCGGGGAGATG
>A01_989758
ATATCTTTGAATGAGATTATATTTGAGGTA[C/T]GTTTTTTTAATATTTACCTTTCTACCAAGT
>A01_989839
TTTGAATTAGGTCTGCAGTTTGGTTTTTTT[T/A]TTGTTCGGATATTTTTTCAGTTAATTCGGT
>A01_989935
GTTTTCGTTTATTTTTAATTTTATAAAAAA[T/A]TTGGGATTTGGGTTAGAGTCTGTTATATTA
>A01_990417
CTACCAAGATGTCGCTGTTACAGACATCGC[G/T]TGCGCTGCCCTAAACGGGATCAAAATGGGA
>A01_990456
CCTAAACGGGATCAAAATGGGAGATAAGAC[G/A]CTTACCGTGAGACGTGCGAACCAAGGAACA
>A01_991269
GTGTTCTACCCTGAAGACAAGTTTGATCTG[G/A]GAGACTACGGAGCCTGAACTCATCCCTTGT
>A01_992327
AGGGTTAATATATTTTATTATCTTTATATA[A/C]TATTTGATAACTCACTACCACACGAGGTTA
>A01_992895
CTAAAATTTCAAACTTTGAAAAACTTATTA[A/G]AATGGACCTATGACGTTTTACACTCTCCAT
>A01_993590
TACACTAGTTAGTTAAAATTTGTATATTCT[T/C]ATATAGTTTTCTAAATACTTCTGGGTGAAA
>A01_993902
CTTATTGTTATATGTTTTTGTATTAATTTG[T/A]TGTATAGATACTGGTGTAATGAGTGGAGCG
>A01_994107
GCCTCAGTACTCTTCATGTTGGGCTCAATA[T/C]TAATGGGCTGGGGTCCGAGTTATCCTGTAC
>A01_994145
CTGGGGTCCGAGTTATCCTGTACTCCTCAC[T/C]GGTCGATGCACAGCCGGACTAGGAGTTGGT
>A01_994313
AGGCTATCTAGTGAATTACTTCTTCTCCAA[A/G]CTACCGTTGCATATAGGTTGGAGACTGATG
>A01_994409
GTTCGGGATCTTGAAAATGCCGGAATCTCC[G/A]CGGTGGTTGATCCTACAAGGCCGCCTCGGA
>A01_994502
CTCGCCTGAAGAGGCGCAAGTACGATTTCA[G/C]GACATTAAGATAGCTGCCGGAATCGACCCA
>A01_994753
AGCAGGAATCACGGCTAAAGACAAGCTGTT[C/T]TTGGTCACAATCGGTGTCGGTATCATGAAA
>A01_994846
CGACAAGGTAGGTCGGAGGAAGCTTTTGTT[G/A]ACCAGCGTTGGAGGAATGGTTTGCGCGCTG
>A01_994969
GGTGCTGAGCATAGTTTCGGCTTATAGTTT[T/C]GTAGCCGTTTTTTCTATTGGGCTTGGCCCA
>A01_995023
TGGCCCAATAACTTGGGTCTACAGCTCTGA[G/A]GTGTTCCCGTTGAAGCTTAGAGCGCAAGGA
>A01_995089
TCTCGGCGTTGCGGTGAACAGAGTAATGAA[T/C]GCCACTGTGTCCATGTCGTTTCTATCTTTG
>A01_995197
AGCTGCGGTGGCGTGGAATTTCTTCTTCTT[T/C]CTAATGCCGGAGACTAAAGGAAAGTCGCTT
>A01_998649
CTGGTGTATAGCTCGTTGAGCACAAGCTCT[C/G]GGTGGTTTTGATTGTTTTCACGAAACAGCC
>A01_998704
ACAGCCTTCTTTGATCTCCTCCGGTAAATC[T/C]TCGAGATTCATCCTTGTTCTCGTTTCTGAA
>A01_998755
CGTTTCTGAAAATCGATCGGAGAATAAAAA[T/A]AAATAAACAGAGGTTTGTGCCTTGTTGAGG
>A01_999092
GATAACAGAATCTCCGGTGGGCTTGAGTTT[C/T]TGGTTCGGGCGGGGTTGGGCTCGCTGCGTG
>A01_999124
GGTTCGGGCGGGGTTGGGCTCGCTGCGTGA[C/T]CTTGATTTATCGAATAATCGGATTGGGCTT
>A01_999437
AATGGACGTAGTAGTGAAGTGGTTGTGGAG[G/A]TTGATGAAGAAGAGAGCGGAGCTGATGATG
>A01_999712
GGGTGATGAAGAAGAGAGCGGAGCTGATGA[C/T]GACGACGGAGATGAGAGGCCTGAAGTGATG
>A01_999967
CGGTGAAGGGGTTGTGGAGGGTGATGAAGA[G/A]GAGAGCGGGGCTGATGATGACGAAGGAGAT
>A01_1000483
GAGCTGGGAAGAAGAAGAAGAAGAAGAAGA[A/G]GAGGAGGAGGAGGTGAGATTTGTTTCCTTC
>A01_1000546
GTGTGTTTATTATGATGACTGTATTTTTGT[G/A]TGACTAACATATGAGTTTTGACAGGAGCAT
>A01_1000617
GCCGAGCTCAGTCTATGGCAGAAGCAGTCC[A/C]AGTAGACGAGGAAGATTCAGACGATGAAGT
>A01_1000732
TGACGATGGAGATTCTGTTTCCAACAGTGA[T/G]GATGATAATGCAAGCGATGATGTTTCAAGT
>A01_1003295
CTTATGATTCATTCAACTTCTTCGTCATCG[C/G]TTTCGCCAGATTCTCTGTGGTACGTCGATG
>A01_1007943
GCGGCTGAGATCTCCGTAGATCGGTTTATT[A/G]TGCATATGGTAGCTGGATCTGATAATTGAT
>A01_1007978
TATGGTAGCTGGATCTGATAATTGATTCGT[T/G]TAATTCGATTGAATCCCTTTGTAATATTGT
>A01_1012464
CAGAACTCAACATCAGCAGAAGGTAATATC[A/T]GGCATTTGGTTTATCTTCTTGAAAATGCAA
>A01_1012613
GACACGGGACATTGTCTACATTCTCCAGAA[T/C]CATTACCCTGAGAGACTCGGTATGGCCTTT
>A01_1012779
ACCTACTCTTCTCCATGTAGGCTATTAAGT[T/A]CTTCTTGGACCCACGCACAGCTCAAAAGGT
>A01_1013337
GTTCTCAACATTCTGGACAGTCCTGAAAGC[C/T]TTTTTGCTAGAGCTGATGGATAAGCCAATA
>A01_1013507
TCTTGCTTTTTCTTTTGATTCTATCACTTT[C/T]AACTGGATCTCCCGTGAGAGAAATACAGTT
>A01_1013741
ATTTCTAATTTCAAATATTATTTTAAAATC[G/A]CAAATAAAATTTGTTAAGCTTTAGACTGAA
>A01_1013938
TTTATTTTAAATGATTATTAGTAAGTGAAA[T/A]GACATATATGGTCGAGTAATCTAAAGGGAC
>A01_1013993
AGGGACAATCGGTAAAACGACACAACACAG[G/A]CATTATATTCAAAGAAAAAAGACATTCCAG
>A01_1014185
ATATCATACCTTGTATTTGGTTATTAATTA[A/C]TTTTTGCTTGTATGCACAACCTTGGCACAT
>A01_1014238
TGGCACATGATTTTATATATAGGAAGCAAC[G/T]TGCTTTACTAAATCACTTACTTATAAAATA
>A01_1014868
AATATGTTATGTTGAACCAAAATCGACATA[A/C]CATTAGAAATTGGTTTCGCGAAGTACCCGA
>A01_1015056
TCAAAATCTTACTTGAGAATCTGATTTTGT[T/G]TATCGGTAATGAGTCTACTTACCCTTTTGA
>A01_1015120
AATCTGTTTTCCACTTAGATCAAACTCAGC[T/C]GTTTTGCGTTTTGTAGAGCTATATATTCTC
>A01_1015533
GGCTAGTTTTATTCGTTAGCTCCTTAAAAG[T/C]ACCGACCTTGGCGATTAAGATTTCTCATGC
>A01_1015568
ACCTTGGCGATTAAGATTTCTCATGCATTT[C/G]CCACAATCGTGACAACGTTAATGTTTAAAT
>A01_1015794
AAAGACCAGCTGATTCATATTCTGAATTTC[A/C]CTTTTGTTTTGAAATTCATGACATTTCATC
>A01_1015907
ATTTTTGAATGTGGAATTTAAAAGACCTTT[T/G]CTGAACGACATAAATTAGAATGAACATGTC
>A01_1015946
CATAAATTAGAATGAACATGTCCCTTCGGG[G/A]ACATCCGATAAAAATTAAAATTAGAATGAA
>A01_1016249
CTTTTTTCTACATTCTCTATCTCTCTCCCT[C/T]CACTTTGTCTGCAGATTGAACTTGTCATTA
>A01_1016325
TAATTGTTAACAATCTCTTTTTATTAATTA[A/T]TTATAATACTGTAGTTTGCTTAGGAGTGTG
>A01_1017027
ACCAAATTTTGGTCTTTTTGTCGAGTACTT[A/G]CGTACCAAAGTTCTATAAATACTCACTCCT
>A01_1017269
GTCAATGTTCTTCTCCTCTGAAAATGATGT[C/A]ATCCATCATCACTCCTCGCCTTATGCTTCT
>A01_1017799
TACCGACTATTAGTCCATTTTGTAGCTTAT[T/G]AAAATATATCGATTATTATAACTTTATCAT
>A01_1017904
CAAGAAGGAAGAAAGACGTGCGTCGGCAGC[C/A]GGAAACTCTACTTCCGGTGGAGGACTAACG
>A01_1017945
CTTCCGGTGGAGGACTAACGGCTTTTGGTG[T/G]TCCGGCATCGGATCATCACGGAGGTGCAGA
>A01_1018126
ATATTCTTTCGTTGATGACGTCAGAGAGAG[C/T]CATGATATCACGACCGATCCCTTCTTGTCT
>A01_1018450
CGGGTAATCAACTAATGATACGTATACTCA[G/A]GTACTTTTTAACCTTTTTCTCATGTGTGCC
>A01_1019961
ACCAAAAAAAAACAATTACCCTAAAATGGC[C/T]ATGGCCTTTGACCAATACTTAAATTTCTTA
>A01_1020929
CTGGGAAACCAGCTAAACCGGATAAACCAA[C/T]CAAACCGGTGGTCTTGTTAATCCACGGCTT
>A01_1023181
GTTGGTATTTCCAGACAATTAGGTGAGAAC[A/G]CAACAATAGAAAGCATAAAGAAGGCAGGTC
>A01_1024371
AAACCGGCCGTGTTACTCATTCATGGTTTT[G/T]CCGGCGATGGAGTGATGACTTGGGCGTTAC
>A01_1024643
CATGGTTAAGGCTTTAGTGGTGTCGGGTTC[G/T]CCTCCGGTTATGACTGACTCGAATGTAAAC
>A01_1024688
TGACTCGAATGTAAACCGGTTTGGGTTTAG[C/T]TCAATCTCGGATGTCTTGTTACCCAAAACG
>A01_1025159
TAAAAAAATTTAAGAAACAAGCAAAGCATA[T/C]GAGTCATCCCTATGACTAGTTGCAGCAAAA
>A01_1025204
ACTAGTTGCAGCAAAAAAAATCTGCTCTAT[A/G]TAAGCTAATTTATCACAATCATATGAAAAT
>A01_1025261
AAATAATTTACACACATTTCTTAATTTATA[T/C]TGCTTGTAGAAAATACATCTTTTATGGGGT
>A01_1025478
TCATATTTTCATACTGTAGAAAATTGGGAG[A/C]GATGACAAGCATGGAAATTATAAAGAATGG
>A01_1026041
GAGGTTGAGTAGCTTGAAACGTTCTTCTTC[G/A]CCTGGAAGTGGGAACTCAATGACTTCATCT
>A01_1026125
GAGATCTCCAGGTCTGTTGGTAGCCAAGAC[A/G]AGAACAATGTCTCGGGACTGATCACCGGTT
>A01_1026985
GAACAAAAATACCCAAAAACGGAACCGGAC[C/T]GAAATCCTTTAAATATCCGAATGGTTCCTA
>A01_1027038
GGTTCCTATATTGCTATATCCGAAATAACC[A/G]ACATAATCCAAAATATCCGAGATTTTATTC
>A01_1027142
TTTTAACCGAATTACCCGAAATAACAAAAC[A/C]AATGAGAACCAATTTTTTCTAGATATTTTT
>A01_1027444
TCAGCTTATTCCGATCCGTTAACAGAGTCC[T/G]GAACCCTCCTTCGATGTGACCAAACATTGT
>A01_1027487
GATGTGACCAAACATTGTGTTGATCGCAGC[T/A]AGCCACTTCTCCCTCTCACCGTTTATCCTC
>A01_1027522
ACTTCTCCCTCTCACCGTTTATCCTCTCCA[T/C]AAGCAACCTTCTGTTCTGATCCTCTGTAAG
>A01_1027730
GGAAGACTCCTCTTGCATCCTCACCAACTC[A/G]ACGTTGTGATGTCTCTGAGCTTCGTGATCT
>A01_1028305
CCATCTAGCCATTGGGTTACCAACAAACGC[C/G]AAGGAAGAGATTTGAGAAGAACCCTTTTTC
>A01_1031116
TAAATACATTTGATATATCTTTGTTTAGAT[C/G]CTCTCTGTTTGTTTCTGGTTTTCGAATCAT
>A01_1032149
AAGCTCCTTATATATAGGAAGAAAAAAGCA[C/T]GTTGTGGGGTTAATCCAGTTGGACGAATAT
>A01_1034960
AAGACCTCCATCTAACATTTCTTTGGTTCT[G/T]AGATGATTTTTGTATTTTTACTCCATCTTG
>A01_1036222
GCCATACCTAAACCAAAACCTACAAAATAA[C/T]CGAACTTAATTATCATACGAGCGAAAAAAC
>A01_1038529
GTTTATCAAACTTTCAGAATTGAGAAACTT[C/G]TTGTTTAGATGGGAATTAATATCACTCAGC
>A01_1040029
TTCTGAGTCAGGAACTGAAGTCACAGACTC[T/A]AGTCAAAGCGAGGTGGAGATAGAGCCTTTA
>A01_1040266
GTTGGCTTTGTTGTTGACTTTCCTCAGTGG[G/T]AACAGAAGGGCTATAGAGGCTTTGGAAGAA
>A01_1040511
AGAACCTCTCCTCAAGCAATGAGATTTGTC[T/C]GGAAATGGTAACTCTAGGTTTCGTCAAGAA
>A01_1040567
AAGAACCTCACATTATTCTTGCAACAAAGC[G/C]TCTTCAGCAAGCAATCAATCATCATTATGA
>A01_1040822
TCTCTCTTCTTGATATCAAACAATGGAACA[A/G]AGGAAGCCAAGGTGGGTGCATCAGAGTTGC
>A01_1040961
CTACAAATACTTCACAGGTTGTTGCTCCAG[T/A]TATGCATCATGATCAGCCTATAATAACCAC
>A01_1041106
AGTTAGGCTGTTTTTTTTTAACTTAGTCTT[G/A]GAAACGTTACAAATTTTTGTGTGGTTCTCT
>A01_1041151
TTTTGTGTGGTTCTCTCTATGTTGATTTAG[G/A]TTTCTATGTGTTGATACCAATCCAAAGAGC
>A01_1041272
TGCAATTTGTAAATCTTTTTGTGACAAAAA[T/G]GGTCAATTCTTTTAACTGTTTAAGTAAACT
>A01_1041315
TAACTGTTTAAGTAAACTTCAACATGTTTT[A/C]AACATGGGCAGAGATGGTTGATGTATGAGT
>A01_1041586
TTTGATAGGGAACGTATAGTATGCAATTTG[T/A]AAATCATTAAGTCACAAAAATGGTCAATTC
>A01_1041947
TTCTCTAATCTATAAATACAACACACCCAA[G/A]CACTAAACTCTTATCCTTCTTCTCAAACAA
>A01_1042249
TCCCTAAATCGTTTTATATAGATAAAAATA[T/C]ATTTTTAAAAAATCGTTTCTTTTTTTTTAC
>A01_1042575
CATAAGTTGAAACTAATCGATATCATGTTA[T/G]GTTTTTGATCCTTAGAAATATCATGCCTCT
>A01_1042878
TGTATCTAGATATCATGTCTCTTGTTCTGC[C/G]AGGCAATGACTCTGTTATCTTCATTCTTCT
>A01_1043086
AACCATTTTGGGCGACACCATTGCTTTTTT[T/A]TTTTAATCTAAGTCTTTGCTTCATATATAC
>A01_1043885
TGCTTCTGTCTTTCACTGGAGGTATAACAT[C/T]CCTGAGCTGGCTAAGAAGTACAAGGTGTAC
>A01_1044008
TTGGACTGATCAAGTTATTGACTTCATCAA[G/A]GAGGTTGTCAAAGAGCCAACCGTTGTGGTT
>A01_1044392
TTTGCAGGTGTACGTAAACGCTGCTAATGT[A/C]GATGACTACCTCGTTGAATCCATCTCAAAA
>A01_1045444
TCAAAATCGTGTTAACGGGATACTTCAACA[G/T]GAGAGATTTTTTTCTCTTGCTTTATTTAAC
>A01_1045526
TGTATGCATGAGTTTCAAAATCTAAACATA[T/A]AAAGGGAAATAAAATGAATAAAATCTCTTT
>A01_1045654
AAAAGTGGTCCTAATCAATATTCAGATTGC[T/C]AAATTGTAGGCTGTACTGTGGACAAAAGTG
>A01_1046298
CGATCATGAGATTCTGCAGGGATGAATAAG[T/C]GAATCTTGTAAGTAGGGCAAGCATGGTTAT
>A01_1046699
GTTTGTCTCTAAACATTAAAATAAAGAAAA[A/G]AAATTCAAAATCAAAAGAGAAGACAGAGAT
>A01_1046985
TGAGTCGGATTAAATCTAGACAGTGATTCA[T/C]AGATATACTAATAAAATTCACTTAATTGTA
>A01_1047070
TTCAAAAAGTTGTTCTGTGTTATTAACTAC[A/T]GGTTTAATGTTTTAGAATTCGTTTTTGTCG
>A01_1047476
TTAAATTCAAAGAAGAAAGGTATTATCGTC[A/G]AAATCAGTATTATAGCCCTGTTAGCTAATG
>A01_1047811
TCGCACTTAATTATTAGAGATGTGGTGTAA[T/C]GAAATTATAAATTTCGATTTGCAAGAGACT
>A01_1048598
TTCATATAATATATGTTTCTAACAGATTAT[G/A]AAATAATAAATATATATTGAATAATTAAAA
>A01_1051429
AATAGTTTTATTTGTATTAAAACTTTAATT[G/T]GTACTAAAATATATACTCAAACAATTATTT
>A01_1051654
CAATATATTTGGCTATGTCTAAATTTCTTT[T/G]ATTTATTTATTTCTTTTGCTAATTGCTGTT
>A01_1052093
TAACGGCGTTTACACCTCCTCCGTCAAAAC[A/G]TCAAACACCGTTACAACAACCACAACATAC
>A01_1052336
CTACCGCGAAGTCTTCGGAGGCTTCGACGG[T/C]CTCGATTCAGCTCCCTCGTACGATGAGCTC
>A01_1052633
AAGAGATTCGTTTGATTCGATTGAGTTCAA[C/A]ATCTCTTACCACAAAGCTAATCAGGTGAAC
>A01_1053095
GGTTAAAGCTGAGGCAAAACTTAAAAGTGC[A/T]AAAGAGGTGTTTGAGAGGAAGCAAACCTCC
>A01_1054082
AGAAAACCGTAGAATGAGAGAGGCTCGCGA[G/A]AAGGCAGCAGAAGAAGAAAGGAGAAGGAAA
>A01_1054369
AGATTAAAGAGTTGCAAGAGAGGAGAGCCA[C/A]AGAGGCTCTTGAGCAGGCAGAGAACGAGAG
>A01_1054475
GAAAGAAGCTATTGAGCTAGAAGAGAAAGA[G/A]AAAAGGCTGATAGAAGCTTTTGAGAGGGCG
>A01_1054823
GAAGGTGTTTGAAAAGAATCTTAAAGACGC[G/A]AGCCAAAAAGAAGGAACCAATGAGCTGGAT
>A01_1054887
GAATCTGAGAAGCTAAACGGAGAAGAATCA[C/G]GTGAGGAGACGTCCCCTTTTGTGACTGAAG
>A01_1055192
GAGAGCCTTAGCTGACGCACGCGAAAGACT[A/G]GAGAAAGCATGCGCCGAGGCCAGAGAAAGG
>A01_1055563
TGGTGAATCACCTCAAAGGTATACATCGAG[A/G]CTAGAAAGGCATCGAAGAACAGCTGATCGT
>A01_1056815
TAGCTTTTTATATGGGAAGAAGAAGAAGTC[G/A]CCGACCACGAGGAAGCCTGAGTTTTCTAGG
>A01_1057845
ATGCTAGTTCTTTATATGTGTAATATAAAC[C/T]GAGTCTCGTTGAAGTTGCTTGTTGAGGATG
>A01_1057891
TGCTTGTTGAGGATGAGGTCAACAATTGCG[A/G]TAGAGTAGATTTGAAAAGTCAAAGAAGCTC
>A01_1058213
GTTTATTTTACGGTTAAATTAAAAGAAATC[G/A]AAAGATGGAAATGCTAAGAAGCTTTAGCAC
>A01_1059386
CCTTGTCAACTTCTAACATCTCTAACTTCT[C/T]TAGTTCAAAAGACCCTTCTTCCTTCACTTC
>A01_1059438
CTTCACTTCATCTTCTATCTCAGCAGCACT[T/C]GGGGCGTAAAAGTGCATCTCGTAAGAATCA
>A01_1059718
AAGAAAGAGTTTCCTCTATCCACATGATCA[G/T]GACCTTCTCTTCCGAGCATTATGAGCACCA
>A01_1059804
TGATCTAAACCGAAGGAACATGGAGAAATC[T/C]TCCTTGAATTGACTGTAGTAAGCTTTGGAA
>A01_1060272
GGATCTCTCGGCGGTGAGAAAACTCCACGG[A/C]TTTGATGATGTCTCTAATGGTGGAGAGAGT
>A01_1060542
GAGTTTCTTGCATAACTAGTTTTCCCATCT[C/T]CTCCTGTCATGTGAAACTCTCTTTCTAGAT
>A01_1060658
TTTTTTCTTCTTCTTTTGGTGTTAGAATTT[G/T]CTTTTCTTAAAGGAGTAATCTCTGGCCTGT
>A01_1060901
TCATATTCGTATTATTAAATACTCATAGAT[G/A]CCATCTCACAATAAATTTTATTATGTGCAA
>A01_1061217
GAAATGTTTAGGTGAAGTCCAAAGTGGCCA[A/G]AAATAGGAAACTAAGAAAAAAATAATAACA
>A01_1061583
GACAGAATATATATGATTAAGGAGGAAGAA[G/C]ATAGATTGACTTTTAAAGGTAGAAATCTAC
>A01_1061659
GATGATGGGTGGTGTGTGTGACCATCATTT[T/C]CCTCTATCCCTTCCTTACCTTTAGGCTTTA
>A01_1061700
TTCCTTACCTTTAGGCTTTAGTACTCTATC[T/G]CTGTCTCTTCCTTATCTTTAGGCTTTTATT
>A01_1062064
TTTTTGATTAATTGGATAGCATTTCACAGA[A/T]TTTGAACTTAGTCCCTATACCAAGATTGGA
>A01_1062294
CTAATTAAAATGGGTTAATTAGTTTAATAT[G/A]GAGAAAAAGGAGATACTTATTTTAAAGAAG
>A01_1062520
TAAAGTGATAACCTTATATAGGAAATGACA[T/G]TTGTTAGCTTTATCGACAGTTCAAGCTGCA
>A01_1062580
AAAGACATGTAGGGGCGGCCTAACTATTTG[G/A]AACAAGCATTCTCGTTTACCATATTTTAAT
>A01_1062710
TTACCATGACCTAATCAACAATATACATAT[G/A]ATATGGTGATGTCTATAAAATTCCATGCAC
>A01_1063084
ACGTTTCAGATGTAAAAGCTAATATGTATT[A/G]AAGTATTGGGCCACTATATAGCCCGTTATA
>A01_1063146
GTTAATGGACACAGCTGGGCCCATGAATGT[T/A]TTTCTAACGTAACATGGTTACATACATACA
>A01_1063344
CCAATCTTTACATCTGCACTCCTCGTGTGT[C/T]AACACTCTCTTGTGAACAACGACAACAACT
>A01_1063763
AGATGTGTAGGGCCGGTTTAAAATGGTTTA[C/G]AATGCTTCTTGATGCTCCTTCAGCTAGAAT
>A01_1065463
TGAGATAGTGAAACTAAAAGAGAAGTATCG[T/G]TTTCGTGTTATATTGGATGAAAGCAACTCT
>A01_1065727
TGGGTTCTGCACCGGGAATGCCCGCATCAT[C/A]GATTACCAGAGACTTAGCAGTTCAGGATAT
>A01_1065773
AGCAGTTCAGGATATGTGTTCTCTGCTTCT[T/C]TGCCACCGTATCTCGCGAGTGCTGCCATCA
>A01_1066168
GTCCTTTCTTGATAAATGCCGGTTACCTGT[A/G]GGGATCAAACTATTCGTCTCAGCGGGACAT
>A01_1066305
TTTTCTTTTTTTTTGTTCATTACATCTTAT[G/T]TTTTTTTTACAACCTTTTGTCCTACTTTAT
>A01_1066466
TAAGTTGCTTGATATGACAAGTCATCTCTG[T/G]TTTCAAAAACTTGTATAACAAGAAAAACAA
>A01_1066514
ACAAGAAAAACAAACTGTGACCTAAAAAAG[G/A]TAAGAAGAATGAATGGTTTTGGTGGAAGAG
>A01_1066692
GCAGAGGTAATAGTCTTTTTTCTTTTTTTT[A/T]AAAACCTTTGTAATGAGATTCTCTTTTTGA
>A01_1066959
TCTTGAATGTTTGTTTGTTTTTATAGAAAC[C/T]GCGATGAAACCAAGGATGGGCTCTTTCAAG
>A01_1067064
GACAAGTAGCAAAGTGACGCCCGTGGAGAT[T/C]GAAGACGTGCATGACGCTGAGGAGTTGAAA
>A01_1067789
CACAACTTTGGATAGGTATGTCAACTACCA[T/C]GTTATGGAGTTTGAGAGGACTTTCAACGTT
>A01_1068077
CAACTATCCCGAGGTGAGATTTATATTTAT[G/T]TCTATGCTCGACTATTCTTTTTATCTATGA
>A01_1068335
ATTTGAATAACAGGTTCTTGGCAACAAGTA[C/T]CAAAGCAAGTTGCTTGAGATAATTGATGAA
>A01_1068669
GAATGGTGATCACAAATGCACAAAGAGATC[C/A]CAAGCTGAAAACGGTGCTGAGGAGACCATC
>A01_1069074
AGTTTTCCCTCTCAAAAAGTATGTTCATTC[T/C]TGTGCAACCACTTCTTTTTAAAAGTTAGGA
>A01_1069227
GTCACCCATTTTCACTGGCGTCATGGCTCT[T/A]GTGATGGGTGTTGTCACCATGATCAGAGTG
>A01_1069699
AAGAAGAAGAAGCTTGTAAGTTTTGTTTTT[G/T]GATTTATGTTCTGACTTGAGAAACAAGCTA
>A01_1069785
GTTTTGCTTCTTGTCTGTACAGTTCAACTA[T/C]TGGTGATCAATGAGGAAAATATGAAAGGGA
>A01_1070020
TATACTTTCTTACAAATACATGTATATTAA[T/A]TGTAGTTTTAGTGTGTATACTACTACTAGT
>A01_1073079
TTCGAACTGCTACGCTCTCGACAATTCAAG[C/T]CGTCTTGTCGATTTTGTATCCTCTTTTTAT
>A01_1073133
TTTTTATTAATTTGTTTTGTAGCTTTGGAT[C/T]AGTTAAAGAGTAAAGGTGTTTGCTTTGAGT
>A01_1075399
AAGCTACTCAAGAACTGAAGAGATCAACAA[T/C]GCTTTTGCCAATGAAGTCTCATGGGACCGC
>A01_1075725
AGTTTCCTTTCTTTGCTTTGGTTACAAAGA[T/A]CAAGAGCGTGTTCACAAGTCAATAAAGATT
>A01_1075820
CTCTTCCTACTCTCTTCTCTTTCTCACTAC[A/G]TAAAAGTCTTGGCCTCTGTCTCTTCGAACA
>A01_1075922
TAAAAATATTATTTCTTTTCGACTCTTTTT[T/G]TCAGATTAGTTAAATCTAGGTATTGTATTA
>A01_1076263
TAAGATTTTAAAAGTTATAAACAATGTAAG[C/T]CCTTAGTCAAAAAAAAAAGTTATAAACAAT
>A01_1076311
AGTTATAAACAATGTAATAAAAATTATTAT[C/T]ATTTTATTTTAACTATTGGAAGGCTTTAAA
>A01_1076372
ATTTTGAGCTAATGTTTTATTTGTCTATGT[T/C]AAGAATAATTCTGTCCATGCGATTATGATC
>A01_1076556
GTTAACATATGGATAAAGATCAATTTCAAT[A/G]TATTTAAAACTCAAAACTTTGCTTTGCCTT
>A01_1076697
ATGTTGGGTACCAAACACAAACTTTAGTCT[C/A]TTTTAATCTTCTTTTCTCCAATATTTTTTT
>A01_1076736
TTCTTTTCTCCAATATTTTTTTTACATTTT[A/G]TTTTTCTAGCAGTTCCCTTGATTATTATCT
>A01_1076810
GTTAGTTACCAACTCCACTTCTTACTTCTT[A/C]TTCAAAGTCTCTTCCTATAAATACCTTCTT
>A01_1078146
AAAGGATTGCAGGAAGATAAACTCTTGAAT[T/C]CATGATATGAGTAAAATGTTTTTGAGGGGA
>A01_1078206
AAGAAAATGTGTGACACTTGTTTACTTTGT[G/T]TGTTTTTTTTCTTATGTCATTTGAAGTTTC
>A01_1078316
GGAATATTTTAAAATATTTTCTAATTTTCA[G/A]TTAAAATATTAGAGAATTTTTACCATTATC
>A01_1078362
ATTTTTACCATTATCAATAGAAACTTGTCT[A/G]TGAAATCTTATCAACATATATTATTAGTAA
>A01_1078682
ATAGCGAACCATGCCATAAGTTGGTTCTCT[A/T]ATAAGAACGAAGAGATAATTCGATTAGAGA
>A01_1079371
TTGCACTTCTTGAATTCTTTAAGGAAGATG[G/A]ATTATCTTGGCTTTGTTATGTATGGATGCT
>A01_1079421
GTATGGATGCTGTTGAATTGTAGTGTCTAA[T/C]TAAAGTATTAGAATTGCAATGTTGCTTCTG
>A01_1079470
ATGTTGCTTCTGGATTGTAAGGAATCTTGA[G/A]GCGCAGCGATTAGAATAGCTTTGTAGTCTA
>A01_1079671
ATGTAAGATGCCATGGAAAGTCGATCAGTA[G/A]CCTTTTATGCAGAGGTTGAAAGATCACATT
>A01_1079762
TTGTTTCTTGGATCAACCATTCTCTCGGTG[C/G]TTTGTACTAATCGTTCTTGATGATCTCTGA
>A01_1079841
TTTAGGCTATTTCTTTCACTTAATAAATAA[T/A]CATGTTATTTCTTAACTTTTATAGTCTTGT
>A01_1080187
AGAAGAATACACAAACACACAACAAACCTT[A/C]ACGGCTGAGCTTGAGAGCATTGAGAGAATG
>A01_1080801
CTCTTTCTGCAGTCTATTGGTGGCGATTTT[G/T]GTCAGACCCTAACCAAAAAAAAGAGAGATG
>A01_1080847
AAAAAAAGAGAGATGATCAAGCCAAAAGGA[G/T]ATATAACACAACAGGTTTCTTTTTGGATAC
>A01_1080946
ATGCAGATGAAGTTGTCATTTGTAGTTTAA[G/A]AAGTTATTACAGTGATTATGAGTGTAAGAA
>A01_1081084
GTGTTCAAAGTAATGTATCTATGTCCAGTC[A/G]TCAAGCCGACGTCGTTTTATCATATCTTTC
>A01_1082180
TAAAGCATACCTTAGGGTGAGAGAAGAAAG[G/A]GTGAGCAAGAACTTTGTATGGATTGAGAAT
>A01_1082279
ATATTATATCCTCGTAAGAATAGAGTGACC[C/G]GAGAGTTCTAAACGTAGCTAGTTGGGTTTG
>A01_1082408
GTAAATGGTAAGTTATAATATATTCTAGGA[A/G]AAAATATTGTTTCAAAAATATACTTTTTTA
>A01_1082439
AAAATATTGTTTCAAAAATATACTTTTTTA[T/C]TTTTTCAATATATTATTTAATGAAAAATTG
>A01_1083437
CTTCTCTGTTTCTCAAACTAAGTTCGATGG[T/C]CCAAGCCTCCACCAATTCATCTCCAAAGCT
>A01_1083489
TCCAAAGCTCAAACTTCCCTTACCGCTCCT[C/G]AAACCGAATCTGAGTAAGTCGCTTGAACAC
>A01_1083903
GTTTAGCTATTGAAAATTTCGAACTTTACA[C/T]GAGATTAGAGTTCCAATTTAGCTGCAGTAG
>A01_1083972
TTGCTCACTGCAAGTTTTGTGTTCGTTGCT[G/A]TTCAAAGTCTGGACCTTTACATGCTATTAC
>A01_1084404
CGCCATCCGTGACAACGCGGAGCAGAGAGT[G/A]TGGCAAAGACTCAACTACTTCTGGTTCCTG
>A01_1084665
AATCAACACTCTTCTCTCTCTAGAAGAGAC[T/C]TACGCAGACATAACTCCTGTCAGAATCTCT
>A01_1085010
CATGGGTTTGAGGTTTGCTGATCTTTTGGA[C/T]AGACTCTCTTTGGAGTTTCCTGAGATGAGG
>A01_1085079
TACTTCTCCTCATCCTAAAGATTACCCTGA[T/C]GATCTGCTGTATCTGATGAGGGATAGGCAT
>A01_1086627
TACTACGCTCTGTTGCCTGCTCCTTTCCAT[G/T]TACTTACTATTGTTAACTGGAAACACTGAC
>A01_1086807
CGATCATAGAAGATTGTGAACTTTATTAAT[C/T]ATCAAAAGACACGAGAAATGAATCCTCACT
>A01_1087061
TTCTGATTAGTTAATTGTGAACCGACCTTG[C/T]ATTAACATGTGTACCTCAGCTTTATATCAG
>A01_1088266
ATTTACAATCTATCTAACTAGATTTTATCG[A/C]TTTATATAGCAGCTAAGAAAATAGATGTAT
>A01_1088555
TGAATGTTAAACTTATTCAGATAAAAAAAA[T/A]TTTACAATAAAGTACAATTTAATTACCCTT
>A01_1088867
ACAATTTGCGACCGTACGTGTAGTATCTAC[C/T]GAAGTATATATATGTGATAGTGATACTAAT
>A01_1089109
TAAAAATATAAGTAGTAATTAATTGTGTTA[C/A]ATATTTTTAGGCGTGACAGAGACCATAGGG
>A01_1089480
GGATCGCCGGTTTCTTGGTTTTGACGGCCG[G/A]AGTTCTTCTCCTTTCATGGCTCTGGTTCCG
>A01_1089884
GCAAATGGGAAAAACTAGGAGTCATATAGC[T/G]ATAGTTAATGAGTTTTGTAAATATAATTAA
>A01_1090286
CGATTTATCATTTACCTTATTTTCATTCCA[T/G]CTTCTCGTTTTTATTTTTTCTACGTATTGT
>A01_1091247
AAAACTGCTGATGAGCATATCTCCTGGTGA[A/C]GATTTGGATATTCTTAAACTCGAGTTCCAA
>A01_1091319
GGGTTTGATTTGTATCCCCATCAAATTCCC[C/T]GGCACTAGACTTTATAAATCCTTAAAGGTC
>A01_1091416
ATCATAAACTATTTTAGTTTTTGTTAGTCA[T/C]ATTTGCATGTAAATTATTAGGGTTTAACTT
>A01_1091964
TCCGTGTCATGTCGCTATCGAAAGTCTTCT[C/T]GACGTGACACTAGAGTACACGCACGTGTAG
>A01_1092163
CAAGGAAAACGTCCCTCATTAATGTTTCAA[T/C]CAAAACGCGTTATCTATTTTTCTTTTCACA
>A01_1092232
TAGTAATACAGATTTTATATAAATTTAATT[A/G]ATTGCAGGAGGAGAATATGGAGATGAAGAG
>A01_1092292
GGCGTAAATTGGAGTCGGGAAAAGAATACG[G/A]TTGGTCAGATTATATGTCTCTCTCTTTTAC
>A01_1092636
ATAACATATGTAGGCATGCTTATCTTATAT[A/G]AATTCAAAGTATTTAATGATATACTTGGAT
>A01_1092926
ATCTTTTTTATGCAGAGGATTAATGGAACG[G/A]CAAACAGTAATATTTGCTTCACACCCTTTG
>A01_1092997
AAGGCTATGTCCCGGTTTAGAACTATCTAA[A/G]CTCGAAATTTCCATCTTTCTTCACCAACTC
>A01_1093182
TAGACTGGGACATGTAACTTAAGTACTAGT[G/A]GCATAACCCATGTTAAAATCCGATTATCCA
>A01_1093339
ACATTAATTATCATACATTCCAATGAAACT[A/T]AGTCAGTTGTAATCTTGTACATGTAGTTGG
>A01_1093553
AGAAGGAGAGAAGCAAACAAATATATTTTT[A/T]AAATATAGCAGAGAAGAGAAGCAAACAACA
>A01_1094048
AACGCAACTTGAGATATGATTCCATATACA[C/T]GTATGGTTTTTGTGTAAATTGATATGATCC
>A01_1094088
TTGTGTAAATTGATATGATCCTAGGCATGT[T/C]TCAGTTAAAATTTCTATCTAGTTTTTTACT
>A01_1094167
TACATTTTTTTGTTATTGCCATGTAATATA[A/G]AGTTGTTCATAAAATAAATCCACCAAAAAT
>A01_1094436
TTCCATTATTATCAAATTCGTGGAGCCTTT[T/C]TATTACACCTTCGACACCGCCAAATTTCAT
>A01_1094538
TACTTTGTGTTGAAGTATAATAGCCCGATA[C/T]AAAAATTCATGTTTCAAATGTGATTATAAG
>A01_1094806
TTGGATTTTATTGCTTGTGAGTTATGATGG[A/C]TCAAGAGAGAAACTTATTAGTATTTCGTTA
>A01_1095601
TTATATCATTTCATGCAAAGCCTTGTCTAA[C/T]AAAGATGAATTACCAATATGTTGGTGTTAG
>A01_1095857
ATGCAAGTGGTTTTTCATTCCCAGATTTGA[G/A]TGGCACTACCGTCATGACACTATCAACATT
>A01_1095901
ATGACACTATCAACATTTAATGTAATGTTT[A/C]CCATAAGACACAAATGACTCCTTTGGTGTC
>A01_1095976
TCTAATTATGATTGACTCCAAAACATGTGA[C/A]GTACTAGATGATGAATTCTTATTTGTGAAG
>A01_1096197
TTATAATTCAACGACAGGTTCGTTATAAAA[A/T]GTTTAGTTTCAATCAACAACAGTAAAACTT
>A01_1096515
GAAAAAGTGACATGAAAAGGATCGCAACGA[T/A]GAGTCAAAGGCGCGAAGGCTAACAAACGAT
>A01_1100591
TTAATCATTCTAGTATTGGAAATGTTATGA[G/A]ACAAAGTTCTAGAGGTTTATGTTTTATCCC
>A01_1100635
GGTTTATGTTTTATCCCTTGTTAAAATGTC[A/G]ATTACTAGGGTTGGTAATTCTCTAACCGAA
>A01_1100704
ACCACTCAACACACAAACATGATATTATGA[T/G]TGAATAACCTTACTTTGAAAACCTAAACAT
>A01_1100741
ACCTTACTTTGAAAACCTAAACATGGCACA[A/C]TAAAGAGTTTAATATGTCATCAAAAACCAT
>A01_1102357
TTCGAACTATGAAATCACGAGTTAAACACA[T/G]TATCGCAAGACTACTTGTCGGTGTCGGTGG
>A01_1102397
ACTACTTGTCGGTGTCGGTGGGTGGTACTA[G/A]CGTAAAATGATATTGGGGGTGTAAAACTGC
>A01_1102461
ATGAACCATCCATTGCAAGAGAGCAGCACA[T/A]TCACATGTTTGAGTGATTTAAATAAAGTTG
>A01_1102680
GTATAATACTAATATATGCAATAAATTTTA[G/C]AAGGTAATCAAATGATTTAACCAGCTGGAA
>A01_1102905
GAACATTTTCCAGTATAAACACTTGGATGA[G/A]CCATTTAAACAAGAATATTTACCCATACTC
>A01_1102968
ATCTGAACAGCTTAAAGACATGTTTAACTG[G/A]TGTATATAACCATTTTCCAGATAAAAACTA
>A01_1103007
ACCATTTTCCAGATAAAAACTACACACATT[T/A]ATTCAGACACGACAAAAGCAGAAGAAAAGT
>A01_1103320
CCCACAACAATATTCACATTTATATATTAT[C/T]ATTATAATATTAACCTAAGGAATACAAAAA
>A01_1103557
TTAATAAAACAAATAAATAAAAGCTTAAAA[A/T]TGGTGGGAAAGCGTCGGTAGCCCACGTAGT
>A01_1103637
TGTGAATTGCAATAAAACCCCTTCCTCCTC[T/C]CTTCCTTTCTCCTTCGTCTTCTTCCTCTTT
>A01_1103772
GCTGAGAATGGGGACTGGTGATACTGCTCC[A/T]CGGCTGATTCTCTGGCTCTGCTTAGGGTTT
>A01_1103989
ATTTTTTCTTGGTGGGTTTAACGAAAAATC[C/A]AAACTTTAATCAAAGGGTGTTTTAAAGTTG
>A01_1104187
AGTTCTGTTCTTGTTTTCGTACATTATGTT[C/T]TTTCATTTGTTGACGGTTCTGTCTTCCGGT
>A01_1104929
TGCCCCTGACCCTGTGGTTAGTTTCTTGTT[G/T]TAGTGAAGACTGAACTCTATATTGCTTTGG
>A01_1105031
CAACGGTTTCTACTGTGATTCATTTGCTCC[C/T]AACAAGCCATACAAGCCATTAATATGGACA
>A01_1105318
TTAAACCACTTAAATAAATCTCAGTATAAG[A/T]TTTGGTTTCCTAAAGGCAATCTTTCTTTGT
>A01_1105425
ATTTGTCACCACCAGCTATGACTATGATGC[C/T]CCCATTGATGAATATGGTAAGGGCAGGAAA
>A01_1105801
AAACTATGACACAGAATCGGCAGCAAGAGT[G/A]TTGTTTAACAACGTTCATTACAACTTACCG
>A01_1106005
AGTTCAAACATCACAGATGGAAATGTTGCC[A/G]ACAAGCACACCGAACTTCCAGTGGCAGAGT
>A01_1106389
TTAATTTCCATTATAGAGTTTCTGATATGC[A/T]AAAACTAATATATATAAATAAATTCACAGG
>A01_1106450
TTCTGCCTTTGGAACAAGGCAAAACAGGAG[G/A]TTCACTTATAGGGGAAAGATCAATCTACAT
>A01_1106487
TATAGGGGAAAGATCAATCTACATTCTGGA[A/G]CTAACAGAATTGCTTTGCTGAGTGTTGCTG
>A01_1106746
AAAAATGGACTTACCAGGTGTTCTATCATT[C/T]CCTAGTGATTCCTCCTCTCTCTCGGTTTCC
>A01_1107080
AGACATGGAAGGAATGGGGAAAGGTCAGGT[C/A]TGGGTGAACGGAGAGAGCATCGGGAGATAC
>A01_1107392
GAACTGGCAGATAGAAAGCTACGGGAAAGG[A/G]CAAACGTTTCGTAGACCCAAAGTTCATTTG
>A01_1107734
TCCGTGTCCGAATGTGTTGAAACGGTTGAC[G/T]GTTGAAGCTGTGTGTTCCCCTGAGACATCT
>A01_1107932
TGTTTAGTTTGAACAGAAGACTTTGTTGGT[G/T]TAGAGTAGTTTTCAGTTAGGTAAGAACGAA
>A01_1108022
CAATTCCGGGTCTTATCAAAAAAACGTTCG[G/T]CTCACCGGTCATCACCGACCATTTTACCGG
>A01_1108175
AGAAAGGAGATATTATTGAGTATTGTGTGA[C/T]CCATTTGTTTCCAATCTTGTTGTTTCATTT
>A01_1108298
TCTTGATAATCTGTCAATATATAAAAGGCT[C/T]ACCAAAAATAAACTAGTGTATTCAACTATG
>A01_1108590
GTGAGAGTTATTGGTTGGTGTATTTTAATT[A/G]ATTTAAAAATCTAAACTAGATCTATTGTTA
>A01_1108879
TTTTACTTGAATTTGTAAATATTGAATGAA[A/T]TTCTAAATCAATCAAAATATATAAACCAAT
>A01_1108999
TAAAAATTAAAATCATTCAAAATCACTTCA[A/G]TTCACAAATTGAATACACAAAGAGATTGAA
>A01_1109395
ATTATGTTTTTTTTGTCATCATGGATTATG[G/A]TTTCTTTCCAAATTTATTGATTTATCACTG
>A01_1109442
TTGATTTATCACTGAATCAATTTACATAGA[T/G]TTTTTTGTGAGTAAATAGTTATCTTTTAAA
>A01_1109529
ATGAACATAACAATTTGCTCTATTATCTCT[A/G]TAGTCTTATACACATACAAAAATCACATTG
>A01_1110485
TGACATTGCTAAAGATAACTCACCAGCTTT[A/G]GTTTTCCAAGGTACATTAGAGCCTTTTGAG
>A01_1110790
TATGAGACTCGGAGCTGATGCCATCGTTTT[C/T]ACTCGCTCAACTCGTGGAGGGTATTTGATA
>A01_1110845
TTGATATATCTCTTTTGAATTTGGTGTATG[G/C]TCTTGTTTTTTAATCTTTTCATTTTTTTAT
>A01_1111090
TTGTATCTGCAATGCAGATTGATATTGATA[T/C]ATCCAGTGATCTCCCCCAACCAATTATTTA
>A01_1111577
CTAAGATCTCATATCTCATACCGTTTCCGA[T/C]ATTCTCTAAAGGTAATTCTTCTGAATATCC
>A01_1111611
CTCTAAAGGTAATTCTTCTGAATATCCTCT[T/C]ATTGTTTTTTTTTGTTCCTGTTGCATAGAT
>A01_1111696
TATCCTTAGGCTTACATATCCATGTTGTAT[C/T]TCAAAAAGTTCAAAAACTTCAAAATTATTC
>A01_1111728
CAAAAAGTTCAAAAACTTCAAAATTATTCT[C/T]CGGGGAATCCCTGTGGAGCAATTCAACATT
>A01_1111770
TGTGGAGCAATTCAACATTGCTGATGAACT[C/A]AGATATCCTGAGACTATAATGTACAAACCT
>A01_1111987
GTCACTGAAATTAAAGTTGGATTCGTCAAG[G/A]AGGCACCTAAACTTCCAGTATGTGGTTTCA
>A01_1112069
TCATCATGGTACGTTTTGATGTAGCAGATG[A/G]AGTAAATTTGTTAGCTTCCGCTTTTGTATA
>A01_1112148
TCCCCTTGCACCATTTACAGCCTTTCTGGA[G/A]GGTCACTCTGAGCGGTTCGACTAGCGGAAA
>A01_1112354
CGATAAGCAAGATTTTGAGAGGTCTTCTCT[A/G]TTCCAGCGGCTGGAGGCGAGGTTGAAAAAG
>A01_1112658
CCTTCTGACAAAATTAGTCAGGGTGGTCCG[C/A]TAATCCGTGAAATCAGTCTTAGTAAAGGCA
>A01_1112689
TAATCCGTGAAATCAGTCTTAGTAAAGGCA[C/G]TTCTAGCCGTGCACATAAGTCGAAGAGGAC
>A01_1112820
CAAGGTGGTCTGATAATACGTGAAATCAGC[T/C]TTAGTAAAGGCACTTCTAGCCGTACAGTTG
>A01_1113914
CGGAGATGTCTCACAACGCGAAAACTGTAG[T/C]CGCCGCCGACGTCGTGCATTTAGACAGTGA
>A01_1113951
CGACGTCGTGCATTTAGACAGTGACGACGA[C/A]GATGACGTAGGAGGAGGAGGAGGAGGAAGA
>A01_1114238
TGCTCGTGTTCATCCCAAGTTCCTTCACTC[T/G]AATGCCACGTCACACAAATGGGCCTTTGGA
>A01_1115275
TCTCGCAAGTCAGCTTATGAATATTACATT[G/C]CATCACTGTTCTTCCTTGATTGTGTCCTAT
>A01_1115374
GTTGTATTAATTCGTGTATATTCATCTTTC[G/C]TCCACCAGTTTGATGATATTGGAACGCATG
>A01_1116011
ATTCTTTCTGTTCTCTAGTTTTGTTACATG[T/G]ACCTTTGGCTAATTCTTTCTTGTTGCAATT
>A01_1116292
TTCCATGATCTAGATCATCTATAGAAGCAA[C/T]TGTAGTAAGTTTACTACTCAACGATTTAAG
>A01_1117716
CAGGAAAACTGTTAGGATCTAAGGTCAGGG[G/A]ATAGTTCTATTTTAAGTACCATAAGTTCTG
>A01_1117816
TGTGAGGACTAAGAAAAGAAGTGGTCCTGC[C/T]TGTTACATAAAGTATGAATTTAATTTAGTT
>A01_1117978
CAATAGTGGTTGTCCAAAAAAAAAGAACAA[T/C]GGTGAAGGTAAACATGCAGTGATCTTTTTT
>A01_1118057
CAGTGATCTTCTGTAGCCAATTTGCATCCC[A/G]ACTGGGATCAAATGGATAATGATTAATGAG
>A01_1118398
CTACTTTAAGATAAAACTATATATTAGTAA[T/C]TTTTTACTAATTAAAAGTAAATTTTCATTT
>A01_1118723
CTGAAATTCTCCATGTTAACAAAATATATA[T/C]CAAAAGAAAATATAGTTTTAAAATGGAAAT
>A01_1118844
GTTATTATATGGTTGATGTAGATATCCAAT[C/A]ATAGAGAAGACATTTCTCTAAAAGACTCAA
>A01_1118927
AAAAGCCACATTTAAAGGCTAAGAAAATGA[T/C]AGCCATTACATTATAATACAATTTAATTTA
>A01_1118981
TAATTTATTTTCTTTACATTCTTGTTGTTC[C/T]CATTTGCTCAAATGTACTCCTTTCATGAAG
>A01_1119894
CTCAAAAGTGCAGATCAATTCAACAGGTTT[C/T]GGGTCAACCGCAACATCTTGAACTCAAGAA
>A01_1120040
ACTTATTAACTTAGTATTTGTAGTGTATCC[A/G]TATATCCATCGGATAGCATCGCATTCGTGT
>A01_1120149
TTAAAGGAAATTGTATACAAGTTTAGATTT[C/T]TTACATATTTTTGTGGTGAGTTGTGAAGTC
>A01_1120414
ACGAAATTAGTCGCCATTTTAGATATAGTT[C/T]TCTAATTAAAACGTTATACATTTTATACCT
>A01_1120574
CATCTCATTTTGCATATTTTTCATGATATG[A/C]CATTTTGTAATATTCAAATTTCCAATCATT
>A01_1120604
ACATTTTGTAATATTCAAATTTCCAATCAT[T/G]ACTTTAAATTTTTTTTAAACTTCATATAAT
>A01_1121048
CTCAAGAACGAATATTAATATGTTCACTTG[C/T]TAAATCAATAAAAAGAGAACATCTTTTCAC
>A01_1121246
CGTAATAATATTATCATTAGTTTTTGATGC[G/A]TTGCCTTAAATAACAAAAAAATTCCAACCC
>A01_1121674
TCCATATATGTATATATATTATCAGGAAAT[G/A]TAAATTTAGTATCGGATTGTAACATCGTTT
>A01_1122171
AAAAAAAAAAAATAAGTAACAGTATAATTT[C/A]CTTAACAAAAAGTAAAATCGTTTAAATTAT
>A01_1123651
ACGCCGTGAGAGACAACAGCAGGTTCAGAT[G/A]TCCACATCTGGAGGCAGCGGCAATGGAGGC
>A01_1124040
TTGATAAAAAACATTAGATTGGCTTTGAAA[G/C]TGTCATATATAATTTAACCTGAATAACAAT
>A01_1124451
GGATCGTCGACGATGTTTGTAGATCCTAAT[G/T]CGAGTGGTTACTATTCCAGTAACATGGCGA
>A01_1124673
CTGCATGTTTGTTTATTTGTAATGTGTTTA[A/G]TTTTATATTTCAACTGTACGGTAATGGATA
>A01_1124775
GTAATTTTTTTGGTTCTCGATACGTTTTTC[T/C]TTCCATGTTTATGCCGATATTGCCGGTTGG
>A01_1124839
AACACGAGAGATTCTTTATGTTATAATATT[A/G]AATAAATTTAATATTTTCATAAGGTAGACT
>A01_1124917
AAAGGTAAACTAACTAAAGTAAATTAAATA[G/A]TGATAACGACAGGAAAGCAAATGAGGGCAA
>A01_1124960
GAAAGCAAATGAGGGCAAATATTTTCAAAA[C/T]ATAAGTTACGATTATCGTACTGGCCGGTCC
>A01_1125144
AGGGAACAACTCGTGGATTTATATAAATTC[C/T]TCTTGCATCACGTGCCTATGGTTAGAGCAG
>A01_1125303
GCTAGTGTTTTTTTGGTGTAAACTAACTAG[C/A]TAGTGTTACTAACTTTAGATTATACAAGAC
>A01_1126865
TCGTTAAATTTACTTTTAACCGGGTTTACT[A/C]AGAATATACCACGGTAGAAATATATTAGAT
>A01_1127543
AGTTTTAAGGTTCTCGTCCTTGGTGAATGC[A/G]TAGATGGCAAGTGGCTTTGGTTTTGACTTG
>A01_1127750
AAATTAGATGAATTTAAAATTCAAAAAAGA[G/A]AAATTATATTATAAAGATGAATTTGTTCCA
>A01_1128293
TTCAATCTATAGAAGAAAAAAATCACCAAA[A/C]TCTTAGAGATACTACAGATACAGCATTTTC
>A01_1128330
AGATACTACAGATACAGCATTTTCATTTGC[A/G]TTTGTGTGTAGACTTACCAGAGAAGACGCA
>A01_1128558
CATGTCCTTGGAGACAGAGTGGTGATCAAC[A/T]ATGGTGGGACATTTTCCACCAAGCTCCAAT
>A01_1128618
TGTCACTGGAGTCAAATGCTCTGCAGCTGC[C/A]GCCATTATGATTTTTCCAATTCTTGGACTC
>A01_1128837
GTTGTCGAGATAAGACGGGATTGTCTTGGC[C/G]AGGAAGGCAGATGCGTTAGGGCTTAATTCA
>A01_1129291
AAATGTAATAAATTCAATATTTTCAAAATT[T/G]ATAATTTACGGTTATTACCGAATATATAGA
>A01_1129967
ATAAATCGTTATCATGAACGTGAAAGTCAA[T/A]ATTTTGAATTAAATCTTATACAAGTTGATA
>A01_1130713
AACACCCATTTGCTTTAAATTCAGTAGATT[A/C]TTTTTATATCGAATATAATGTTGCATGTTT
>A01_1131273
CACCAAATATACAAGTCTAACAATGTAAAA[T/G]AATAAGTTTATGCTATATTATGTCATATAA
>A01_1131878
AATAACAACAACACTTCCAAGTAAAAAAAA[A/C]CATGAACAGTTACAAAAATAAAAACCATGA
>A01_1132270
ATTGGTTTGTTGATTAATGACGAGACATTG[C/T]CAAACAAGTCTCCCAAATCCACAAAACCTA
>A01_1132568
TCTCCGTCGATGACCTTCTTGACTTGTCTA[G/A]CACGGACGCTTTCGTACGAGAGAAGTCTTC
>A01_1132628
CTTCTTCACCAAGAGAAGAAGAACGTGAGA[A/C]AGCTAACAGCTCTTCCGACCAAATCACCCT
>A01_1132731
CTCTAAGCTCAACGTTCCAGTGAGTCCACT[T/C]GCGCACTATGTTTCTCTTTCCCTTGTTATT
>A01_1133160
AATGCGTGTGGGGTCCGGTTTAAGTCGGGT[A/C]GGCTTTTACCCGAGTATAGACCGGCTTGTA
>A01_1133231
TTCGACTGAGATTCACTCTAACTCACACAG[A/G]AAAGTGTTGGAGCTGCGACTGACGAAAACG
>A01_1133281
TGACGAAAACGGCGGATCAGGGTCAGGGTT[A/G]ACCTGTTGTAACCTATGTTTCTAGTTTACT
>A01_1133343
GTTTCATATTGTTATTCATATGCATAATGT[T/A]ATTTTTTTTTAGATAGACTACATCAGTAAG
>A01_1137588
ATCGAAATTATTCGTTCCTGGTCCAATATG[C/G]TTGAATTCGGAGTAAAACCAAATTATGTAC
>A01_1137911
CATATGATATACAGTCTTTTTTTGTAACGA[C/T]GTCGTTTAATGTTTAAATTGCAATTAGCTA
>A01_1138182
TTATCTTTTCTAGAAAGATTGGTTAATGCC[G/A]GAGAACGAGTGGTTACATAACTTACCGACC
>A01_1138475
TAAAACATGTGTTTGATTAAGTAACATAAG[A/C]GTTTTTCTTTTAGATACAGAAGATATTAGG
>A01_1138819
TATCAATGTCAACATGGTCCCACGTTTGAT[C/A]ATATTCAACCGAGCAGTAAACTAAAAACGT
>A01_1138901
AATTGTGCTAAACAGATTTTACCGCTGCCG[T/A]ACAGGTATAACGCTTTCATTGTTTACTAAT
>A01_1138939
TAACGCTTTCATTGTTTACTAATCACAAAA[G/C]CAATACAGAATGGTTTACTGCAAAAGTTAC
>A01_1139230
TTACACTCAGCATTCTTGTATTTACCTTTT[T/C]AGTTTGTAATTATTCACTAATTACTCTTTC
>A01_1139268
AATTATTCACTAATTACTCTTTCTTACCGT[A/T]ACCGAAAGTGTTATTAAAAACATTACACCC
>A01_1139321
TTACACCCAACTTTGTTGCCTTCGAGAGCC[C/A]GTCTTCGAAAATGTCAATCTCGTATACTAT
>A01_1140178
AATGTTTTTTTTTTGCTTAAGATATCTTTA[C/T]CAATGTTCGAAAGTAGAAAAACTACAATTG
>A01_1140276
TATTATGTTATTGAGGGAACATATATTTAT[G/A]CCACCAATTTATTCTAGGTAAACCAAGTAC
>A01_1140306
GCCACCAATTTATTCTAGGTAAACCAAGTA[C/G]TCATTAATATCAACAACTATTTTTATAGTC
>A01_1140612
GGCGAACTTTGCCTGATCAATTCCTGAGAC[C/A]TTCCACAAACAATAAAAAAACATTTTCCAG
>A01_1140696
TCTTCTATATCACAAACACTAAGCCAAGTA[T/A]TAGATCCCACCACGGGTATTCTCATCGTCG
>A01_1141022
AGCTATAAGCTATTTGACTTATGACCGAGC[T/C]GACATGGCGTTTGCTCACTACGGACCGTTT
>A01_1141076
ACCGTTTTGGAGACAGATGAGGAAAGTTTG[T/C]GTCATGAAGGTGTTTAGCCGTAAACGAGCC
>A01_1141202
TAAGTTCGCCCGCGTGTTCACACTCTCTAT[G/A]TGCGGTTAAATATTTTAAAAGAGAACAATA
>A01_1141692
GAAATTAGTGAGCGAGACAGCGGATCTTCA[G/A]AACTCTATCAAACTTACCCGTGACAATATC
>A01_1141745
ACAATATCAAAGCAATCATCATGGTAAATA[T/A]TTTTCACGAGGCACTAGTAACAGTCATTAT
>A01_1141996
TATAACGTCATGTGTGAATTGACTTATTTT[A/C]TTTTTTTAATAGGACGTTATGTTTGGAGGA
>A01_1142412
TGGGCGCGACAAGAACTCTTGGGTTGACCC[C/T]GAAACGTTTAGACCGTCTAGGTTTTTGGAA
>A01_1142664
TCTGACGGCTCCTAAAGCCACGCGTCTCTA[T/C]GCTGTCCCGAGCACGCGCCTTATTTGTTCT
>A01_1143121
ACCTAATATGTTAGAGAAATTTGGAGACGA[C/T]AACTTTCAATTTTTAGTTTTGAAAAGCCAA
>A01_1143447
TGGCAAAATCCATGTCTAAACTACTCACTT[C/A]AAAAATAATGTTACAACCAGAAGGCATCAA
>A01_1143578
GTAGCTACACGTAGCACATTCATAAACATA[T/C]ATGTAGTACCATACGTGGACTATCGAATAT
>A01_1143818
AAGCTGTGAATTATGAAGCAGTCATCGCTA[T/A]TATTAGCTCCAAGCCAAACCTAACATTTAA
>A01_1143923
GTAGGGTTTGTCATTGTCTTCTAGATAAGA[A/C]AGCTTCTCGACCCATCTCCTATTCAAGTTA
>A01_1143954
AGCTTCTCGACCCATCTCCTATTCAAGTTA[T/C]ATATACTGTTATAGCAGTACCACCAAAAAA
>A01_1144002
TACCACCAAAAAACTGAGAATGCGCTTAAT[C/T]TGTGGCTTTTAATCATTTTTCTGAAAGATT
>A01_1144272
GAGCGCTGAAGAAAATAACATTTACATCAT[G/A]GACATCTCTCAAGTTATTTGTACACCCTTT
>A01_1144448
AAAAAATATTGTCTGCAAATTGGGACTATG[C/G]TCAGTTTGAAAGGTATGACAAATTTAATAT
>A01_1144806
AAACTCATAATGTCTACGTATAATTAATTA[C/A]TTACTTTTTGTTCTTGTCAGTAGTTCAAAC
>A01_1145093
CCATCCACCATATTGTGTCACATAGTCACT[G/A]TAATGTTGAGATCGAGAGGTAAATGTTCTT
>A01_1145179
AAAATTTTCTCTACTCTGATCATCACACCT[C/T]CTTACACCAATTTGAAAATAATTGTTGACC
>A01_1145669
ATTTATATCAAACACTAGGAACAAAAACTT[A/C]TACATTTGGCTCCAGCAAAAATACATATAA
>A01_1145726
ATAACTATATAAGTAACAGGTTAAGCACAA[G/A]AATACATATAAGTATACAGCTCAACTAAAA
>A01_1145805
ACGGGTAGGTAAATAGCAGTCTCTCCACGG[C/A]GTATTTATGTCAGTGAAATGCGAAGAAACA
>A01_1145846
CAGTGAAATGCGAAGAAACAGGCGTGCCTC[A/G]CTACCTAGCGTGTAAGATAACTAATTGGAT
>A01_1146060
AACTGTTGTTTATTTATTATTTTAATATTG[C/T]AATTGTCTACAAATTTATAAAATAATTGTC
>A01_1146093
TTGTCTACAAATTTATAAAATAATTGTCAC[G/T]GTTTTATGAGGTTTAGCCCCTAAACATATT
>A01_1146243
TGTGACAATAGAAACATATAAATAAACTTT[G/T]TTTTAGTTTATGGATAGATTCACGATGTAA
>A01_1146295
ACGATGTAATATATTCGTAACGAAATAGAA[C/G]ATGACACGAATATAGGTTTAAATTTATTTA
>A01_1146365
TGTATTTGTCATAGTTAATAAACATTGTTA[T/A]CTTCTTTTTTTTTGTCAACTAAACATTATT
>A01_1146811
GAGCCTCTCTAGGATTTGCTGAGTCTTCCA[T/A]AGATATGAAGAGTGACCTTCCACCATATCG
>A01_1146898
ATCAAGAGGTGAAATAATACTAATTAACAA[C/T]AGAAACTTTATAATTATCGAAAACGACCTC
>A01_1147108
TTAGGTAGGTAAATAAAAACTGAAATAATG[T/C]AAGTGTTAATATGTAATGAATGGGGATAAT
>A01_1147607
CCACGAGAGTAATGGGTCTGATATCACATA[A/G]TTCGAGGCATAAATCATATACATATAGATA
>A01_1147955
ATCTATGAAATCTGCAGCTACTAAGATTGT[C/T]GCTGGCCATGCCAATGCCAATAAAAGAGAG
>A01_1148109
TTTGACAATTGTTGTCACATTAACATGGTT[G/A]TTTAGTGGGATGAAAACCAATTACTTGAAG
>A01_1148584
TATGTTACAAAGATCTAGTAGCTAATGGAA[A/T]ATAGGCACTCACTCCTTGATTATGATTTTC
>A01_1148702
CCCTGTGAGACCAGCTCCAGCAGCTGGATA[C/T]GAAAACATTTTTAAAAGCAAGCATTAGTGA
>A01_1149698
ATCCTCAACAGATTTATCATCTTCAACAAC[C/T]TCAGGATTATGGCTTCCATCTCTAATCACT
>A01_1149769
CAAGACTCTCTCTTTCAGCAGCAGCCTCCG[A/C]CTCCTCCTTATCCTTAACCTTATCCTTCTC
>A01_1149879
TTTTCGTACTCCTGATGCTTCTCCTTCTTA[G/A]CATCTATAGATAAAGAGCTCCGAATGCTAT
>A01_1149932
AATGCTATGAACCATAGCGTCAGCAGCTTT[C/A]GCTAAAGCCATCTCTTGCTCCACCATTTCA
>A01_1150045
AATCAAAAATAGAAGTTAATGAATGAACCA[T/G]CACTTAATCAAAACGCTACCGTATCGATTC
>A01_1150103
TTCAAGAATGAGCCATACCGCACCGATGTG[A/G]TGCTTAGCGGGAGAAGAGTTAGCTGTTTCC
>A01_1150579
TCAGATTTTGAAATCGCCGAGGAAGATGAA[C/T]CCGTGACTAATGTTGAATGAGTCAATCCTT
>A01_1150973
GAGGTTTCATATATAAAAGTTTGAAACGTG[C/T]ATGGGAGATTAAATGTACATGAATACAAGT
>A01_1151122
AGATGGAACTTCGAAGCACTCCACGGCACT[C/G]AGAGAGCCACAAGTCCATGTGTTCTATTAT
>A01_1151168
CATGTGTTCTATTATATGTTGCCTCACTTT[A/G]TTCACAGCATCTGGTGAACTGCAGTTCTTG
>A01_1151656
CAGGTTTGTTGCATCGACTTCAGGATAAAC[A/T]CCTTTACCAAACAGACTCTTGCATAGATCC
>A01_1152966
TCTAGTGAAACAACACCTGCTTCAAACTTC[T/C]TTGCTAACACCTAAAGAAAATTTCAGAAAC
>A01_1153213
TGAAAAAAAAAAAAGCATAACTATTTATAG[A/C]ACACACAGAATCTAAAAAAAGTCTCCCTCT
>A01_1153558
TTTAGCTTGCAAGGACGACAATAATGATTA[G/T]AAAAATTGTTTCCGGAATCTGTGACAAAAA
>A01_1154652
GCCGCGTTCGGCGCTCTTCCCAACCTCGAA[G/A]TCATCGCTCTCGACAACAACAATCTCACCG
>A01_1154733
TTCTGCAACACGTCGCTAACGATCGTTCGG[T/G]TGGGATCCAACGCCTTCTCCGACGTCGTGA
>A01_1154940
ATTCCGGCGGAGATCGGTGGCTTGAAGTTG[T/G]TGGAAGAGCTCAAGTTGGCTAATAACTCTC
>A01_1155401
GCTAACGTCTCTTGATTTAAGCAAACAGAA[C/T]ATGTCCGGTGAAGTTCCGGTTGAGCTTTCC
>A01_1155440
TGAAGTTCCGGTTGAGCTTTCCGGTTTACC[C/G]AACTTGCAAGTGATTGCGTTGCAGGAGAAT
>A01_1155478
AAGTGATTGCGTTGCAGGAGAATAACTTCT[A/C]CGGTGTTGTCCCTGAAGGGTTTAGCAGCTT
>A01_1155617
GCTGGGGTCTCTGTCGCTGTCGGATAATCA[T/C]ATCTCCGGGTCTATACCGCCTGAAGTTGGA
>A01_1155936
GAGATTCCATCTACCTTATCCCTCATAGCA[A/G]CCAACTTGGTGTACTTTAATGTCTCGAGCA
>A01_1156175
AACGCTCTTCTGCTGCTTCTACATCTACAC[T/A]CTCTTGCGATGGAGAAAGAAGCTGAAACAA
>A01_1156310
CCGGTCGAGCACGGAGAACGGAGAGCCGAA[G/A]CTAGTGATGTTCAACAACAAGATCACTCTA
>A01_1156604
TTTGAGGCTCTTGGTGTATGACTACATGCC[T/G]AATGGAAACTTGTCTACTCTCCTCCAAGAA
>A01_1156652
TCTCCTCCAAGAAGCTTCTCACCAAGATGG[T/C]CATGTCCTGAACTGGCCAATGCGTCACCTC
>A01_1156819
CATAATTTTTTAGAAATTATCCACAATTTA[T/A]TTACTTTTACGCCTAAAACTTAAAGCATAA
>A01_1158048
TTTAACCAATAATTATAGTGTTTAGGGAAA[A/C]CAAATCATTAATGCGCGGCTGATTTTAAAA
>A01_1158906
GCCAATGATTTTTTTCCTTCACCAACGTAT[T/A]TTATTTTTTTGAAACTGTTCACCAACGTAT
>A01_1159018
ATCACGTACGTGCGTTATCCGCAATTACCA[G/A]TAATTATACACATTTCCTTGCTTCATGATC
>A01_1159127
TGGTGTATTTTTCCACTAAGAACTTAATTA[T/C]TTGCAGAACGACATGATAATATTTTTTTAA
>A01_1159319
AAATGGTAAAGTTTGAATTTATCCTTTTTT[A/T]AACGTCAGTCTAAATTTATCTATGATATAA
>A01_1160242
TTTAATTTAAGGAGAAAATCATGCGTTTAT[T/A]TTAAAACAATAAGCCGAACCGTAATTAATA
>A01_1160594
CGCATTATGTCAGTGGGAGGAGGCAAAAGG[G/T]AATGAGTGAGTCTCAAGATTGTTGTGTGAT
>A01_1160704
TCATTAGTTCTTTGATCACATATACGTGAA[C/T]AAATTGTTACCGCTTGGCGATCTCTGTATG
>A01_1161311
AATATAAACTCTTTTTTTTTACGACACATT[A/T]ATATAGTAAACTTAAACTTACTTTTCGGCA
>A01_1162671
AGTTTATTTTGAGAGTTATTAAAAATTAAT[C/T]ATGTGTTTCATACCAAATCTAATATTTAAT
>A01_1168502
AAAAAAAAGAAAAAAATTTAATAATAAAAA[A/G]TTAAAAAGATGAACCCCAAGAGAGGGTTCA
>A01_1169327
GAAAAAATTATGTATACATGATACAATTTC[G/A]CAAAAAAATTTACCACTTTATAAAAACTAG
>A01_1169844
CAAATCATTTTGGTACCAAAACAAGATCAT[C/A]GCTTTATTTTTTGTTTCGTTAGATATATAT
>A01_1170007
GTTCTTGTCGATAAATCATTGGAGATAAGA[G/A]GGCCACCACTGTGGAAGTCTTTAAGAAGAT
>A01_1170679
ATAATAATACCAAGAAAAATGTGAAAAGAA[G/A]CGGGAGGAGGGTGACATACGCAAATGGGGA
>A01_1171289
AATTTGTCTTAGGTGAGTTTTTTCTCTTTT[G/A]TTTTTGAAAAACACTTTTAATACTTTGTAT
>A01_1171973
ATACTTTTTCAAAAGACTAATATTTTTTTT[G/T]AATAACCTATTACTTTTCATTCTTGCATCC
>A01_1172106
CATTTACTTGTATATATAACACATTTACTT[G/T]CATATGATGTTTTACTAATGATCATTTTGG
>A01_1172791
TTACATATTCAAATATTTAGTTATTCTCCA[T/A]CAAAAAAATACCGGAAATTACATGAACTTA
>A01_1173286
AGTCAATTTAAAATAGCTAGCAAATGAGTA[C/T]GTACCTATGCTATTGGTAGCTTTCTTTCTT
>A01_1175336
TTTTTTTTTGGTAAAAGCCAAAGCATAATT[T/G]TACACATTAAGTGGTTTAGACTATACGTGG
>A01_1175597
GAATTGAATTCACAGAGTAAGTTCATGTTA[G/A]ATTGTGAGAGCATCAAATTAGATTGAAATC
>A01_1175688
CTTCTAATATGCTTTAAACTGATATCTCCT[C/G]GATGGAGATTAACCTAGATGTATTGATAAA
>A01_1175731
CCTAGATGTATTGATAAATAAGGCAAATTA[A/G]TGGAACTAATCTTCTTCTTCTTTTTTTGTC
>A01_1175918
ATATATATTATGGTACATGGCTATAGGCTA[C/T]TGTCAAAAAGTGATGCCAAAATATAAGCAA
>A01_1176206
GTTAGCTTTACATTTAAAAATACATGTACA[A/C]TACAGTTATAGCATTTTCAAAAACATATGC
>A01_1176266
CGATGGTGAATTCAGAAATGTGAGAGATGA[T/G]AGGGTGTTCGTATTTTCATTCAAAAAAAAT
>A01_1176745
AACAATTGATAGTTTAATAATTAGTTTTTA[C/G]AAGTGTTACTAGAATATCTAGCAAATAGGT
>A01_1176936
TAACTACTGGAAGCTCTCCACGTAAGTAAA[T/A]ATAGACAGTCAGTATGTGAGTATGATTAGT
>A01_1177818
TAACAAAAACTTACCATTGTTATGTGAACG[T/C]CTAATGGCCAATTGAATTTTATAATAATGA
>A01_1177967
TCACATGAACATCTGCTATTATATGTTGAC[C/T]GTTGCAAAAGTAACCCATCATAAATTACAA
>A01_1178103
AAGTCTGTCCATTGTATATGATGGAGATAC[G/C]TGATCTGATCAACCGAAGTAGCAGAGTAGA
>A01_1178782
TGTTGAAAGCCTGTTGTCGCACCAATGTGG[A/C]GGAAACTTGAGCTTCAAGGAAGATCCAATT
>A01_1179744
GCTTTTTCAGCTTCCCCAGGGATTCTGGAA[C/G]AGCCTCCAACATTATGCAGTCTTTCAAGTT
>A01_1180190
CTATGAACCTCTACAAATGCTAAAAGCATC[T/C]CTAGACACTCTATTTTAGCATCTTTAACTA
>A01_1180687
TTTCAACTGTATTCTATTTTCACTTTATAA[T/G]TAAATAATAAATTTATTCCATGAATAAAAC
>A01_1180740
AATAAAACAATGCATTAATTTTTTGTTCAT[T/C]ATTTTATTTTTCATTTGAAAATAAAATAGT
>A01_1180826
TCTATTTTGAAAGAAATAAATAGAGTGATC[C/G]GTTGGAGATGATATAAAACATGACGGGTGA
>A01_1180861
GAGATGATATAAAACATGACGGGTGAAACA[A/G]ATTTAAACAGAGACACACCTTAACACCCTC
>A01_1181246
CAAAGATGTTAGCACAAGTAAAAGTCTCTC[T/A]GAACAGTCTAGATAAAAGGTTTTATCTTAC
>A01_1181469
GTCACAAGACTCCACTAAACACTTCACGTA[G/A]TACTCATCCCCTGATCTAAAGAAACAGGCT
>A01_1181892
CAAGCTACCTTTTTTAATCCAATCGCATTC[G/C]CCAAGAAGAACTTCAATCTGTTTCTTGTCG
>A01_1181923
CCAAGAAGAACTTCAATCTGTTTCTTGTCG[G/C]TTACGTTATCGAGAACAACAAGAGATTTCT
>A01_1182207
AACAACACCAACCGTGAGTGTACTCTCGCA[A/C]TCGAACTCTAACTTCTCTTCCAGCTGCTTA
>A01_1183110
CTTTCAAATAAAATATAACGCCCCGACCCG[C/T]CCACGGTTAATGGGCCACCCACGCCCGCTC
>A01_1183338
TACTCCAGCTCAAGCACGCTTAACTCTGGA[G/A]TTCTTTCAGGATGTGCTCCGGAAAAGGTAA
>A01_1183639
GTGACAGTGGCGTCATCTTCTTCGACGAGC[T/A]CCACTCTATCTAGCGATTTCGAAGCAGTGC
>A01_1184480
GTTTCATCAAACACTTTGACGAAGCTTTCA[G/A]TGAGAAGGGACTTCACCGTTTGTTGGAGGA
>A01_1184801
ACGAGGCTTTGCAGCTGCTATCTCAGTGTG[T/C]ATTTGGTAATGACATAAGAGATCAAAAACG
>A01_1185126
ATGTGGCTTCTTTCCACATGTTGGGATTGA[C/T]GTTCTTGTGGAGAAGTGTCTGGTGACTATT
>A01_1185353
CCTGCAAACGTCCTTTGGTGTGATTTATTA[T/A]GAAATTTTCAGATAAAACTTGTTTGCTTCT
>A01_1185806
TACTAATTCCTTTTCCAACTTGATTTTCTA[T/C]TCAGAACCTCGACATGTTGAAGACGTGTAA
>A01_1186399
AATGCACATGGTTGTATGTCTCTTGTATCA[A/G]TTCCTTTTGGTTTCGAGAGACTTCCTAGGT
>A01_1186460
ATTACACATTCAGCAATTGCTTTGCTCTTT[A/C]TGCACAAGAGGTCAGAGAATTTGTAGCTAA
>A01_1186493
CACAAGAGGTCAGAGAATTTGTAGCTAACG[G/C]TCTGGCTAATATAGAACGCATCGCGAGAGA
>A01_1188243
TCCGGAGCGTGGAGTCCTAGTTTCCTCGAT[C/T]GTATCCCCTTTGCCGAGCTTTATACTGGAG
>A01_1188883
TTCGAAATCTTGCCATACTATGATGTACAT[C/T]ACGCAACCATGTGTTGACTATCTTCACTTT
>A01_1189015
TTTTAACTCTGCTTTAGACAGGCCATGGCC[G/T]TGTACTATTATCTATGGCAGATGATGTTCG
>A01_1189047
GTACTATTATCTATGGCAGATGATGTTCGA[C/G]TTTGACACTAGCATGTTCCAGTTAATATTG
>A01_1189224
TCGCACTGTTTATTCAGAACTTTCAGTTAA[A/G]GAACTATAAACGAGATAGAAATCAAAACTG
>A01_1189544
CTGGCGTGACCAATATGTTGATGGTTACCT[G/C]CTCCGTGGGGATGCTCAACAGGGTTCATAG
>A01_1190450
GAGAGGCAGAACATTTCCGACAACGAGAGT[C/G]GCCTTCTTACCGCAGTACAAGAACTGTCCC
>A01_1190672
CCTGAACTTGGCGGGGCCCTTGCGGTGGTG[A/G]GTGTGGGACTTGAAGACGGAGCCTGCTCCC
>A01_1191479
TTCTGGTCGTGTTTTGTTTTTTAACTGTTT[C/T]TTTGTTGTATTTCTAATAAGTGAGATAGTG
>A01_1192051
AACTAATGTCTCTTCTTTGTCCTACTTAGC[C/A]TCTCTAGAGAACCAGGTTAGCCTTTTATAT
>A01_1192128
AGCTCTCTATCTTTATTTTATAAATCTTTA[C/T]TGAAGTGTTTTTGTGTTGTGTCAGGAGAAG
>A01_1194919
GGAACTTAGTTCCCTAATAATCAACATAGT[C/T]GGTAGTTCTCTATAAAGCACCTAGTTACCG
>A01_1206364
TTCATTCAAGGCTTGAAGCTGCGCTTCTTT[A/C]TTGTCAAGAAGAGCGGTTAGCTTCACGTTC
>A01_1206631
TGCTTCGATAGTTTGGAACTGCCTCTCCGA[T/C]GAAAGAAGTGTTTCCACAACATTGGTGGAA
>A01_1206832
TTTATTCTCATGTACAATCTGTTTCATCTC[T/C]TCTAACCTCAATGACATATTCTCGATTTGA
>A01_1207419
AGAAAATAAAGAAAATCAAATGGGGCTCAT[G/A]ATAATGTGTTGAGTAAGTAAGTCTCCTATT
>A01_1207523
TAATTAAAAAATATATAATTAGCTTCACAA[G/A]ATAAATCTTCTAATCTAAGACAAGTACAAC
>A01_1207945
TGAACCAGTTTAAGACCAAACATGTCTGAA[A/T]GTTTTGTGTTCGGGAAATTGGAATAACAAT
>A01_1208550
TTTCCCTGTTATGTCTAATTTTGTTTTTTT[C/A]TTTATTACAGAACATTCTTGTAATACCACA
>A01_1209241
AGCGGGAAACCCACCAGGGATCCTTCAACA[C/A]GGAGCTGTTGATCCAATACCATTACTTTTC
>A01_1209984
GGTCAACGCAAGCATCGCGAGTCGAGTAGA[G/A]GTTATCATCATTCCGAGAGTCGAGAGCGGT
>A01_1210180
TTGTAATACGAACTTAATTATTTATTTTAC[C/A]AAATAATAGAATAAAGGATAACTCATAAAC
>A01_1210255
AATGTAACAACTTCTAAAATGCACTAGCAG[G/A]TTTTATATTCTAGATTTAAAATGGAGAAGG
>A01_1211020
AAACAAAAAATCGACAATATATAAATATAA[G/A]CGATCTAAAGTAGATATGGTTTTAACATGG
>A01_1211141
TTGAACATCCTTAATTTAGACCATAAAATC[C/T]AAGAAATAACTGAACCAAATATTCTCTGAA
>A01_1211514
TTTCTGCACTAATCAAATTTGATTTATATG[G/T]ATTATTATTATATATATAAAAAACTGGACC
>A01_1211624
CCATCAATTTCGTTTTCACTGTAACGCTCG[C/T]GTTCTTAAAAGCTTCTCTCTTCTACAAGGG
>A01_1211891
CAAAACGCACCGTTTCGCTCCTCTTTGCTT[T/A]AGCCATGAGTCCGATTCAGAATTTCGAGCA
>A01_1211961
TCGTCTCGTCGAGCCTGACCTTCGTAAACA[C/T]CTCTCTCACTCTCTCCTCTCAGTTTAATAA
>A01_1212106
GGTCAGAGACAGCCTAGAGATCACACACAC[A/G]GCTGATTACTCGAGTTTTCTCAAATGCTAC
>A01_1214350
CCCGTTAATGTTATAGTTTGAGATATCTTG[A/C]ATTAGCTATCCCGATTGTCAATTCTTTTAA
>A01_1214385
GCTATCCCGATTGTCAATTCTTTTAATTCG[C/T]TGATGTGTTACTTAGTCTTGTTTTCTGCTT
>A01_1214858
GGTGATGGGTATTGAATCCTGACATTTCAC[C/G]TTGGTGGATCAGTTATTATACATTTCTACA
>A01_1215073
GGTATTGCATGTCAGATTGTTTAGTGTAGG[G/C]AATAATATTTTATGGCTGATAAACCTCTAG
>A01_1215499
TTTGGTGCTGTTTCTAAAGCACCATCTGAT[A/T]TTGAACGAATATTGCAACCTCAAGTGCCTG
>A01_1216191
TATTATGCAGAAAACCCCGACCACAGAAGT[G/C]AACTACAGAAAGCAAGCTTTGAAATTCCTC
>A01_1216317
ACAATTATCAGTTTTGTTACTTTCCTCTGC[C/T]GAGTCATCTTGGCGCAGGAGTGAATCAACA
>A01_1216419
TAGCTTGTCGTTATACTAAGTAGCTGTCTG[G/A]TCGTATGTTAAAGTTGCTACTAAGTTGGCT
>A01_1216732
GTTAGGGGTTAAAACAAAGACACAGTTTAT[C/A]GCTGAGAAGTCAATTTTCAAGATGCTATTG
>A01_1216763
GCTGAGAAGTCAATTTTCAAGATGCTATTG[A/G]TCACTATAATTTCTGCTAGTTCTGATCCAG
>A01_1216820
CCAGATCTCAGGGATGCAGATGATGACTTT[G/A]TTGTAAACATATGTCGGCATTTTGCAATTA
>A01_1216864
TCGGCATTTTGCAATTATTTTGCATGGGGA[T/C]TGTACCTCGTCGTATGCTTCAACTAGTACT
>A01_1217108
TTCCTTGCTCGTGTCAAACATGCTGATGTG[C/G]TGGTGGCCAGGGGTGGTCACAGTGCCTCTA
>A01_1217348
TTATGCCTTTTCCAAGTAAAAATTGTACGC[G/A]GTCTGTTCTACGTTCAAAAGAGACTTCCGG
>A01_1217431
AGAGACAACTCAGGTTCTTATGCAAATTCT[A/T]AGAGTGGTTAATAATGTTGACGAAGCAAAC
>A01_1217584
TGTTCAGAACTGTCTTGCACTTTTGGCTAG[T/C]CGGACTGGTAGTGAGGTATCTGAACTGCTT
>A01_1217691
TTCGATCGAGGACAATTGATCAACAGGTAG[T/C]CTGCTATTTTTTGGTGGTTGTATCTCTTTT
>A01_1217794
AGTGTGACAGCTCTGAATTTTTGTTTAGCA[T/C]TGAGGCCCCCCCTTCTAAAATTGACTCCAG
>A01_1218014
GAACTCCAAGTCACAATGAACTACGTGCAA[A/C]GATAATTTCCATGTTTTTCAAGTCGTTAAC
>A01_1218783
AAGCGAACCAAAATATTTCCGAAGGTAAAA[G/A]TAAGATTGATTTTTACATTGCATGGTAGGT
>A01_1219213
GGAAATCACATGGAAGGACAGCTCGTCTGC[A/T]GAATGAGCAAGAGCTGAATTTAGTTCAGGT
>A01_1219248
GAGCAAGAGCTGAATTTAGTTCAGGTATCT[T/A]TTTCTGACTTTATAATTTATGCAATAGCTT
>A01_1219718
TTTTGAGGGAGTTTTACATAATTGAGGTAT[A/C]TTTCTCCATAATTTTTAGTTACAAGTTTGT
>A01_1219871
GCACTTGTTTTGCATTTTTTAAACCTTTTT[C/T]ATTCTAAAAAACTCGGCAATGATCATCTAG
>A01_1220147
TCTTATTGTAGATTTTCTGATTTAGATTTC[A/T]CTAGGGTTTTTGTTGTTAATCACATCTCAA
>A01_1220294
TGAGCTGGTTCATCATCGAAAAGAGCTTAT[A/C]AAGTTTGGATGGAATCATCTCAAACGGGAA
>A01_1220415
GCTCCGGAGAAAATCATTCTGCAGGTATCA[G/A]TTCAGGTTTTACTGCAATTTTTTTTTATTG
>A01_1220502
CTGAAAGTAACTTCTTATATCAGTGTATAT[A/G]ATTTGATCCATAATAAACCTGAAAGTAAGC
>A01_1220904
AGGTTTACCATCTAACACTACAGCAGAAAA[C/T]AGGCGGCTCGCAATCGATCTTGCTGGACTG
>A01_1222921
CTCGTCTGTTTCTTTGGAGGAGTGGGATAA[T/G]GCGTATCTTCAGCTTTTATATGGACTTTGT
>A01_1223507
GCTTGCAAATTATTTTGAAAAATTGCTCAG[T/A]CTTTGTGGTTCTTTCTTATGCCATGTTAAA
>A01_1224980
CTTTAACCTTTTTATAATTTGAGCAGAGTT[C/T]ATTCAGTTGCATAATTCTATAGAAGAACCT
>A01_1226328
CGGCAAAGGATATCATGGAAACTCTTAGGA[G/A]TAAACATACCAACTTGGCCAGTGAACTTGA
>A01_1227023
CCTCGTCGTGTTTACGTTCTCTAGAGTGGA[C/A]GTAAATTAATTATACAAGTTTCGTCCGTTC
>A01_1227088
TATTTCCTTCCCCTATGCGCTGTGAATGAA[A/G]CTAATGATATGTTTAACGGCTCAGGAAGTA
>A01_1227731
GGCTACAGGCTTATGGTGAAATCACAAAGA[T/A]CATAGTCAGTGACAGTATATTCTCTCACTA
>A01_1227975
CCCCAATGGGATGCTCGAGCTCAATGAGCC[C/A]GTGCCTTTCCGCCTCACAAGGAACATTCAG
>A01_1228185
GCAAAAAGAACATATTCGATATCAGTTAGC[T/C]ATGTTCTTCCGCGATGAGCTTCTGTCTTGG
>A01_1228411
GACAACTCCACCTCTTAGTTTTTTATGCTA[T/C]TAGCATTCTCATAAAACTCGTAAAGAGGGG
>A01_1228459
TCGTAAAGAGGGGTTTGTCGATTTTCTGAA[A/C]AGATGAATCTGATGATATATTTCCTGATTT
>A01_1228635
ATCCTTGGTTCTAACTTTGCTTTGGAGGAA[A/G]TATTTAACCATTTTAGGGTAGGATTTGAGT
>A01_1230221
GGGTAAAGTCAGCGTCTTTAAGCTGTGAAG[T/C]TGCTTTGCCTGTTGCTGCTGAAGAAGGCTT
>A01_1230336
AGCTGAAGGTCTTGAGGAGTGTGAGAAAGA[T/A]GAGCTTCTTAGGGTTGATCAAGAGGGGCGT
>A01_1230412
CATGGACATTTTGGTATTTACTCTTAACTT[G/T]ATGTTTAGTTTCTTTTAGGTGGAAGTCGGA
>A01_1230625
ATTTAGCAGTGAGGTACCTCTAACTTTGTT[T/G]TTTTATTGTAGAGAAGGTGGGAGTGTCTTC
>A01_1231893
GACTGTTTCCAGCAAAGTAGACGATGAACC[G/T]ACTACTACTTCATCACAGGAACAAGATCAA
>A01_1231929
TACTTCATCACAGGAACAAGATCAAAGCGG[G/T]TCTCCTGCTAAGCAGAAAAACGATGCAGCA
>A01_1232073
GGTTGTAAAGAAACCAGGTCCCACATTTGG[A/T]CGCAGATTCTACGTCTGCTCTCGAGCTGAG
>A01_1232596
TAATTCACATGATGGATACGTATACGTATG[A/T]GTTGTGGAATGATATTTTATTAAATGGACG
>A01_1232735
TATTCGATTTTTGATTATACAAGTAAAAAT[G/A]TATGTTGCTTGCCTTTTGAAGACGTCAAAA
>A01_1233774
TGTGTGGTCTGAGGCAATCCTTAAATACGT[T/A]GTAGTAGAGACTAGAGACTTTTCATATACT
>A01_1234001
ATTTTTTTGGTTTACAAAAAAAAAATATTT[T/A]CAGCCACAGCACAATTTGGCCACTGAATAA
>A01_1234272
TCGCACCTTCCCCTATAAATAAATCTCTCC[A/G]TTTCTTTCCCTCTCTCAAACCAACGCAGAG
>A01_1234415
TCCTCTCCTCTTCTCCGCCTCTCTCCCCCG[T/C]ATCTCCTCCCTCTCGCACGGCTCGGATCTC
>A01_1234450
CCTCCCTCTCGCACGGCTCGGATCTCGCCT[A/C]CTCTCGTCTCCGCCTCTTGCTCCTACACCT
>A01_1234659
AGACGTGGCGGGAACCGATCGGACGACGTC[G/A]GCTGATGAGTTCATGAAGATCCACGCGGCG
>A01_1234708
ATCCACGCGGCGTACTGTACGCTTTCTGAT[C/T]CTGAGAAACGATCTGTCTACGATCGGAGGA
>A01_1234812
GGGCAGTTACGTCGGCCGGAACTGGGAAAC[C/A]GATCAGTGCTGGTAGTGAGTTGACTCGGTG
>A01_1236735
TGGTTTTAAGTTATAAGAGCAATTCCAATA[G/A]GAGTTTTTCGACACAAGATTCTAAAAATAT
>A01_1237984
GAAACCTAGCGGTGAACGTGGAGGAGGACG[T/G]GGTGGTGGTGGTTGTTACGAGTGTGGTGAT
>A01_1238611
TTGTTTTTTTTTTGATGCGCTATATGACTT[C/T]GGTTGATTTTGCTTATGTCACTTTTGAGTT
>A01_1238920
TGTTTATAGAGTTCTGGATCAAAATTTGAT[G/T]ATTCTCATGTTTCACAAAACGAGAACCATC
>A01_1239506
TGAATACTAAAATTGAGAAAGACACGAAAT[A/C]TCAAACATCATTTTTTTGTCATCTTGTAAT
>A01_1239576
TATTAATTAACAGTGACACAGCACAATTTG[A/G]GTGGCTAGTAGATAGATACTCGTAAGACCG
>A01_1240024
ACAGCCATATGCAACCCATATTGGCATATA[T/A]TGCACGACCCATATAAAAAAAATTACAAAC
>A01_1240560
CTACACCGTGTGGCCTGGCCTTCTCTCCGG[A/C]GCAGGAACCGCTCCTTTACCCACCACCGGA
>A01_1240809
GTTCACCTTAAACGGAGCCGGCGGTCTCGA[T/C]TTCTACGACGTCAGCCTCGTCGACGGTTAC
>A01_1246697
AGAGTTTGGGAGAAGGAGGAATGGGAATTG[T/A]GTAGCAAACGCATGCTTCCCGAGAATCTTC
>A01_1247016
GTTATCGCTTCCCCTCCTCCGCCGGCAAAT[T/A]TTTTTATTACAGAACTAATCAGCAAACAAG
>A01_1247353
TATTTAATCCTCTCTCTTTACATAAAAATC[G/C]GAGCTTTAGGGTTGTTAGATTGCAAAGTTC
>A01_1247776
GCCCCCAATGATAATGTTTATGCATGCTCT[A/T]ATGTATTTGTGTGACTCTGACTAATAAATG
>A01_1247927
TAGCATTGGTAAAGCTTTTTTCTGTTTAGC[T/C]CTTTTGAGCATCTGTAGAAACTTCATCATT
>A01_1248141
TGAAGAACACATCCTCGTCCTGACATATGA[C/T]ATACGCATTATCATTATACATTTTACTATG
>A01_1248194
TTACTATGTTGATGAAACTAAAAAAAAGTC[G/A]TCAGTGTAATTGTACTGAACCTTTGCATAC
>A01_1248224
GTCAGTGTAATTGTACTGAACCTTTGCATA[C/G]AGCTTCACATAAGGTTCGAACTTGGGGTCA
>A01_1248633
ACCCATACGAGAGAAGAGAGTTCTTAGATG[T/C]GAGGCACCTTGATTCGGATCAGGAAGATCT
>A01_1249068
GACTGCTTTCTCGAGACCTTTGTTATGGGG[G/A]CGGTTAAGCTCGTCCTTGAACCTGATAGAA
>A01_1249098
GCGGTTAAGCTCGTCCTTGAACCTGATAGA[A/T]CCATTGGGACCTCCACTTTTCTTATTGGCA
>A01_1249305
GAGAGCTCGGAGGTCCCTACGAGTCTTCTC[T/A]ATCTCTTTGAGGTACTCTGCATCCACATTC
>A01_1249395
AAATCAACAAGGAAGAATAGAATTAAAAGA[C/A]TGACTATGAACGAGGAACAAGATTGATCAG
>A01_1250531
TAACTTTAGTGCCAATGTGGTTGTTAACGG[A/T]GCCACGGTCAATCTTGGTTTGTGGGATACT
>A01_1250595
GGTAAATATGAATGATGACCACCCATTTCA[G/T]CATCGAGCTTTTTGTAGTTGCAGCAGCTAT
>A01_1250943
ACCTACATGTATATGCCTATCTTCTTAAGT[C/T]GCTCTGATTTATATGGCATGCGTGTATGTG
>A01_1250996
TGTATGTGACTACACATTTTCTTGGTTCTG[G/C]TTCAAATTTGTACAAATGTTCAAGATGGAT
>A01_1252553
AATTTCCTCTCTTTGCCTACTTTCGTTCTG[A/G]CAATTTGGTCTTTTATTTTCTCTTCATGTG
>A01_1253828
AGCTCTATTTATAGCCAATGGGAAAAAAAA[A/G]GAAAAGGAAAGACCCTACATGGGCCAAAAA
>A01_1253886
AAAGCCTTGTTTGGCAACGCGGGAGAGTCA[G/A]AGAGCGTCGTCGTATGATTGGTTTATAGAC
>A01_1254013
CCATAAGAGTGTATGTGTAAGCCCATAGAT[A/G]GCAGAGGCCTTTTAAGAAAATAAGTTAATT
>A01_1255148
TACAAATACTTTTTGTTAAGTAAGAGTAAT[C/T]ATTTTATCATGTGAATGGAAATTTTAGCTG
>A01_1255395
TATAAATTAGTTGGTCTTACTTCCTCTGAA[T/A]CTCTTGTTCAAAACATTTCCGTAACCTTAA
>A01_1255975
TCTCTTGTAGTGATAGGTTATATACATACA[C/T]CCAACATAGGTTTATACATATTAAAATAAA
>A01_1256766
ATGTAATTAAGGTAAGTCTAGTCTACACAT[G/T]GTTCTGTCTTAAAAAATCAACACGTCAATA
>A01_1258331
TTACCAGTTCAGGAAAGCTCAGGACGAGAT[T/C]GATCGGTTTCTCAAGATTATACCTCTCATC
>A01_1259721
AGAGCATCACTGCACCATGAAGAGTGGCAT[G/A]CCGACTTACTAGCTTGTTGCTCGGAACCTT
>A01_1260085
TAATTTCGCCCTCCCAGCTTCAGCTGAAGC[A/G]TGTAATGAGCTAATGGCATATTCTTTGATA
>A01_1260342
GAAACACTTCATCTCAAGAGCTTCAAATCC[A/G]CATTTGTCACATACTTGAGGTTTTCTGATT
>A01_1264087
GACTTGTGTATCAAATAACTGAAAACTTCC[G/T]TCAAATATTAAACAATAAGACATCAAAAGG
>A01_1264507
TTTGCTTCTTAATCATATTCTTTAGCTTTC[G/A]CTTTACGTTCAAGATTCAGTGTTTTAGACT
>A01_1265362
GAGGTTAGTGACCAAGAACATAACCAACCC[T/C]ACCATGTTCTCTCTTGGACCAACCAATAAA
>A01_1265671
CCTTTGCTTCTTTTGAGAACCAAATGGGTT[A/C]AACATTAAATATAACAGGTAATGTTTTCAA
>A01_1265777
ACAAGTTGTTAGTACAGAAGTGAAAAGAGT[T/C]TAAATAAGAAAATGACAGAACAAGGAGGAG
>A01_1265829
AAGGAGGAGAGAGGCCCAGGACAGGTGTTC[A/C]TGTGCCTTAGGAAATGGAAAGATCCTTTAC
>A01_1265984
AAAAAAAGTACAAACTTTTTCCATTTTTTC[C/A]CTTCTTCATGAAAGCCTCTCTCAATCACCA
>A01_1266161
CACACACACACATAGAGAACTTAAGTATCA[G/A]CATTGGACAAAAACGTGTGTAAAACAAAGA
>A01_1266247
TATTTCCTTTTAAGGATTTGAACTAATTAT[G/A]TGAGGGCAAGAACTTCTCTCTGCTTGTTTA
>A01_1266305
TTACCTGCTCTTGTTGTCTCCTGAGTCTTG[C/A]ATTTTCTGCCTGCAGGTGAGCAACTTCAAT
>A01_1266569
TCTGTTCCCTGAACCTTCATTGGACTCTTG[A/G]CCTCTTTTCTTACCAAAACAAGTAAAATCC
>A01_1272376
CCTTTTGGATCAATTTCAAGTGTCACGTTT[A/G]TATATTTATAATCGTTTGCTTATTAATTAT
>A01_1272575
TTATCATATATTTTTTTTTTTTGGTAATCC[C/T]TTTTTTATCATATTTACCACAAGTTGATAG
>A01_1272787
AGCTGTTTATGAAGAAATTAACTAAAACAT[C/A]TTTTTTTTTTAAATGGCATTCTACTTAATG
>A01_1272978
AAGCGAAAACAAATCATATGTGCCACTGAG[T/C]TGATTGAATACGTTTCAAATTCTAAAACAA
>A01_1273194
GTAAAAATTTACATTGAAAATATACAATGA[T/C]ATTTTCTAAAACAAAATAAAAAAATAAAAA
>A01_1273627
GTAGCGTTTATGGGTTTATTACATACTTCA[A/G]CATATTATATTTTAAAATGTAAATTTTTGG
>A01_1273698
GATAAAACACCAAATGGGAGATATGTTTTT[G/T]TTAACATCAAGATTTTGATAAGCCCTTTCT
>A01_1274000
TGCTCTGTCCCAAACTCCATCAAATCTCTT[T/C]AGTTTTTTTTAATCCATCTATTCTAGCTAA
>A01_1274073
ATCTCTTTAGTTTGCTTTAACAGTAATTGG[C/T]GTAGATGCACCCAAAAACTCATGTAATTTG
>A01_1274116
AAAAACTCATGTAATTTGCCATATAACCTT[A/T]TTTTTAAAAATATTTTTAGTGACTATAATA
>A01_1274212
ATTCTAATCTCTTTATCTCTCGTACAAATT[C/T]TTCAAATCATCTTCTAATTCAGCACAAATC
>A01_1274970
TATTCATCTTAAATACTATTGATGGAACAT[G/A]TATAATTAATAAAAACATAAATGCATTTCG
>A01_1275314
AGATAAAAGAGGTTGATAGACTCAAAATAA[G/A]TCAGGACAAGTGAATTGATGTGATGATATA
>A01_1275375
AACTCGTATTTATCGATTTTCGTTTATACA[T/C]TGAATTTAGAATCCAACGAACAATACGACT
>A01_1275534
GTAGTCGTAATAATTTACTTCTAAAATTAG[C/T]AATAAAATAAATAAGCGAAAAACGTGGAGT
>A01_1276434
TGGCAGAGAAACACGTGCTTTCTTCAATAT[G/T]CACATCAAAGCAATACAAAGCAAACGACAA
>A01_1277032
ACTCCGAGCAGGACAAAATAATATATTTCA[T/C]GTCCAACACTAACCAACAGCTCCAAACATG
>A01_1277513
CCATATTTTCAGCTTCAAACAGTTAAAATG[T/C]ATGTTATACCAAAGTATTATAAGCTTTTTC
>A01_1278301
TATGTGTCTCTAATCAAATTCTCTTCACTG[C/T]AACAAAAAGAAACATTTGCATCTAAATTAC
>A01_1279258
AATCCAATAGGAAGATATTAAACAGATGCT[G/T]ATGTTACATGACGATACATTGCAGTAAGAA
>A01_1279763
TCCGATCTAACGTCTCCAGCAACCGGAGCA[A/T]GTGGAGCAGTGGATGCAGAAGGAACCGGAT
>A01_1281217
TTAAGAAGATTACTACTACAAACTCTATAA[A/T]AGTGGAAATAATATGAACAAAAATCTGAAG
>A01_1281394
CCCGGCTGCCATTGCCGGAGCCACCGCCTC[C/T]GTTTTGTTTGCTCCGGTAAGAGTTGTCTTT
>A01_1282190
CAAATAAGTAAACGATGTGCCAGTGTCAAA[C/G]AGAGCTGTAAACTCATCATCTATTAGAGTT
>A01_1282274
CGTGATGTTATAGTTTGGACTGCAATTAAA[A/T]TTTTACCAAGGTTACTTACATTCTTGGCAA
>A01_1282403
CTGATCAGAACTACCTTTATCCCCAAAACT[G/A]ATCCTCCCAACTCCATCATGTCCAAAACAC
>A01_1282442
AACTCCATCATGTCCAAAACACATTGAGAA[C/A]GAATCAGCAACCAGACCTTCCCTCGCCAAC
>A01_1282472
CGAATCAGCAACCAGACCTTCCCTCGCCAA[C/T]ACACTCGGAACCGATATCTTCTCCATACCA
>A01_1283094
CCCCGGAGTTCCCAATTTCACCGTCGTGTA[G/A]TGCAAACTTAACATCAAAACATGGAAACAA
>A01_1283321
ACAGAGAATCTCTCGAACTTACAATCCGAG[G/T]GAGCTGATGCGAGAAGTGGAGTTGCCGTCG
>A01_1283354
GCTGATGCGAGAAGTGGAGTTGCCGTCGGA[G/A]AAAGTGAGAGCGGACGACTCCGATTCGGAA
>A01_1285489
ACGATTCGATATCTTTTGCTTTCGTTCGTC[T/C]AGTTAGGTTATTAATTGTCGTAATCAATAG
>A01_1285807
TTTGGAATTTATCACTTCTATATTTGTGGC[C/T]AAACTGTTAAGCTTAGAATATCAGGCAGAT
>A01_1285907
TATGATATTGGCGATGCTCTCTTTCAGTGG[A/G]ATGTTAAGCAAAACAATTGGTTTTTGGAAT
>A01_1289721
AAGAAGCGAAGAAACGCCGACTAACCAGAG[T/C]TCGAACCAGAGATCGATTCCTCCCTGTACG
>A01_1291217
ACGTAATGAGTGCGTTAGCTAAAACTGACA[A/T]TGTAATTAATGACGTGTTTGGTGAGTAATT
>A01_1291429
ATATTGCGAAAAAAAAGAAAAATCAAACCA[T/C]ATTCAAAAGTTTGGTGAGACCAACACACAA
>A01_1291822
GTTCCCAAATAAGAGATTAGGACCAAAACA[T/C]ACCTGAAGACAGACAGAACAAGAGTCTTTG
>A01_1292817
AAAGAAAGAAAGAAAGAAAGAAAAAAAAAC[T/A]GAGGAGATGAGCTTATTCAAGAGAGATGAG
>A01_1293113
AATATTTAACTTATAATTTATATATTCGGA[T/C]ATTACCTTTTTGTAATACTCTTACAAAACG
>A01_1293183
TCCCTCTGATTTGTGGTATAAATAGTTTTT[A/T]AAATCTTTTTTTGTTTGTTTTAAAATATAA
>A01_1293573
TTGCTAAAACTAGATATATTGTTTTTAGTC[T/C]TTTGCGTTTTATTTATTTATTATGAATTTT
>A01_1294585
TTCAAAATTGTTGTATAACAATCTCGAATA[G/C]CCAAATTTAGGTCACCATTTATTAAGTTAC
>A01_1294794
TTTTTTTTTTTGATAAATGTCCTATAAATA[C/T]ATACTCCACCGTTTCCTATAGTTGACGAAA
>A01_1298910
AGTCTTGCAGTGGCTTGCAAAAGTACTTGA[G/A]TCAGCTCGGGTTCAGTATAGTTGGTTATGG
>A01_1300335
AAGCAACTTGGTGGGAATGGGAATCATACC[G/T]TTGTGCTTCAAGACAGGAGAGGATGCTGAG
>A01_1300960
GAAAAACAATATATTCTAAGACAAGGAAAA[G/T]ATGACTGGTTTCTTGTTTCTTTTCAACTGA
>A01_1301022
CAAGAGGTTTACTCCATTGAGGTAGCATGT[G/T]TGAGATCATGAAAACCTTCAAATGGAGACG
>A01_1301207
TACTTGAACTCCTGAAAGTGAAACAATTTA[T/G]TTGCTGCCCACTTGTTTCCTTTGATTACTG
>A01_1301241
CTGCCCACTTGTTTCCTTTGATTACTGGAC[T/G]ACCAGCTGAATCAATCAAATGTTTAAATCT
>A01_1301342
AGAAACGCATGAAGAAAGGCAATTGTGTTT[A/G]TCTCTCACCATGCAAACTAGAAGGGTCTTG
>A01_1301683
TCTTCCCAATCCATCAAAGTGAGGGTCAAA[T/C]TTCTGCCCAACTTCATAATGGATAACTCGA
>A01_1301760
CTGCATTTATTAACTTTAAACCAAGACAAT[G/C]TAAAGAGTAGCAACAATATAACCTTAGAAA
>A01_1302071
GCATTACTCACTATTGACCTCACCATATTA[G/C]GTTTTGCGAGGCTAATCAAGTGCTCACATT
>A01_1302245
AAATTAAATTAAATTAGAGAGAATAGCAAA[A/C]GGTTCTCACTGCAGGAATTTTTAAAATCTG
>A01_1303189
AGGTAAAAACATCAGAAATTTCCTATGATG[A/G]TCATTTTTAATTTATTTTCACAAAAAGAGT
>A01_1303367
AAATTAAAAATTTTGAAATAACAATTAAAA[A/T]TTTTAAAATACTTTTTTTTAAATAGTTTTA
>A01_1304348
GAACAGTAGCAACTCGTTGCCCTCCCCTTT[A/T]GACGTTTTAACTCGTCTTTGAAATAGTCAT
>A01_1304505
GTAGACTACCAACAAGACCAGTCCTAAGCA[C/T]AGGCAAGTTAAACATTGGTAAGCCCCAGAG
>A01_1305143
TGGACGACCAGCTGAATCAATCAAACTCAT[C/T]AAACCAAGTCAACAAGGATAATAATACTAT
>A01_1305245
CTCACAATGAAAACTCGAAGGGTCTTGAGA[A/C]CCGTCAGGCCTATTGTTCCAGAAGAGTACA
>A01_1305298
AGAGTACAGCGTCTCCCTTCTTTGGTGAAA[C/T]AGATAGTCCTCCACTGGAGTTAGGGAAGTC
>A01_1305381
TCCGACCTAATAATTATCATTAAAAAATTA[G/A]AAGATTACTGACTTACTCATTAGATAATAT
>A01_1305457
GATCATGAGACATATAGATTATTATATATA[T/A]AAAGGGGTTGTATGTGTATGGTTTTAACAT
>A01_1306159
TTTCTTTACATAAAATTTATAGAAATGTAG[C/T]ATTAGATCAAACCCTAAACCTTTCAAGTTC
>A01_1306227
TCATCCAAAAAGATGAACCCGAAGATTACG[T/C]TATTACATTCTTTCTCATGATAAAAAGAGT
>A01_1306769
AGACATGGTGAATTCGCAAGAGAATCGAAT[C/T]AGGGTATGAACTCGTACATGAAGCGCGAAC
>A01_1308639
AAACAATAAAACAATCTAAGAAAATGCAAA[A/C]GATCCATCACTAAGGCGAGGTTAAGAGCTT
>A01_1308707
CTTTTTTTACTCAATTACTGTACTCGTGAG[C/T]GTGAAGCCATTTAGTTGATGACCACTTGTT
>A01_1308823
TGGTTTTAAATCTCTACTAATTTAAGTTCA[C/T]AGAAAGACAAGCTATCTCTCTCTCTCTGAC
>A01_1309426
CCTAGTGTCCTCAAACTCTCTTAACCAACC[T/C]TGACTAACAACTTTTTTTAGTTCAGTCCAA
>A01_1310301
GTGCTTCGGTTTCTTCACCATTCTTGATTG[G/T]ATTGTTTGTTTTTGTCTACAAGTTTTCAAG
>A01_1310751
ACCTTTTGTTCTAAAAAAATATTATAATTA[A/C]CCTACTTATTGTAGTGTTAAAGAATATGGA
>A01_1310783
CTACTTATTGTAGTGTTAAAGAATATGGAC[T/C]AAGTCCAGCAACACTTTTAGTTTGAGAAAC
>A01_1310824
ACACTTTTAGTTTGAGAAACCAATTATGAT[A/G]TGTAGAGCTTGATTGTTCTTTTGAGAAATC
>A01_1312041
TAAGCCAATGTATCACGTCGGTTTTATGAA[G/A]ACGGTGTTGAGTATCATGCGTTGCGTTTGC
>A01_1312242
CCCCAAGAATAGACTTAAGAAGATTCTGGA[C/A]GCGTGCAAAAACAAGACTAAATGTGCTGAT
>A01_1312413
GGTTGCAGAGTATAAAAATACGAGGAAGAA[A/G]AACGATGAGAAGGACCAGCTTCCAGAGCCT
>A01_1312811
ACAGGAAAAGAATGGAGCACCAGCTCATAT[C/T]ATATCAGAGTTTACACAGCTCTTGCAGTTC
>A01_1314696
CTGTTAGGTCTTGAATAAAGCTCGTGACGA[T/C]GCTGGAAGCAGTGCTCAAAAGAGTTTAGCG
>A01_1314726
TGCTGGAAGCAGTGCTCAAAAGAGTTTAGC[G/A]GAAACCAACAACCTCAAGGCCATGGTGACA
>A01_1314975
AGAGTTTTTTTTCCACGCAATGGGAGGAAG[G/A]GAAGGTCTTATCGATACCGCTGTGAAAACA
>A01_1315383
TGCTACAAACGGTGATAGCACTTGGCCGTT[G/A]CCTGTTAACATCAAGAGACATATCTGGAAT
>A01_1315622
TCGCTAGTAAAAGAGTTTTGGAGGAGTACA[A/G]GCTCAGCCGCGAGGCTTTTGAGTGGGTTAT
>A01_1315660
CGCGAGGCTTTTGAGTGGGTTATTGGTGAG[A/G]TAGAATCAAGATTTGTGCAGTCGCTGGTAG
>A01_1315713
GCTGGTAGCCCCCGGGGAGATGATTGGTTG[T/C]GTTGCTGCTCAGTCTATTGGAGAGCCTGCT
>A01_1315773
TACGCAGATGACTCTGAACACTTTCCATTA[T/C]GCTGGTGTCAGTGCGAAGAATGTTACCCTC
>A01_1315860
TAACGTTGCTAAACGGATCAAGACACCTTC[C/T]CTATCTGTCTACCTCACACCGGAAGCTAGC
>A01_1315896
TGTCTACCTCACACCGGAAGCTAGCAGATC[G/A]AAGGAAGGTGCCAAGACTGTTCAATGTGCT
>A01_1315971
TCTCAGGAGTGTCACTCAAGCTACTGAGGT[C/T]TGGTATGATCCAGATCCGATGAGTACTATA
>A01_1316165
TGGCGGATATTGCTGAGAAGATCAACCTTG[T/A]GTTTGATGATGACCTGACTTGCATATTCAA
>A01_1316316
TGATGTGTTCCTTAAAAAGATTGAGAGCAA[C/T]ATGCTGACGGAGATGGCGCTCAGGGGTATT
>A01_1316508
AGATGTGGATCCAAAGAGGACAACAAGCAA[C/T]CACTTGATTGAGATTATGGAAGTTCTAGGA
>A01_1316556
GGAAGTTCTAGGAATCGAGGCGGTTCGTCG[T/C]GCTTTGCTGGATGAGCTTAGAGTTGTGATA
>A01_1316610
TGTGATATCCTTTGATGGCTCCTATGTGAA[C/T]TACCGTCATCTTGCCATCTTGTGTGATACG
>A01_1316682
CGGTCATCTGATGGCGATCACTCGACATGG[G/A]ATCAACAGAAACGACACTGGCCCTCTGATG
>A01_1316877
GTATTTGAATGATGAGATGCTGAAGAATGC[A/T]ATTGAGCTTCAGCTCCCTAGCTATATGGAT
>A01_1317343
TACAGTCCCACCTCGCCCACATACAGTCCC[G/A]CTTCGCCCTACTACAGTCCCAGTTCTCCTG
>A01_1318313
CGTAACGTCTAAACCTTTTGGAATCATTGG[G/C]TTTAAAACTCGTACTAGCTCACAATCTGAG
>A01_1318750
GACTGGATTTTCCAATGTGAATTAAAAAAA[A/T]AAATATCAAAAACTTTATCCGCAGATGCTA
>A01_1319004
ACTTAGAGGAATGTAGAAAGATCTTGGCAC[G/A]ACATTCTAAAATCGGTGGATCTTCTGAACT
>A01_1319237
ATCACCTAAAAATAACAAATACTATTTATT[T/A]ATAATAATTAATCAAAAAAAGAAAATTCAA
>A01_1319276
TAATCAAAAAAAGAAAATTCAAATTCATCT[C/G]TGTGTTTCCGCAGCAGCAACAACAAACCGA
>A01_1319622
CCCTCAAGCGACTCTCGCTCGCACGCGCGT[T/C]CTGAAAAACTCTCAGGATCCTCTCTGGGAC
>A01_1320090
GGAGGATATTTGTTACGCCGTCTCCGAGGC[T/G]CACCATATGATTTACATCGTTGGATGGTCG
>A01_1320196
CCGAGAGGTGGTGATTTGACGCTTGGGGAG[C/T]TGCTGAAGTATAAATCTGAAGAAGGTGTTC
>A01_1320285
GACTTCTCATGATAAGTTCGGGATTAGCAC[G/A]GTGAGTGTTAGAGATTATGTGACGACGTAA
>A01_1320998
AGGCAACCGTGGCACGATTTGCACTGTAGG[T/C]TAGATGGCCCTGCGGCATATGATGTTCTCA
>A01_1321213
CTCAATTGTTCCGGAGGACGATCCAGTTGT[T/C]TATGTTTCCAAAGAAGATGATCCTGAGAAT
>A01_1321555
TAAAAGCATCCAGACAGCATACATCCAGAC[T/A]ATCAGATCTGCTCAGCATTTCATATATATC
>A01_1321603
TTTCATATATATCGAGAATCAGTATTTCCT[G/T]GGTTCTTCTTATGCTTGGCTTAATTATAAA
>A01_1321763
TCTGGGATGGATTCTCCTTCTCCTGTGTAT[T/A]CAAAAGTGAATGAAGTGAATGTTCCCTCTC
>A01_1321866
GGCACTAAAGATTGTTAGTAAAATCAGAGC[C/T]AAAGAAAGATTTGCTGTATATGTCGTTATA
>A01_1321932
GTGGCCTGAAGGCGACCCGAAGTCTGGACC[C/T]GTGCAAGAAATTCTGTATTGGCAGGTATCA
>A01_1322089
GAGCCAAACTATGCAGATGATGTATGATGT[T/C]ATAGTACGAGAACTGAAAGCAGTGCAGTCA
>A01_1322278
GAGAAGAGGAATCATATATATACACTTTCC[C/A]GTAGTAATCAGTGGAACAAATTACTTATGA
>A01_1322453
TAATATCAACCAAAGATCAATGGCCGGCAC[G/A]AAAGATACAGAGATAGCAATGGGTGCATAT
>A01_1322837
AGGAAACTGGAAAAAGTTCACAAATATTGA[A/G]TTCTCAGAGCTGCAAGGTCACTTGATTAAA
>A01_1323388
AACGTGAGTCTTGCCACATGCAATTACTAC[T/A]AATGTAATATAAAAAATTTAAGAATAATAA
>A01_1323751
TTAAGGATTTGAATCTGATGAATAGACTTG[C/T]GAGTGTTGACCTGTTTAAAGATTCTCTGTA
>A01_1324039
ATCCGTGCCGAGGGCTAGGTCTAGGTCTAG[G/A]TCTAGATCTTTGCCAAGGCCTATATCTCCA
>A01_1324449
GTCTTGCTTTCTTGTAATGGAGCCGCGCAC[T/C]CGTGAGTCTCGTGGTTTTGCCTTTGTTACT
>A01_1324527
CGCTGACCGTTGCATCAAGTATCTCAACCA[G/A]TCTGTTCTAGAAGGCCGTTACATCACTGTC
>A01_1324866
AGGTTTATGTGCTTTGTGTTATCTTCAGTC[C/T]CGAAGAAAGCGCCCCCGAACTCCCACCCCT
>A01_1325261
AAGGTCCGAGAGAAGGTATTAACCCCGTCC[G/A]TGGTGGCTCGAGATGACCTGTGTGTGTAGC
>A01_1325791
ACGCCTCTCATTCACCATCGCTAAACATCC[C/T]CTATTCTTTTCCACTGATGATTCTCTGCAA
>A01_1326743
ACAATGCTAGGAAACCTTTCTTTTTTTTAC[A/G]TGCAAGGAAACATTTGACAGTTATGATGTA
>A01_1326940
GATGAGACAACGGCTTATCTCTTCCTTACA[C/T]GTGATCATCCTTTGATTATAATGATAGCTT
>A01_1327003
TCTCACTGACCGGTAGTATTTTTTTCTTAG[A/G]GTATATTAGCAATGGATTTCTGTTAATTAG
>A01_1327071
ATTCTGTGTAGATTCGTTAATTCTTCGACA[C/A]ATGATTTTGCGTTAATTTGTATATGGGAGA
>A01_1327103
TGATTTTGCGTTAATTTGTATATGGGAGAA[G/A]TAATGTGATAAAGAAAACTGAAGATCAAAT
>A01_1327374
GAACTGGTGGAAGAGAATAAAGTACCTGGA[A/G]GAGAAAAAAAATCAGTGAACAATCATTGAT
>A01_1327541
ATTTTGTGATTCTTAATTACCGAACCGAGA[G/T]ATGGATATGGTTATAGGATTCATTCACATT
>A01_1328303
CTTGAGAAGTACTGGCAACAAGATCCAGTT[T/C]AAAGGCCCAATTTTGGAGAAATCTTAGAAA
>A01_1328348
GGAGAAATCTTAGAAATGCTTATGCAACTA[C/T]TCCATGAGCTATCATTCTCTCCGCTCAAGT
>A01_1328384
GAGCTATCATTCTCTCCGCTCAAGTAAAAC[A/C]ATTACCAAAGCGAGTCTGACAACTATAAGC
>A01_1328799
CGTTCTCTCCAGATTGTATGCATCATGGTG[G/A]CCTATTCTCATCTTGCTTTGTGTAGTTTTT
>A01_1329239
TTACAGCAGTGAGAAGTTCAGTTGAAGCCA[T/A]GAGAGATCTTTCCCCGCTCTCACAACCCTA
>A01_1329296
CCTACAATATTTCATTTATAATATGAGTTT[C/G]TGTTCATAACTATTACTAGACATTTTGCTA
>A01_1329450
TTTTTTTTAGGCTTTGTTGTTAATTTCAAC[C/T]TTTTTTTTATATAGAGGAAACCAAAGGTCG
>A01_1329634
CTCACGCGCAACTCTCACCGGTACTGATGT[C/A]GGAACTCTAGCTGCTTCCGCTGCAACATTT
>A01_1329692
TTTGCTCTGCCTGTTGTTACTTTCCTCCTT[A/C]AAAAAAATAAAACAATTTAATAAATTAAGT
>A01_1330512
CAAATGCTCGTCATCTGAGTCGGATGATGG[T/C]GTAGATTCGGTATCTATTAACAGTTCGACA
>A01_1330542
TGTAGATTCGGTATCTATTAACAGTTCGAC[A/G]TACAGCTGGTTCACCGGACTCGGCGGTATC
>A01_1330974
ATTGGGTTTGTTATGTATGGCTTAGTAACA[G/A]CTTTGAGTACACAGCTTGGGGAAGGGAATT
>A01_1332118
TTAGGTGAATGCTCTTTTATTGATACCGAT[A/G]GTTATAGGATGCTCTGTGCCAGTGCAAGTG
>A01_1332299
CGAGAACCTGCATTCATCTAGTCATGTCTT[G/C]ATGTAAGAGTATACACATGAATGTAAATCG
>A01_1334406
GCTCGAGATCTTCAAGATCCATGGCAGAGA[C/T]AAACGCGGCCGTAAGATCCTTCGTATCATC
>A01_1335208
GATGGTGGTGCTTCTCGCGGCCAGTGAGCG[T/C]TTTTTACGGGAAAAAAAAAAAATAGAAAAG
>A01_1335379
AAATTTGTAGATCTTTTCTTTAGTGGTGGT[G/C]GTCGTTGTGAGTTGTCGAAAATCTTGTGTA
>A01_1335464
AACATTAGTTGTAAAAACAAAAATATGTCA[G/A]TGTCACAAGTTATTTTATTAAGTGCTATAA
>A01_1335508
TTTATTAAGTGCTATAAAATATCTCTAACA[G/A]CAACATTCTCATAGTAAAAACGAGGATTGA
>A01_1335603
TACCACCATCATCAAGCTTGAATAACATTG[A/G]TTTTATCTTCTTCATCTGTAAAATAGCTAG
>A01_1336204
ATATATATATAATTTGATGTTTGATTTAAT[G/A]TTTTTGAAAACATAAATAATAAGTTATCAT
>A01_1336395
AAGGAATCAAGTCCAGAATATCAAAATTCT[G/A]TTTTCGATTTCTCTATTTTTAACTTCAGTT
>A01_1336452
AGTTTCCGACAAAATCACAACAAAAGCGAA[C/T]AGTGTTATTGAGTACAACAAAAAAGTAATG
>A01_1336748
GTGCTCTGTCTGGCGGGAGGGAAGAAGCAC[G/C]TCTCTGTAAAGGTCCTTCTTCCGGCTCTGT
>A01_1337775
CGAGCACCTTGGCGCAGCAAATATCAAACT[A/C]GCAATGCCTTCCTTCAGATCCACAGGACAT
>A01_1339088
GATTTTAGGAAATTATGTGTAATTGATTTG[G/A]CTTATATGCGATAATTTATGTGATTTTATA
>A01_1339695
TTATAAAAAGAAGTAAAATTTCGTTTTACA[A/G]AATTATGTCAAAATTAGTATAGCAACCAGA
>A01_1339933
GAATGCCAACGAGGTCTACATACTTTAAAT[T/G]CTTCTAATGAGAGATTATGTTGAGAAGCGA
>A01_1340128
ATCTCTCCAACTCGTTCGTGGCATCCTCAA[T/G]ATTACACTTCTTCTTCTTTAGTACAAAAGC
>A01_1341146
CTTTCGAGTTATTCAAATAAACAATGGTCA[T/C]CAAATCGTCTCGGTAGGTAGCGAGATCCAG
>A01_1341283
GATTGCCTAATGCATGGCGTCTTGCATTAC[A/C]ACACGTGTAAGAGGAGCATATGATTTGAAT
>A01_1341906
TGGTATACTACAATAGGATCACATATCCAA[T/C]CAATTCTTTATTTTATTTTTTTAATTTACA
>A01_1342412
TGTGGACAAGGAAGAATAATGTTTGCATGC[G/A]AACACACATGCAGAAACTTAAATTAAGCAA
>A01_1342456
AAACTTAAATTAAGCAAGAAAATAGAAAAT[G/T]CAAATGTTTTAGGCCACGCAGAGCCTTCAC
>A01_1343454
AAATTATATGAAATGGTAAGCCATATATAA[C/A]TTGGTTTCTTCAGTCGAAATGAACCGGAAA
>A01_1344089
ATAATTTAGAATTTAATGAGAGATTATGTT[A/G]AGAAGCGAGGCTCGTGTTCTTATCAACCTT
>A01_1344122
AAGCGAGGCTCGTGTTCTTATCAACCTTCG[A/G]AATAAACCTTCTAGATACTTCTCGAATCCG
>A01_1344152
AAATAAACCTTCTAGATACTTCTCGAATCC[G/A]TCAATGCTCATCTCGACCTCTTCAAGCCTC
>A01_1344562
CATCGAGTTGATCAGTTCCTCCTCCGGCTA[C/T]TTTCTTGCGTCTGACACACGACTGAACACC
>A01_1344599
GCGTCTGACACACGACTGAACACCACGAAC[A/T]TGTTCGTGAGTCTCCACCATGAGGTCTCTA
>A01_1344701
CATCTCCTCCATAAACTCTGATCCATCCGA[G/C]GACATAACACGCTGAGTCGAACCCATTTTA
>A01_1344776
ACAATTATAGAGCTCCTCCAAACCAGCCAA[C/T]GCCGTCAAGATTGATTCTGAAGAACCCGCC
>A01_1345472
TGATTTCACACACTTTTTCTTGTAATCTGA[G/T]TGACTAACGTGTATATTTATTAGAAACGAA
>A01_1346276
TAAAGTAGAGTTGTGTGTTTCAGAAAATGC[T/C]ATTCTACAAACAATTAAGCTGTGATGATTG
>A01_1347727
AAACCCTCCATGAATAATTATTTAAGAGAA[C/T]ACTATATTTTGGTTGAGATGCTCTATAGGT
>A01_1347776
TGCTCTATAGGTTCTTGACCGTTACTATAT[A/T]TAGTGGAGAAGCTCAAGAACAGAGGAATTC
>A01_1348777
TATAAAATCGATATTTTCTAGGGAAACGGA[T/G]ACAACAAAAGTTCCAAACATCTTTGACATT
>A01_1348925
CTACGAAAATATTGAATTTTTTGGTAAATG[C/T]TCTATATACTGAAGTCTATGATCTTTAGTG
>A01_1349009
TTCAACATTTGTACTAATGTATATTACACT[A/C]TCTTTCATGGTACATGAACATCGTTTTAAT
>A01_1349225
AATAGTATTTTCAATTTTTTAATTTTTTCT[C/T]AAAATCTATGTGTTAACCCCCTACGAAAAT
>A01_1349648
TAAATTGGTGGACTAACCACTATAAAATCG[T/C]TATTTTCTAGAGAAACGAAGACAACAAACG
>A01_1350377
TTTCTAGAGAAACGGAGACAACAAAAATTT[C/T]AAACCTATTTAATCTTCATCATATATTAGT
>A01_1350659
TCATTTTATTTTTTTGTCATGTAATTTAGT[T/A]AAACTTCATAATACTCCCTAAATTGGTGGA
>A01_1350858
AATCTATGTGTAAGCCTACGAAAATATTGA[A/C]TTTTTCGGTAAATGCTCTATATACTGAAAC
>A01_1351757
TTACGAAAATATTGAATTTTTCGGTAAATG[T/C]TCTATATACTGAAGCCTATGATCTTTAGTG
>A01_1351815
GTGTTGTTTTAAAATTTCTAAATCATTCTA[A/C]ATTTGTATTAATGTATATTAAATTATCTTT
>A01_1351846
ATTTGTATTAATGTATATTAAATTATCTTT[C/T]ATGGTATATGAGCATCATTTTAATTTTTTG
>A01_1351916
TTAGTAAAACTTCAGAATACTTCATAAATT[G/A]ATGGATTAACCACTATGAAATCGTTATTTT
>A01_1352155
TTGTAAATAATATGATGATACATCCATATC[A/C]AACGTGATTTATACACCTGTAAATAATAAG
>A01_1352748
TGTTGCGGCGGAGTTGGTCATCGCTGCGGC[A/G]GAGGAAGCGGTTATGAAAGAGAAGAGCGAT
>A01_1352925
AGAGTTCACTAATCTGCCAAGAGGACCACC[C/G]GTTTGTAACGTCTGTGGAAGAGCATTTCAC
>A01_1353220
GGGATTGTTATGGATGTGGATCGAGTGGAG[G/A]AAGAGAAGCAGGAAGTGACTGAATCTGGAA
>A01_1353578
ATTTTCTCAAAATTCAATCAACGAGCTCTT[T/C]TCAAAACGACCAACTTCCACAGCCGAACCT
>A01_1354144
TTCGAGTACGTCAACTACTTCCTTCATGTG[G/T]GGCCGGTTTTTCGGATCTGGCTCAATGCAA
>A01_1354738
CGTTAGGAAAAAAACAAACCAATAAAGATT[T/C]TACTAGTTGTTAATTATTACCATCATATAA
>A01_1354930
CTTAGGTCCCAAGGAAAAGGCTCGCTTCCT[G/A]AATCAAATAAGGATCATAGAATGTAAATAA
>A01_1354983
GTAAATAAAATATACTTTAGAATCAATTTT[C/T]GTGACAACCATGCTTGGTGTGTTGTGGGTC
>A01_1355287
TAATGTTACATATGAATAATACCTTTTTGG[G/A]TCAAAATACATGAATAATAGTATAATACTA
>A01_1355367
ATAATACTTTGATTATATAAACCTAGCTAC[G/A]TGTCCCCAACTCAAATGTCCAGTAGCAATG
>A01_1356059
ATAACTCATAACCCCACCGGAGCTCTCGCT[T/A]ACCGCCTCCGAGAATTGTCCGACGCTAGTG
>A01_1356101
GAATTGTCCGACGCTAGTGTTTGTCGTCGC[T/G]GCGGTGGTGGACGTTGACGAGGAGAACCCT
>A01_1357578
TTCTTAAATACGACATTTTCCTTGTTAAAG[T/C]CAATTTTTTATGCATTCCCTTTGAATTAAA
>A01_1357827
CGATTACAACAAGGCTGAATAATAAACATG[G/A]ACTTTATATTCTGGAGTCAAGTTTTCGTTA
>A01_1358556
GAGAATTTCAGCAAAGACATGTTTTCGTTT[C/T]TTGGCATAAACATAGTCGGTGGAACACTCA
>A01_1358614
TCATGCACACTTGAAGTGGTTGCGAACCTC[A/T]TTGTACGGTACACGTTAACCAATTGTCGTT
>A01_1359228
GCAATGCTTGTTTAAGCCATTTCAAGTATT[A/C]GACTGACGTTGAGAGAGAGAGGGAGAAGAC
>A01_1359268
TGAGAGAGAGAGGGAGAAGACCTGAAGATC[A/G]TGGATGAGACTGTCGAGAGATTTGATCTTC
>A01_1359331
ATGAGGCCACCGAGGAATCCCAAACTCTCT[G/A]CATTTCTTTTTCAAGACCGTGAGACCGACA
>A01_1359520
ATTACAATACACTTTAAAACTAGCCTAGAG[C/T]TAACACTTTTAAAGAAATAAAAAATCGGTA
>A01_1359967
AATTATACTAACGAGTGATTTATTGAGTTA[A/T]GGAAAGAAATTAAATCTAGACTCCACAAAT
>A01_1360541
TATTAAGATAGTTGGATCACACATATTTAC[G/C]ATTGATGTAACCGCACTAAATTATACAAAA
>A01_1360628
AACAAAATCAAATGCTGAGAGAAGCTTATA[G/A]AGAGGAGGCGTTACCTTGAAGGGCATAGAA
>A01_1361204
GGTTCAAAGGCGAGTTTTGTATAAAATGAC[T/C]TTTGTTCACCACAAAAATTCCCGGAAAAGC
>A01_1361483
TTTCTCACAACCATAATAAGTGTTAGTGTA[A/T]ATGAAGACAATTAGGAAAAGACGCCGATGA
>A01_1361992
AGAGAAACCAAAAAGCAAATCCAAATCTCC[A/G]AGAGCTCCAATGATAGTGTCTTATTTTCCC
>A01_1362076
GTGAGAGAAGGCCAGAAGATGAAGTGTGTG[G/A]GATGTTGACATATTTGTTGTGAAGGCTTTC
>A01_1362621
TAAAAAGCTCAACAAAACGTTAACAATTAG[A/G]AAAATACACAGCCTCTCGAACTTTTCCAAA
>A01_1362716
CTGTCCCTCAAGATTAGGCGCATGTTTTTC[G/T]CCTTTGCAATCTCTCTATTTTCCATTTCAC
>A01_1362838
TGCAAAGATAGTTTGACGGCGAGTAGAGAG[G/T]ACAATTTCAAAAGCGGCTAAATGATGGAAC
>A01_1363034
CCATTCCTAACGTGTCACTTAGCTGTAGAG[A/C]ATTTTTTAATCTTATATACATTAGATTTAG
>A01_1363168
AATATGTGTCTTTCAAAACGCTTTTGTTTT[G/C]TAATACCCATAATAACAACTTGATAGGATT
>A01_1364308
TTCGAAAGATAGTGCGAATAGAATATTTTA[T/C]AAAAATATCTTACATTTTTGTAAGATATTT
>A01_1364359
TAAGATATTTTCTATTAGGAAGTAACTTCA[C/T]AATTATTAATATTTTAATGTAAATAGTGAA
>A01_1364459
TTTACCATTTTTGTAAGATATTTTCTATTA[G/C]GAAGTAACTTCACAATTATTAATATTTTAA
>A01_1364565
ATAAAAAAATAAACAATTACTTCATCTATT[A/T]TATTGATGTCTTGGAGTAAATTACAAAGAT
>A01_1364605
CTTGGAGTAAATTACAAAGATTAAAATTCA[C/T]TTTTTCTTAAATACACTTCTAAAAATATTA
>A01_1364692
AAGAACATATATAATCTAATTAGTTAAACA[G/T]ATTTTAATAAAGGTAAAATTAACATAAAAA
>A01_1364921
CGAAATCAAGATTATTATTACCAAACACAA[G/C]TACAGCTGTAATCTAGACAACAGTTGAATA
>A01_1365122
GGTAAAAGCTCCCTCCCTCGCTCTCGTCTG[A/C]GTTCACTCTTCCGATTCCTCACGTTTTCTC
>A01_1365245
GAAAGGTATATATTCTCCTTTTAATCACTC[T/A]CACACACATGGCGAATGAATCTGAGATTCA
>A01_1365340
AAAGAAAGCTGGAAAGAAAGCAGCCAAGGA[T/C]CCTAACAAGCCTAAGAGGCCTCCAAGTGCC
>A01_1365949
ACAAGTCCAAGTCCGAAGTCAACGATGAGG[C/T]AGAAGGTGCAAGTGAAGAGGTTTGTACTTC
>A01_1366208
TTTATGTTAACTGGGATGTATTCGTAATCT[T/C]CTTCAACTTCTCATGACAACTTTGAATTTA
>A01_1367054
AGTGGATTTAATTAATCTCTTGCATTAAGA[A/T]CATAAATTACAATAAGATGAATAAATACAA
>A01_1367121
ACATGATAGCGAAGTAAGCATAAAATAAGG[T/G]TAGAAGACTAGAGAAGCTATAGGTACACCA
>A01_1367517
AAAATAGTTTTATCTATATTTTTTACATAT[G/T]CGCCCACACAACATACACTCGTAATAGACA
>A01_1367825
CAACTTTTTTATTTAAAACATAAATCCACA[C/T]AATAACATGAATTAGTACCAGAGAAATCAT
>A01_1368092
TAAACGTTCTGTTACTATTAATCAGAGATC[T/A]ATTTAACTGGATTTTTGTTTTTGTTTTATA
>A01_1368245
TCTAAGGTTTAGACAACACGTGGAGTCTGT[G/T]GCTCCTTAACTTAAAAGTCCTGATGGCTGG
>A01_1368296
TGATGGCTGGCCCACCAGCTCTTTGCATTT[C/T]TATAGTATGTTTTTTCTTAATTTTGAACTA
>A01_1368469
GCTAACCGGTCAGCAAACGAGTAAATTAAA[G/A]GGTTGTTTATTTCTGTTCTTTTTTTTTTTG
>A01_1368855
TTTTATCCACACACTCTTATTGTGAAAAAA[C/T]CACGTTACCGTTGCTTGAAAATTCTGATCG
>A01_1369426
TTATTTTTCAGAATTTTGGTTTGGTTTGAT[T/A]GATTCTTCTGTTTGGTGAAATGGGCACTTG
>A01_1369483
CTTGTAAATTCTCTACCTTTATAACACTTA[G/T]CAGTTCAAATCTGATGCTTGTACCTAAGAT
>A01_1369678
TTGGAGAAATGGGCAATTGAAAATTCTCAA[C/A]CTTTATAACATTTACTAGCCTAATTAGCAG
>A01_1369746
TCTGATGCTTGTGCTTAGAGATTCATAAAG[G/C]TTATTTTTATTTACTTAAACTTTACCAACT
>A01_1370178
TCTTCGTGTTCTTCCTGATGGAAACAATGG[T/C]ATTGGGACAACAAGTACTACTAGTCCTAGG
>A01_1370265
TGAGATGAGCTCTGATCTCCACTTGCTTGG[A/T]GTCCTATCAAACCCAAGTAAGTTAGAAAAG
>A01_1370462
GAAAACTTCTAATGGATCAGAGAGATCAAA[G/C]AAATGGATTTCTTAGTCAGTCTTAAAGCAG
>A01_1370516
AAAGCAGTTTTAGACTTTTTTTATTATATA[A/T]TTTTTATGGAATGTTAAACTCTCCTAGAGA
>A01_1370836
ACAGCTCTCTTCCACTAACTTTATCATCAT[C/G]ATCACAAGGATCTTGCACCGCACCAATCCT
>A01_1371635
CTTACACATACTCCCAAGCTGATGCAAATC[G/A]CACCCAACGACATTCACAATCTCATCCATC
>A01_1371797
CCCGATCATGCGCTTAACCTCTTCGGATTT[C/T]TCGCCAAGCTGCAACCTTTCTGTGATGTCG
>A01_1371845
TTCTGTGATGTCGTCGATTAAGTTACCGGC[G/T]TCGAAGATCTTCTTGTCTTTGTAAGCGAGG
>A01_1371929
CACGCGGATGTAGGTGCCTTGGGGTCCGCT[A/T]ATGCCGCCGAGCTGGGCCTCGTAGTTGTCG
>A01_1372876
GTCATTTTGGGGGTCTCTATGTACTCTTTT[A/C]TTGAAAAGGTAAATGATACGTTTGGGAGAT
>A01_1372935
ATAGTTGTTATTTTAGTTTAGTGGATGTTA[G/T]TGCATAGCATGAGGAATGCATAGCGTCTTG
>A01_1373069
CAATGTGATAATACATGACTAGTTTTGTAT[A/G]AAACCATGTTTGTTAGTTTGCGTTACTTTA
>A01_1373104
CATGTTTGTTAGTTTGCGTTACTTTAGAAA[T/G]ATTGTTTTGTTGATGTTCTATCTGTATTTC
>A01_1373356
TTTTTTTTCTTACTTGAGTGTTCAGAATCT[G/A]TTATAATCATGCCAACCTTCGGGATTCAAA
>A01_1373637
ACAGTCTCGAGGTTTATCCCTATTGACAAG[G/A]TTTTGAAGCCTGTGCTTGTGGAATGTGTCA
>A01_1373744
AGAACAGCTTACATTGGTGTTTAAGGTAAT[G/C]CAAACAGTTTGTTCAAATACATTGTGAGAG
>A01_1374981
GGCAATTCAAAACCGGAAAGGAAAAACAGA[A/G]GTAATTGGCTTTCTTCATCTGTCACTCTGT
>A01_1375031
TGTCACTCTGTTTTTTTCTTCTTTATATGT[G/A]TTTGGTTTGATGTATGATTCTTGTTGTTTC
>A01_1375509
AACCGACGACGTCCACACCCACCTCGACGA[C/T]TTATTAGCTTCCCGTTTCAACAATCAGTCA
>A01_1375855
CTTAGGCTGCATCGAGCTGTAGACAATAGG[T/A]ACCCTAATGGTCAAATTAACAAGAAGCAGA
>A01_1375996
GAGGGATTAGAATCAAACCGGGAGGCGTTC[G/A]AACCGGATGAAGTGGATTCAATACCGACAC
>A01_1376272
AAAACACACATTGTTGTTTCTTTTTTTTTT[T/G]ATGTGTTTTGAATTTATGTTTTTAGAGAAT
>A01_1376351
GATGGAGAAGAAATGTAATAACGTGATGCA[C/G]TTTTTGTTAAATGTTATTTTTACTTTTGAT
>A01_1376433
TTAATTAACAAATACTGTAGTTAATAAGAA[A/G]TGGGTCGCGTTGCACTTAAAAATTAATAAT
>A01_1376463
ATGGGTCGCGTTGCACTTAAAAATTAATAA[T/A]GAGAAGTGGGCTAACTTTTGAAAATAGTGG
>A01_1376495
AGAAGTGGGCTAACTTTTGAAAATAGTGGG[G/A]AAGATTAAGAAAAATTTACATAGAAGAGGG
>A01_1377375
TAAAACAGTAAAATAATAAAACATTGGATA[G/A]AAATATTACAATGAGTAAAATGTTATTACT
>A01_1378657
AGGAATATATGGTTCCTATATAAGTAGATT[C/T]CGATTTGTGGTTATACTTAATGAGTTTTGT
>A01_1378923
AAATTATTATCATCTATATCATGATTTTAC[A/G]ATTCAAAATATTTATTTGAACCTAAATATA
>A01_1379329
CGCTAATTTTATACTGACTACAAGTAAATA[A/C]GCATATACACAATCCAAGTATTAATGAAAT
>A01_1379787
ATTAACCAATAACATAGCAAAGATGGTGTG[C/T]TTTTTACATATAGAGATAAAATGATGAGAT
>A01_1381582
GATTTCGTGAAGTGCGGCTTGTGCGAATTG[T/C]TGTGCACTCTTCTGAATCTTCAAAGCAACA
>A01_1382430
CTCTCCTCTTTTTGCTCTTTTCTTTGCTTC[A/T]GATTTTCCCGATTTAAACTTTTTGCGTAAT
>A01_1382587
GACCGTAGACCGGTTTGGCTCCCAAATTAT[T/G]AAGAACCGGTCCAAAGGCAATTTTGATCGA
>A01_1382958
GCTAAAACTTCGGTAATCAAGACCAAAGAG[G/C]CCCAATAAAATTAATCCATAAATCGGGAAA
>A01_1385646
GCTGTCAACAATTCCCTATTGTCCCAAACC[A/T]CAATCATTTGCCTTTTTGTTTCGAAGGGAT
>A01_1385835
CTTTTGATAAGGGCTTATTTGCCAAATAAT[A/C]AAAAAAAAAAGAGTAATTAAATTTTTAGTG
>A01_1386003
GGTTTCTTAATAACATACGGCAATTTGATT[A/C]TTTATTTCTTATTATAGTCAAGGGAATGAT
>A01_1386336
GTTATTTTATTTAATGATTTTGATAAATTC[C/T]CATTTAGTAAAATAACAAAAAAAAAATTAA
>A01_1386614
CTTTATGTATACTTCAGTCTCGCTTTAAAT[A/G]TTTTAGTAAAGTTGTAGAACTACGTTTTTC
>A01_1386789
TTACCAATTGGATCAGATTCTTCTTCCTCT[C/G]TGAACAACAACAACAACACAAACTTTTCTC
>A01_1386886
GACTCGCTCCTCTAGATTCCTCGGATCCGC[G/C]GCGGCGCCACCACCGCCGGAAGAAATCCTC
>A01_1386947
GCCGCGGAAACCGACATGATTGTGATCCTC[T/G]CAGCTCTTCTCTGCGCTCTCATATGCGTAG
>A01_1386982
TCTTCTCTGCGCTCTCATATGCGTAGCCGG[C/T]TTAGCCGCCGTAGCTCGCTGCGCCTGTCTC
>A01_1387021
CGTAGCTCGCTGCGCCTGTCTCCGTCGTCT[T/C]GTCGGCGTTAATTCCTCCGCCGTAGGAGAA
>A01_1387363
CCACCACGCTTCCACGGCGGAGAGTCAGAT[C/G]AAAGATCAGGCTCCTCCTCATCAACATCCT
>A01_1387442
ATTGTTCCTGCTTTTCTTCCTTAAAACTTT[T/A]TTTTTTACTTTTTTTATAATTTCGCGGTAA
>A01_1388098
ATTAGTTGAATTGTATAATATAGATAATTA[G/A]TGACATATTTTCAAAAAAAAAAATTCTTAA
>A01_1388175
TGAAAAACGAATGAAGTAATAAATTAGGAG[G/A]ATGATAATTGGCAAAAACTGGGAAATTATA
>A01_1391067
ATTATACTAACACCCAAGAGGCAAAAAAGT[G/A]AAGATAAAATTCGGCAAAAACTTTTTGATC
>A01_1391189
TCTCTCTTTTTGTTCGTATTTTCTTGTCTA[A/G]GACCGAACGTATTCTTATTCTTTGATAAAC
>A01_1392007
TGGTACTTTTCTTTTGTCATAGAATCTCTT[A/G]ATCATTTGTACTCGAAGCAACCCCCAATTT
>A01_1392264
TTCATTAGTTCACATGTATAATAACCCATA[C/T]GATAACACAAATAAAAGAAAGAAAGACCAT
>A01_1392329
CGTGAAGATTACAAACCGACAAACCAACCA[C/T]GTTCATAGAAGTTGCATTAAATACAAAAGG
>A01_1392389
GGCCTATTATTACTACACCAATTTTCTCTC[T/A]AGACAAAACCATGTTCATAGCAAGCTCACG
>A01_1392942
CAATGTGATTACGATCCAAGACCGAAGAAA[G/A]ATATTGTGGTTTTTTTTTTGAAATCAAATA
>A01_1393096
GAAAGACAATGTCTCGTGACGATTACACAT[C/T]GACAAAAAAAAAAATATGGACTGGCACACA
>A01_1393145
GACTGGCACACAAAGATGGTTTGATTCTGT[C/T]TTGGACCGGCTCTACAGTTCAGTCATAACT
>A01_1393209
AACCATGAAAAGCAAGAACAGATAATGTGG[T/A]GAGACATGAATGAAACAATGATGCGCACAA
>A01_1393545
TTGTTTTTTCTTGTTGGACTTGGAGAAGAA[A/G]CACATCTGCACCCAGCTCTTCTTCGGCTTA
>A01_1393709
GATTCTCCTGAGCACGAAACACACGCAGCT[C/T]CGTAAGCATCCTAAACGACTCCGGAAGCAC
>A01_1394046
GAGAGCCTTGAGCTTGTTGTAATCCGCGCG[G/T]AGCTCGGTAAGAGAAGAGCATCCACCGATG
>A01_1394122
TCGATATCGTTCGTCTCGACGTCGAGCTTC[T/C]TTAGGTTGGCTAGTGAGCCGATGGACTCGG
>A01_1394184
GAGGACCGGGAGGTTGTTGCAGCTCAAGTT[T/A]AGCTCCTCGAGCTGCAACAACCTGCTGAAA
>A01_1394214
TAGCTCCTCGAGCTGCAACAACCTGCTGAA[A/G]GAAGAAGGGAGAGACGATAGCTGGTTGCCG
>A01_1395425
AGAAGAAATGCAATCGGAAGCTCTTTGAAT[A/G]AAATCGTCGAAGAGAGAGTGAACGGTTTCC
>A01_1395629
TTGGTCTTCCTTCTCCACGTTCTGGATAAG[A/G]GAGGTAGCGGCTTCGACCTCGTCGAGACCT
>A01_1396368
GGGAATGATATGGGGATCATCAAAGATAAC[T/C]AAATAGGCCCATTCTGTCCGTATGAAGGAT
>A01_1396416
CCGTATGAAGGATAAGCATTAAATAACTCA[A/C]TGTACTCCATTATTGCTCTTCTTTTTGTAA
>A01_1398080
AAGCGTTGCGGTTAAACTATGCGAACATGA[T/C]GAAATCTTGGTCGGAATTATAACAACGCTA
>A01_1398235
ACATAGAAACGTGAAGAAAATCTAACGGCC[A/G]TAATCGACCCACGACCTTTTTTATCTTTTG
>A01_1398365
ATTCTTTTTTTTCTTTCAAACTAGCTGTCT[C/G]TCTGTTCGTTCTTTTAAAAATTATATATTG
>A01_1399730
TGTTTGTTTCTGAAAGCTATAAAGTAGAGA[G/A]ATTTAATTCAACTATTCGAGTCATAGTTTT
>A01_1399996
TCTAAACACCCTTCACACTTCACATCTCTC[T/G]CTGACATCACATAAAAATTTCAAAGCATCA
>A01_1400415
ACAAATAAAACACAGATAAATAAGATAAGG[G/A]AGTATACAAAAGCTTGTGAAATTGGTTCAA
>A01_1400448
TATACAAAAGCTTGTGAAATTGGTTCAAGT[G/C]ACAACACAAAGACAAATCCTTCAAAGACAG
>A01_1400584
CTGGTTGTTGAGCTTGGCCACATCGATGGG[C/T]GTCTTCTCGTCTAGGTTTTGCAGAGTCCTG
>A01_1400698
TGAAGTCGTTTTTCTATAAGTGTTGTGTTG[T/G]AAGGCTTACACTGCTGCACCATTCTCCAGG
>A01_1401147
AAGCAGACTAACCTCAACATCACCAAGACT[A/G]GCAGTTTGATGAACAATAGACTCTTCCTCT
>A01_1402198
GCGGATTTTTATCTGGATTTGAAGCCATTA[A/G]ATCAAACTTTAAACCCTATAACATATAAAG
>A01_1402938
CAGGTTGTTGAGGATGACGCCGGATTCGAT[C/G]AACCGCCGTCGCAGGAGCTCGCGATAGTCT
>A01_1403075
CTCGTGGGACGGGATCCCCGATCGCGGAGC[G/C]TCGTGGCTCAGAGACGCGCCGATCGGATCC
>A01_1403403
TCAGCTTCTGGAATCTCTTCTGGTTTGTTC[A/G]TGACGGATAATTATATACTTTATTTTATTT
>A01_1404827
TGGGATTCATCTCTCTATCCTCGAAGTGGC[T/A]TCTCCACAAGCTTATGGTCTGGTACTGTTC
>A01_1405302
CTTCGTTTCAGAAGCCATGCGAACAAGATT[C/T]GCCACAGTTATGATGAGCACTTCTCTGGAA
>A01_1405640
GTGGACTGTGACACCTGATATGGATCTTCT[T/C]GCTGCCCAAACAATCATGAACAAGCATGAA
>A01_1405823
TTTAATTTCTTCATGTGGAAGTTTTTCATA[A/T]CTTCTCCCATTTCACCAAGTCTTCGAGACT
>A01_1405889
TAACTTGAGCTGCCAAGTACTAACCACTGA[G/A]AGAAATTTTACTTGCAACTTTTTGAAAACA
>A01_1406052
ATATTTGTTCTGTGTATTTCTTCTTTTGCC[T/C]TGTGTAGATGTTGCCACTGGAAATGGTACT
>A01_1406363
CCATCTGTTGGTTGAAGCTCCGAATGTCCC[A/G]CTTAAGGTGCTGAGCAATCCAAGCAAGGAA
>A01_1406393
ACTTAAGGTGCTGAGCAATCCAAGCAAGGA[A/C]GGGTACTCAGAGAATCTTCTACTATTGTAC
>A01_1406884
AGGTTTCTCTTTCCATCTTTTGGTTGCCTT[G/A]AAAAGCTAGCCAAAGTGAGACTCAATTTAC
>A01_1407652
TGAATTTAAGGTCTGGTATGCTTTATCAAA[G/A]ACATTAGCCGAGCAAGCTGCATGGAAATTC
>A01_1407995
GCCCAAGGCAGATACATTTGCAGCTCTAAC[T/G]TTGTCAGTCTAGAGGAACTAGTTTCCTTTT
>A01_1408482
ACGTAACAATAATCAATAAGAGTCAAGACT[T/A]ATGGAGACTTTGTCGTTGCGAGAAAGTGTT
>A01_1408764
ATAAGAAAAACATATGGTTCTTGGATTCAG[T/A]TGATAGTTAGAACATCAAAATAATATAAAT
>A01_1408854
TACCAGTTTGATGTCGCAATGGATTGTGTG[C/T]ACTGTTAGCTTCTTTAAATCATCTGAGTTT
>A01_1409095
ATCCATGCATCAACAAAAAGTTTATGAAAG[A/C]AAATTAATCCAAGGCATTAGAGACAGGGCC
>A01_1409286
GCCAAAACGTATACCTGAAGAAGGTTTCCT[C/G]CAAAAGTAAGTTTCTCAACATGCTGTAGCT
>A01_1410002
TGTGTCACACCATACATGCCTCCATCGTTT[T/A]GACAAGAGCGACGTTGTGATGGCGTATTTG
>A01_1410050
GATGGCGTATTTGGTTGGAATAAAGGTGAG[G/A]ATATGTTGGAGAATCACATCAGGTAGACCG
>A01_1411121
GATGTAGCTAATGGAACCGGCCTCCTCTTT[A/T]GCAGCTTCCACCATTTGATCCTTCAACGAT
>A01_1411160
CACCATTTGATCCTTCAACGATCCAAAACA[G/T]ACATTTGTCAAGATAAAATCCTATATAATA
>A01_1411199
CAAGATAAAATCCTATATAATAAAACTAAT[C/T]TTTTCATGTCTCAATGTCTTTAAAAAAAAT
>A01_1411301
TGTTTTCTTGCTTGACTCTTGGATCTCACC[C/G]GCAATCAAAAGCTCATCCAATATGTAATAC
>A01_1411355
GTAATACGCCTTAAAAAAAATCAACAGAAA[A/G]TGTCAGCAAAAAAAAAAACTAAGTGTTGAA
>A01_1411781
TGTTCCCAATGTTTTAAGATTTTAAAAAGT[G/A]CGTAATAAAAGCTCAGTACTTTCAGACCTT
>A01_1412091
AAAAGGTAGCAACTTTGTATCTCTAAAGAA[T/G]CAATTAAACTACGATGCTTTCTCAGATCCA
>A01_1414435
GGAGTGGTTTCTCCCTTTGCTTCATCTGCT[T/C]CAGATCTGTTGAGTTCCATGTTATTATGGT
>A01_1414467
AGATCTGTTGAGTTCCATGTTATTATGGTC[G/A]GGTGGGGTTCTGGAATCTTCAGGTCTCTGT
>A01_1414902
CAAAAACACTATTCAAACACGGCTCTCTTC[G/T]ACATATTATATACTATAATATACGTAAAAT
>A01_1415088
AGAAAGAATTGATGGATTCTAATTTCTCAG[G/T]GAGACAAAAGAAAGAATCTGGAGAAGTAAA
>A01_1415288
CTGTAGATTTTTGTTCTGTAAAAGACAAAA[C/G]AAATGCGATGGTATACTGTTATGATGTTTC
>A01_1415464
GATTTGGATCCGAGCTTCTAGTTACTTTCG[G/A]TTCCAACCACTATGTATAACTCTTACATAT
>A01_1415517
TTACATATAAATCAAAGTACGCTTTAACAT[A/G]ATTAAAACCGATCATTTGATTTTTTTTCTT
>A01_1416366
AATGAGCTTTGTGCTAACTAGATAATATAG[C/T]TTTTTCCTTGATTCCGAAGCTCTAGATCTT
>A01_1416779
TGTATATTACAAATTTAACAACGGTAAAAG[G/A]AAAAAAAGCTAACCAACGACTACACTTATT
>A01_1416818
CTAACCAACGACTACACTTATTTGTCCACT[C/T]CACATGGACTATTGTACCTGATTGATCATT
>A01_1417170
ATGTTTACAAAATAGTTATATCTACATTGT[G/T]TTAAATTTTAAAAAATCCTTATTTCTTCAA
>A01_1417209
TAAAAAATCCTTATTTCTTCAAACAGTTGT[C/A]ATAAGTTTTGGGTCTTTAAATAGCATCATA
>A01_1417294
CAAATTATTTTGAAATTATCAGATGAATTT[C/G]TTTTAGTCTCTCATTGGTAAGTGGTAACTA
>A01_1417523
GTGGATTTCACATGATGAGCATTTGTTGTC[C/T]TCCTTTTTCTTGATTTAAATAGAACCTTTT
>A01_1417938
AGTTATAAAAACTCTCAGGAAATAGCCCAT[G/A]ATGACAGAAACTTCCAAAAAGTAATACATG
>A01_1418106
TACAACCAAAATATTAACCAAACAGAGTTA[A/G]ATCATGCATGTGTGAAAGGTAGATAAAGAA
>A01_1418784
TTGGACAGAGCATGCTCTCTTGAACTTCCT[T/A]CGAAGGACCGTGTCGGTGTTTAGCTGCTGA
>A01_1418841
CTGAGCGTGAGACGCGATGCACGAGAAAAT[A/G]TCTGCGAGGATGTCCACGTGTGATGCTGGC
>A01_1419118
AGACGTTTCAACATATTCAATATCATCCAT[G/A]GTTCTCAACACTTTCATAAAACCCGCGAAA
>A01_1420779
TGATTCATTTCAATATGAATAATAAAAAAA[A/T]TCACCGGATTCAATCAACTAGAATATAACA
>A01_1427626
TGAGCCACTGAGGAGTACTTGTGGAGCATA[T/G]TGGTTCCATTCGACCGCTTGAACCTGTTAA
>A01_1427657
TGGTTCCATTCGACCGCTTGAACCTGTTAA[T/C]CAAACACAACAGACCATGAGCATTGCCACT
>A01_1428115
AAGAGAAGAAAGGAATCTTCTGATTTCATT[C/T]TGAGAAAGATTCTGAGATCTCTCTCTCCCT
>A01_1428277
AGCGTGCACCATCCCTTATCGATTCCCTTC[C/T]GATAACCCCAGGAAGGCTACTCCCACTGAG
>A01_1437598
AGTGGGAAGCTCTGTGAAAGAGTGGTGGGA[G/A]TGGGGCTGGTCATGGATCCTCTCGAGAAAA
>A01_1438393
GCCGACATAGCATTTGTCGGTGGGAGTAAT[G/A]TATATCGTCGGTGGCAAATTGTTTATTTAT
>A01_1438601
TTTGCTTCAAAATCTGATTAAGTAGGCATC[G/C]GTTTAAAATTTTGTTTAGGTTACGAATGTG
>A01_1439290
GTTGATCTCATGAACAAGAACACACCTTTG[A/C]AGTCAACAGATTAAACACACACAAGGGAAA
>A01_1439323
TCAACAGATTAAACACACACAAGGGAAAAG[A/C]AACAACCTCTAGGCGTCTCTCATGCTAATG
>A01_1439558
TTGATCAACTTCTTTGATGATGTCTTCAAG[A/G]AAAACATCAGTCATACTATGTTCAACACAC
>A01_1439621
TTGTTGCAGCTCATCGATCGTAATGTAGCC[A/G]CTTCCATCTTTGTCAAAGTATTGAAAGGCA
>A01_1439717
ATGGATGGTCGCTGCAATGAACTCGCTGTA[G/A]TCTATTGTCCCACTGTTGTCCACATCAGCC
>A01_1440009
ATCACCTGATGATCCCAAAAAAACAAACAA[T/G]GTCAAGAGAAGTGTGATGCAAAGAACATAG
>A01_1441560
ATGGTGCATGATCTGAATCTCCCTTCTAAC[A/G]TCCTCAACGTCTTCTTTAGAGATCAGCTTC
>A01_1441686
CCCGAACTGGCCTTGTCCTAGCTTACGGCT[T/A]AGCGTGTAGAGGTCGCGGATGTTCGGGGTC
>A01_1442089
AACAGCAAAACCCAGTTCAGATCAACAAGA[C/G]AAGAACACAAGTAGTACTAAAAAGTCAAGT
>A01_1442292
GAAAAACTTGAGGGACGAAGGAAGGTGGAA[A/C]AAGAAGGGGAAAGCTACAATATTTAATGTT
>A01_1443225
AAAGATCGGGTCAAAACAAGAGTTGGCTTG[A/G]ATAAATGACATTAGCATATTCGTTTTTATT
>A01_1443317
GTTTACAACTAGGATATTAGCACTAAACAC[G/A]ATGTTTTTATTTATATGGTCAACACACTGA
>A01_1443389
GAAGTTTCGGTTTATCTAGGCGCCGCCGGT[T/C]CAAGCCAATACGGTTTAATTAGTGGTTAGA
>A01_1443570
ATTGCAATGAATAAAGAAACAAAAGCTAGT[A/G]AAGTATATATGTTTTAAAGAATAAAGAAAC
>A01_1444102
ATGTTGTAATCGTGTGATGTTTCTATCTCA[G/A]TTCTTTCTCTTTTCTCTCCTAAAATGCTAG
>A01_1445385
AGAGAGCACACATACGTGGTTCGAGAAGAC[G/A]GGAGCTAAGCGGCAGGTGTCGCTAATCCCA
>A01_1445473
CTTAAAGTAATATTTTTTTTAAATTAATCT[C/A]GAAATCTTAATTTAACCAAAAGGGAAAAGA
>A01_1446027
ACGCAACTATTGCAGGTGATTAATTTGATT[G/A]TCATGATTCTAAACCCTTAACTATGTGTAT
>A01_1447297
CGTAGGAGGGAATCAAACAAGGAACGAGGA[G/A]TGGGATGAAGAGAATCTTGTTGGAGAAGGT
>A01_1447961
CCGAATTTATCCAAAATTTTTAACAAAATT[T/A]AACGAAATCTAACCAAAATTAAAATTTTGG
>A01_1448081
GTAAGATTTATGTTAAACTAAACCAACCGA[A/T]AGCCAAACTACCCGAACTGAATAATCCTAG
>A01_1448160
ATATGTTTTTTCGGTTTAAGATAAATATAT[G/T]TTTGTCTGACTCCTCTTGGAACTGCAGTTC
>A01_1448382
GCTCATGGATCTCTCTGGTCGAAGGTGATT[T/A]AAAAAAACATAAATACTTCCTGTGTTATTT
>A01_1448576
CCACGCGGTCTTATCAACAGTAAGCGTTGT[T/C]CTCTACTTCTGTTTCTTCGTGATGGGTTTT
>A01_1448811
TGTTGCATCTCGTGGGCCTTTGTGTACCTT[G/A]AAGTCCCTGAAACTAAAGGTATGCCACTTG
>A01_1449798
TGAAACAAGCAATCCCACACAGGAGGAACA[A/G]CCCCCAGAAGCTACGGAGCTTAAGCTGTTC
>A01_1450501
TGTAAAAAAAATCTGTGCATGGACTCTAAT[T/A]GCTAGCTGCAGTTTCAGAAGCATGGGGAGT
>A01_1450915
GTTTTGGATAAACTGCCCTAAGAGTTTCAG[C/T]ATGAACTTACTGTGGGAGAAAAACATCGTT
>A01_1451119
ATGTTCAAGAATCCATATCACTGATCCAAC[G/A]ATGAGGAAAAAAGCTGCTGTAACAGCCCAC
>A01_1451236
AGGAGCAACCACCACAAGCCCTGATTCTAT[A/G]TATGGCTGAGTGAAATCCACAATCCTTGTC
>A01_1451333
TCAAACACCTGAAACCAAAAACAATGAAAA[T/G]AACTCAACATTGTCACAAGCCAAGTCTTTG
>A01_1451633
GCACACCGATCCTCAACCTCCTCCCGTTGT[C/T]AGGAAACACCCATCCACGCGGCGTAACAGA
>A01_1452107
AAACATTTAACCCAACAGTCCCATTGCTCA[G/A]CTTCTTCCACCGCGCTGCGAAGTCTCTCTT
>A01_1452150
CGCTGCGAAGTCTCTCTTCTTTCTCGACTC[T/A]GGAGTGTGGATGCGAAGCGTCAGTACTCCT
>A01_1452255
ATCCAACAGAGAAGTCATCCAAGTCGTGGC[G/A]ATCCACACATACCCTCTCCCCATCATCCCA
>A01_1452597
GCGCATCAGGAAGAGGTCGCTGGGGGCTGT[T/C]TGGACGAAGAAAGGGAACTGGAGAGGGGAG
>A01_1453156
CCTGAAACACCAAATTTAGTTAAAAAACAA[T/C]AATTAGACAAAACTCCCAGATACTTGGAAT
>A01_1453411
TCTTCAGGGACAGCGAAAAAATCTAGCTGA[G/A]AGAAAGGAATGAGAAACAGGGGAAGAACGA
>A01_1453744
GACCCTTTCTGTCCCCTAGCCAAATAAAAG[A/G]AGGAGAAAGAAGATGATGAGAATGTTAAAG
>A01_1455858
TTAGGTAGTGGAAATGCTATGCCTCGTGGG[A/C]TGTTTGGAGCTGCTGGACTTCCGAATCTCG
>A01_1457471
AGAGCAGAGAACATTAGGGCGTTGCGTGCA[A/G]CCAACGGCAACGTTAACGCTGCTGTAGAAA
>A01_1458778
ATTGGATGTTTGCTTCTAATACATCTAGGA[C/T]GATGTTGTTGAATGTTGTGATTTAATGATT
>A01_1459218
TGTGTTTCAAAAAAAAACAAATATGTTTAA[T/C]TAATTCTTCATTTGTAATCCATAATATGCT
>A01_1459357
CACCACGATCTCACTATATATATACAATAT[A/G]TCGATTAAAATCTTTTCCGCTAAAAAAAAC
>A01_1459438
AATTGAATCTTATAAACTATTACTAGTGTG[T/G]TACAAAAAAAAAACTATTACTAGTAATCTG
>A01_1459654
TCGTGAATATTCAACTACTACCTCCCTTTT[T/G]TATAACAATAGTTATCGTTTACAGCAATGC
>A01_1460776
TGATCTGTAATACGATGTTGTTTTATCTTC[G/A]TAATATATATAAACGAAATATGAAATCTAA
>A01_1461166
AAACCAGGCTTTACACCTAAGCAAACTTTT[C/T]TTCGAAATCAGAAATTGCAAATTGTAATTA
>A01_1461839
AGTTATCATAAACACAAGGATTCCACCTGA[C/T]TAATGGAGATTAAAGTAAGAGAGGCTATAG
>A01_1461886
AAGAGAGGCTATAGTAAATGACCATTTTAA[G/T]TCAGGTCTTGGAAGCGGCGAGTCGGGGATC
>A01_1462236
CAAAGTATATGTTAAAGTCGCAGAGAGTAC[A/T]TATACGTACATTATACCTAAACGGAAGTTT
>A01_1462457
ATATGCTCGTGTGCTTGCAACAATTAAATG[T/C]TTTTCTTCTTCTTATAGTAGAAGAATCCAT
>A01_1462489
TTTCTTCTTCTTATAGTAGAAGAATCCATA[G/T]TAGAAGAATCCAATGCCCAGCTACCACACA
>A01_1463006
TAACTTGAAAATATTAAATTATTTGATATT[A/T]GACAATAGTGATATAAGAAAATTTGTGTGT
>A01_1463044
GTGATATAAGAAAATTTGTGTGTTTATATC[G/A]TCATTGTCAAATATCAAATAATTTAAAGTT
>A01_1463885
GTTATTCACAAAGTCTAACCCAATTAATTA[G/A]GGAGGGTAATAGCATAGAGAATATCATTGG
>A01_1463945
GGTTGTCTTCTCAAAACTCTTCATAAAATA[C/T]AGATTCTTGATATTTTTAAAAGTGTAATGA
>A01_1464003
TGAATTTATTTTCGAAAAAGTTAATATATA[T/C]ACACTGTTGAATACTTATATGTAAAGGAAC
>A01_1464344
CAGCTAGTGAACGAATCATTGTATAGTTAG[A/C]AGAAACCTACAAATTTCACTATCTTGTTCC
>A01_1464702
TTTCAACTTTTAACAAACAAATAAAAAACT[T/G]TAAAACTAGGGCTGAGGTCACAAAGGATTA
>A01_1465491
TTAGTTTTCTGTCAGTTTAGTGTTTGAAAC[T/C]CACCCAAAGTCAACTTCTCCCTTTATTTCC
>A01_1465621
TTTTTGTGGGTTTTGTAGTTACTAACTATT[C/T]CTGGGGTTTTATTGGAAGATTGATTTGTTC
>A01_1465776
TAAATTCCATCATCTTTTTTTTTTCCTCTT[C/A]TGTGTGGCATTTACTGTCTGCTGAACATTT
>A01_1465817
TTACTGTCTGCTGAACATTTCAATTGAATT[G/T]TCTTTAAAGGGCTCAATAATTGGCCCTCTT
>A01_1466890
GGAGGGAAAGAACTTCCTCACCACTTTGGA[T/G]CAGCCACACTTCTTCAACCCAAAATACAAA
>A01_1466926
ACACTTCTTCAACCCAAAATACAAAAGCCT[T/C]AAAAGATACAGAGATGTCTCAGTGTCTTAT
>A01_1467202
TACAACTACTCAGAAGATGAATTACAGACC[A/G]GAACTTGAGAATATCTGTAAAGCTCTCGAG
>A01_1467362
TGTTAATCTAAGAAGTTCAGCCAACATGAA[G/A]TCTCCAAGCAGTGAGGTGTGTCAAAATGTT
>A01_1467724
TATTAGGTGAAAACATAATCCAAACCAAAT[C/T]CGAATTTAAACTCAAATATCCACCCCTAGT
>A01_1467964
AGGCAGAGGTGGATCCAGACATTCTGATGA[G/A]AACTTCTCAGAGTGTGTTTCAACTCTAGAC
>A01_1468888
AAATAAATACGATAAAATAATGAATTTCTC[G/C]AATCTCAAATTAAGCCGGTGTAAAATATAA
>A01_1468927
ATTAAGCCGGTGTAAAATATAAAACAATTC[T/G]TTAATATAATAAGATAATATTTTTCTAGAA
>A01_1469173
CATTTACATTCTTCAAAGCAAATTTTATAT[A/C]TACCAAATTATAAATAAAAATAATATGAAA
>A01_1469241
TTTTAAAATTTAGTCAGTATATATACGGTA[A/T]GATCAACTATTTATCATAGTCTATAGTAAC
>A01_1469495
GGGGCACTCGTTAAAGAAACTCCAGCTTGT[T/G]ATAGACTCTGTTCAAGGTGTTCAAGGCTCT
>A01_1469667
AATCCTCAAACCGAGAACGGTGTTTCACCT[G/A]CTGTGGCTCCAACCTCATCACCACCATCAT
>A01_1470083
TGAGATTGCTAGGCGTTTTAACATAGATAA[C/T]AATATTATTGCAACCTTTGATCTTAAATAC
>A01_1470272
GGGAGGCTCTTTTGGTAGTACCGGTCCTGT[T/C]CCTTTGCTATAAGCATTCAGGTAAGAACAC
>A01_1470412
TGTAACAATATTGTCAATGCCATTTTGTAG[A/T]AGTGTACTGGTTTTATGCATCGGCTTAGCA
>A01_1472606
TCAATTATCGAATTACTTAAGAAAAAAAAA[G/A]GTGATCTTATGGTGTAAGTGGTTAACTCTT
>A01_1472954
GACCCTAATCCCCGGCGACGGGATCGGCCC[T/C]CTGGTGACCAACGCCGTCGAGCAGGTGATG
>A01_1478998
TTGAAAAAAGTTCTATTTAAATTCAAATTA[T/G]ATAAAATATTTTTTTTGAAAAAACATATAA
>A01_1484764
GGCACTCTATTTTTTCCTCTATAATTTACA[C/T]TAAAATAGAGTAACTCTATTATAGAGTTGA
>A01_1486164
TCAAAGTACTACTGTCCTAAAAAGCTTTTC[C/A]TATTCGAAAACTCGGTTAATTAATGAAAGG
>A01_1487134
ATTTCCCCATACACGAACCTTACATGGACC[A/T]ACAACAACAACCGGGTTATAACCCGTACCC
>A01_1487840
GAAAGGCGTGGAGTACGAAGTGCACGTTGT[T/A]GAGAAGAAGACGGTTGTTGAAGACGCTGGC
>A01_1488019
AGATCGCTAAGCTGCTTGAAGTGGGGAAGC[T/A]TCCTTACGGTCGTAAACATGGTAATAATAA
>A01_1488427
AAGGAAGCTAAAGCGTTTAGATGAAAGAGG[T/C]GCTGAAGCTACCAAAGTAGACACAACTCGT
>A01_1488619
GCTTAGCCTCTCTACATGTTTTTGTTTATT[T/C]ATTTTCATTTTGAAAATGTTTTTTTTTAGG
>A01_1488657
TTTTGAAAATGTTTTTTTTTAGGCTTACGA[C/G]AATGTGGAAAACAATGCTCGAGTGTCATCA
>A01_1494675
ATTACTCTAATTAGGAGGTACGTCAACAAT[C/T]CAGAAATATAAACAGATATGCAAAAAAAAG
>A01_1494705
CCAGAAATATAAACAGATATGCAAAAAAAA[G/A]AAGAAACATGTGAATCAGAATTAAATATCA
>A01_1495012
TGGTACCACAAAGTGTATATCATTGAACAT[C/T]CGAATCATTTTTATTATTGTATTATAGTAG
>A01_1495937
AGCATGGGGTGTTGGGAAATTCAGACATAA[C/T]CGGTTAGCGAATCTGATTGGTTACTGTTGC
>A01_1496274
GACGATTGAGTGGGCTATGAGGTTGCGAGT[A/G]GGATATTACATAGCCGAAGCTTTGGATTAT
>A01_1496728
AAGTGTTACTTACAGCTTTGGAACTGTGCT[C/T]CTTGATTTGCTTAGTGGTAAACACATCCCT
>A01_1497222
ACTTTCGCCGTTAGGTGAGGCTTGCTCGAG[A/G]ATGGATCTCACAGCTATTCATCAGATCTTG
>A01_1498041
CTTACTGTGCGATCAACCAGACGCAGCACT[A/G]CGCGACGCGATGCAAGCGCAATGCGTGTAT
>A01_1498514
TGGTGGCACGCGATTAGAACTTGTTTTCTT[T/C]ACCACCCACAACTTCAGCTTCAGGGACAGC
>A01_1506659
TATGGAATGTCTTCTTAATTAAAAGCTTTT[A/T]AAGGGATTGAGAAAGTGTAGCTACATTGGC
>A01_1506718
GCAGTAGTGGAATCTATTTGGTCCTTGATC[A/C]AACTTCTTAATTGTGATGCCAATGCAGTCA
>A01_1506855
TCGGGTGTGTTATTTGAGGTTATAATGCTC[T/C]CTATTTATATGAATATGATTAGGGAAAATT
>A01_1507705
ATATAGACATTAACTAAATATAAAGTATAA[A/G]AAAGAGAAATACTCAATATATAAAAAAATA
>A01_1515468
AATGTGATTATTACCGACAAGTTTGATGTC[A/T]GTGTTGTCTACCAACCATTGTGCGCCGTCC
>A01_1515715
TCAGTGTTCAGTGTTCTGAAAAGCACACGA[C/T]GAACTCCTCTTGGTATGTTAAGAGACTTCA
>A01_1516114
TCTTCATGCTCGCGGCTAGCCATAGAAACC[G/T]TCCGATTCCTTCCGTTGAGTCCCACGCCGG
>A01_1516226
GACCTCACGGCGGATGGGTTTGAGTTCATC[G/T]GAGAAACCTCCGTCGATCGGAGCGGTTCCG
>A01_1516861
GGATGATAAACATAATAGGGATACATAAAG[A/C]CACTCTAGAAGTCTAAAGAGCAATCTCAGT
>A01_1516913
AATCTCAGTAGGAATGCTTGTGTTAGGACA[G/A]AACACAACTTGTTGTTGTGGATGTTGCACT
>A01_1517890
CTCCAGCTTCATGAACAGCTTGTGAGACCA[G/T]ACCCATGAGACCAATGCTTCCTCCTCCATA
>A01_1517981
CACAGAACAGAGAAGAAAAAATCATGGCCC[A/G]TTACAAGGTTTCAAGACTCTCATTTAGGCA
>A01_1518210
GAGGTTTTTTTATTTGAAGAAAATAATTTC[C/T]TCTCAGAAGAACGTGGAGTTCAAGCTAACT
>A01_1519150
TAAGTACTAGAAGGTTTCTTTGTGATTAGA[T/C]TCAAAGACAAATCCTCTATATGTACATGAT
>A01_1519636
GAGCTATAATATGTGGACGTACTATTAAAC[C/A]TAAGATTTTTAAAGATGGAGACATAAATAT
>A01_1519746
ACCCAATGGGCTAAGTCGGTTACAACTGGA[G/A]AGATTCTCGACGATAAACTGATAGACTAAA
>A01_1519904
CGAAATCGACGTTGAATAGCCCAACTAATG[G/A]GTTTTGAAAGCAAGAGTTCCGGGAAACTCC
>A01_1520594
TGTGATAAGATAGCGTCTAATCTGTCGAAA[G/A]TCAATTAAATACATAAGGTGTGTTGTTGCT
>A01_1521349
TAGTAGTACGTATGATTTTTTTTTTCCGTA[A/T]GATTATTTCGCTTTCGTTTTTCTCATATAT
>A01_1521790
TCCGTTCCTACATGCCACAAGACACAATAT[T/G]CATTTCAATCGACTGGTATGATATAAAGCG
>A01_1522760
CAACGTAAGAGTTCAAAGTCAAATTGTTCA[T/C]ATAGATTATTGGTGTACGATCATTTGTAAT
>A01_1523354
TATATAAACACACATACATAAACATTTTAA[C/A]ATTTCCATAGTATCTGGAATGGAACTAGAA
>A01_1523448
TATTAATCTATTTTTCTTACAAATAGTTTT[C/G]TTATAAATCAGACTATATATCCCGATTTTA
>A01_1524056
AAGTGACATAATGGATTACGTCATTGTGCT[A/C]ATGTCATAAAGGGCACGCAACAAAATTTAA
>A01_1524997
GGAAAAACAATAAAACAACTTGTACACATT[C/A]TGTCTGAAGATGACACAGTGCCACTTACTA
>A01_1525242
TATAAAAGATACAAGTTTCGATAACATTTT[C/T]AACGCCATTGGATTGATAGCCATTTCATTA
>A01_1525285
TTGATAGCCATTTCATTACGCGGGAACAAC[C/T]TAATCCTAGAGATACAGGTCTTAAAGATTA
>A01_1525926
TTATCTCGCGGTTCTTATCGGAGCAGTAGC[A/C]TTGCTTGTTACTTTTACGTACCCGTGTTTC
>A01_1526211
TTTATTCGTAATGACCACATGAGACATGAA[A/G]TTCAAAAAAACGATAGTGCACTGAATCTCC
>A01_1526520
AGTGTGTTATCTTCTTGCTCTTAAATGAAT[C/A]GAAAGCTATGAAAAGGTTGAATCTAAGCCG
>A01_1526582
AGAAGAGCTAAACCAAAAAAAATACTTCGA[G/C]AAAACTCAATCCATTTGTGATTGTCAGTTA
>A01_1526630
TGATTGTCAGTTACGTGGTACGTGTGACTT[G/T]TAACTTTTTTTTTTTTTGTTGCTAAATATC
>A01_1528012
CACATCAACCGTCAAATTCAAAGGAAGATG[A/T]CTGATAAGGCGAAGAGAAGTCGAACACACT
>A01_1528303
CTGCGTCAACACAGTGAGCTTCAACGCCCA[C/A]GGAGACATTCTCGTCTCTGGCTCCGACGAT
>A01_1530257
ATTAATTTATAGAATTATTAATTTACAATA[T/G]TTTTTTAAGATTTATATATTTTAAAGTATG
>A01_1531410
AGATTCGGATTTGAACCGGATAGGTTTAGT[A/G]TCATGAGCGCTCTTGGCGCTTGTTCTCATG
>A01_1531493
AAAGGAGATACATTGCTATGCTATTCGAAG[T/A]GGGATCGAAGATGTTATGGTGTTGACGTCG
>A01_1531540
TGGTGTTGACGTCGGTTCTTGACATGTATA[G/A]TAGATATAGTGAAGTTAGTTATGCAGAGAG
>A01_1531829
GGAAACTGCTCTGATTGATATGTATGGGGA[A/G]GGTGGGAAGGTGAAGTCAGCTGAGGCTGTG
>A01_1532236
TTTCGTGGAACAGCATCATCATGGCTTACG[C/G]GGTACACGGTTTTGGGAGAATCTCTGTTTG
>A01_1532885
AGAAGAGAGTTATGTTCACTGTGTTTCGAA[A/G]ATGAGACCAGAGACTCTATTAAAGAAAAAA
>A01_1533461
TATAACTTGATGGAAACAAACATTTCTCAA[A/G]GCTAATCACCGCACACCAAACACTTTTGTG
>A01_1533873
GATGTAATCATCGCTGGGAGGCTTAGGCAA[C/T]GGCTTCCAAGTCTGAGTCTTCAGGTCGAAA
>A01_1533959
CTCTTTGTGTGCATCCCCCTATTACATATA[T/C]CTTCTCATCTAAAAAATAAGACCTTGCGTG
>A01_1534001
AAAAATAAGACCTTGCGTGTTTCCTTGCCA[T/C]CTTCATGTCGGGAGCGCGACGCCACGTGTG
>A01_1534462
GGAGGCTTCTTCATCTTCTTTATTTTCTTA[C/A]GAGGTGGAGCTATAGGATTAGTTGTCATCT
>A01_1534516
GTCATCTCCGCTAGGGTTTCTGTTTCACTG[C/T]TGTGGGATTCGTATTCTACTAGGAAAATAT
>A01_1535318
ATTGATATGTTATAAGAATATAACATGAGG[G/C]CAACACCATTGCAACAATATTAATCATTGA
>A01_1535852
CATACGGTGATATTCAGCAAATATTAAACT[T/A]CCCATAATGCACCAAGGTCCAGTTATACCT
>A01_1536100
AACTCATTTTTTCCTTTGTCTTTTTGCATC[C/T]CCCAATCACATATATCTTTTCATCTAAAAA
>A01_1536604
ATGAAAACGATGGAGGCTTCTTCGTCTTCT[A/T]TTTTTTCTTACGAGGTGGAGCGATAGGATT
>A01_1540574
AACCGGGAAAACAAGAACACAACGTGAAGA[A/C]TGAAACTACACTGTTTAATCTCCTAAGCTC
>A01_1540704
AGTAGAGCTCGATCTTGAATCAGTTATGTC[T/C]GACACTTTTGTCTCTGTCGGAAAATACCGA
>A01_1540791
AACCGCTATCATCGAGAAACAAGGAGACAT[A/T]GCTCAGAACTGTAAGCTGGAGTCAGACTCA
>A01_1540821
AGCTCAGAACTGTAAGCTGGAGTCAGACTC[A/C]ATGCGGTCCCGTTACCTCGAGTGTTTATGC
>A01_1541028
TCAAGAACATGCAGAGAGTGAGAAAGAGAG[A/G]CAAGAGGGTTTAGTAAAGGCTAAGAGAGAG
>A01_1543532
AAAGAACCTCGTTAGAGTCAAGTCTTAAGT[T/C]TTAACTAATAGTGAGAGCAAAAATTTTAAC
>A01_1544387
TTCTTTATTAAGCTTAATATATTAATTTTA[T/C]AATCAGCAGAAAATACTAAAAAGAATGAAC
>A01_1544727
TTCTCAAGACACACCAGACTAAACTACATA[C/T]TGAAAAGCTAACAAAGTAGGTAGGAAAAAA
>A01_1545280
AGCCAAAACCTATTCAGAAACAAAAAAAAA[G/T]AAAGTTTATCAGAATCTTCACTACACAAAC
>A01_1545321
AGAATCTTCACTACACAAACCCACTTGAGA[C/T]TAAAACAAAAAAAAATTTAACACAAAAGAT
>A01_1545491
AGATTATACATAAAGCTCTAAACTTTATCA[A/G]AAACAGAACACTTACGGGGATGTGAGAGTC
>A01_1545525
CAGAACACTTACGGGGATGTGAGAGTCACG[G/A]GCGCTTCTCTTAGGGTCAGTAGCAGAGAAC
>A01_1545627
AAGAGCAGTCCCGGTGCTGTAACCGTCGGC[T/A]ACAGTGTTAGCTCCCCCACCGAGAGTGTTG
>A01_1545687
GTAAGGAGTCTTCATGAAAGCTTTCACGAA[A/C]CCCACACCACAGATAGCTCCAAGACACTGA
>A01_1546071
CGTTTGCTTCTTGTGGCCGATGACGGTGGC[G/T]ACGGTGACGTAGAGGAAGAGGAGTGTGGCG
>A01_1546206
AGGGTCGACGTAGTCTTTCCCATGGCTGTG[G/T]GTTTGTCCCTCTTCGCTCACTTCTTTCGAC
>A01_1546463
CTCTGCTAAAAATCATTACTTTGTACTAAT[G/A]GTGTGTTAATGGAAAGCTTCTTGAGTTTTT
>A01_1546622
AAGGCATACGATCATTCAATCACTAATAAG[G/A]CAGTATAGTTCAAATTTATTTTTTTAGTAA
>A01_1546669
TATTTTTTTAGTAATTTAGAGTATATGATA[G/T]TGATTACACGAAATCAAAGGTGGGCTCCTA
>A01_1546743
AATCTTCTGTTGTTCTGGAATTGTTAATAT[T/C]TTTTTTTCTTGCTTATATATAACAGTAAGA
>A01_1546895
GGTTAAATTATTTGAAAAGTTTGGAGATAA[A/C]AAAAAGGGAGTAGAAGGTCGTGGGATCCAG
>A01_1547311
AAAGAGGGAAACTGAATTTGATTGATGGTG[C/T]GTTGCACCTTTGACAAAATTTGCAAAGCTT
>A01_1547812
ATCATCATCGTTTTGGTCCGCCTCGACTCC[A/G]AAAACCGAAGTAGATTTCATTTTATTTGAC
>A01_1548460
CTTTGCGAAATAAAATGCCAGGTCGCTGTG[T/C]AATCATGGAAACTGATTATCATTTTCCTCC
>A01_1548636
CTGTATATATATACTCAACTTTAATTTGAT[C/T]AAGCCAAAGCTATGTGGAGTCTGTATCTAT
>A01_1548709
AATTTAGACAAACAAACAATCAACGGGGTG[G/C]TTATGCGTTTTAATATAATCCATGCCTGAT
>A01_1548791
GAGGTTGGATATCATTGCATGTGAGAACGA[T/C]TCATCATCATACATTCATATCATTACATTA
>A01_1548835
TTCATATCATTACATTAATTCGCTGCATAT[T/C]CTTTTAATTATGTTTTTCATCCAGACAAGA
>A01_1549457
ATCACATTTAAACTAATAAAAAAATAGTTT[G/A]AAATAAATTTATATTAAAATCATAAAACAT
>A01_1549547
AAAACAGATGGAATATATGTTTAATACATA[A/T]GGTAAATGAATAGCGAATACTGTTCGTTCA
>A01_1549746
AGCATGACCACTTTTTTTGGGTTACAACCA[C/G]AGCCGCGAGAAAGATTTTAAAGGTCTAAGA
>A01_1550217
TTTCATATGATCAGATAGTGTAATTCTCGT[A/G]GAAACGGTTTTTCAAAATAAATCTAAACCA
>A01_1550381
CAACATTGCATCTATAATTTCATTTGATCT[A/T]AGAGTTTTCATATAATAACACATCATTTCA
>A01_1550715
GTATCTTTTTCTTTTAGAAGAACCTGGACC[G/A]AGTGAGACAACGTGAATCTTGTGAAGAAAA
>A01_1551700
TACGACAGCCAGAGATTATACAGTTAAAAA[G/A]ATCTAGACGTAAGACATAAACGAATTAGAA
>A01_1551913
AAAAGGATATCATGTTAAACTTGAAAGCGT[G/T]ATAATCAAAATTGTATTCTTTTGTATCAAA
>A01_1552161
TCCTGAACTTATCGCCACAATAAAGAATTT[T/A]TTTTTTTTGTAGTATTTGATTTCTTCCAAA
>A01_1556220
TTTCCCTTTGTTGGTTTCTTGAAGTTTTAT[G/A]GAGATTCATTTATGTCATCACGGTTTGACT
>A01_1556255
TTCATTTATGTCATCACGGTTTGACTTGTG[G/A]TTCTTGTTGAGTTGATTATTTCAAATCATT
>A01_1557201
AGAACTGGAGAGTCATGGACTTCTTCTCAC[C/A]CCACCCTGAGAGCTTAAACATGTTCACTTT
>A01_1557340
CAAATCCGGCAAAGCTCACTACGTCAAGTT[C/T]CACTGGAAACCAACTTGCGGAGTCAAGTCT
>A01_1557373
CTGGAAACCAACTTGCGGAGTCAAGTCTCT[A/T]CTAGAAGAAGATGCAGTCCGTGTAGGAGGA
>A01_1557424
TGTAGGAGGAACCAACCACAGCCACGCCAC[C/T]CAGGACCTTTACGACTCCATTGCCGCTGGA
>A01_1557508
TATCCAGACAATGGATCCTGCTGATGAGGA[C/T]AAGTTCGACTTTGATCCTCTCGATGTGACC
>A01_1559726
GCAAGTATGAAACGATAAAGACAACAAAGT[C/T]CACAGAATCTTTACGTCATTTGTGTGGGTA
>A01_1559820
TTGAATTGGCCACATCTAATAAACGTTGTA[C/T]CAAAGTCAAGAGTTGTTAACTGTAACACAT
>A01_1560177
GCACCTTCTCTTTCAACGCCTCACTACAAG[C/A]CCCTATAAACGCCGTGTAGCTCCCCATCGC
>A01_1560574
TAGGAGAAAGAGTAAGCCGAAGATGACTTG[A/G]CCAGCGTCGTGCCCGCATCCCCAGAGAGCT
>A01_1561955
TAACATACCAAAGTTAGATCTAACTTTACT[T/A]CTCCATGGTCTATAGCCCATTCGATCATAG
>A01_1562083
AACCCATGGTCTAGCTCATTTCATCACATG[T/G]AATTTACTTGGTGACCAATAAATGATAATG
>A01_1562145
AATTGAAATGTCAAATACTTCGCCTAACAA[G/A]GGAAAAGTAAAGCAACGAGATATGGAATCC
>A01_1563596
TCTTTTAAAATATTGATTAGAAATATTTTA[T/A]TAAATTGAATAGGTAACTACTGATAATTAT
>A01_1563718
TAGTATATGTGAAAAAATTCAGTAAAATAT[T/A]TTTTTTTTTGAAAAAGAAAAATGTTAAATC
>A01_1563816
AAAGTATCAAATTTGGAATATGTTTGCATC[A/C]AAAGTCCGTCCACTACTATTGGACCACAAG
>A01_1563923
AAATTCATTATATAGAAAGAAAAGTATATG[G/A]ATTATATTCGTCAAAATCCAGAATAAAAAT
>A01_1564137
AATTCATTATTATTTTTTGTCAAAAATTCA[T/A]TATATAGAAGGAAACATATATGGATTATGT
>A01_1564220
CTTTAAAAAGATTTGATGAAAGAAAATGAA[A/T]CACAAAATAATTGAATTCAAAAATTCATTA
>A01_1564255
AAATAATTGAATTCAAAAATTCATTATAAA[T/G]AAGGAAAATATATGGATTATGTTAGAAAAA
>A01_1564293
ATATATGGATTATGTTAGAAAAAAACTTTT[A/T]AAAAAAATTTATGAAAGGAAATGAATCACA
>A01_1564700
AACAAGTCCAGCCTCGCACTCCGTGCAGCA[A/G]CAGAGATGCCTACACGGCAGAAACAGCACT
>A01_1564744
ACGGCAGAAACAGCACTCTCGTCTCTCCAT[C/T]AGACCCACAATTCAAACAAGAACCACTCAT
>A01_1565298
TTGTTATTGTTCATGTACAACTCGTCCATC[A/C]CGATTTGGTTAATAACGTTCGAAGCGTTGT
>A01_1565341
TAACGTTCGAAGCGTTGTAATTCAACTGCG[T/C]TTGTATCGCCATCTTGTTTCAGAGGAAAGA
>A01_1565630
TATATATAGGTAATAACTTTTTGGTTTATG[T/C]TTAATATTAGCGCTAAAGAAACGACGTACA
>A01_1566191
AATTGATATAATATCGCTTTTTCTAAGTAA[A/T]TTTTCTTAGTCGGAATGAAATATGCGTTGA
>A01_1566276
ATAACCAAATCTGTTGGAACGTTATCTTTG[A/G]GTGACCATGAAACTATGTACTTTGAATATT
>A01_1566621
AGTTTTGAGCATTAGTAGAAAAATTAGTTT[A/T]AACTTTGTGTCTCAGTTGTGTATTTTTCTT
>A01_1566673
ATTTTTCTTTTCAGTGTCTGTGTATTATTA[T/A]TAAGCCGAGAAACTTATATATTCAACAATT
>A01_1566866
TGGAAATACACGTTTCTTGTAATTACATAA[C/T]CTTTCTTTTTTCTGGAAAATACGAACATAT
>A01_1567056
AAGTTATAATTACTGGTAATTTTATATGGT[C/T]ACGGTTATAGTTAGGGTCTCAGGGATCAGG
>A01_1567522
ATCAATATATCTAGGCTCTATTACCGTTTG[C/T]TATCGCATGCTCAAAAGATAAGAAACAATC
>A01_1567713
TTCTTTCATGGAATGGCTTTTGGACGGTAA[T/G]GAAATAAAACATGGAGAGAAGGGTCCATAT
>A01_1567758
AGAGAAGGGTCCATATTTATGAATTATGAC[A/C]TAATACACATGCTATAGGAATGGAGCAAAG
>A01_1567788
ATAATACACATGCTATAGGAATGGAGCAAA[G/C]CATGTGGTATATATTTTTCAACTATAAAAT
>A01_1568223
CAAACGTTCAGGGACCGAGAGAAATGTACC[A/G]AATCTAAAGGGTACCTCTCAGGTCAACTCA
>A01_1568382
AGTGAAAACACATCATACTAATATATATAT[C/T]TATGCATTGCATGTAACTTGTTCAGGAATA
>A01_1568491
CTGTTAACTTGCGTCTAATTTAAAGAAAAT[A/C]TTTTGTTACAAATATATAATAAGTATGTGG
>A01_1568531
AAATATATAATAAGTATGTGGTATAAATTG[T/C]ATATTTATATAGCAAGTTTGCTGTTAATAT
>A01_1568585
TTAATATTTTTGATGTATAAATTGAATTAT[G/A]TATTATGTAAAATATATTATAAATATAATA
>A01_1568666
TTTAATAAATTATATTAGGATATATAAAAG[A/G]ATTATGTATATAACTTTTTGAAGCACCAAA
>A01_1568787
AATTTTGTAAAAATATTTGACTAATAAGTA[A/T]ATAGTTATATCAAATTATTATGGATATTTC
>A01_1568852
ATTAATAAAAAGGTGAACGTAAATAATTAC[C/A]AAATATATTAATAATTTGTTTAAATAACAA
>A01_1569369
AAATGTAAAACCATATTAATATCTTTAGAG[A/G]AGGTTTTATAGGTTATAACTAGATGCTATA
>A01_1569401
GGTTTTATAGGTTATAACTAGATGCTATAG[T/G]TTTTGGTGTGAGAGGTTGTTTCTCCGCAAT
>A01_1570420
GGTTTCACTCTAATTTATTAACGCATGTAT[C/T]AAATGACCCTTTCTTTACAATAAACTATTT
>A01_1570761
TAATCCAATATTGTTATCTTTTTGTATTTT[C/T]TAAGTTCAGGATTTTACATAAATTAATGTA
>A01_1570863
AGATTTTTCGAAAAACATAAATAACTTAAT[A/T]GTTTTTGTTTTATACTAGAAATTCCTCATA
>A01_1571753
CATGCAAAGGTGTCGCAGTCTGCGATGGAC[A/C]CCGACACACGAAACTCATGTGAAATGTTCT
>A01_1572494
GAAGGAACATATGCGACGCCGGAAGCAGGG[G/A]TCGGTCGGGAACACCGAAACCGGAAAGCCA
>A01_1572700
GGTCTTAAAAAAAGATTTTCACGTATAAAC[A/G]TAAAAATGTTAAAATATATTTTCAATTATT
>A01_1572749
TTTTCAATTATTTATCGTGCATCATCCTCT[C/G]CACTTTATTTTCTTCACACGTTGATATAAA
>A01_1573644
GTCCTAGTAAGTTCACTTACAAGGACCCAT[G/T]ATTTCTTTTTTAAGAACAACGGACCCATGA
>A01_1574266
AATAAACTATGTATAAATCCATTAATCATT[A/T]TTTTCAACTGTTTGATTATATTGATTATCA
>A01_1574386
ATTATTCAAAATGAGATGTGGCTTTCATAA[A/G]GTCTTGTCTGCAGTAGCTAGCTAGAAGGAA
>A01_1574993
CATGTTTTTGTTGAATAATACCAGAAAAAA[A/G]AAGAATCATATCATATACCTCCAAACTTGA
>A01_1575507
CTACGACAATAGAGCTCCTGTTGGGTACGT[G/T]AGGAACACCGAGTATGATCCACATGTGTCG
>A01_1576061
CTATACTTCGTTCCTCTTGGACGTAATATA[A/G]TTCGGTGGAATTGAGTAGTACGAAAAATTA
>A01_1576094
CGGTGGAATTGAGTAGTACGAAAAATTATG[G/C]TTATGCTGTAATCAGCCATGGTGATTAATA
>A01_1579017
CTGACTCTGCAGCCTCTTCACAAGCTGCTG[G/A]TTCAACCCCCTGAGCCTCGAACACTCGTCC
>A01_1579083
GGAAGCAGCTTTAGCCTTCTTCTTCTCTCT[A/G]TACTTCCTAACGGCTTCTCTGTTCCCCAAA
>A01_1579116
CTTCCTAACGGCTTCTCTGTTCCCCAAAGG[C/T]CTCTTTTCACCGTTCTTGCCACAAGACTCA
>A01_1579639
CAATTTCTGGGAAAGACTGAAAATTTCATC[T/G]TCGAGAGTAAAGAAATCGAGATTGAGATGA
>A01_1580042
ACAATTTTTTCAAGTACGGTTCTTTATTTT[T/A]TTTTTCTTCTTAATTTGTTAATGTCCTGGT
>A01_1580421
TATAAATACACTAGCTAGCCAATTTCAAAA[T/C]GATATAGTGAATTTGTTCCTTGAACGAAGT
>A01_1580824
CTGTTCATTGAAAAGGAGAATAAAATCCCT[C/A]AACTAAAAAATATAGCGAAACAACTCTTCG
>A01_1580854
CAACTAAAAAATATAGCGAAACAACTCTTC[G/A]ACTAAAGATTTATCGTGAAACAATCCTTCC
>A01_1580903
AACAATCCTTCCACTATAAATTAGACAAAT[A/G]AAACATTCAACTTCAATTGCATTAAACATA
>A01_1580970
CCTCCGTAACGGAAGATGACATACACTAAC[G/A]ATTTGTAGTTAATGGTTTATAATGTTAAAT
>A01_1581118
CTGGACAGAAAATACCAACAAATTTACATC[G/A]TCGTTATTACCAACAGAACAAGGTGGTCCG
>A01_1581291
GTACTTTGTCAGAATTACCCATTTCTAACC[G/A]ATTACTGATGGGATATTCCTTTGGCATTAG
>A01_1581413
TTTTTGGTCCAGTTTTTGGTATTTTCGTCG[T/C]AATGCAAATAAAACCATCATCTGTTGATCT
>A01_1581820
CGTTCGTATAAAGAACAGTGGAAATGATCG[A/T]TTTTAGAATTATCTGTATTTATTAAGTTTA
>A01_1582211
GAACAATTATATGGGAGTCACCTAAATATA[T/C]ATACCGGCAGATCATGAAGCGCATCATATT
>A01_1582333
ATCCCAATATGTATTACTCTTGTTGTAAGT[G/C]ATATATTTAGGACAACTAGATTTCACCTTG
>A01_1582560
ACTTAAATGGTTGGTTGATGTGAAAATTAG[C/T]GATCGTGAGATAAGTAGCTTTCTTTGAAAG
>A01_1582846
CCTTAAGCTATATGGATTAATAGATGTATG[A/C]GAAAGACCTTCATATTTCATATCAGAACGT
>A01_1583148
CGACAAATTTTAGATTTGTAACCGGATATC[C/T]GATTTGATCCGTACAAAAAATGAAAAACTA
>A01_1583493
AATCGAAACGGATAATGAATCGAATCAAAA[T/A]ATAAGGATATTTTACTCATCCCTACTCATG
>A01_1583578
TCTCGTTGTTGGTTTTACATAGCTTTCCTT[A/T]TATATATGATACCTATTACCTTTGTTTATG
>A01_1583626
ACCTTTGTTTATGTTGTTTATTATGTCAGC[C/G]TGGCTCACATAATTTGTTAATATTGTCCAA
>A01_1583709
TTACTACTTAGCACCGTTCGGTTCTTATTT[G/T]CAAAACGGTTATCTAACGAGTTAACGCTAA
>A01_1584547
TAAACAATATACTACAATAAATTTTAGACA[A/C]CACGATTCTGATGTTGATTTAAAAAAAAAA
>A01_1584657
GGTTAAGTACCATTTTCAAGGAGGTTTTCT[C/T]TCTCTGAAAACGTGAAAGTCAAAATCCCTA
>A01_1585313
GAAGAGTAACGATTCACAATCTCTCGAAGA[G/A]TGCTTTTCTGTTCTATATCCCATCCGTTTC
>A01_1585599
CTCTTCAGTGGATGTCAAAGTCATTGTCGA[C/A]TTGACTATCAAACTACCTATCATTGTAGAG
>A01_1585704
CCCTTGGCTTCCTCCTCTATGTCCGGTTTG[C/T]AGCGAGATTGGGCATAAAGCTAATTTTTGT
>A01_1585793
ACGACAAGGTTGGAGGCAAGAAATCCTCTA[A/T]GTCCCATAAGGCCTCTTGGAAAGCTAAGGA
>A01_1585860
TAAAGATCATGTTTCTGGTACGCAACATTC[T/C]AAGGAACCTCCCATACAAGAGCAATCTGTG
>A01_1586100
TCCTCTGGAAAATACCCAAGCAGTGGATGA[G/A]CCTGTCCAATCTCTTGTACCTACTGTTGTT
>A01_1586314
GTTGATCCACCTCCTGCTTTGAAGGATGAT[A/G]AAAACCTCTCTTTAGTGGTCTCCACTCCAG
>A01_1586865
CAGTTATGGATTTCTCTGAGGGATACTGCT[G/A]TTGCTTTTGATTTATCTTCTCACCCTTGGA
>A01_1586928
GTCTGTGGAGATTTTAATGAAATTCTTGAA[C/A]CGCGGGAGTCGTCTAACCCGGCCATTATCA
>A01_1587431
AGTGCAAGAGGCGAAGGCAGTTCTGGATTC[A/G]CATCAGATTCAAGCTCTTAATTTGCCTTCT
>A01_1587869
CAAATCTACGCTGTTCAAGCTCTCTCTTAA[C/T]CGCACGCCGGGACCTGATGGACTAACAGCT
>A01_1587989
TTTCTTCATCTATAAGTTCATGCCTGCGGC[A/T]CTCAATTCCACTTCTCTTATCTTGATCCCT
>A01_1589758
GGGGAATAGATTTGGAGAACTGCTGTCTTC[T/C]GTGCGGAAACTCCCCGGAATCAAGAGATCA
>A01_1589821
TGTTCTTTCTATGTCCATACTCTGTTCGAG[C/T]CTGGGAGAATGCTATTGGTGTGTTGGGTTT
>A01_1590032
TACAAAACCTCATTTCATGTTATCTAGAGA[A/G]GTCATCAAGCTGGCAAAGGATAAGTCGACG
>A01_1592970
GTTGTACAAGTACCATCTAAGATTTTTTTT[A/T]AAAGCTTTAAAATCAGTCTCGCAACAACAA
>A01_1593470
CATATATACATCAAATATAAGTAACTATTT[G/C]AAAATGTGATATTTATTTAAGTCCAAATAC
>A01_1594923
TTGATTTGTTCAGGGATTTTACGTAAACAG[G/C]TTAGGTTCGGGTTTTTTTCTTCTGTTAAGT
>A01_1595398
AAAACATTAAAGATTAGTTCCTGATGATAT[T/A]AACGAACTTAGTTTTCTTGCAAAGGAAACA
>A01_1595432
GAACTTAGTTTTCTTGCAAAGGAAACAAAA[T/C]TTTACTTGTTTAATACTGGGACGATGTGTG
>A01_1595567
TTCTGGATCCAACAGCTCATTTTCATTTCC[A/T]GTCTCAATCAACGGCTTTGCCTGCGTTACA
>A01_1595608
ACGGCTTTGCCTGCGTTACAAGAGTTAATA[T/G]TTTTAGGGTTTTATGTAGTTTTTGCTTGCG
>A01_1598099
AAGCAACAACACAGCGTTGGTGTCTTGTGA[A/G]AGAAGCTTTCATTACCTGAGGTTGGAGCTC
>A01_1598395
AAGAGTTTCCTCTAAACTTCCTTTGGATGA[G/A]AGGTTGTAAACAGAGATTAGATCATTGTCT
>A01_1599125
CAAAGCCATTGCTCTTACAGATCGTCGTTA[G/A]TGATGGCCATGGAGGCAGTTTTTTTCACGC
>A01_1599485
ACTAAAAACATAGATAGATTTGAAAAGATA[A/T]AGTAGAGCAGAACGGGACAAGATAGTGTTA
>A01_1599673
AACAATCTTACACATTAAAGGACTTGAATT[T/A]TCTCAGACGTAATTGTTGATCATCATCTTC
>A01_1600044
TAAAGCGTAACGAACACGCCTCGACTCAAG[C/T]CTTGAAGGCTGCCCTACTACGTACGGCAAT
>A01_1600352
TATAGTAAATTCATTTTTTCTGAACTTACA[T/C]ATGCTAAGAATAATTAATTTGGTAATCTAT
>A01_1600393
TAATTAATTTGGTAATCTATCTGAATTATT[C/T]GAAGGGCCATTGAGAACGAACACATTATAA
>A01_1600754
TTTTGTTAAAACACTATTTTGAAATAATAT[T/A]GTGTGGTGGGAATCGAATAATATATACGTG
>A01_1601007
AATATTTCTATTATTTTCACAATTTTTATA[T/G]ACGTTATAATCCATATTTCAAATCCCTGGT
>A01_1601150
CTAATCGCAATAATATACTTGTTCATAACT[A/G]ATTATATGTGGCTGAAACCACATAAAACGT
>A01_1601449
TCACAATATAGAACAACCTTTCTGAGACTT[C/T]CTCTTCTTCCTCTTCTTGTTTTTGGGTGGC
>A01_1601754
TGTTTTTGCACTGCATTCGATATAAGCAGG[T/A]GCCCCAATCAGCTTCTTCAGTTCTTCACCC
>A01_1602912
AACCGTGGGGAAAGTGTTGCTAGTGTAGGA[G/A]ATGAGCAGACAAGTCTTTCCGACAGCGCCG
>A01_1603183
AAAAAAAAAATAATTAATTTAATTTAATTG[A/C]TCAGCTGGTGCGTTCCCCAAAAGAATACCC
>A01_1603286
TTTTTTATTACTTATTTTCCCTCTAAAAAC[C/T]AAGCAGCCTACATAATTTGTTTGTACTTTT
>A01_1603368
AAATAATTTATTTGTACTATATAAGTTCAG[T/A]AACTATACATTTGTGAAAACGTATTATCTA
>A01_1603700
GCTCATATTAGGCTAAAAATGGGCTAAAAC[T/A]AACTTTAAAAATAGAAAATAAACAAAATCA
>A01_1604245
CTTTTTTTCTCATAAGGTTCTTTGTATTGA[C/T]ATAGAGATTTTTGGATTTTGTGTAGATGTG
>A01_1604517
TGATTTGGTAAAGTTCATAAAGTTGATTCA[G/A]AAGAATGGCATGTATGTTACATTGAGGCTT
>A01_1605050
GCGGTTCAACGCGCATATAAAGAAGACGGA[T/G]TAAACTACATTAAATGGGGATCAAAGTTGG
>A01_1605083
AACTACATTAAATGGGGATCAAAGTTGGTC[G/A]ACTCAATGAATCTTGGGATCCCATGGGTTA
>A01_1605604
ACAACAGATTGAGTGTTGTAATTCTTGAAA[T/C]GAGTATATGTTGTGTTATAAATATTTGTAG
>A01_1605859
AGATACAGAGGTATTACAATAACATGTAGT[G/C]TCGTCAAGAAAGAATCAGTGTTTAGAAATT
>A01_1606027
AACCATTAAGTTCAGAGGCAGAGACTACGT[T/G]ATAGCTCCTCGTTCTATTAGTATTCTTCCA
>A01_1606186
ACTGGATCAGATTGTTTCTCACCACACTTC[A/G]AGGAACTTTATGAAGTCTAAACAGGCGAAC
>A01_1606250
AAAAAGTTTGATTTCAAAGTGTTCACTGAG[C/T]CATTGCCTAAAAAGCTAGAAGGTAACTCTT
>A01_1606816
TGTGTTCAAAAAAATAAATAATAATAAGTG[A/G]TTGGCCTTTTTCTGTTATTACAGGACAGTG
>A01_1607071
AAACATGTCCTTGATTTGATCCTCATTTTA[A/T]AAAATCTTTAGGTCGGTATGGAAGGTGAAA
>A01_1607373
AAAAGGGTTGATTTGGGTGAACGGAGAAGG[T/C]GTTGGAAGATATTGGATGTCTTTCTTGAAT
>A01_1607900
GGGGAAAGCAGAGTGTGTGATTCCGGTGAA[T/C]AAAAGCACATTCCAACAAGACAAGAAGGAT
>A01_1608032
GAATGGTTCATATTCTGCGTTTAATTGACC[A/G]ATTTCAAAAAGTGTTGTGGCAGTGTTGATT
>A01_1608112
TTGGTTTCTTGAATTTAAACGTTTACATCC[G/A]AGTAAGATATTGGAATATGATCCGAGAAAG
>A01_1609125
TATACTCTATCCAAATTCTTTATTGTTAAA[A/T]ATTAAATACTCCATTGTGTCGGTAGCAGTT
>A01_1609231
TCTTTCAGGTATCCAACAAACTCTTACCAA[C/T]AAAGCTACTTTCCTTTTCTATAAAACATTA
>A01_1609300
ATTTTTTTGCCAACACTCCAAACAGTTTTA[A/G]AAACCAAACCAAAATTATTATTGATATGTT
>A01_1610649
TTTACGGCCTGTACATTATAACTCCTGAAC[C/T]GGTGCTAGTCACTAGTAAATATAGTTGTTT
>A01_1610732
GTTTGATGATTGATCACATTACTTGGGTTA[A/G]AAACTAAATGGAACTTTGATAATGATATGT
>A01_1610954
GATGCTACTGCAACCTACTTACCAAACTCA[G/C]AATGACAACTATTATCTTCTCATTATTGTA
>A01_1611355
GCCATTCAGACTCGAACGTGTCTATACGTT[A/G]TATAATATGGTTTCACACACCTACTCGGCT
>A01_1611680
ACATCATCTCTCCATATAACCCTAGCTAGT[T/C]TCATCATCACAAGAACCAGAAGAAGAAGAA
>A01_1612530
AGATTTGAATCTTGAGCTTAGAATCAGCCC[A/G]CCATGGCAAGACCAACAGCACCATGATGAG
>A01_1612635
CCGTTTTGGGTTGGGAAACGGCAAGGAGTG[T/C]AGCTGCGATAATGTTAAATGTCAAGTCGAG
>A01_1612677
TGTTAAATGTCAAGTCGAGGACAGTAGTAG[C/T]AGCAGCAGCTATTCTTCAAGCGATATTAGT
>A01_1613625
TTATACGTATGATTCTAAAATTAAGATATG[T/G]CATATATTATAAGATAAATGATTCTGAGGA
>A01_1613678
TCTGAGGAATGTGAGAAATACCTAAGAGAT[G/A]AAACGATATCTATAGAGATTGAAAGAACGA
>A01_1613923
CTCTAACCAACTGAGCTACGAGAGCTTTTG[C/T]GTTATTTGAAAATATGATGGTTTGATATTA
>A01_1614564
AAAGTCTCACATACCAAGTCAAGCACTAAA[G/C]AACAATAACTAACATTAATAGATAATTAAC
>A01_1615287
ATTTGGTTTTACCGTCTTCAAAGCCATAGT[C/G]AGTGTTGCTGAGCTAAGTTAGTGCCTTCTT
>A01_1617722
GCATTTCATGTGTTTATGATTTTAATTGAT[C/T]AGTGTCTCCTTTGTAGTTTGTTATTTGGAG
>A01_1618348
AAACACTAGAAAATCTATCTTTATGAAATT[C/T]AGTATCAGATATCTACATAATAGTAGACCG
>A01_1620002
ACACAAGAAAGCAACTTCACAAAAGGGTTT[C/A]AGAGAATCAGATCTCTCATAATAATCTTTC
>A01_1620058
CTTTCAATATTTCCGAATAGTCGAAAGAGC[A/T]TTCAAACAGATCCAACATTACAGTTTGAGA
>A01_1620420
CTCAATTCCAAGTGTGTTCTGTTTCTTCGT[C/T]GAAGATGGGTTTTGTCTTTTTTTGTTTGTG
>A01_1621343
TATTATTTTATGGAGTCGTCGTTTAGGAAT[C/G]CGACAACGTTCAGTGTTTCCGAATATTTTC
>A01_1621439
CTTGCCCACAAATCAGATCACATTTTTGAC[T/A]AAGTTATACTAATTGTGGCAGCTGTGATAA
>A01_1621639
TTCAAACATAGCATGAGATCTTTTGTTGAA[C/T]ATTTTTGTACACGCCGATGGTAAGCTTTTG
>A01_1621731
TCTTAAAGCTACACATGTACTGCTTTGTAT[G/A]GTGAGTAAATGATGATAAATTTAACCAAGC
>A01_1621765
AGTAAATGATGATAAATTTAACCAAGCGGA[A/C]ATCATCAACTGAGGCTCTTCCGTTTCGGAG
>A01_1622194
AATCGCATATCGAAACCAAAACGAATTTCA[A/C]TATAAAAAGAATATTATAAATAAAATTAAC
>A01_1622327
AATAGTGTGTATATATAATTTAGGTTTTTT[A/G]ACCATTGTATATAATTAATTAAGCTTTGCT
>A01_1622426
GAAAAATTTAGATTGCGTGAAAGGAACTCT[C/A]ATGACTAAGTTTATAGAGATTCAATAACCA
>A01_1622494
CACGTTAAGCAGTTTATGGTAGTTGTATAA[A/C]GAAGATAATGACTGCGTTCACTTATCAAGG
>A01_1622529
ATAATGACTGCGTTCACTTATCAAGGAGGA[A/T]GTATCTTGTGGAAAATGTTAACTGAGTTCC
>A01_1622584
AGTTCCTTCCCAAATCACATCAATAGTTTG[A/G]CATAATATACTACAGGAACAACAAGATATA
>A01_1622672
ATGCAAGAGCTTACAAACACATTGGGTTAT[C/G]CGTGGAGCAGTCGAAGAACAGAGAAAAAAG
>A01_1622823
AGTCGACAAATACAGTTGTCACAACCGACT[G/A]TATATTTTATCAAGTTTTAATGTGGTAGTA
>A01_1622921
ACCCGCTAAATAACTAAAACATCGTTATCA[G/A]AACAAGAGACTTATGCGCAAAATTATCAGT
>A01_1623361
AAGTATTCAGCGGCATGTTTTCTGATTTTT[C/A]TTACACTAGGTGGAAATGGCCAAATGCGGA
>A01_1623645
GTAAAGTTCAAAAAAGTAATATCATAGTGA[T/C]TATCATTCTTTTTTCTTAATGTGATATTAG
>A01_1623699
ATATTAGGGTCAGAAATAAGTTACATGTAA[T/C]ACTACAATACGACCATTTCATTGATGACAT
>A01_1624046
TATGTTATCCGAATGAAAAATAGATAAAAC[G/C]AAACCAGACTGGAAGCTTCTAGTCAGGGGC
>A01_1624569
AGCTGTGTCGCCGACTTGCCGCAATAGTAA[T/A]TACTCCGATGAATAAAGCGGTAGTTATAAC
>A01_1624846
ATAATCAAAACAAAACATAAAAACTTTATT[A/G]CATAAATCATTTTATTTTGAAATGGTCAAT
>A01_1626014
CTTTCTTAATTTGGAAACTCTGTTTCTTTG[T/C]GTGTAGATGTGTGTCTTTCTATGTATGGGA
>A01_1626368
CATCGTCGCCGTCGTGATCGCCGTGTACCT[C/T]CAGTCGTACGACATCATCGGAGTCAAGACC
>A01_1626533
CGCGGAGGAACCGTTGCTGAGATCGGAGAT[C/A]GCGGAGGAGACGGTGGTTGTCGGTGCCGCA
>A01_1626776
GGGTCAGATCGGGCTTGCGCTTGGTTACAC[A/G]GACGTGTCTATCTTTGTCTCTATGACGAGC
>A01_1628280
TTGTTTACAATAATGTCTCAAGACTAACAA[T/C]GTTTTCTCACAATTCTTGTTTACTTGCATG
>A01_1628336
GCATGTTTACATGCACTTTCTATGTTAACA[A/C]TAATTACGCATCTTGTTTACAAACGACCTA
>A01_1628440
TACATGGCTTAATTTCATTTACTCCCTACA[T/G]AAACAAGTAAAAGACAATTTGAATCCCGCA
>A01_1628536
CAAAAATGCAAAACAAACTTAACTGGAATA[T/A]TATTTGGTGTATAATCTAAATCAATGTATA
>A01_1628926
CGGTACACTCAACGCAATGTAACATAGTAG[T/C]ACCAAAGACGGAACTTGAACCATTTGTTCT
>A01_1629019
ACCACCTGCCGCTATGATCGCTTTAGAGTG[G/A]TTATCACGCAAGAAATTCTCAGTACACGAG
>A01_1629133
AAGAAGCTTCACGAGCGGCGCGATGATTCT[T/C]GTCTCCGTCGCACGGAACGTTCTTGAAAGA
>A01_1629620
CTGTTATGTTTTGTTTGATTCTTGTTAGTA[G/T]TACCTGAACCCGAACCTGAACCTGAACCTG
>A01_1629739
TGTGTTTGTGATAATGTTATGCATCTGGCT[C/T]GGTGTTTGGTTACTCATAGGATGCGAGATA
>A01_1629778
GTTACTCATAGGATGCGAGATATTACTCTG[A/C]GCCTCGTCCTGCTCGTTGCCCGCCTTCTTA
>A01_1630351
GAGGATCGGCTCGTTGGCGGCGATGGGAGG[G/T]AGACCTAGGTACTCGTCGTCGCGGTCGTCG
>A01_1630453
AGAATTCTCGAGCTGCATCGTGATCTTGCG[G/A]AACGCGGCGGCGGGGATGATGGTGAAGAGG
>A01_1630690
TTCTTGTCGGAACGAGTAAGCTTCGTCGGC[T/C]GCTTTGGTTATCTGATCCGCTAGTTGGATT
>A01_1631006
AAAAGAAATATGCCACATTTTATAATTGCT[A/T]CTGGAAAAATACAATACAAAATTATCTTGT
>A01_1631391
ATATCACCCATACAATTTTTTTTCTATAAA[T/C]TAAAGTCTTTTCAAAGATTTAACATGATTA
>A01_1631425
AGTCTTTTCAAAGATTTAACATGATTACAA[T/A]TTAAGAAAGAGATTTTGGTATAAGAATATA
>A01_1631579
GATGTGGTATTAAGATATAAATACACTAGA[A/T]TTCTACCGGTTTTCGAATCAAATTTTCGAA
>A01_1631697
TTTTCAAATATCTTTGAAAATCGTTTAACA[G/A]CTATATCGGCCATGAGAGTGAATCAAAGGA
>A01_1632266
CTAGGATGTTTCCAAACTCTATTTTGGCAC[A/T]TGCAAATTAACATCTCTACTCATCATGATT
>A01_1632438
GATCACAACGCGTCAAAATTTGATTACACA[T/C]GAGCAAAAAAAACGAGATAATCTTAAACTG
>A01_1632554
GCCAACACCGCCACCACCGCGTCCTCTCTT[G/A]GATCCCTGATTGATCGAAGGAAAGCAGACA
>A01_1632811
CTTTGCGTCAACTAGATACTCAGGGATGTC[T/C]CTTAGATGCGGTGAAGGCGCAGTCTTGCTA
>A01_1633178
GACAGCATTTTCAGTCAACAAAGGGAAGGG[A/T]GTGATGATATCACTATCCTTGTCCTCTTCG
>A01_1633896
ACTAATATTACTACAATAAATAACTGGATT[T/G]CTCATGTCAATAGGTAACACAAAACTTTAC
>A01_1634294
ATCAGAACTGACATTTTGCAAACATGATTC[C/A]ACCATTCAAGACAACCTCTCAGAGGAAAAA
>A01_1634400
CTTGTGGTAGCAGACATAAGTAGGCATTGG[C/G]AACGTCTTGGAACTATTGACGTTACCGACC
>A01_1634865
TGTTAAAAAATAGATTAAAGTCGAACTTGT[T/A]ACACTAACCATATCAGAAACAGGCATGCTA
>A01_1635039
AGCAGGCTTCTTCTTCCTCCCAGAGTCTGA[A/G]AACAGCTTCTGAAGCAAGGGAAGAAGGTAA
>A01_1636089
ATTAATATTTTATATATTCGGGTATCTGTT[C/T]GATTCTCGGTTTGGTTTCGGTTTGGTTCGG
>A01_1636651
AAAAGTATTGAACTTTGAGCTCAAAAGGCT[C/A]AACTTTAGATCCATTTTTGAAGAATCTGGA
>A01_1636882
ATGTCTGTCTTGATATGTAGGGATTGAGTA[C/T]GCATTAGATTCGTTTTAAAAATCATAGTGG
>A01_1637600
TCTACTTTGCTTAAGCTTTTGGCCTAACTG[A/G]AAAATGTTGTTACAGGCATTATGCTGTCAA
>A01_1638692
AGCAGAGTTTCGGATAGTCAACTGCAGTGG[G/A]GAAGTTAGGTCCATACCTGCAAAAGATTTC
>A01_1639161
TCTCATGATGTGCATAGTGTATACCCCACT[G/A]TAGAGACCTTTCCACCCTCCCATGTATCAG
>A01_1639235
TCCTCGGTTATCTAGAAGTGGAAAACAAGA[C/T]TATGAGACAGTAAAACAAGGAACATCTGTT
>A01_1639626
CCGCCCTTATATTTTCATGTAGGTCACAGG[A/G]GAAGCAGAATATACTGATGATACCCCAGTG
>A01_1640136
CAGCAATATTATCAATCAAGGAGGCTATTA[A/C]TGCTAAAAGTTTCCATCCGAACACAGAGAA
>A01_1641233
AATCACACACTACTCACAGTCCCTTCAGCA[C/T]TGCACATTGCAGCAGCTCTGGAAAGAGCTG
>A01_1641448
AATTAGCAATCAAACTGTAAAGAATAAAGA[C/T]TTTTTTATACCATCCATTTTGTGGCTGTTA
>A01_1643566
CAAGGGATCATAACCCACAATAGCATCAAG[G/A]AGAATAACAGCATCCGAAACTGTCCTACAT
>A01_1643780
CCCGACCACCGAGTTCTGACTCGATGGACA[G/T]AGGATGGAACCATCGGTTTCAGTCCCAAGT
>A01_1646244
GCACATGAACCCGGGGATCACGCGGTGGAA[T/G]GCCGATCCCTTGAAGTGGAGCGGCTTTCCC
>A01_1646286
GAAGTGGAGCGGCTTTCCCTTCTTTCCGAC[G/T]CCTTTCTCGCCGGTGCAGAGGGCGCGGAAG
>A01_1646479
TTAGTAGTGGTGGTGATGCTTAGGGTTGTT[A/T]GCGATGGGTGCTTCATATATAGAGAGGATT
>A01_1646717
TTTTTTATATAGGTGGGCCGAGCCGAAAGC[A/T]GAAGCCCAGTATCTAATCATTATATAATTC
>A01_1647483
GTTTTTTGTTTTCATCACTTAATTTTTTTT[T/A]AAAAACCACCATTAGAGCATAACTCAATTT
>A01_1647597
TCAATTTTGAATACATATTCAAGAAATATT[A/G]GCACGGGAATATAATTTTGTACACTTGAAA
>A01_1647637
TATAATTTTGTACACTTGAAAACTTGCAAT[G/A]TATACTGTTTTTGTAACAAATGAATTATAA
>A01_1647693
TATAATTAGAATAAAATTTCAGTTTAAAAA[G/A]CAAAATAGAACTTTGAATGCTTTTTCTTTA
>A01_1649070
GTAGCTGATACGTCTACCCTTCGCCGTTTC[C/G]AAAGATTACTTGTTCGACTAGTGTGTGATA
>A01_1649167
CAGAGAGAAGAGATAGAGAGGGAAGAAGCT[T/C]GTTCGTTTCTTCTTCTTCGTTCCACGCTCG
>A01_1649868
GGCTTCACCGAGCGTGGGTAGGAGGTCTGG[T/A]TTCAACACTCCTCGGTCTGTTCATGGGTTT
>A01_1649910
TCGGTCTGTTCATGGGTTTGAGTCTCATCC[A/T]ATGGTGGGAGAGGCGTGGGATGCTTTGAGA
>A01_1650112
GTTGTCTTAGGTGTTTGTGAGAGACTTTGT[G/A]CCAAGTGCTTTGGCGTTCTTGATGAACGGA
>A01_1650955
GAGAATGGATTTCCGTTGGTTTGCGTTGGG[C/A]AATTGTATAGCCATATTGTCTTCCATGGCT
>A01_1651216
GTTTTCTACTGTATGCAAAAGCTAATCTGA[T/C]CTTTATGTTTCCTGGCACAGTGCTGCTGTG
>A01_1651268
GCTGCTGTGGCTACTGACGGCTGCTTGTAT[C/T]AAAACTGGTCGACCTCAAATAGCAAGACGA
>A01_1651799
ATCAAGGTTTCGAGCAACGATGCCTTCAAA[T/A]GTAACACCAGGTCCAAAAGCTAGAATCAGA
>A01_1651967
GAGAGCTCTTCTGCTTGGACTCAGCTTCTC[C/T]GGCGAGAGGTTAAGCCGCTTTTCCATTCGG
>A01_1652159
TCTCGACAGCGTGAAGTTTATCCCTTCTTC[T/C]GTTAGCTTCCCATCTATGGTCTTCTCAGTG
>A01_1652336
GCTCAAAGAGAGGCTTCTCAGAGATGGGGT[T/C]TGGATCGGATCCGATGATCATAGCTCCAGC
>A01_1652409
CAACGCGACCCCAACAAGATCATACGGTCT[G/A]TCTGCACTTGGAGGTTTGAAACCAATGATG
>A01_1652499
ACTCCCCGGATTGTTCTCGGCTATGTCTTT[C/G]GCTACACGGAGGCCTGCAACGCCACCAGAA
>A01_1652535
ACGGAGGCCTGCAACGCCACCAGAACAGCC[G/T]ACGAAGTAGAGCAGAACACGGTGTGTCTCG
>A01_1652865
TGTCTTGCCTATATAGTAGTCGAAACAGTC[A/C]AACAACCTCAGTTTTCAGAAGCTTATACAA
>A01_1654077
TCGCGCCGGAAAACGGAAAACTAGTCGTTC[A/G]TCGCCTCGTTTAGTCGTTAGAGCTTCTATC
>A01_1654719
GCAGCTGAGGAGTCTCAGTTTGCTGTTGCC[G/A]GTGTCAGCACTATTGCTAGTGAACATAGTT
>A01_1654931
TGTGGTGGTAGATGACGATACACATGCTCT[G/A]GAGAATAAATATAATGGTTTGGCCCAAAAG
>A01_1655212
CGTTGACAGTGTGGTACTTTCCTCGCAGTG[C/A]AAATCCATTACGATGATGCTTTAAAGTAAC
>A01_1656030
GTGGAGTTCTGCAACTGGTGCAAGAGAATG[G/C]TATGATGGCTGATTGCAAACTTTACACAAC
>A01_1656769
TGCAGGTCGAACGAGCTAAAGAAGTGTACA[C/A]GATGATCCATCAATATGGAATAAAGGGTAC
>A01_1657183
TGGAAGTGTGTGTTAGGAGTTAACTGTTTA[G/A]CACTTTAACTAAGAGAATTAATTTGAAGTG
>A01_1657786
AAGTGAAAGGTAACTTCTTCTTAAATTGAA[T/C]TATTTAGGCTTTGTTTGGATTAGTAATCAG
>A01_1657943
AGATGGAGTATCACCAAACTTCATCATGTG[C/T]AGATGCATAACAAGTAAGCTTTTGTATTTT
>A01_1658408
TCTTCACAAAAGCAGCATAACATATTCCCA[C/T]TAGTAGATGGGTTTGGAGAGTATGATCCTC
>A01_1658468
CGAGCATTTTCACTTCTTGAGGTAATGTTG[A/G]TAGCTTCATATAGATATTCATTACGTCCAC
>A01_1658542
TTATTTTTTTCATGATTTGCAGGAGGCTAC[C/T]TCTCTTGGAGTTCTTCCTTCTATGTCCTTC
>A01_1658782
TTGAAAAAAAAAAAATAACAGATCAATATC[A/T]CACTGTTTTAGCACTTTTTGGATTCCCACG
>A01_1659049
CTATCAGATCATCAACGTTAGGATAAAAAT[C/A]TTTTACAAATGGTTAGTTAGTTGGGAAGAT
>A01_1659143
AGGTCTGTAATTAAATCTCTTACCTGTTAT[C/A]TCATGTATGTTTCAGGTGCAAAGATACCTC
>A01_1659202
TCATATAAATTTGATAATTTCCATAGAAGA[A/G]AAGGAGATTACAACTCCTGAAGGAGAGAAG
>A01_1659399
AGACATTTCTGCCTTGTTGAGAAGGTTGGG[A/G]ATACCTTATCACAGAAAGGATGCTAAATTA
>A01_1659561
TAACCAAATCACTCGCCAGCAACGCAGCAT[C/T]CGGCTAGGGAACTTGTCACTTGAGTGAGAA
>A01_1659748
CAAGTTTTGCTTCCTGCATGGTTCTTCTTG[C/T]TGTCCACATGAGGATGTTGCATAGTGACAT
>A01_1660290
CTGCCACATGTCCTTTAGGGACATGATCCA[G/A]TGATGATGATGTTCGGTTTCTGCTTGCCAG
>A01_1660825
ACAAGTGGACAAGCACATGCAAAGAAGACA[C/A]CGAGCAACTTGTCACATTGGCTGAAATAAC
>A01_1662605
TTCTCTGCAAGGAATCGTTAATCCACCAAT[T/C]GGATGGTTGAAACCAAACTCTTCCTCTGCT
>A01_1664410
TATGTAAAAGCTTTCCATATTTATAATAAT[C/A]TTTTTCTTAACAGTACTGTTAGAAGCAGTA
>A01_1665434
TATTTGTAAAATGTGACTGCACATAATGTA[C/T]GTTTTTATATGATTTCCAATATAAAAGGAT
>A01_1666963
TCTATGAGCTTTTTTTGTTGATAACATATG[C/T]GGTTATAATGTTATATATAATCGATTAATT
>A01_1668675
CATTGAAGTTACTTCTCGTTTGAATTGAAT[T/C]TAAATACATAGTGCTAAAAGCCTAAAACTA
>A01_1668898
AATATTTAGTTCGTTTTAAGTTATTATATA[G/T]TACAAAGCAATATAAAAATCTGAATTTCTA
>A01_1669204
AATCTATATACATATAGGAAAAGTAAGCAA[G/A]TCGACATAGAAAAGAAACTTAAATTAATTT
>A01_1669629
TTCATTTGGTAAGTCTCACCCACGTAGACG[G/A]CCACATGACCCTTTGGGACATTATTAGTAC
>A01_1670142
ATACGAACGGCAAACATTTACAATCAACTT[C/G]TATGAGATTATTACTTTTGATAAAGACGTT
>A01_1670179
ATTATTACTTTTGATAAAGACGTTCCGTAG[A/G]TACACGAAAAATGTGTTCGGAAATTGGATG
>A01_1671511
CGTTTGACCTAAAAAAAAACTAATTGTTAT[C/T]GAAAGATCTTGTGACGGTCCATTCGTGGAT
>A01_1672240
TTTTTTAATATTCTAGTATATAATTACCAT[G/A]ATATTTAAAACATTTAATTAAATATATATT
>A01_1672536
GGACAGAATGTCTCTTCAGAACCAGTCAAG[C/T]CCGACTACCACTTGATCTTAGAAGATGGAC
>A01_1673620
CATTAGCTGGATACATAAACACTGACGCAT[T/A]TAATATGGATCTGATGGGTCCTGAATTAGC
>A01_1675980
TTTGTTGTGGTCCTGTGGATTAGACATTTA[G/A]ACCGGACCTTTGTGGTTGAACAGCATAAAC
>A01_1676284
TTGCCTTTAATGCTTTGTTCCAATTTAATA[G/A]TCCACTAGATTTTAACCCATAAAAGTGCAG
>A01_1676340
TGCAGAAATAGTTTTATTTAACAAAATCAA[T/C]ATGTCTTAACATTTTATTTTAGTGTATTTG
>A01_1676422
TATATTTTATTAAATATATAAATTATATAA[T/G]ATATTAATTATTTTTAAATTATTTCAACTT
>A01_1676813
TATTAAATAATTTAAAAATATTAATAAACA[G/T]CCATTAAAAAATTATGACCTAATGTTTTAT
>A01_1677003
AATATATGACTAAAGCCTAAAGGTTTAGGT[G/C]CAAGTAAATGTTTATGTTTTAAAAAAATTG
>A01_1677788
ATATTTTTCTTTCCGATGCATATATATTTT[T/C]CCCCCGCGGGTGTTATATTCAAATTACATA
>A01_1678143
TTATCAGTTTATTGATATTACAAGTGCAGT[G/A]TCTTAGGTAGATGAGACATCTACTGGAAGC
>A01_1678257
CTTTTTTTTTTTGTAAACTGCTTAATAGAC[A/C]TACAGCTTTTCTCATCTAATTATCATGTGG
>A01_1678321
AAGTTTCTCGTTGAGTTTTCTTTGTTCAAC[T/G]ACTTTTTATTCATGGGATACGGATTAACAG
>A01_1678541
CATATACTATTATATATGTATATATATATA[T/C]ACATATACATATATATTAGACTTATAATTC
>A01_1678669
GTTTTTCTACATTTTTTATTTGAGCAAAAT[A/G]ATCTACAAATTTCATAGTTAAAAATAATAT
>A01_1678908
ATTTCCGTTTTGCATTATTGTACTTGAGAC[C/T]CAGTTCAGACATCATGCTGTGAAGTGAACT
>A01_1679592
TCACAACCTTAAAAATATTACATTCGTGTA[A/T]ATAGTTTAGTTACGGAAACTATGACAGTTT
>A01_1679954
TAGATGCCTATCTATCATCCTCAGTAAAAT[T/G]TTATATAATATCTATCCGATATTGATTTGT
>A01_1680028
TAATATTAGTAGTGATGGATCGATGGTATA[C/T]AGTCCACCTAGCCGTTCGAAGATGTAACCG
>A01_1680161
AAAATATTATGGTCCAATGAAATCGATCTT[A/C]GTATATGTAATTTTTAGCTGACATGTACCT
>A01_1680222
GTTTGAATAGCTTCAGTGTTAAAATTTATA[T/C]TTTGTTAGTTATTAATATGTAATTTAATTA
>A01_1680303
AGTGACTAAATAAATCTAGCCATTTTTTGT[G/A]AAATGATGCAGTTTACTAGCTCGTATCTAT
>A01_1681236
GACATGGGTCTCACCATTCCTTGTGATGAA[C/A]TCGTCTTTCAGACCCTAACCTCAATGATCC
>A01_1681427
CCCATCTAGGGTTTTTTACGAGTTAATTTA[G/C]TCGTCTAACAAGAAAGAAACCCGTATGAGA
>A01_1681549
GATTCTGTGAGAGAAGTTGATTAATGCAAT[A/T]AAAAGTATTCCTGTTTATATTTTTTCTAGT
>A01_1684565
TAGAAGCTGGAGATTTTTTTTTGTTTGAGA[C/T]ATTTAAAGTGGGAAATTCTTTAACTGTTAA
>A01_1684868
TAAGTTTTACATTTAGGTGATATGGTGGAG[G/T]TACCACCTCTACCGTACCAATTAAATTATA
>A01_1684980
ATGCCCAACTCTGAGGAAAATAAACAAACG[C/T]TCTCGTATTTGATTACTAGCAAACCTAATA
>A01_1685109
GAAAATAGTATAAAATTTGCATAAAATCTA[C/A]AAAATATTAATTATATACAAGAATGATATT
>A01_1685176
CTATTTTGTGTGTATTGCTAATATGATGCT[A/G]ATAATCTATATTGTGTATGGTATGATAACT
>A01_1686137
ATAAACAAGATGTATTGTTTTGATTTATGT[T/C]TTTACTCCAATTTAGTTATATACGTATATG
>A01_1686253
ATCTTTCTTTGCTTTTGTTGTTTGTATTTT[C/A]TCTATCTTTTAAAGCTAATTTAAATAAATA
>A01_1686524
TTTAACCAATTTTTAAAATAATAAACAAAA[G/T]AAAATATCTTCAAATTTCTTTATTATTCCC
>A01_1686618
TGAAAATAGCCAAAAACAAAATAAAAAAAG[G/A]GATTTTTGACTAAATCCAAAACATCTAAAT
>A01_1686651
TTTTTGACTAAATCCAAAACATCTAAATCT[G/A]AAACTGAGGATCTCTAACCAAACACAACCT
>A01_1686883
TAGAGAGATTGAAAAAATTCTCTCTAACCA[A/T]AGCATTTCAATTCAAATCCGGTTTGCAAAT
>A01_1686915
GCATTTCAATTCAAATCCGGTTTGCAAATT[C/A]AATCGACTCCGGTTTAGCCTTTAGCATACA
>A01_1687225
TTCGCGCAGACGACGTATCTCCGCCGATTC[T/G]CGCCGACGGAAACTGCCACGTGGCCTGGAG
>A01_1687484
CAAGTTTTTGTGATAGTTTTGGCAAGCAGA[G/A]GAATGTTGAGGTGGGAGCGTGTGATATTTA
>A01_1687866
CAAAACAAATATTTTGATTCATTCAAGTTT[A/T]TTTGTTGTATTTAGTTTACTTCCTTAACAT
>A01_1689642
AAGCCCATATCCTTTAATTTTGGAAATTAA[C/A]ATTGTTTTCTTTAAACATTTGTCAGGCCTT
>A01_1689715
TGGACATGTTTGCTGGACAAAATCGCTTTT[A/T]ATGGTAATGAATTAGGAGAATACATTGTAT
>A01_1690408
CCTTAAACCCTCTCCCTCTCCTCTCCCCGC[C/T]TCCCTCTCTTCCTCCTCTCCTTCCCTTCCG
>A01_1690438
CTCCCTCTCTTCCTCCTCTCCTTCCCTTCC[G/T]GTTAAAGTCTCTTCCTCGGGAAACGCAAAC
>A01_1690525
CTACGACGAGAAGCCTCGTGAGGAGTGCGG[C/T]GTTGTCGGAATCTACGGAGACTCGGAAGCC
>A01_1690681
AATAACAGGCGTCGGTCTTGTCTCCGAGGT[C/T]TTCAACGAGTCCAAACTCGACCAGCTACCA
>A01_1690918
CACCAGCTCTGACACCGAGGTTGTCCTTCA[C/T]TTGATAGCTATCTCCAAAGCTAGACCGTTC
>A01_1691647
TGCCAAAGAGGTTCACATGAGGATCGCGAG[T/C]CCTCCTATCGTTGCTTCTTGTTACTACGGT
>A01_1692030
ATATGATGACGAAAATCTTGTTGAATTTTT[C/G]ATCCATTTGACCTAATTGCTGCATGTTTAC
>A01_1692238
GTTTACGTGGACTAAACACTTCCACGTCAC[C/T]GCTGATTATGCAAATTACAGATATACCCTC
>A01_1692301
AAACATTTCCAGTGGATATTGTTGGTCTCG[T/C]TAACTACTTCCTTCTCCGACCGATAAACAC
>A01_1692723
TCGAGGTCTCCAATGATTTGCAGGTAAAGA[C/A]AACTTAATTCTCCACTCCTGCTTTGAGATT
>A01_1693114
ATCGTGATTTCAAGTTGTCTGTCTGTTGGT[C/T]TCATGTTTGTAGAAAGCCTATACAAAATAT
>A01_1693206
ATTACATAGTCATTACCTAGTTGATTATTC[T/C]TTGAGAAACCATAACCGGATATTGCTAGTT
>A01_1694098
AAGAACAAGCTACGTTGCTCCCTTCCACCA[T/C]TCATCTGAAAGAAACAAAAAAAATTAAATA
>A01_1694423
TCGTGAATCGTGATCTTCGTATGAGATTTG[C/T]ATAATTGCTTGAGAATCGCCTCGTAAACTA
>A01_1694660
GAGTGGTGTTGGTGTGGCTTCCATGGGAGT[G/C]ATGAGGCCCGAGCTGGTGATGAAGTCCATC
>A01_1695041
GATTCTTATCCTTATTTTCGCAGAAGCGCT[C/T]GCTCTTTACGGGCTTATTGTTGGAATCATC
>A01_1695363
AAAAAGCTTTGAGGAGCTTGGTATGTTTCT[A/G]TATTCTTGTGTTGTCCTGAGGAAGTTTAAA
>A01_1696326
TAATTATATTACCATAATAATAATAATAGT[A/G]CAGATTTTTATTAATTAATTAATCAATATT
>A01_1696432
AACGTTTCGTTTAGTTTGTTTTACTAAAAC[C/T]TTTTTATAAATTTTAGTTTAATTATGTGAA
>A01_1696567
AATGTATTACATTTATTGTCACTTAATTTT[C/T]TACTCCATATAATTATTTTACTAAATAAGA
>A01_1696648
ATTTATCCAAACACATAGCAATAACTCTTT[C/T]TATTAGTTTATAAAATCAGTTAGACATGAA
>A01_1696929
GGACCTCTGTTAGGGCATTATTAGCATTCA[T/G]CAATAAAACCATGTTCATTCTATCTCTATA
>A01_1697013
ATACAAGTTTGTTTTAGTTTATATATGTTC[C/T]TATAGTAGATTTTTCTTAAGTAAAATATAA
>A01_1697349
TAGTGGTATGAAAGAGCAGTCATGTACGAT[C/T]GCCATAAGAGGAGTGGTGGACATGAGCCCT
>A01_1698038
AGTCTTCATAAATTTAAATATAAAATAATG[T/C]AACAAGAAAATAAATGTCACGAATTGCCAT
>A01_1698538
ATTGACTTTGTTGGTGATATATGCCTAGAC[A/G]TGTTTGGTTATAAACCACTTTTACAAAATT
>A01_1698569
TGTTTGGTTATAAACCACTTTTACAAAATT[T/G]AAATTGAAGAAACAGTAGCTTTATATGTTG
>A01_1698734
TTACTTTTCCCTCCCTTATTATATAAACAA[G/C]TAGAGTGTAATCTGCCTTCATCATCCTCAT
>A01_1699310
TTACCAAGGCGTTTTTCCGGTTAAATGCAA[T/C]CAGGACCGGTTCATTGTGGAGGATATCGTG
>A01_1700041
TCTACATAAAATTTAAGGGCATGTTTAAAA[A/G]GTACTCTTTCTATTGATAAGATAATCTTGA
>A01_1700124
TGAAAAATTTCACTAATAACTTAACAAATA[T/C]TTTGTTAATTCGTAAGAATTTTATGTATTT
>A01_1700223
AGCCATGTCAAACCAGTTAATCCGGTGATC[T/C]AATAATTTGATTTAGATTTTTAAAAATATC
>A01_1700426
ACATTTCTACAAAATTTTGATAGAGAAAAT[A/G]ATAGATATAAAATAATTAACAACTGTAAAT
>A01_1700477
AACTGTAAATATGTCTTGATCATATTACTC[A/C]TTTTTATAGCTTAATTAATTTTATTATAAT
>A01_1703045
TGCAATGCAAATTATATCCATCTTTAAAAA[T/A]TATATTTGAAGATTCTGAGAATCATCTTAG
>A01_1703087
ATTCTGAGAATCATCTTAGTGATGACACGT[G/A]GAGACACTTAAAAGTTGTAATGTTCCAAGA
>A01_1703131
GTTGTAATGTTCCAAGATTAATATATAGAG[G/T]ATTCTTAAGACTTCTTTGCTATGATCATAA
>A01_1703182
ATGATCATAATTTAAAATTTTATAATCAAC[T/A]AATTGCAATGCAAATTATATCCATCTTTAA
>A01_1703254
AATATTTTTTTTTCCTTTTTATTTGATTTT[G/T]TTGTTGTCTCTTATTGCTTATTTTTTTTAA
>A01_1703330
TACAAAATATACTATTCCTAATCCAAAATC[A/C]CTATCAATATCATTGTGATTACTTTCTCCT
>A01_1704024
CCATAAGCTCGACCAAAAGCCCGGGGCTCG[C/T]GGGGTCTTGTCTGATTTAACGTGTGACAGT
>A01_1704536
GCGATCAATAACTTTGGCTTTTAGCACTTC[G/C]ACGATGACGGCTTTGACTACCTATGAGTGT
>A01_1704615
GTTTGTTTTTGCAGTTTAATTTTCATTTTA[G/A]GTTTCTTCAATAAATTATTGGAATAATCAA
>A01_1705206
TGATTTCTTCTACTCATGCGGATAAGGGAC[A/T]AGGACGACCATCTCTAGTTGGAATACACAT
>A01_1705511
TATATATATGTTTAGTTTGTTCTAATTTAT[A/T]TATGTTTCTATAGTAGAGGTTTTTCTATTT
>A01_1705744
GTTCTAAAAGACCACAAGAGTCTTACAAAA[C/A]TTTAATTTAATTGGTTTTAATAAACTGAAT
>A01_1707817
GGTGAAAAGGGAAAGTTTGGATTGACAAGT[G/A]CTCAGATTGTTTGTGTCGTGGCGAAGCTTA
>A01_1707933
GATTCCAACGACTTCTTTGCTATCTGATGG[T/C]GTCTCCGAAGCTGCTCTGATTTACTGTGAG
>A01_1708099
ACACTCGAGGAGTATGCTGAAGCTGTTGTA[A/G]CTTCCATCAGGTACCCAGCAAAGTTTTCAA
>A01_1708607
CAAAAATAACTATATATTGTAATATTTTAC[T/G]GTAATTAATTATGATAATATTTTGCAGGTA
>A01_1708871
TGTACGTGGACCAGCTGAAACAGAGATGTG[T/C]TGAAGGTTTCAAAGATGGTGTTTTGAACAT
>A01_1709285
GCGGGCTAAGCGTTGTCCGTGTCTCGCAGA[G/A]CGATGGACCACATAGTTTTGTAGTGACCAG
>A01_1709340
GACCAGAGCCGTGCCTGGTCAGTCCTCTTC[C/T]GATGTTCTCCGAGCAGTGCAGCATGAGCCT
>A01_1709425
CACAGAGCAGAGGAAGTAATGCATACCAAA[G/A]GAGGTGGTGAAGAAAAAGAAGAAGATGAGT
>A01_1709526
CATGCCGTATCTCGCGACCGAGGAGGGCAT[C/G]AATGAGTAACTCTCTTTCAACTGCGATCAA
>A01_1709562
GTAACTCTCTTTCAACTGCGATCAATAACC[A/T]CGGCTTTTAATACTGAGGCGACAACCTATA
>A01_1709767
ATTTTTGTATCTTATTTTATTTATTTTCAA[G/T]TTAGTTAGCAATTTATCAAAAGAGGAGACA
>A01_1709802
TTAGCAATTTATCAAAAGAGGAGACAAAAC[A/C]AACAAACAATGTGTGAGCCAGCCATGGTAT
>A01_1709966
GTAATATAAACCAAGTTGGAAACAAGAGTG[G/T]CTTACTGGAACGAAACACCTTTGAAAACTA
>A01_1710295
GACCGTAGTTGTACACAATCTCAATCTGCA[T/A]CAGCCACACAAGAAGATAAGAACTTGTGAA
>A01_1711545
GGCCCCAAACCAATACACTGTAAAAAGTAT[G/A]CTCCGTTGCCGGGACTCGAACCCGGGTCTC
>A01_1712037
CAGATTATATAAAGTAAGAACTTGAAGTTA[T/A]AAGATCAAAGTCAGTATATTATGTGTGCAC
>A01_1712169
CGTTTTGTGTTGCTTTGCCAAGGAGAATCA[C/T]TTTACTATTTAGATGAGATAGAAAATCTCT
>A01_1712212
ATGAGATAGAAAATCTCTGGTCATGATAGA[G/T]GATATACAAAATATAACTATAAAGTATTAG
>A01_1712710
GAACCGAACTCCACATGCGTTACATAAGGT[C/T]TTTGGACCGACCGGACCGGTTCTCCACTGA
>A01_1712889
GCCAGACCCTGTCGCCGGTTAAGCTGTTCC[T/G]AGGCCGTTTGGTTCTTGGTTTAACCGGAAC
>A01_1713159
AGTTGATCAAAAATGCAAGGCTGTGAACTA[T/G]TGTTACAACAATCTTGTTCTTGTTCTTCTT
>A01_1713305
AGAAGAAGTTCTGCTTAGTTCCTCAGACAC[G/A]ATCACTTGATGTTTGATAGCTTCTCCTCTT
>A01_1713479
TTACTTCTCAATATTACAACAACCATGAAC[C/T]ATACATATAACATAGCAAAAAAGTAGCTAA
>A01_1713660
AAAAGCTGAGAGAAGGCGAAGAAACAGAGG[G/A]GGAGAGATAGATAGATAAATAAGCAAAGTA
>A01_1713762
AAAGGTGAAACAGAGACTTTGTGTTTTGTG[T/G]GTGATGTGCTTCCAATTCCTAAAGTTAAAG
>A01_1715018
CTTCCTTTAACAATCTTTTTTTTTATAAAA[T/A]AATACATGTCATTATAAAGTATTTTCCTTT
>A01_1715483
TTCCTCTTACTCTACTCCATTTGCATCATC[G/A]CCCTTTTTCTGCTTTTTTGTTTAGTATGTT
>A01_1716610
CCTGCCCTGGACATCTTCAGCTCTGAGACG[A/G]ATCTTCCTGTAAGAGTGATCCTCATCACCT
>A01_1717449
GGGCCTTAATAGTCCAGTACACTAACTTTT[G/A]GAAACTTCCTTCTGAAACAGAGACTTTACT
>A01_1717978
TTGATTATCTTGGTTTTATAGATATTAGCA[C/A]CTGAATGTAGAAATGATGTAGCCACGGAGA
>A01_1718172
TGTGTTCAAGCAATTTGGAGGAGGAGGACA[C/T]GGCTCTGGTTTATCGGATAATGCTGAGCTT
>A01_1718217
GGATAATGCTGAGCTTCATCAGCATCAGAA[A/G]CTTGAGAAGCTTTACATATCCACCCGTGCT
>A01_1719153
ACAAGGCCATCCTGACATCTTGACGAAACT[A/G]GAATCTGCAGAAGCGAAACTTCAAGACCTA
>A01_1721470
ACAATGCAAGTGTTCCCATCGCCACAATCT[G/A]ATAAAAATAAAATATATTCAATATCAATGC
>A01_1721546
ATTCAAACATCTCAACGAGATCTTTTAAAG[T/C]AAAGGTAACATTATTATCTAACCTGAGGGA
>A01_1721752
TGGCATTTTTATAAGATTTAAAAAAGAGAT[C/A]TGTGTAGATGAGAGCTTGAGAGTGAGATGT
>A01_1721843
CCAAATCTCACGAGGCCAAAACATGCGCGG[T/C]TTTGGTATCTCATTAATGTCTTCAAGGTAA
>A01_1721940
CAGTTTCTTTTAACCAAAATATTACAAAAA[T/G]ATATAAAAAAAAATGTAGTGTTACAAAAAG
>A01_1722480
TCAAGTTCCAGAAAAGCTGCAGAAACATGG[T/G]GAAACTGGTCCATTAGAACCTTGTACTCCT
>A01_1722511
GAAACTGGTCCATTAGAACCTTGTACTCCT[T/C]TGTACCACCTAAAATCGATTTAAGAGTAGA
>A01_1722561
TTAAGAGTAGATTAAGTAAAAAATAAACAT[C/T]TGCAACTGAAAAATATTAAGATGTGTAAGA
>A01_1722593
GCAACTGAAAAATATTAAGATGTGTAAGAG[G/T]CTCTTCTTACTTACATGTAAAATGCCAGTC
>A01_1722998
TACGTACGGCGTCGCGAAGCTCGGTGCCTA[A/G]TTGTTGAATAACAAGAGAGAAGCTTCTAGA
>A01_1723269
AAAGTTTATGTAATGAAAAATGTAAGACTC[C/G]TAACGTGCCACGGTGATACATGTATTATTG
>A01_1723333
CCAACTATGTTCTGTTTTGGCATTTAAAAA[G/A]GCTTTGCTTGCCGCGTGCCTCACGCGAAAC
>A01_1724509
GAATAAAAATGGAACCTACGAAGAATCACA[C/A]TGTCCACACTGATCACTCAGTTTGCTCTGA
>A01_1724752
AACATAAGATTTTCTGAGCAAGAGAGAAAA[G/T]GATTCATCAGAAACCCAGCCAAAAATATAA
>A01_1724972
TGTCGACCTATGTAGATTAAAATAAAATAC[T/A]AATTCTATTATCCTCTTCTTAGAGCAGAGC
>A01_1726232
TTTAGAGATTCTAAATGAAACTGAGAGCAA[C/G]GAAGATGATTGTATGACAAACCTCCTGGCA
>A01_1726425
AACGTGAAACAACATGAAAAAAAAAAACTA[T/C]AAGCCAGAACAGAAGTGTGAGGGAAAACAT
>A01_1726560
CCTTCGTACCACCTATAATTAAAAAAAAAA[A/G]AGAGTAAAATCTGTAAGTTAAACAGTAAAA
>A01_1727802
CTTGTGGAGCATTGAGTAGCAGAAACCCCA[G/A]TGTGGCTCAGGCGGGATCTGCTTCTCCGCT
>A01_1728128
TCTGATTCGTCCAGGGAATATTCTAATTTA[C/G]GATTTTTTTTTAAATGGTTTAGTTTATTCA
>A01_1729100
TGACGACGACGCTTCCTTTGTCATCTCTCC[G/A]CCGCCTCAGACTCTCCCTGTGACTGACGTT
>A01_1729681
ATGTGTAAATGGTAGTTCAATTGCTTTGTC[A/C]TTTGATTCTTAAGTAAATCTGATTCCTCTG
>A01_1729715
GATTCTTAAGTAAATCTGATTCCTCTGAAA[C/A]TTTCATTGTACATGAATCGCATCTTTTATC
>A01_1729811
ATGTTGGATTCAAATGGATAATCTGAGTGA[A/T]GGTTATCTAATCATTATGTTTGGTGGTGGT
>A01_1732857
TCATATAAAACATTTATAATTCATTAAAAG[C/A]AATTTGAGTAGATTTATCTATTATTTAATA
>A01_1733183
TTGTAGTGATGAAAAGTAACATGCATTTTC[A/C]CCAATTTCACACCTCAAAGACTATAGAATC
>A01_1733284
GCAGTGTTAGTCTTTAGGTATATATATATC[A/G]TACATCTCACAAAGTCGACATCTATATAGT
>A01_1733346
GCTCCATAATATGAATCATGATCAGTTGGG[G/A]ATAAGCTTGAAAGGAGGCCTGACGAGCCTT
>A01_1734978
ACTCCGCTTTATATAAAAAATAACCTTTAG[A/T]GGTTATTTTGTGTGTTAATAATGAGATTGC
>A01_1735012
TATTTTGTGTGTTAATAATGAGATTGCACT[T/A]GTTATAAAAACTTTAAAATGGCACTATTTG
>A01_1735618
TGATTCGTCACTATAATAAATTCTCGACGT[A/G]TTTTCTTATGGTTTCACTTAAAGTAGGATG
>A01_1735753
AACTAGTAAGTATGAATGCACATCCTTTAA[G/T]AGGAACACACAACAAACCCTGTTTATTACT
>A01_1735903
CCCAAGCTAGTGGCTGGATTATTTAATATG[A/G]GTAGCACTAGCTTCATTGTTTAATTTGGAG
>A01_1736117
TATCGAAAGTTTCAATCTAGCTTTTCTTGG[A/T]ACGCAAGTTTCGAGACTAATGCACAATCCA
>A01_1736186
AATGACTAAGGATGTGATTCAAAGAAGATG[T/A]TATTGAGACGAAAATTTTCAGATTGCTACT
>A01_1737262
TTTTGGAGGGTTTTGTTTCCTCCTTTTCTT[T/A]AATCCTAAAGCTTTTTCTTCATTCCTTCCT
>A01_1737722
AGATCGCCGGCAATTATTAAAATTTCGATC[A/G]ACGGAAAAAAATAGAACGGTGAGAAGACAC
>A01_1737809
ATTGATTATGAACTCTACTCTTCACATTGA[T/C]TCTAACTCCACAAAACGATATATTTCTTTT
>A01_1737901
TTGTTGTACGTATTACTAGCATGGTATTGT[A/T]TACATGAACCAACTGATTCTCATTTATGTT
>A01_1737934
CATGAACCAACTGATTCTCATTTATGTTTC[G/T]TCAAATAGATCTAAGAGAAAGAATGTTAAT
>A01_1738254
GAGAGAGTTCATACTTGTACAAAATGTTTT[C/T]TTTTTAATATAAACACAATAAAATTAATGC
>A01_1738320
GCCTACAACATACATGCGTAATGTTCACTC[T/C]CATTTGTGTACACTTTAGTTGTATTCGTCA
>A01_1738860
TTCTCCATTATCAGTCACGATGTAATATAG[C/T]CATTCTTTTTATAGTGTACTGGTGTATGGC
>A01_1738898
TTTATAGTGTACTGGTGTATGGCTCAATTG[G/A]TGATATATCGAACTTTGAAATTAAAAAAAA
>A01_1739078
ATTCACTAGAGATAAGTTTAAAAATAAATA[T/C]TTTACAAGAATACGCCATATACGCGACAAC
>A01_1739179
CTGTGTTTTGTATTTTTGCGATGATTAAAA[G/A]AAAACAAATTTCTTCAATTTCACCTATTCA
>A01_1739271
CATTCAGTATTAGCCTAACAACGCTCATAA[C/T]ATCTAGCTATAGCTTCGTCAAATTTATAGC
>A01_1739654
TTCTAGAAGGCAGGAGCGTACAACTAAAAA[T/A]ACATGTATTAGACAATACTATACATAGTGC
>A01_1739862
AAGAAAACACTTTGTACTCATGCGGCAACA[T/G]AGTCTTTATTACAAACACACTCATAAAGAT
>A01_1739942
AAAGACGGAACAAAGCACAACAAGAAAATG[G/A]AATACTACTAGAACAATCAAACAACATACC
>A01_1740146
GTTCATCATATGAAACATGTTCATATTCAT[C/T]TGATTCACGAGGAAGTCATCTGACTCTGGA
>A01_1740478
TCCTCTTACGTTTCCTCTGCTCCATGAGAT[T/A]CTCCTCTGACCCTGAAGACGTTTGAATCGT
>A01_1741131
TTTATAGAAAGAAAATTTCAAGAAAAGCGT[T/C]TGAGTGTTTGTGCAACTTGACAAGAAGCTA
>A01_1742266
TGTTAAAATGTTTTATTTTCTTACACATAA[A/G]GATGGCTGGTAAAAGCTCACAAAAAAACTA
>A01_1743208
TAGAGGTTACAAACACAAAGGAATCAGTTC[T/G]TAGAGTAAATATGAGTACAACATGTGTAAG
>A01_1743301
TGAGGTCGGGAAGAGAAGTCTCCAGACTCA[A/G]CACAGCTGTTTTATTTTCTTATTCTTCTCA
>A01_1743368
ATTTCAAAAATGTATACGTATTAATTAATT[G/A]TTCAAATGCTAGGATGGCAGGTTCGCAAAC
>A01_1744317
CAGACTTGACAAACGTCTCTCCGAAATCCT[G/A]AAAATTATCTGAGGAAGTACATGTGTGTCC
>A01_1745781
CATACGTTTCACCATCAACATGTACTCTGA[A/G]CTCGAGACGGGAGCTGCAAATTGAGCTTGA
>A01_1745829
AAATTGAGCTTGATTCTGCTTAGGCATAGC[C/T]TCGTCATAACAAACTGAGTTTCCATATAAA
>A01_1745937
TGCAACAATTCCCATCACAAAGGCCATGAC[T/C]CCTCCCACAAGTAACCCATCCCCTTTCTTC
>A01_1745974
ACAAGTAACCCATCCCCTTTCTTCGGTGCC[C/T]CCTTCCTCACGTAGCACTCCAACCCTAGAG
>A01_1746117
GACAGGAAAATTTTCGATTTTCTGAGTTTT[C/T]GTAGGCCACTCCATCATGGACTTGTCAATG
>A01_1746415
TTTATAGCCATCTGATTCCAAATTAAAATA[C/T]GTTTTTGTATGTATAAGATTTTCAAGAAAT
>A01_1746832
ACCAGCATTGATGATGAACATCCGGTTCAA[T/C]GTCTACAAGAAAATCCCGAACTCAACAACT
>A01_1747148
GTCAAGAATAGTTGTGCTCTGGTCAATGTG[T/C]TTTTTGGCAGCGACAGAACAAGCAGGGAAC
>A01_1747241
ATGATATTTCACGTACCGGTCCATTGTTGT[T/C]ACTTGAAGCAGCTTGTTAGCATCGATTTGA
>A01_1747634
TTCTTAAAAATTCATTCAAAAATTAATATA[C/A]AATATTCTGGATGATTCATTTTTTCTGATT
>A01_1747669
TTCTGGATGATTCATTTTTTCTGATTATGA[C/T]AACAATATCATATAAGATGGATCATGAATT
>A01_1747864
GGTTGACTAACAGCGCCTAGAAAGTTAAAA[T/C]TATGCTAACAAAATTTGTTACCATATTATA
>A01_1747920
TTATATTTCTAGTTGGCGTTTACGTCTTTT[T/C]CCCGTAATAAACCGATTATTCTAAATAACT
>A01_1748093
AAAAATAAGTATGGGAATCTAATATTCGTA[A/T]AATGATCCAGATATGGTTAATAGTTATATC
>A01_1748759
AATATTGTCAAGATCATTTAAAAAGAAGTT[C/T]GGATCAAATTGTATAAGAAATGTGAGATGA
>A01_1749337
ACAGAAAATGTTTGTTTTTTTTCTTAATTA[G/T]AAAACAAAAATATTTAACAATAACAAAGAA
>A01_1750788
TACCGACCTCAAGTTCTTCAAGGAGTTAAC[A/T]CTGACCACTTCTGATTCCTCCAAGAAGAAC
>A01_1751875
CAAGAGAGTATCTTGATGGGTAAAACTTTA[C/A]TCTATACTTTTATTTAGAAAAATTGAAACT
>A01_1752067
CTATTATTTCATTAACATGTTTCTCTGTTT[C/A]AGCCGTTAACCTCTCTTTCTACAGGTACAC
>A01_1752435
AAGAGAGATTATTTTTCTTCTTCTATTGAT[A/G]TTTGAGTTGATATTATGCAGATCTTGTTCC
>A01_1752484
AGATCTTGTTCCTGGTGACTTCATCCATGT[G/T]ATTGGTGATGCTCATGTTTACAAAAACCAT
>A01_1752517
TGGTGATGCTCATGTTTACAAAAACCATGT[C/T]AGGCCTCTGCAAGAGCAACTTGAGAACCCA
>A01_1754665
TAATATAAGAACTAAAAGTATTCGTAACTA[A/T]TTTTTCCAGTAATCAACTAATCACATGTTA
>A01_1754818
GATTCTATAGATTTGCATCAACCTTTTTTC[T/C]CATCCGATCGAAGTATATATTGTCTCTTTT
>A01_1755059
TATTTGTTTATATTACTAGCAGAGTAAATA[G/C]CGTGTTACACCAATGAGAGAAAAAAAAAGT
>A01_1755338
AAGAAAAGTGTGATTTCTTAGCTAATAGGG[A/G]GATACCTCTCTTTTTCATTCAGTATATAGA
>A01_1755661
CAATTCCTTCCTCTATAATGTATTTTATTC[A/C]TTTTTTATCCACAACCCTTTAGAATGCTAT
>A01_1755791
CCAACCAATACATCGAATATTCGATACTCT[A/G]CTAGTGTAACTAACCACGTTCGCTATATCA
>A01_1755985
GAGCCGTAAAATTCAAAAACAATTGTCTAT[A/G]TAAAATCACCACGAGATATTTATTCCATTC
>A01_1756054
TACATCAAGCAAACTTAATTCTGAATTCAC[T/C]ATATATTTAAGGGTTTAATTCATTAGTACT
>A01_1756091
TTAAGGGTTTAATTCATTAGTACTACAAAA[T/C]AAATGTGCATGCAATCCACCATATTTATAA
>A01_1757858
ATCACGTATTTAAATTACGATTAGAAATCA[A/G]ATTTAACATCCAATACCATTCTTTAATGTA
>A01_1758070
TAAACTGTTCATTGCTCATTGCATCTTCTG[G/A]TTTCTTAGCTCTCACCACTACCTTCTTGTC
>A01_1758141
ACCTTCAAATGCTTCTCCGAGTCATACCTC[C/T]TCATGATGTTCCCAACATGCGGGTGAACCG
>A01_1758300
GTCTTCTTCTCATTCTTGTAAAGAAGTTCT[A/T]GGTAAAGATCGTTGCTCTCCGCTTCTGTTG
>A01_1758512
GGAGATCAAGATTGTAAGAAGAATCAGTTC[G/C]ATCAGTCTGAATAAGTTGGTGAAAGCTGGT
>A01_1758556
AGTTGGTGAAAGCTGGTAAGTTAAAGATTC[C/T]TCTAGGTTTCTCCATCTTAAAGTGTTGAAA
>A01_1758672
AACTATGGGACTTAGATCACTCCAAAGAAG[T/A]TAGAAGCAGAGAGTTTTGCCAACAAGAGAA
>A01_1758703
TAGAAGCAGAGAGTTTTGCCAACAAGAGAA[G/A]AAACAGAGGAAGAAGAACAATAGTCATGGT
>A01_1759186
ATGTGAGGTTCTAAGTTAATTTTGGTTACA[A/C]AGGTTTAGATGGGATGTGAAGATTTTTTCT
>A01_1759655
TGTCTACAGATAATATGGAAAATCATCGTA[T/C]GTTACATTACGTACACGCGAGACTGTAGAC
>A01_1760575
TAAAATAGATATCCTACCTATAATCTATTT[A/T]AAGCATTCATCTTGTACTTGTTTGAAAACT
>A01_1764134
TTCTAAAATCATATGGTGGTTAGCTAAGTA[G/A]ATGAAACTCTCCAATTTCTTTAGATTGTCC
>A01_1764246
ATTTTAGGCGTTTATGAAACTTTTTTAACA[G/T]AAATTTTTAAAAATGAGAAGGTTGGAAGTC
>A01_1764334
AACAAGTTGTATACGTATATTGGTTCTTGC[T/A]AAATAACTTTTATCTGATTCTACAGTATTC
>A01_1764454
TTTAACTTAATCCAACCAGTGTAGTGTAAC[G/A]TGACGAAATTTTTGGATATCTATTGGACTA
>A01_1764490
AAATTTTTGGATATCTATTGGACTAGTGTA[T/G]AAATACTTATTGCTGACCAGCAACAATCCC
>A01_1764752
AACATGTGATCCCTTCCCTATTTGGTTACA[A/T]TCCTAGAGAAGGGTATCAAGAAACTCGCTC
>A01_1764856
CTCCACCACAAGACTCATCAATCTCAAAGT[G/A]CGTGTGATGTCCTTTAATAAAAAAAGAGTA
>A01_1765046
TCTCAAGAAGTTGACTCTCAGTAACAAAAG[C/T]CTTCACAAGCTTCTTCTCAATCTTCCCTTC
>A01_1765113
CTCAACAAGATCATTCATAGAACACACGTT[T/C]CCACACGGCCTAAGGTACAACGTCTTGTTA
>A01_1765143
TCCACACGGCCTAAGGTACAACGTCTTGTT[A/C]AGTGTTCTAGGATCATCAATCGTTTTGATC
>A01_1765316
CCCCATCTCCAAAGACAGTGACTTTATCCA[T/C]CGGAGGAGATTGAAGACCCGGTTGGACTAG
>A01_1766051
TACACTTAGAAGCAGTACTTGAACTCAAAG[A/C]CGTTGACTTTCTTTGTAGTACTCAAAACTC
>A01_1767395
TATAAAGATTCTGCACATCAGAGTCCCACA[T/G]AGTAGCAGATTGACCATTCTGTAACATAAC
>A01_1767630
AATTCACCATCATATGAGGTGGCATCACAG[A/T]GTTTGGTAAGTTCATCATTGGAGCTGAGAC
>A01_1767879
GTTACAAATTATCAAATAATATTTCTAGTC[G/T]TACAAGATACATAGGAAATGAATTGCGAAC
>A01_1767925
AAATGAATTGCGAACCTCGACTTGTCGCTG[G/A]AGAGACTGAACATAGTTAATGATCTCATCA
>A01_1767985
AAGCATCCCTGCTTTGCCTGTAATCTTTTC[G/A]CATCCAGGAACCAAATCTTGTAGAAACTTC
>A01_1768729
CCCTTTGGCGCTCTAAGACAGACATGTCGG[C/T]ACAGTTGAGGAAAAGCTCAGCTTCTGTAGC
>A01_1768782
TCTGTAGCTTCTCCGTTCATCATCATCATC[T/A]TCTTCTACTTTGGAGTGGTAGAGAAACAGA
>A01_1769304
GATATTTCTCTTTAATTTGTTTTTATTCTT[A/G]AGATTTGTAATCGAAACTTGTAGTTCGTTT
>A01_1769713
TTGGCTAATACTGAGACGGCGCAAGAGAGG[C/G]TGCCACGTGATAGCCATGCTCTTTGAATGC
>A01_1769786
AGACCCATCACATAAATTACTCTCACAAAG[T/C]TAGCTTTAGATCACTTTCACCGAAAACCAG
>A01_1770622
GTATCCACTCGAAAAGAGATACATTTTATA[A/G]TGTAAGAAAAATTCAATGCAAAATTTTACA
>A01_1772631
AATCTAGTACTCCCGATAAGGTTTTTTTTA[G/A]AATTTTCATACTTATTAACAATATAATAAA
>A01_1772681
AATATAATAAATATTTACTATTTAATTTAT[T/C]ATTTATTTTAATACACTTTTTAATAATTAT
>A01_1772730
TTTAATAATTATTGACTAATAAAATTTAAT[C/T]AATTCAGATATTTACAATTAATTTTTCAAA
>A01_1772880
GTAACTAATTTTTATTTTTATTTTACAAAA[A/G]GTGGTTTGATTTAGTCTTTTAAATGCTTAA
>A01_1773026
TGGATCAAATACTTCAAGCGAAGAAAATGA[T/A]TGACTCGACTTATGATATTAGAGTGTTGGA
>A01_1773655
TCTAGCGAATTGATCACAGCTCTGTCTCCA[G/T]CATGAATACAACAATGGTCAATAGTAATGC
>A01_1773958
TAACATTTTCATTCTTGGGAAATGGGCTAT[C/A]TTTTCTCGAGAGAATTCAAGAAAATATATT
>A01_1774276
GTATACTCCTTGAGCGTCGAGATATTTAGC[T/C]TAAGCAGTCGGGTGGCATTCTCGTAATAAA
>A01_1774318
GTGGCATTCTCGTAATAAAACGATAATCCC[G/A]TGTCTTAATAGAACACTCGCTTTTTACTAC
>A01_1774502
TTCTAGCGACTCGGGTTCTCACAAGTTCTC[G/A]ACTAAATCCACCATCTTCGGCCTAAACCTC
>A01_1774860
GGTTCCGAGGTGATGGGGTGGGGAAGATGG[G/T]ACGGTTTGAAGGATCTGGAGATTGCGACGC
>A01_1774901
GGATCTGGAGATTGCGACGCGTGGCTTCTC[T/C]GATGAGAACGTGATCGGAGAAGGAGGATAC
>A01_1775512
TAATCTTTTCCTTTTGTTTTTGGTCTTTAT[C/A]TTCTCTTTTGTTTTAGTTGTTTACCTTTAG
>A01_1775629
CAAATAGCCTAAAAGAATCTGCTAAGTTTG[C/A]TTTCTGTGTTTGGTCACTTCATTGTTCCAA
>A01_1776286
GCATTTTTATTAAACCTTGGCTTTTGATGA[A/G]CAGATTAGCCTATTTACATGAAGGGCTTGA
>A01_1777131
CAGGGAGACCACTTGAGAGTTGATGCTATT[G/A]GCTACACAACCAGATTGATAGATATGTCTC
>A01_1777880
TGCCGCCGCGTCCTCCGATCCGTCGATCCT[T/G]GCCTACGAAGATCTGATTTCGCAGTGCGTT
>A01_1777958
GGCGGAGAAGATCGGCGGACCTGTTCTAGA[C/T]GTGACGAAGATCGTCGCCGAAGCGTTCGCT
>A01_1778111
TGATCTTTTTGATTGTGAGCAGAAGCCTGA[C/T]ATGGCTGGGTTAGCTGGATTTCTCAAGCCG
>A01_1779587
CAAAGATTCTGTCTTGCAGATACAAGGTAA[C/G]TTTGCGCCATTCCAAGTTCAGCCTAGAAGT
>A01_1779983
TATGATGTAGCCCTATAATGTCTGCAGTTT[T/C]TTCTCGAGACACTGATGCTCTTCCTTTTGT
>A01_1780505
TCTGTCTCTATATTTTGGGATTGGAGGTTC[T/A]TTTGTTTGTTTGTTTGTTGTCATCTCGATC
>A01_1780556
CATCTCGATCATCTTCTCTTTTGTGTGTCT[T/C]TGGGGTTTTGGATTGGATTTGGGCTTTTCC
>A01_1780598
ATTGGATTTGGGCTTTTCCTTCTTTTTTTT[T/G]GGTGCGCTCATACTTTTTTCTGAGTTATTA
>A01_1780848
AACAGTCTTATATAATAATTGAGTTGAAAA[A/T]TTGTGAAATCACCAAAAAGCTAGAAATAAT
>A01_1780880
TGTGAAATCACCAAAAAGCTAGAAATAATT[G/A]GAGGTGGTGGGGTTGAAACGTGAAGAATGG
>A01_1781679
CTCACTTCCCTTCCTCACGTAAGTATCTTC[G/T]TCAATACGACGTAGCTTTTACCCTCCCTCA
>A01_1785205
GAATGGTGCGACGGATGAGCAGTTGCAAGC[T/G]AGCTTGGATTGGGCGTGCGGACAAGGAATA
>A01_1786581
TCATCTCTCTTCTCCTTTCCCACGTAATTC[C/T]CCTAAAATCAACTCTCTCTAGGTTTCAATC
>A01_1786737
TATAATGTCTGTCTCCGAGCTCAAAGAACG[C/T]CACGCCGTCGCTACAGAGACCGTCAACAAC
>A01_1787012
CACACCGGGAAGGTGAGTGATCTTATCTCT[C/T]ATCTTATTACAAGTGAATTGAATGTTTGAT
>A01_1787487
TATTGAGATTAGCGGTTTAGGGAGTGTAAA[T/C]CATTTTAGGGTTAACCAAAAGCTTCATTCT
>A01_1787531
ACCAAAAGCTTCATTCTTTATGAGGATTTC[G/A]GATGAGGTAGCTAGCTTTAACATGTGTAAA
>A01_1787592
TTTACAGGTTTATTCGTTAGACTGGACGCC[G/T]GAAAGGAACCGGATTGTTAGTGCATCTCAA
>A01_1787676
TGCTCTAACGAGTCAGAAGACTCACGCTAT[T/A]AAACTCCCTTGTGCATGGGTTATGACTTGT
>A01_1788012
TGATGTACTAAGGTAGGGGATGTTGCTTCC[T/A]TCTGCTTGCTTTATTACCATTTTGATTTGG
>A01_1788065
TGATTTGGAATCAATCTGTAGGTTTGTGAT[T/A]CAAGTTAAAACTCATGCTCTTATACACCTT
>A01_1788592
TTTGGGGGAACTGCAGGATTCGCACAAGAA[C/T]CGGATAAGCTGTTTGGGGATGTCAGCAGAC
>A01_1788622
CCGGATAAGCTGTTTGGGGATGTCAGCAGA[C/T]GGAAGTGCCTTGTGTACAGGAAGCTGGGAT
>A01_1788950
GAAGGTGTGTTGTTGCTTTTGAATAGTGGA[A/G]TTGTGTTAGAGAGATCAAAACTTCCCATGT
>A01_1789098
AGTGTTAATTCTCTAATTACTTCGTGCTTA[A/T]ATCCTCATATATACTAGTGTACTTTTGATG
>A01_1789519
GACAGAGACGTCCTCTGCTCTAACCGCCAG[C/T]TTCATTGCAATCTCCTTTGAACTGTCCATC
>A01_1789677
CCTGCAATTTTATTTCTCAAAGTCTCAGTT[G/T]CAAGTTATCATCAAACCGGGAACCACAAAC
>A01_1790086
TATAGTAAATAAATAAATAAAGATGGAAAT[G/T]AAAAGCAACATGTACCTCCTTAACAACGAA
>A01_1790389
CAGTACCCTCTCCAACAACTGCTCTGGTAT[T/G]GTGTTGGTGCAGTTGTACTGAAACACCACA
>A01_1791093
AGATAATGTTTACAAAGGCAAACACATGTA[T/C]GCATGTACAATGATGCAACCGACCCAAGGG
>A01_1791133
ATGATGCAACCGACCCAAGGGTACACAAAC[G/A]GCATACAGAAACAGAAATGCACAGATATAT
>A01_1791173
AACAGAAATGCACAGATATATTACTGAACC[C/A]ACGACTGGAAAGTAGCTTTTCTAGACTAAA
>A01_1791342
AAAAGAAGAGAAAAAGACGCTAATAAGATA[A/T]CTATACACACCTTCAAGGATTCAACCATAA
>A01_1791579
TCAATAGCAACCAGATGGATTATGGAGAAA[A/G]TAATTTACCTGCGTTGAAAGATAAGTGAAT
>A01_1791674
ATCCACTTTCCTTCGCATCAGGGATATCTC[G/T]GATAATGGTCACAATAGAATCTACTATTGC
>A01_1791707
TAATGGTCACAATAGAATCTACTATTGCTC[G/T]TTTATACTCAAATCCACCTTCTTCCCTAAG
>A01_1792159
TTGGATGAGTCATTGCAACCTGTGGTTCAA[A/G]CTTGCGTTTAGCGTACGATGAAACATTTTT
>A01_1792868
TATTGTTTCTAGCCTCTCTATTTTCGAGGT[A/T]CTTCATCTCAGTAAACATAAATCAATTTAC
>A01_1793324
ACAATAATAACCTATAAGAGAATGATCAAA[A/C]AACTTATCAGAAACATATACTTTCAAAACG
>A01_1793629
AAAAAATCGAAAGCTGACCTTGGTGAATGA[C/T]TCGCCTTGGTTAAGCAAATAAAGAAGCTTG
>A01_1794082
TCACTCAGATCTCGCTTTTGAAGAGTCGGA[C/G]GTTCAGAAACTGATGGGATCGAGCGGTAGA
>A01_1794161
GGTAGGCCTCAGATTTATACGCTGAGCTCT[A/G]AAAAAAAATACTATGATCTTGCGAGAGACT
>A01_1794232
ATTTGTGAGGTCTTGCGAGAGTTTATAGGA[G/A]TGATGATGCAATTAATCAATTGATTATTTT
>A01_1795058
CTCTTGTTGATTGTAGTTTGTCTCTAGACG[A/C]GGATCTGCTAATTGGCTATAATCTCCATCT
>A01_1795429
AGTAAGACTGTTCAAAGCTACTTACCCAAA[T/C]GTTCCCATGACTCTAGTGGAGACATGAGTA
>A01_1796001
CCTTTGGCCACCAGAGATGCAATAACCAAC[A/G]AGAGAAACGAGATGACGATGATGGACACGG
>A01_1796100
TTGTCCACTTCCAAGTTTAAGACTCTTCAC[T/C]GCAACTTCTTTGCCACCAGGCAAAACACCT
>A01_1797062
AGGAGGGGTTGGTCTTTGTGAAGGGGGTGA[C/T]TGGTTGGCCGGTGCTTGAGGCGGTGCAGGT
>A01_1798505
TCTTCGAGCTTCGCAAGATGCTTTGCCTTT[C/A]CTGCCGCAGCTGAGAGAGCAGAGATAGCTG
>A01_1801055
TAAGAGCATCAATTAATCGCCACGTGTACT[T/A]AGATTCAACATGATTAGGATCTCAGCAGCT
>A01_1801257
TTCGAAATCAGCTTCGATCTTAGCCTCCAA[G/C]GCCTCCCACTCGCGGATCGCCTTGTTCCTC
>A01_1801335
CTTCTCGCCGTCCGGGGCACTCAGCAGCTC[C/A]GGCTTCGCCTCGGTCGCGGACGGCATGTTG
>A01_1801524
CGATTTTCTTTTCACGCGCCGCCGCGGCGT[G/C]GGCTCGGATGCCGGAGAGTCTCCGGAGCTG
>A01_1801827
TGTTCGGTTATACTTCGGTTTAAATCAATC[A/G]CTCTGAAATTAGCATCCGGTACGAGGGAAT
>A01_1802768
AAAGGATTAGATGTAACAAACCACAATGCG[C/G]TTCTCCACAACATCTTCGTAATGCAAAAGG
>A01_1803242
ATTTTTGAAATTGTCAATTTTCAATAATTT[C/T]TAACCAATAATATTTCAATAAACTCAATTA
>A01_1804700
AAAAAGTTGCATGTAAATGAAAATTTATAA[T/A]GGTGTTTTTTTGTTAAATATACATCAACTT
>A01_1805715
TGGAGCACTCCATTTTTATCTTCACTCTTT[G/A]TTGATCTATCTTTGTTTGGTGTTCTACTGT
>A01_1805782
TGCAATCTCTATTAGTACATTTGCCTGTAT[A/T]TATATGATACATGTTAGATTCATGTACGTC
>A01_1805956
TTCTTAATTGATTTAAGTTATCTTCAATAA[A/T]AACTTAAATCCATTTTTAGGGGTCAAGTTA
>A01_1806694
AGATAGCTATGAAGTAAAAGATAGCTATAG[T/A]TTAGTAACTCTATCTTATATGCCGTCTGCT
>A01_1806797
GGTCTCCCATATAGTGAACACAAGTTGTCT[T/C]TTGCAGCTGCAGTTCACAAAATTTTGAGAA
>A01_1811299
TATAACTAAATGTTACAACTCGTTTTGTAG[T/C]GTTCTTATCAGTTAAACCTCTTTATTTATT
>A01_1811455
CAAGTCATTCCAGTGTCAACTCTCTTCTTC[A/G]ACTAAAACAAGAAAGAGCTCAATTTTTTTT
>A01_1811766
AGTGTAATCCGCAAACGGGAAGTTGAGTTT[C/A]GCCCTCGGCCCACGGAACCCAATAGCGGCC
>A01_1812134
ACACCTGGCAAGCGTCGGAATCCGAACGAG[C/G]CATTCCCGCGCTTATCACTGTGCTGGAGAA
>A01_1812438
GAAAGTGGAAAGAAGCTCTTTATATATGGG[C/T]GTTTTCAAATGTTGGTTAGTTGCCAACTGG
>A01_1812565
TCTGGGCATGTCGATAATGATATTTTATTT[C/A]TTTATTTTTGGGATGGGTTTATATGACAGT
>A01_1812702
TTTGTGATTTGTTATTTAATTATTATTATA[T/G]CGCTTGTGTTCGTTTTCACACAGTTTATAT
>A01_1813039
CCAATAGACATGTGCAACATTACATTAACA[T/G]TGTGCTTCACACAAACTAGTGGTGAATTAA
>A01_1813187
TCACGTTGCTTTTCTTAAACCTTATGATTC[A/G]ACGACACAACTTCTCAATCATCATTTCTTA
>A01_1813535
AAATTTATAACATTAACAAAATGAGCTGAA[G/A]CCAAATATGTATATAGTTTTTGTATTAATG
>A01_1813639
TATAATTGGTTTATGACACTAATGCTGTAT[A/G]TGTGATTTTAATTAACTTATTACATAAAAA
>A01_1813699
ATAGGAAAATCATGATGCCCCCAGTTATGT[G/T]TGTAAGTTTACAATACGAATCGTACTAATA
>A01_1813729
GTGTAAGTTTACAATACGAATCGTACTAAT[A/T]ATATTAGCATAGTTTCTGTAAAAGGAAAAC
>A01_1813768
ATAGTTTCTGTAAAAGGAAAACATTGAGTA[T/C]TAAGAACAAGTCTTTATTAATTTGTCTATA
>A01_1813870
ATACGATATGCTAGAATTTGAGAAATTCAA[G/C]TAACATGAGAGAAACTTACTTTAATTTGTA
>A01_1813937
TTTCTATTGGCTTAATACATTCAAAATGAA[C/G]AAAATGAGTTTAATTAAGTAAAAAAGGGAG
>A01_1814127
ATGTGGATTCACTAAGCCCTTACGTCAGTC[C/T]ATCACAGTGTTGACCCTTTCTCCACGCTGA
>A01_1814612
TAATCGAATAAGAATGGATAAAAGCTCGGG[G/A]GATTGACGTGAGGGGATATATTTTAATTTT
>A01_1814708
TTAATATACTAGCCTTTGAGATTTTGCCAA[G/C]AAACAAAAACTTTAAGATTTAATGTTTTCT
>A01_1814744
AAAACTTTAAGATTTAATGTTTTCTACAAA[T/C]TTTAGTTGCGTTATGCTCGCATTTTACTTC
>A01_1815170
TGATTGTAACACGTTTTTTGCGCTGACCAA[C/T]GTTTTCCTTCACTATCTCGCCGCGTCATAA
>A01_1816556
CAATTAAGCAATCAAGGTACCACCTGTTTC[A/G]AAAATCGCCGCCGGGAATAGGAAAACAAAG
>A01_1816923
AGCAGCTTTGAACCGTCAATTTCATATACA[G/A]GAGTGAGAAAATATTAAAATAGTGCTATAT
>A01_1817079
CAAATATCCACATTCCAGAAAATAACGCAC[A/T]TGTTCCCAAAAATTAATTTTTTCAAAAAAA
>A01_1817120
AATTAATTTTTTCAAAAAAAAATATCTCAG[A/C]GGAAATTAGTTAATACATAAATGTTCTCAT
>A01_1818013
AGATTTAGACTAATTAAGATCGATTTAGAT[A/G]AATTTTAACTAATTAAACCAATTTGAATTG
>A01_1818051
ACTAATTAAACCAATTTGAATTGTATAAAT[A/C]AAATTTTAGAATAATGGTTTTTTTATTTGT
>A01_1818245
TTTAATTATCAATAGATTGGTCGGGTCTCT[A/G]AGGAACTAATTTGTAATTTATAAGATTCTC
>A01_1818359
ACTAAACAAATTTTCTATTGAATCATTTTC[G/A]CTAAATAAACGTGACATGACAATGCTACAA
>A01_1818402
GACATGACAATGCTACAAAGATGACATAGC[G/A]TATAAATAAATGTGACATGGATGATTTTAA
>A01_1819135
ATTTTAAAAATAGTTTCAAACATAATTTTC[A/G]TTCTTCAAAAAGAAATTTGAAAAAAAAATT
>A01_1819480
GTTGAAATATATCATTAAATAATATAATAA[T/A]ATTCTACTAATTTCGACATATTATTTATTT
>A01_1819556
TAAAATTTTATTACCAAAAAATTACATGTT[T/C]TTTGTCCAATAATATAGTAAAAAAAACAAG
>A01_1819814
CCCAAAGCTACTTTGACCAGAGAGATGTCA[A/C]TAAGAGAGTATATCAGAGCCTGGATACCAA
>A01_1820116
GGCAAATGCGATTTATATTTCAAAGTATCT[C/A]AGGAATGACACTATCCTAAAGTTTATTGGT
>A01_1820147
AGGAATGACACTATCCTAAAGTTTATTGGT[G/A]ATAACTTCCCATTGAATTTGGATACTAGCT
>A01_1820504
TTGTCATTTCATAAAACACTCTGAAATCTA[T/C]TGCTATTGAACAAAATTTAAGTTGGAGATT
>A01_1820618
ATTTAAAAAAATCCAAATCTCACTATTTTA[G/A]ATGAAATTTTAGAGTGTTTTAACAAAAATA
>A01_1821022
ATTTGATTTTTCCTTTTTTAAACATTGAGT[G/A]CCTCCTTCATTAGTTAAGCAAGATAATTGA
>A01_1821280
AGGAAAAAAAAAAAGAAAAAGAATTTTCAA[A/T]TTTGGAAGAATCAAGAGGATAAGCTGGCCT
>A01_1821558
GAAAGCACGCTGAGCCATCGGAGGGTTGTG[T/C]CTGCTCGTCTGGTTCTGGCTGATCAACGGG
>A01_1821612
CAACGGGTTGAAGTCTTCGAACCACTCACA[G/T]GTTCTCAAAGGAACCTCCTCGATTTTCTCT
>A01_1821939
GTAAGTTCAATTGTTCATATAGTTGGAATG[C/A]AACACAAGGAAAAAGGGAATAGAACTAACT
>A01_1822052
TGATGGGAATGAGAACTCCACACAAGAAAG[G/T]CCTTCTATAGACGAGATTCCTTCCGCTTGC
>A01_1822244
TCCAAGAAAATAAACAGCGTTTCTGGGAAG[C/T]GTATCGCGGAGTCTTTTGTACGTGGCTTGT
>A01_1830789
TTTGCTCTGGCCTTCGTTGATCTGGACAGT[G/A]AAATGCTCCGTCCAACCTAAAAAACCAATT
>A01_1831268
ATTCACCTGAGCTGCTAGAAGCGATTCCTG[C/T]GTGATGACCTGTAAAAAAAAAACAAATTGA
>A01_1831774
AGCTCTCTCTCTCTCTCTCCGGTTTATTAA[A/G]AGAGTAGCGAGAGAAGAGAAGAAGAGGAAG
>A01_1831898
CTTGCAACGTCGTCGTTTTGGTTACCAAGG[A/T]GAAAAACTCAAGGCTGTTGTGTTGTGATTG
>A01_1833923
CTCCGGTTCTTCTTTCTCCTCAATATGTCT[G/C]TTTCCCTGAGCACACAAATATATACTGTTT
>A01_1834032
AAAGTAAATCAAACTCATATCTTTGACTAT[C/A]CTATTAAGGCTCAGTTTCAAACGATATGGA
>A01_1834213
CATAAGGTTGGATTCACTTTTGTGACAGTT[A/T]ATTTTGTTTTGGCAATAAGCAAAACATATT
>A01_1834864
AACCACATCGAAACACTCGGTGTCAAAGGG[G/C]AGGTCTAGCATGTCAGCTTGCACCACTTTT
>A01_1835110
AGTCTGCATCTTCTCAACAGCAACGGAAGA[C/T]AAATCAATGCAGGTGATATCAACAATCCCA
>A01_1835215
CTCCAAAACCTTCATTACACCATGCACACA[C/A]AAAAAAAATCAAAATCACATTTTTGCAATT
>A01_1835342
AAGTACGGAAGAAGAGGTAGTGATGTTGGA[T/G]TTGATGAGATGCTGGAAATGAGAGTAGTCC
>A01_1835651
GCTTGTTATAACATACGGGCCTTGAAATTT[T/A]CGGCCTTTTAAGCCCATGTTATGAAGATTA
>A01_1836058
AAACAATCTAGAATCCCCAAATCACACACA[T/C]GTTTTAGAGTTTAACCATAAATTTAAGACT
>A01_1837345
AGACGATGTGGTTATCCTTCCTGCCTTTGG[A/T]GCTGGTGTTGATGAGATGTTTGTTCTCAAT
>A01_1837465
GGTTGAGAAGCACAAGAAGGGGGAGTACAC[G/A]TCGATAATTCACGGTAAATATAATCATGAA
>A01_1839715
GCCAAATCCGCAGTAGCTCAAATCTGCGAA[C/A]CCGTCGGCTACAACCATTTCAAGGACCCCC
>A01_1840466
GGAAGCAGAAGAAGAAGAAGAAGCCTGTTG[G/T]TCTTTCTAAGCTTAGGACCGAGAAGAAGTT
>A01_1840593
GGAAGATAGAGATGACAAGAGGAGGAGGGC[T/G]GAGTTTATTTTGAGACAGTGCATGGAGAAT
>A01_1840880
TGTTTGCTTGAATAAAACAACTTCATCAAC[A/G]AAGAACACTTTGAAAATGAAAATGAAAATG
>A01_1840915
ACACTTTGAAAATGAAAATGAAAATGAGAA[T/A]CCTTCTATATTCACGTCCAAGTGTAGTTAG
>A01_1841497
TGTTGCAATCCAAAGAGAGACTTATAAGTG[T/A]AATCAACAACCTCACAGAAACTAAGGACTT
>A01_1841769
ATCTGCTAACTTGCTACCAAAATGTGGGCA[G/A]CTGTAGAATATCTGAAAAAGAGGTCAAAGA
>A01_1841925
TAGTTTATCGAGTTTTTCTTCCTTTGCTTT[G/A]TGTAGAATCTGCTTCACAACAAGGCCTCCC
>A01_1841998
AAACGTTTCTTGATCAAAATTTATGTCTTG[T/A]TGTTCCAGGAGACCATATTTAGTTTCAATA
>A01_1842081
CTTTAACTGGTAGAGAGAGCAACTAAGTTT[G/T]CACTAGAAAATATCCATTGACAGGTTCAGA
>A01_1842148
AGTCACGAAAACAACAGGTCGATCTCCAAT[G/C]CCTGCTGAGACCAACTTTTCCAATATCATA
>A01_1842255
TGCAGGCTTGATAAGGAGATGTTGTAGAGT[T/A]CACAAACGGAATGCTGTATCTAATCAATAA
>A01_1842410
AGAAAAATCAAATTGGCAACCATTAACGCA[T/C]AAGGAATTAGATAAGGACACAACATATAGA
>A01_1842488
GATGTCCATTGAGTAGGTATGAGCATAAAA[T/C]ACAGCCATACCTTGTATTTAAGGGTAAACA
>A01_1842568
ATTTGAAAGCCACTCACTCGGCCAAAATGT[G/T]CCGAGCTTTCCTGCTTCCTGGTCAATCTTC
>A01_1842985
ATTTCCAGATCCACTATCACCTTGCTGATT[G/A]CAATATATGTTTAACAGAGAAGCCCTCGCA
>A01_1843053
GTGTCTTAGGGTCAGTGCAGCCGGAAATTC[T/G]TCCTCTTGCACAATCATCAAGCCATTTGCA
>A01_1843204
ACTAGCTGGGACTTTCACACTAGATGGATC[T/C]TGTATATCTGTGATTGAAGATTCACCAACA
>A01_1843462
TGCAGACTCGGCAGCATTAAATTTAGGGGG[T/G]TTGTCCTTCTTTAAGTTCTTAATAGGTACC
>A01_1843927
TTCAAAAGTGCTTGAAAGGATTCTTCTTGC[T/G]GAAGATTGAACAGTGTCAGATGCAACCTTT
>A01_1844542
CAAATTAGCTTGCGAAGAATTATCATGTTT[G/A]CTTATCAATGCAAATGTTTTAGGAACTTCC
>A01_1844812
ATTTCCAGGCAACGATGACTTAAAAGAAGT[C/A]TTTTCTATTGTGTCGCAGTTGGAAGTGACG
>A01_1844851
TGTGTCGCAGTTGGAAGTGACGATATCCAT[T/A]ATGGCAGTCACGAGCATGCTCCTACCTTTC
>A01_1846048
TTGGATATGCGATATAGATGGGAAGATTCT[G/A]CGGGTATCCATTTTTGCTGCTAAGGTTTGA
>A01_1846462
GACACGGTCTTTGCCTGCGAATATCTTCTT[C/G]AGCTTCTCGTCGCAGATTATAACCTTCTTG
>A01_1846938
GCATACCTGAAGGTCGTGTTCCTTGATGTA[A/G]GCCCAAATGCGCTTAAGAGCCTGCGTGCGA
>A01_1847004
CACCGGCTCACCCACCACGTCCTGCATCTC[G/T]GGGGACACTGGGCGAGGCTTCATGATGCCA
>A01_1847217
GGAGAAGATTCCAGTAGAAAGAGCCATCGT[C/A]GTCGTCGTTGTGAGGTGGTGGATTTGGGAA
>A01_1849330
AGAAACCATGACAAGTCTTGAAACACATTC[T/C]TCTTATTAAATGAGGATTAAGAAAACACTT
>A01_1849386
CACTTGTCAACTCACCCTGAAGGGATCACC[G/A]CGTAGAGACTGGACAAACATCATGGAGAAT
>A01_1854168
CTTGGCTGAGAGGCTCAAGATTGTCGTTCT[T/C]CCCAATCTTGCCATCATCAAGAACACTAAA
>A01_1854755
ACATCAAATTAAATTAAAAAGAATCTAACA[C/A]ATCCATCTTTTTATTTTTAACACTTTCACT
>A01_1855171
AAGAAAAAAAGAAAGGGCCAACATTTGCCG[C/G]CGATTGAGATGGAGACGGAGGTCGATAAGG
>A01_1855587
TCATTTTAACGCGTTTGATGCACTTGCGGG[A/T]TGGAAGCAAGAAGGGCTTCCACCTGTTGAG
>A01_1855943
AAAAGCAAAACCTGAGGGGGAAGCTAGTCT[G/T]AAGTGGGAGAACTGTGAAGAGCAGATTGAT
>A01_1856056
CTCTACTCAATACAATCACAAAACATTTAC[C/T]TTTGTCTTTTGGTACATTCTTCTGCGCCTT
>A01_1856469
TGCCTTTTCACAGCTTAGAGTTGATGGTGT[A/G]CTTATGAGGTTGAGAGAGACGAGAATGCAT
>A01_1856511
GAGAGAGACGAGAATGCATTATGTCTTTGG[G/C]AAAGGGGAGACACCCACAGTTCTTCGTGAA
>A01_1861760
TCAAATTTTATTTTAGTTAATTTCTTCTTG[A/G]AAAATTCATTTGTTTATTTTCCATATATTT
>A01_1861792
AAATTCATTTGTTTATTTTCCATATATTTT[C/T]ATGTGTATGTAGTATGTACCATTGTCAATA
>A01_1861823
ATGTGTATGTAGTATGTACCATTGTCAATA[C/T]GTTTTAAAGAAAAATGATTGAACATCGTTT
>A01_1864944
ATATATAACACAAATACATCATATCTAAGG[A/C]AGATATTGATTGATCTTGATACATTCAACA
>A01_1867252
AGGAGAGTTGCTTTCACTCGTGAAGATATA[G/T]AGAGAGAGAGAGAGGTCTGGTCCTGAAGTA
>A01_1867453
TAAACCAAACCCGAAAACCCGAACCGAATC[C/T]GATCCGATAAAAATGAATCCGAACCGATCC
>A01_1868181
TTCATATAATCCGAATGGGGCTGATTTTGA[A/T]AAACCCGTAAAACCAAAACCCGATTGGATA
>A01_1872687
TATCTATTTATTAAAAGGTGAATTAGTTAG[C/A]CGCGTAATGTGTCAATGATTAATTGAATCA
>A01_1872813
AGAAAAAAAATCAAGAGGTGAATTTTATCT[A/G]GAAATTTGTAGGCCATTTACATTGTTTAGT
>A01_1872877
AAAGAGTCATTAACGAATCATAAGATCAAT[A/G]TTAACACTAATATGGAGTCAAATTTAAACT
>A01_1874731
CTCATGGTAAATACGATTTCAAATGTTTCA[T/C]GCATAAAAATTAGTTTTTGGTAGTTTGAAA
>A01_1875068
AGGTGACAAGGGTTTTACCTCTTTTTAGTT[A/T]TTGTATTGGTATTTATTTACGCCAATATAT
>A01_1875245
ATAATAAAGATCTAGATACCTAACAGTCTA[G/A]CACTCCCATCGTGATTCATGATATAAGACA
>A01_1875318
TTATCTACTACTATATGGCAAAATAATGAA[T/G]TGCATAGGGTGGAGAAGTAGATACAAGCCA
>A01_1875412
TATCATTTTGCACTCACAATTAAAAGCGGA[T/G]GAATGGTGCGCAGATCTCAATGTTGAAGTA
>A01_1877873
TTTTGGTGCAAAATCTTTTGTTGTGATGAC[G/A]TAGTCAACGCCAATGCAAGCCTGTCCATTG
>A01_1877918
GCAAGCCTGTCCATTGTTACAAGCCCATTT[C/A]CCTGTTATGATCCTCCTAGCAGCAACCTTT
>A01_1878266
TTCACTAAAGAGCTTTGCTAAAAGAGAAGA[T/C]GTCGCTGGAGCGATTTCAGAAGGTTTTAGA
>A01_1879004
GGAATGTATCAAAGTGAAAGTAAATGTGAA[C/A]ACCTCAGCTAGAAAAGCTTCAAGCTCAGGT
>A01_1879112
GTCGATCATCTTGGCGATGTTCTGAAGCTG[G/A]GAGATTCTCCACTCGTAGCTCCTTGTTCTG
>A01_1879660
CCCTCCGGCAAAAGGAATGGTATGATGATG[A/T]TTGATCTTTAGAAGCTTCGTCATAACTTTG
>A01_1879973
TTTGTACCGGTTCGAATAATCCGCCTATCA[T/C]AACTCGCCGATTCGTTGGTTCATACCGAAA
>A01_1880253
ATTTTCTGATTTTTCCAATGTTGTAAACAA[C/T]TTATTATGCAAGAAACAACAACCCAACTGA
>A01_1880355
TCAAGGAGGCCGGTAGATAGAAAGGTAGAA[C/G]TGCAGAGGTGATGGCTATTGATATAACACG
>A01_1880963
ATTAGAAACAGAGAAAGATAATCAAGAATG[A/G]GGAGAATGGAGGTGGAGAGGAAAACAATAG
>A01_1881683
ATTGCTTTTGATTGTTCAAACTGAAATCAA[A/T]TTTTTTTTATGGTTTTCTATACTACAGAAC
>A01_1881748
GATCTTTAGTCTTGGTTTTCATATACAGTC[T/G]AGTAATAAAGATTTTTAAAAATAATTAATA
>A01_1882698
TGTGAAAATGGACTATGTAAACACTGCGCT[C/T]GAGAGACTCGAGAAGAACGATGTGCGTTAT
>A01_1882757
ATAGGTTCGTGGTTGATGTCGAAGGAAGCA[G/A]ACTCGAGGCTTGAATTACTTTTGAAACTAA
>A01_1882832
TCTTTTACAAACCCATTTACGCCGTTTTCT[T/G]TTTGAATGTGGCATTTAATATGACTTATAT
>A01_1882931
TTAAAACGTCTTTGTTTGAGCATTTTTAAT[T/A]ATGAGTTACTAGCCTTGAGCCCTTCGTTTG
>A01_1883031
AAAACTGACTAAGATAATATTTGTTTTAAT[C/A]ATGTGGTGGTTGAGGAACATGACTCATGTT
>A01_1883293
CAGCATCATCTCTCTTCCTCTGTGGGATAT[T/A]TCTCCTTGCGCCTTGAACTGGGAGGTAAAA
>A01_1883392
GTGATTGGTGAGTATGAAAGAAGAACGGAG[C/G]TGAGCAGAAGGCCTTGTTGTCTAATTCAAC
>A01_1883581
GTATTCTCTACGTGTGTTGTATGTCTGATC[T/G]TTGGGTGCTTTTCGTCTCTGTCGGGATTCT
>A01_1883625
GTCTCTGTCGGGATTCTGGGATTCCTTTCA[C/T]TCTTTCTGGTTTGAGAAAATTAAAATTATT
>A01_1885064
TTTCCTTTTGTGGGCGCTTCTCTGCTTTCT[C/T]CTCTGTCTCTTTCTTTCTATTTATATTTTC
>A01_1885513
CTTTTTGTGGTGTTGGTCCAGTGTGATTGA[A/T]TAGAGAATCTAACCCATGATCCATCCGGTT
>A01_1885572
TTTTGTTGACCACAAACCAATTCCAAATTG[C/T]TTCCATTCTATTTCTAGTTATTTTTGTTGT
>A01_1886092
AACTCTGTCGCTAATCACCACATCTTTTTT[G/T]TATGTTTTCTTGGCTAGAAAGAATAGTCTA
>A01_1886469
AAAGTAAAAATATCGTCAGAAATAAATGTA[T/G]CTTCAAAAGAGTTCATCCATGAGATTTAGT
>A01_1886499
TCTTCAAAAGAGTTCATCCATGAGATTTAG[T/C]CCATTAGATATCAGAATAAATGGTGTTAAA
>A01_1886572
CTCTAATTCATAACTTGCAAAGCTGATCAC[A/C]ATAGTCCATTAGATATCAGAATCAGTAGTA
>A01_1887052
CGCGATTCTAAAGCGACAGCTACACAGCTT[A/G]CAAGAAAACCACCGGTATGTGTTTTGCATC
>A01_1887311
ATATATAGTTACTCTGGAAAAAGTTTGCAT[A/G]TTCACAAGTGATGGAGGAAGAGCTTGTACT
>A01_1887366
TGTACTTGGCAGGCAAATGATGGGGGAAGA[G/A]CTCTCTGGACTAAGTGTGGAAGATTTACAG
>A01_1888192
GTTTGACGTTTAGGTATGTACTGTGCGATG[G/A]TCAAAAAACGTAGTGTTCTTTCTTAGGTTC
>A01_1888315
ATAAGTTGTAGTCAAATTTCTCTAAGATAT[T/A]TATTTTTGTGTAAAGATTAATCTATTTATC
>A01_1888447
GAATATGGTAAGGAGTTCACATGGGCTTAT[C/T]TGTTTCCGACAATAAAAACAATGCATTCAA
>A01_1888613
AAATCTGAAAACAAACTTAATTGAATCATA[T/C]ATGATGAGATTTTAATCTAAAAAGTACAAT
>A01_1888751
AAACATATCAGTAAAATAAAAACAGAAAGG[G/A]AATATAAAATACAAGAGAGTAACGACATCA
>A01_1889232
GATCCACATACCAGATATTGTATATCTTTC[T/A]ATTTACAATTTTCTTTGATATATTATAGAC
>A01_1889311
ATCTCTTGGACAACACTATCGTTTTTCTGG[C/T]CTCTATTTTCTCTCGTTAGAATCTTAATTC
>A01_1889373
CACGAAACCAAATAACATGGACCACTCGAC[C/T]CTTTGTGTATCTATTCGCCTACGGTCTATA
>A01_1889443
TGATGCGGCCATTAGTCGAGACACTCGTGG[T/C]TTTCCTGTTTTCTTTCCCAAACCCCTTTTT
>A01_1889528
CATTTACATATTTTTTTTTTTTTTGTAAAA[G/A]GGTTAATTCTATAGCATATGATATGACAAA
>A01_1889691
ACAGTCAAACTCTGCAATGTCAATTTTCAT[T/G]TAAAATAATTTGTTGTTATTATGATATTTT
>A01_1889958
CTTAATCACCACGGTCGGTGATTAGTCCTT[A/T]ACAACTTTATCTACGGACCGCATTTTCCAA
>A01_1890699
GGACAGGTGTCACATGCACAGAGCTTGGGA[A/T]GCCCAGTACACCAGACATGTTCAGAGTCAC
>A01_1891600
CCAAGTCAGGAAACGAAGAAGGTCCCCAGA[G/A]TCCACCACGTTCAGCCTCTTCACAATCTGC
>A01_1891819
AACGGTTCAGGCATTTGATCGAACAGATGG[G/T]GGGCGATTGAAACAGAACGCTCAGACTAAA
>A01_1891978
GGCGGTTCTTGAAAACGGCACGGCGTTCGC[G/A]GTGCGGCGGATAGAAACGGAGAGCTGTGCG
>A01_1893602
CCACCAACCAAACTCTTTTCCGACCAGACA[G/T]CATATATCTCCAGAGTCCAGACACACACTA
>A01_1893988
CACCGGCAAAGTGTGCGGCGTAGGTCCGGG[A/G]ATGGCGTTCGCGAACGCGGTGAGGAAACGA
>A01_1894126
GAGCCGTTTGTACGAGACGATGGTTAAGAG[A/G]GCGGAGGAGAGTAGGAGATACGGAGGAGAG
>A01_1905920
CCACGCGCGAGACCAGCGTAAATCTATTTA[A/G]GTGATTCGCTATTCCTGTTTATAATAATGC
>A01_1906474
GGCGTGCACAACCGGAGACGGATCCAAGCC[G/A]ACGATCCTCGTCGCCGAGAAGCTCGGTGAG
>A01_1906539
GTGTGAAGCTCTTGGAGGATTTCGCGAATG[A/T]GGACTGCTCTTACAACCTGACTCCCGAGGA
>A01_1906831
CATGGCCAGGAACGTCGCACAGGCTGATGC[A/G]TCTGTTAAGGCTGGTCAGTTTCATAATTAT
>A01_1907085
GTATTAGGCTAAATCTTGTTGATGGAAGTA[A/G]GGCAAGCATTTTGAGTTTTGAGTACAATTT
>A01_1907625
GAGGGTTACTGTGACACCTCATCTTGGAGC[C/T]AGCACAATGGAAGCTCAGGTTTGCAATTTT
>A01_1908605
GAAAGTGGAAGGAAGGGTTAAAGACGGAGT[C/G]CCGCATTTGACGAAGGTTGGATCGTTTGAG
>A01_1908638
GCATTTGACGAAGGTTGGATCGTTTGAGGT[G/T]GATGTGACTCTTGAAGGTAGTATTATACTG
>A01_1908671
TGTGACTCTTGAAGGTAGTATTATACTGTG[C/T]AGGCAGGTGGATCAACCGGGTATGATAGGG
>A01_1908770
GAACTTTATGAGCGTTGGAAGAATCGCACC[C/G]AGGAAGCAAGCTATTATGGCGATTGGTGTA
>A01_1908851
GACTCTTAAGAAGATTGGGGAGATCCCTGC[T/G]GTGGAGGAGTTTGTTTTCCTCAAGGTCTAG
>A01_1909521
GCAGCTGCAGACTTTCTGATGAGTTATTAA[C/T]ATTTCCAGAACGTTGTAGCTTTGATAGGTT
>A01_1910187
TCATGAGAGCATTTTTTACTACACTCTATT[A/T]TGAAGTAAAATATGGAATGCTCAAGATGTT
>A01_1910623
CTGTATCATGTCTTTGACTAGTTTTGGATT[T/C]TATCTTTGCCAGATCCTGGCGCCATCAAGC
>A01_1911001
TGGTTTTGCTGTCGCCATTTCTGTTGAGAT[C/T]GCCACTGGCAAAGGACTTCTTGAGGTAACT
>A01_1911257
TCTTACTGCGGTTTTCATCTTCCAATCTTC[C/G]TCTAAAAACTGATAGAAGCCTCTGCCCCAT
>A01_1911756
GGAAGGTTTTGTTTGGAATGAACAAATCCA[T/C]AGGAAAAAAAAAAGAAACGCACTCTGTGTG
>A01_1911882
GTACTTAGCACCAAGGAGAAGCCTCTGAAT[G/A]CATAAGAGAGCGTTCTTGGTAACCTCAGCG
>A01_1912302
AAGATGGCCAAGAAGAACCTCTTGCTTATA[T/C]TTGTCGAAGGAACTCAGCTTCTTGATATTG
>A01_1912613
GATGATATGTGGGAGTCCAAGATCAACCAT[T/C]TGGGCACCAAATGTACCTTTTGGAAGCAAG
>A01_1912955
CAAGTACTCTATTGCTGGTTCATAATAGGA[A/C]AGAAGCCAGATGCAGAGACATGTTTCGTAG
>A01_1913350
GATTAAAGGGACAAGTAACTTCACCCCATC[T/C]GCCTTAACAAACGATGATCTGACAACAGGT
>A01_1913476
CCTCAACTGCATTTCAAAATTAAGGATTGT[G/A]AAACCTATGGTTGACCTCAAAGGCTCAAAC
>A01_1914097
AGCAATGAAATCAAATTCTGGAACCACTGC[C/A]CCATAAGTGAAGGACTAAGAAATCAGGTAA
>A01_1914420
ATCCTCATGTGCCAAAGATTCATCATGGAA[C/T]AACCGAGCTCGTGTTGGGTTTGCTGGAAAA
>A01_1914567
CTCATAAATCAAAGCCAAAACATATTCCAC[A/T]GTTTCCTCCTTGAATATATCACGCAAGATG
>A01_1914633
AAACAGATGAACATAAGCTGGACCGTCCTG[C/G]AATAAACGACACGATCTATATTACTTCATA
>A01_1915516
CATTTTGGATTTCTGTTAAATTACAATATT[A/G]CCCCTACTCTTTCTCAATTATTACGATCCT
>A01_1915743
CATATCTTTTTGTTATACAGATATATCATA[T/C]ATGATATAGTAAATCTTTTTATACTTTAAA
>A01_1916286
TTGTCTAAAATATTTCTTTTAAAACTCAAA[A/G]ACAAGTTAATAAAAAGGCAAAGCAAAAGGT
>A01_1917628
ATGTTCGTTGTTTGTATATATCTAAATCCA[A/G]TATACGATATTGCAATATAGATATAGCCTA
>A01_1917681
ATAGCCTATTAGGTCATGTTATTTGTTCAA[G/A]CGCTTTTGTTTAATTAGATGTCGCAGAGAT
>A01_1917812
TAAGGCTGTGAAAGTTATAAACTTTTGTGG[C/T]ATCCCGAACGAGTTACATGTGCTGCAGTAC
>A01_1917952
TACTGACTGCAGCCGAGGAGTTTCAGAAGA[A/T]TGTCGAAAGAGGTTCGAGGCATTTGAGAGT
>A01_1918025
TGCTTGAACTTGATCAATGAAGCATTTTCT[T/C]AATCTTCTAGTGGAAACTGGAACTTGATCT
>A01_1918465
TCGATGGTGTAGTATAAAATTTGGCAGCAA[G/C]AGATGAATGGCTCAACAAGGGACAGACTAG
>A01_1921659
AAGTCTACTTTATTTATAAAGATATGGAAA[A/T]GGGATAAAGGCAAATAGTATTGAGAGAAGA
>A01_1921781
AAACAAGACATCCTTTTGTAGTGATGCCTG[C/A]TGAGACATCCAAACCCACTTCATTAGTTAA
>A01_1922005
TAATTCCTTACTCACATATTGATAAAAAAA[T/A]TTAATGATCCTCCCAATACTCATATTGACT
>A01_1922091
GGACATTCAAAACTTGACTCGCTGTTGTTT[C/A]TATTTTCGTAGATGCAAGCTTTGATTAAAC
>A01_1922252
GCCATTTTAAGGAATTATAATCATTTAGTT[C/T]TGAATGGAGAGATTAGAATCTCAATTTTTG
>A01_1922657
TTGGAAGAATATTTTCACTAAAATGCAAGA[T/C]TAACGTATGCATGTAATCGTTAATAAATGT
>A01_1923187
TTCATCTTTCTTCTCTAATATTTGTACCAT[A/G]TATGATGATTACCTTTACTGTATTACGACA
>A01_1925147
TTAAATAATTTAATAGAATCAAACCCCTTT[C/G]ATAGCTAACTATATATATATATATTTAAAT
>A01_1925657
GATTTGTCTGAAGGAGAGGGGCCATAGCGA[G/C]AGGTTCTGAAATCGCAGCTCACGCACCTCA
>A01_1925936
TTGACTTTGACTAAGCTAGAAACATATAGC[C/T]AAAATCTATATAGAATATAGTTCAGCCCGG
>A01_1925986
GTTCAGCCCGGATACTGCTGGGAAGTTTTC[A/G]TGTGTTTCGGACCTTCGGTTCAGGGTATGG
>A01_1926195
ATTATGGACAGTATCTTTGCGGGGACATGA[C/T]GTCGCTAATATTGAAAATCAAGAGGATACG
>A01_1926420
TCCAGTTTAAGTATTAATGAAAATTTTGGT[A/T]TGCAAAAAAAAAAAAAAATCTATTTATCGT
>A01_1926513
TTTTGATAAAGGGCTTGTATTATTTGATTT[G/T]CTCTGTAAATTTATGAAAAATCATATAAGT
>A01_1926574
TCGTTTTGTAAAATATTGTAAATTATGGAA[C/T]GACCGCTACATTAAAAATTACTTCATACGA
>A01_1926909
AGAGGAATGAAGAAAAAATTTATTTCTTAT[C/T]AATTTTAGTGAGAAACAAATTTGTTTTATA
>A01_1927120
GCACCAATGATTACTTTGTTTTAACCATCA[T/C]AGATTTTGCAGCTGTAAGCAGATTCAAAGA
>A01_1927282
CAATGCATGTGATCTTTGTCAACAAACCTT[G/A]ACTACTAAATACTTCTGCGCACCTATTATA
>A01_1927360
TAGTTTAAGATGTATACTAACTATGATTCA[G/T]TTCAATTAAATGGTCAAAAAGAGAATAACT
>A01_1928951
AAATGAATTGGAAAAAAAAAAGAGAAGGAG[A/C]AAATTCGTGTCACACGTGAATAAAGTTGGT
>A01_1929791
TGAAAATGTAAAAATTGAATTTTTTAAAAA[C/T]AAAATTTTTCTGAAAAATATGTATCTTTAA
>A01_1931372
CTCTTCAACTGCTTCTACTTCTTCTTCTTC[G/T]TCGTCTTCCCATTTCTCTTCTTCGCAGTAG
>A01_1931411
CCATTTCTCTTCTTCGCAGTAGAGAGCATC[G/A]AGAAGAAACGAAGTGTTATGTTCTTCTCTA
>A01_1931868
TTTTCTATTTTCATATTTTATGAATATTTT[C/A]TTTTTCTGTGTGTTTCCACTTTACCTACTT
>A01_1931946
GATCGAGAAACCAAAGTGCAGTAAAATCTG[T/C]CGGCAACTTAACTAAATCCCTACAACCTTT
>A01_1932738
AGAGATGGTCCAGAGTATGGTGGTGAGGAA[T/A]ACGGAGATGGAGAAGGCGGTGCTGAGTAGT
>A01_1932981
ACTTCTCCGGCATATCTGCAAGAAAGAAAG[T/A]TGATGCATATTCAGAAGCTGTGTAATCAAA
>A01_1933808
GAGAGTGTTGCTATTCCAGACAGCAACCTT[A/G]AGATCCTTAAGGCCTTCAAGCAACGTGAAC
>A01_1934364
TTGAATTTTCCCAGAAATTGCTTTCAAGAG[C/G]GACAAGACGCGTAGCGTAAGCCGCTGACGT
>A01_1956568
TAATCCATGCATTGTCAGTATATCATCGGT[A/T]TTTTAATCCGTTTTGGTTTTTGTAGATTCA
>A01_1956617
TTTGTAGATTCAAAGGATTTTTCATTCCCA[G/C]TATGAATTTGAATTTGTATCCAAATGCTTT
>A01_1956665
ATCCAAATGCTTTTTTTATATCTCTAAGAA[A/G]TTTTAAGATTTAGTATTTTCTAGAGACTCG
>A01_1958529
GGTTTGATTAGTGTAGACCTGGGGATTTTA[C/T]CCGGATCCGAGAACCCGAACCGAAACTAAT
>A01_1958899
CGGGTAAAAATTCGGGTGTTTTCGAGTTTT[C/T]GGATATTTCTTTCGGGTCTTCCGTATTTTT
>A01_1958930
GGATATTTCTTTCGGGTCTTCCGTATTTTT[T/C]GGTTTTTGGGTATTCAAGTCCAATTCAGAT
>A01_1958968
GGGTATTCAAGTCCAATTCAGATACTTCGG[C/A]TCTTAAATATCCGAACCGACACGAATCCGG
>A01_1959150
GTCTAAAACCCGAAGAACATGGATCCAACA[G/A]GAACCAATTCGAACCCGATAACCGAGCCAT
>A01_1959459
GTAAAAAAAGAGTTGTACCTATACGAAATT[T/C]CTCTCTTTCTCAGTATGATTTCTATCGTCC
>A01_1959680
TATATCTTTCCACTTTATTTTTACTTTAAT[T/G]TACTCCAATTTAGGCTGTCCACGTACCAGT
>A01_1960292
GCGATAATCATGGTCTTAGATCTAGTTGAC[C/G]AGAGAGTTTCGGTCTATTATAAATAGAGAG
>A01_1961352
GCTTACATCAAGAACGAGCAGTTGATAGAG[G/A]TCGCTGCAGGGTTAGAAGCTTGTGGCGCAA
>A01_1961583
AATCGGGTTAAACCGTTCAAAATTGGTTTA[A/T]ATCGATTTAAATTAGTCTAAATCCGTTAAA
>A01_1961872
CTGGAACTCGGTTCTTGAAGGAGTGGCTGC[A/T]GGGCTTCCGATGGTGACGTGGCCGGTTGGA
>A01_1962040
TGTGGAGAAAGCGGTGAGGGAAGTGTTGGT[T/A]GGGGAAGAGGCCGAGGAGAGGCGAGGAAGG
>A01_1964005
TGGTAAAAGTAAACAAGTTGGTGATAAGTG[C/G]TGGTGGGGGGAGAAACTCCTGTTTTGGCTT
>A01_1964103
ATCAGAAATAATATCTATCAAGCCTAAACT[C/A]CCAAGTACAAACCACAAAAGCCACCTACTT
>A01_1964434
CTGGATAAAGAAGTTTAAGAGAGGTTCAAG[G/A]AAGCGAGCTGCTCGGCTGCACCACCAGCAG
>A01_1964478
GGCTGCACCACCAGCAGCGACGCTCCTGAG[T/A]ACATCCATAGCCTCTGCAACTTTGTCCTTG
>A01_1964595
CATCCCAGTCACTTTGGCTGCAGACTCTGC[T/C]TCAAGCTGCTCCACCAACGGGTACAGATTC
>A01_1964642
ACGGGTACAGATTCTCACCCAGCATCTGCA[C/T]ACACACACACACACAGCAGAGTTAGACAAA
>A01_1964871
TCCGACCCCTTGGATGCATCTGATCACCCA[T/C]CCAAATCATACAATCAAACTTTTATAATAA
>A01_1964922
TTTATAATAAAGAGAGATGAGTAAGCCAAA[C/A]CAGTTTTTATTGAAAGAACCTGGTGCTGCT
>A01_1965060
TGAACCATAGGCATGAAGTAATTGGGTACA[T/G]GGCCCCTACCACCAGGTCTCATTCCAGGAA
>A01_1965610
TCCAATACCAGGACCACCAGGGGGAAACAT[T/C]GGCATGCGAGGACCAGCGGATGGCGGCATT
>A01_1966789
CTCGGCGAAAGCGCTCTTCAAGTCATCATC[G/T]GTAGTACTCTCCGCGAGATTCTTCACGTAG
>A01_1966837
ATTCTTCACGTAGACGTTGGTGAATTTAGT[T/C]TTGTTTGCGGTGGAGTCTCTTTCTTGTTTT
>A01_1967605
CCTTGATGAAAATGTTACCAGCGCCACTGA[T/G]GCGAACACTAGGATCACGATGAGAATACAT
>A01_1967657
AGAATACATAACCCTTATAGGTTTCCCATA[A/G]AGAGGTATGTAATTGAGTTCCTGGATTGCT
>A01_1967729
AAACACAGAACACGACAAAAAAAAGTAAGT[G/A]GCATTACACACAAAGGAACACAACATTTTC
>A01_1967956
ATCACCTACGTAAAGCGACGTCGTTCCGAA[A/C]TGAGTTGCCGGGGCCACCGTTGTCTGAACC
>A01_1968345
AGCATTAGGATATAAACCTAGTAGAGATGG[A/G]TTTTAGGAAGATCTCAGCCGTTGGATTTGA
>A01_1968417
AACGTAAGAGTTAAGATTGAGTTTGACTTT[T/C]GAGAGTTAGTTGGTGATAAGGTCGGAAAAA
>A01_1968675
GCTCATTCGTAACGTTTCTTTTAAGCAAGT[G/T]CTGTTCTTTCTTTAATTAAAAACAAGTTAG
>A01_1969120
AAAACAAGAGAAAATCCAATAGCAAGATCA[G/A]CGAATCTGATCCTCAAGGCTTACAGTTACA
>A01_1969568
AGTGACCAGTTTCCAACTGTTGTTTGGTTC[G/A]CCACCTGACACAACACTACTCTTTTCTAAG
>A01_1969759
CCCAAAGTTATGGAGCCTCCGACCAATGAG[A/G]TAACGGTCATCACGGATGGAGTTGTGAAGG
>A01_1969804
GATGGAGTTGTGAAGGTTTCTGAACCAGAC[A/G]TGGCATCTCTTTGCACAAAAGCAGAAGAGG
>A01_1970219
GATCTTCAAAAAGATGAGGCCAAGAGCCCA[G/A]TCTTGATACAGAAGGAAGACAGGACTTTCA
>A01_1970303
GATCACCAAAAGCTCAAACAGAAGTCCGAT[T/C]AGTACCGGAATGATAAAAACCTGTTCAGTC
>A01_1970427
AAACAACAGCGCAAAACCACTTACCCATAT[G/T]GCTAATAGTACCGAGCTCTTGAAGACAATC
>A01_1970728
GAGAACTGGGATGGCACTGAACAGAGCACG[T/C]CCGAGAGAAACTGGTACGACTATTAATGCC
>A01_1971171
GTCTGTCAAACCAAGGGCCCAACCGACGGC[G/T]GTGAACCAGCAGCGTAGAAGGGACTTGATT
>A01_1971302
TCTCAGTGAATGGGTCGGATACACTGCATA[G/T]ATCCAAAGTTAGAAAAGTTACTCAAGACAA
>A01_1971706
CCCTCGAAGAAGGCTAACGAAGATGCTTAT[C/T]TGCAGCATGTACATGATTCCAACAACCCAG
>A01_1972099
AACAGTCAGCGTTGTCACATCAGATAGCTT[A/G]GACGAACCTGTAACAGAACCTTTTAAGAGA
>A01_1972578
AAACACCGGACCCTGCATTCCAACCAGCTC[A/G]TCAAACGGAACATCTTCAGCACCATCAGCG
>A01_1972719
AGGATTCCTTCTATTGACCTGACCAACACC[A/C]GCACCCTGATCTCCAGCATCTTCAACATTC
>A01_1972995
GATGTGGCTTAAGAACAGCCTCTGAGCTTC[C/A]CCAAAGCTCCTCACAAAAGCCAACCGCCAA
>A01_1973064
CGTAATAAAGGGAATGGTGAGAAGCCACAC[G/A]GAAAGCACGAAACTCAACCGGAGAAAGAAC
>A01_1973130
CACGTGGCAAGCTTTCATCGCGATCCCAAC[A/T]ACAAACTCCTGGAAAGGGAGCCTCGTTGGA
>A01_1973369
CAAGAACCCTAAATAATCAATTTATAAACC[A/T]AACGGAGACCTCGCATTGACGAGCGTTGCT
>A01_1973415
TTGACGAGCGTTGCTATGATTAAGCCACTG[A/G]AGGAGGCAATCCTGATGCACGAACTTGATG
>A01_1973493
CGGGTACCGAAGCGGATTATCCGCTTCCCC[C/T]GGGTTTCTGCAGATCCTGCAAACGTCCTCC
>A01_1973634
GGCCTGGCTCGAAGCGGAGAGGGAGGAGGA[T/C]GAGGGAGAAGATACCGACGATTCCGATGCG
>A01_1973745
AGCAGAGGAAATCTCCATGGAGAAATCCGA[G/A]CTTGGGTTGACGAAGGGCTCTCAGGTGGTT
>A01_1975231
AAAGCTTAGTTTATGCTTTATGTGAATGAT[A/G]ATAAAGTTTTGTGTGTTCGTACCTGGTTGC
>A01_1975296
GAGCAAGAAGATATGGACTAGGATCATCAC[A/G]TTCTCTTCTCTCAAACTATAACATAAAATA
>A01_1975327
TTCTCTTCTCTCAAACTATAACATAAAATA[A/G]AATAAAATTCAAATATAATGCAAATTTTTA
>A01_1975460
ACAGACAATTAGATTACATAAACTCCCATA[G/A]TATGATAATCTTGCAAACGTATATAAAAAA
>A01_1975530
CACCACATGTTCAGTTCTTAATCTGTCATA[A/G]TACTTTGTTTTACGAGGCAGCTTCATTGGA
>A01_1975587
TGGAATGCATGCATTCTCCTGGGTCATGAC[A/T]GCTAATGCTTTAGAAATCTCGTCATCAGAA
>A01_1977929
TGTAGAAGATGCATCCGATTGATGAAAAGT[G/T]CTATCCGGCTTTGAAAGATCTCTCGTTCTC
>A01_1978476
GATTCATAAACGATAAGCATATGGAAAATA[A/C]GTAGAATATGAAAAATGAACATAATACAGA
>A01_1979243
TCTTATCTAATAATTTAAATAAACACTTTA[C/A]AACATTATCAAAAATAAAAGTTTTACCATC
>A01_1980949
TTGAGGGTTGTTTTTCCATATTTTGATGAC[G/A]AGATGTTTAGATAATTATGCTAAATATTTC
>A01_1980981
GATGTTTAGATAATTATGCTAAATATTTCC[C/A]AAAAAAAACAGAATATTCAAAATTATCATG
>A01_1981303
TTTGTCTATTAGTTATGCATAAGTTCATGT[A/C]TTTTTAGAAAACTTAATTATTGATATTTTA
>A01_1985132
TCGACAGACAGATAGTGATTCCATCACCAA[C/T]AGGGAGCATACAGATCTCGATCCTAGGGTC
>A01_1985684
TCATCTCTTCGATGGGCTCTATCTCAGCGA[T/C]TGTCACTTCTCCGAGTTTATATTCAATCTC
>A01_1986485
GGCTGTTCAGACAAACATTCAGATCTCAGG[A/G]GAGCTTACAACTAGCCGTGGACCAGGCACT
>A01_1986910
AACTAAAATTCAGGTTCTTATGCCGGTAGC[C/T]AATGGATCTGAAGAGGTTGAAGTGGTTACA
>A01_1987047
CCCAAGGCACTAAAATTGTTACTGACAAAT[T/C]GATTGGTGAAGCTGCTGAATCAGCATATGA
>A01_1987896
ATAAAGCAACATCAAGATCAATTACATCAG[G/C]AACATAAAACCAAAAGATGCTTCAAGAAAA
>A01_1988696
AAAATTTAAGTGGACACTCACTTGCTTGCG[G/A]GCGCGGGATCTTGCAGCTGATTCCCTATTC
>A01_1988855
ATCCATGTTGCTCTTTGGAGTCAGCTCAGG[A/T]GACATCTGGCTTCCAGGAGATACTGCTGCA
>A01_1988987
AAGAACTGAAGGCTTCACTTCCTAAAGGCA[G/A]AAAACAAACCATGGTCAAATAAACTAAAAC
>A01_1989519
TCCAAAGAACCCACCGTTGAAGCTATCCAC[C/T]CTCTCCACCTGTTGAGGCTCTTCCCTAACC
>A01_1989666
ACTTCCAGCGTCATCGTCCTTCATCAGCTC[T/C]TTCCAGACATCATCAACTCTTTTCTGACTA
>A01_1989741
AGTAATTGACCCTTGTCTCTGCAAACCCCC[A/T]CCAACACCAATCTCTCCTCCCACACCAACA
>A01_1990015
GGTTGCTTTGCGTCGTCAACGAAGTTAAAT[T/C]GAGAACCCATCTCTTAAAAATTCAAGCTTT
>A01_1990679
CGGATGATTTATTTGGTAGACGGACATTAT[T/A]AAAGCAGGTCTTTTCACAATGTTAAAAATG
>A01_1990905
AAAACAAACAGAAAAAGAGAGAATGTTATA[C/A]AATTTAAATGAATATGAATTATTATACAAT
>A01_1991172
CACATGTGATGTGATCTTCTCTTTAATTTA[T/A]TTTATCTTTTTCATTTTCTTTTGTTTATTG
>A01_1992533
TGATAAGAAAATAATCCCAATTAAAATTTG[A/G]TAAGATTTCATAAAGTTACATATTCTATAA
>A01_1992974
ACGGACATAAGTAGCAGATATTTTTGACCC[G/A]ACCACTGCCACGCCAGCAAGTGCATTAAAA
>A01_1993115
ATTTCTAGGATTTATCCAATAAACTTCTAA[T/C]TATCATTTATTTCTAGGATTTATCCAATAA
>A01_1993405
TTTATCCAAGATCTAACCAAATCTGATTTA[G/A]TTTAATAAATCCTAAAAGCAAACATATTAA
>A01_1994817
ATTGGCTTTTAGAAGGCTTTTGCTGCAGAA[G/A]CATAAGAGTTGATATGACCTGTGGGGGATC
>A01_1995335
AAAAAAAAGGAAGCGTGCGAGTGGAAAATG[A/G]ACGTGGAGGGTTTTGTTTTGTTGTATAGTA
>A01_1995554
TTCAATAGTTGTGTGTTATTCTGTTCTACT[C/G]GTTAAAATATATTTAAGCTAAGAGCATGTA
>A01_1995779
CCATTGTCAGTTTCTTGACTCCTGGATCTG[T/C]AGAGTGGTCACAGTCACAGCACTATAGCAT
>A01_1995869
CGTATCTTGCGGCGCACGGAAAGTAGTGAG[C/A]GACAAAAACAAGGGTTTGCGTTGTAGCGTG
>A01_1995955
CTCATTTTCAAGGCTGTGTCCTGTAATAGT[T/A]ACCGGTTTCTTCTTAGGTCTATTTTGCTTG
>A01_1996684
GAATTCGAACCGTTTCTGCGGTATCATCCC[C/T]AAGAGCTTCGAGAAGATGAAGCTGATGCAT
>A01_1996966
TGCTAACAATAAATTCACCGGATGTATCCC[T/G]AAGAGTGTCGGAAACATGAAGAATCTCAAC
>A01_1997038
TATGGACAATGGTTTGGGCGGTTGTTTCCC[G/A]TCTGAGATTGGAAAGTTGTCGAATGTGACA
>A01_1998025
AGCTCCAGTGGAAGAGAAACAGACGCCGCC[C/T]GCACAAGCACCAGCTCCGGTTGAAAAGGAA
>A01_1998310
GGGCTACTGATATCGATCGAAGAGAGAAGA[A/C]ACAACTATATCATCTAGGAGTAACAATATT
>A01_1998650
TTGCAGAATTTTTTTACAATGTACTCCTTA[C/T]GTTTCTAAATAATGCATATTTTAGAATTTC
>A01_1998781
AAATTTAGACCAATAGAAATTCAATAAATA[C/T]AAAATTGTCAATTAATAATTTTTGAAGTTT
>A01_1999135
CAAAACCTAATTATTTATAAAACATATAAG[G/A]ATATTATAAGAGATTAATAATTATTATAGA
>A01_1999704
CTCAAGTGATTTCTCGTTTAATATATAGGA[T/G]AAATTTTTTATAAACTCTTATAAATGATCT
>A01_2001078
ATGTGATTTGTTTGTGTTGCGTGACTTGCA[G/A]TTGCATGCGTCTTAATATATAAGCCCATAT
>A01_2001865
AAGGTCGATAAAAATTCTTTATTGATAAAA[T/G]AAATTATTTTTATGATAATGAAAGAAGCAA
>A01_2002713
CTATCCTTTTTATCACCATGATTCTCTTTT[T/C]TCTCTCTAGTAGTAAGTCTTGTTTTCTTCA
>A01_2002939
AACAGAAATAATAAAATATGGATAACAAAT[A/T]AAAGAGTTATCATTGGTGTTCTTTTCCTTA
>A01_2003196
CAGTAATGAACACTAGTAACTTTAGTGTCA[G/A]ATCTAAAGCGGATATGGCTGGAGATTCGAT
>A01_2003370
CTGTAAATGAATATATGGGTTGTCGGATCA[T/G]ATTTGTATCGACTCGTGCAGGCATTGAATA
>A01_2003759
GAGATAAGTTCTATTAAGAATTTGAAAATG[C/T]AGTTGAATGAGACGAAATTTCATATAGATT
>A01_2003931
TTCAACCCACTAGGCACGCGCTCTCTTTAA[A/G]CGACCGACAGTATAGAGAGATCAAAGAGGT
>A01_2003969
CAGTATAGAGAGATCAAAGAGGTGTATGCA[C/T]TTGGATTATCACCCTAATGATTGTCCTTCT
>A01_2004631
CCATTGTATAAACGTGTTATGTATATCTAA[G/A]CAAAATATGTGAATATGATAAGGTTTGGTT
>A01_2004701
ATCATGATCTAGAAAAGCATATCTTGAAGA[C/A]ACGCTAAAATTTAAGATATAAATAAGGATG
>A01_2004757
GGATGAGTTCAACAAAAAGAGGAAAGACTT[G/A]CAAGCACCAAGCGATAGATAACATGTCACG
>A01_2005002
TTTTTTTTATATCAAAATTTGTAATTATTT[C/A]AAAAAATATTTAGAAAAAGGGGAAGCTGCA
>A01_2005224
AATGTGAAGTAGACATTCTAATCTTATATA[T/C]TAATATACTATCGGGTTTACTATTTCTAGT
>A01_2005297
TCCTAGTTAGAACCTAATATTAAAAAAATA[G/A]ATCAATTTACTCAATTCTAATTTCATATCT
>A01_2005359
ATTTCAGCTTAATTATTTATCTATTTTTCA[G/A]AGTAAGTAACCTTAAATTTTGCATTACCCT
>A01_2006487
GATATGTGAACATAATCAGGAATAGCGTAC[T/A]GAACATTCAAGATTCTCTGAGAAAGCAACA
>A01_2007205
GTTTGATTTTAACAGAGGATCTAAACTAGA[T/G]CATTTTCTCATTACCATAGCATGACAGTAA
>A01_2007898
TCTCACCTCTCTCGATGTATTTGACAGCAA[G/C]AAGCTCGTTACTTAGCTTGTCTCTCATCAA
>A01_2008239
GTGATGATGATGATGAAGTTTATGGGTGTG[G/T]GAAAGAGACTTTTTGAGACACGTGAAATCT
>A01_2009286
TATAAACTGTGAATGGGTCTCCACATGACG[C/A]AATTATTTATTTTAATCTTATAAAAATATA
>A01_2010496
TCCTCTGTTACAGGGAAAACGTTAACATAC[T/G]CTACTGTCTAATAGAGGTAGCAAAAACTTA
>A01_2011418
TTCCTAAACGCCTCCGTGCTCTGAATGTCT[A/G]CAATTAGATAGTCACATGATCAACAAAAAA
>A01_2011512
ACCATGGATCAATACAGCCAAAGCTTTCAA[G/A]CACGGCACAACAATGGCGTTACTCCTAGAG
>A01_2012371
AATACAATACTGTTTATTTTTAAATCTTTG[A/T]ATTGTTTGATAATAGACGAATATACTCAAT
>A01_2012469
AACGGTTTTCTATGATCTACCAAACCTATC[C/A]ACAATGAACAAACGTTTGCTTTCTTCTTCA
>A01_2012697
CACTATTCTGAACCCTCCTGTACAAAACGG[G/T]GAACATCAGTCTTTTAGAAAAAGGGTTTGG
>A01_2012808
GAGGCATAGGCCAGGAGAATCTCAATCTTG[C/T]GAGGCAACTTACCCGTTGGGATGAAATTAA
>A01_2012855
TGGGATGAAATTAAACTCGGTGGCAGTGTA[A/G]AGGGTACTCATCAACATCTGCAACACAGAA
>A01_2013073
ATCCGGATCCATAATGTGCCACACCATTCT[C/T]TTCATTAACAAAGGCAGCTCCTGCACTTTC
>A01_2013255
ACGGATCTTAGCAAGAACCTCCTTCACCTC[C/T]GGCTCTTGGCGCTGTTGCAAGGACGCTTCC
>A01_2013418
ACCACAACACTAATAAACGAAATTGGACTC[A/C]GAAAATTTTATTAAGGAAGGAGTTAAAGAT
>A01_2013735
CGCGTTCTTGGAAGATTCTTGTTTTACGAA[A/C]TGAGTAAATTAGATTGAATTTTCAACAGCT
>A01_2014334
GATGCTTACACTTTGCCAAAAGCAATAAGT[A/C]GAAAAAAGTCAGTAGCAGTACTAAAATTCA
>A01_2014367
AAAAAGTCAGTAGCAGTACTAAAATTCAAA[C/A]CTCTGATGATTAAGAATCTTACACATTGTT
>A01_2014654
CTTGTCGATTATTCTGGTCGCTTTCTCAAG[G/A]TTCTTACCAAACAACAAATGCAAGCTGAGT
>A01_2015031
AAGTAAAAAATGACGGATCATGATGGTGAA[A/G]TACCTGAGCCTGTAGATTCGATGTTCGACC
>A01_2015587
CCAGTACAACATAAAAATCTCAAAATCTTT[T/C]AGAAAAAAAAAACAAACGACTTCAACTGCA
>A01_2016151
GAAAAAAACAATACAAAATGAGAGAGGAGA[A/C]GAAAAGGTCGTTCTTACCAGGTGCGGGAAC
>A01_2016608
TTGGTTATTTTGGGTTTAAGCCTGTTTAGG[A/C]TAGGACCGGTCCGAAAACCCGAAAATTTAT
>A01_2016837
TTCTTTTATAACATGTTTTTTTTCAACATA[G/C]AAAGTCTGAAACGTTCGACCATGTTTATCG
>A01_2016914
CTTATATATTTAATTTTAATTTATATTTGA[C/T]TATTTCAATCTTATTAAATTTGGTTATTTT
>A01_2016960
AAATTTGGTTATTTTATAATATGTTTTAAA[A/G]CATATGAAAAAGTAAAACGTAAATACATAG
>A01_2016991
CATATGAAAAAGTAAAACGTAAATACATAG[G/A]AAAAGTAAACATTTTTAATAAAGAAGAAAA
>A01_2017058
ACTCATTTAATATTTTAAAACATAAAGTTG[G/A]AACTGATTTTTTATGAAAATTCACATGTAT
>A01_2019461
TGATTTTTATAACCTGTGCATAGTTTTGCT[C/T]AAGTCTCCAACTACAAGGAGATGGAAACTG
>A01_2019673
ATTATAATTTAATAGGAGATGAAAATCCAA[T/A]GTCAATTTCTATAGTTTAACAAGTTACAAA
>A01_2020512
CATCAAATAATTGCCTTTTTTTATAATATG[C/A]TAAACACTTAAACAGAGATATATGTTTTAC
>A01_2020660
TGTAAGATCAGCTGAAAGAGACATCTTCTT[G/A]TTAATAGACCTCATGCATTTACCTGGGTAA
>A01_2021756
ATTAACTCTGTAAAATAATCACTAAAACTT[A/C]TTGAGTATTGGAAAAGACGAAACTTTGAGG
>A01_2024113
TATTTGAAAGTTATCTTTTAAAGATTGAAC[T/G]CAATGGAGTAGTTGAAAGCTTTTGTAAAAC
>A01_2025990
AATCATGCAAACGATTAACACATGCAGATG[G/A]TAAATAGGAATCTTTGCATGCATTTGTTTT
>A01_2026523
CCATTTTTCAATAAACATTTGAGCCATTCT[T/C]TTAAAATTTTAGATGTTGATGTTTCTTGGT
>A01_2034435
TCTATATACAATGCAGAATCATGAAAAATG[C/T]CTTTATTCAATTAAATGTCTAATTACGTGT
>A01_2035354
TCGCTTTGACCCATGCACCATCTAATTACT[T/C]CCACTAATACTACAAATTAACATAAATAAA
>A01_2047119
TATTTTTTTTGTACATGTTCTTAATCAAAT[C/T]ACAGTTGCAACTAGTAAAGCAACTTTAAAA
>A01_2048902
AAGAAAATGACTAAAATAACCCTGAAATCT[T/A]TAATTTTAATTTTAATTTTTAAAATTTTGA
>A01_2054502
TTATAATCACATTTTTTCTGCAATTCTTTC[A/G]ATCTCTGTTCTGCTATAAATATTTGATTCC
>A01_2054545
CTATAAATATTTGATTCCGAGTCCAATCTC[T/C]ACCTCAACATCATTCTCACAAATCTCATTT
>A01_2054605
TCTCTCGAAGTTGTGACCTTTACGGTAATA[A/T]AGCTTCGGACTTATCTCTCTAGCTCCCCTC
>A01_2056252
AAAGCAAATGGTTGTCTTGAAAGATTCAGC[C/A]TCTAGTGCCGATAAAGTTGTGGAAGCTGGT
>A01_2056531
TCCGCCTTTAGTCTTGCAAGAGTTTGTTAA[C/T]CATGGTACTATTTGGTTTTAAGTTACACTT
>A01_2056810
TGTTGCTGAGCTGCCTCCAAAGTCTTTCCT[C/T]GAGGCCCTTGTGAAAGAGCTACGAACCTTA
>A01_2056988
ACATGGGAGCAAGAACGTGTTTTATGTTAT[C/T]GACGTCAATTACTTTCCTGGCAAGTTTTGT
>A01_2057130
GATGCCAGATTACGAGCAAGTGTTTGTAGA[C/T]TTCTTCCAAAACCTGGCGCAGGCCAGACAT
>A01_2057365
TATATAATTTATAGACAAGTTGCATTGTAG[T/C]ACTCATTTCAATCAAAATCCTCAGTTTCGG
>A01_2057485
AACAAGTTTTTGATTAGTGATCCTGAAGTT[G/T]TTTTTTTACTCTTTCTGTATCATATTAAGT
>A01_2057561
TGCATAAAAATTAAGAAAATACAAAATTTA[A/T]ATAATTTATCTTGGTTATATAATTAGTCAT
>A01_2061385
CAAAATCCTCAATTTCGGTTTAGCTAAACC[C/A]AACAAAACCGATTTAGTTGGTTTGATCAAT
>A01_2061599
ACGCCGCCGTTTCATTCCTCCTACCCAAAC[C/A]GAGAAGCCTACCGCGAAGAAGAGCCTTCTG
>A01_2061892
TCAGCTAAAGTTTTCAACTTTAGTGTTAGG[A/T]CAACGATAGATTAGTGTTTAGAACTTGATT
>A01_2062072
TTTTATGCTAAGTTGATGTTTGAAAGTTTT[A/G]TAATTTTTAGGTTAGGACGCTTCCGGATGA
>A01_2063471
GACGTATGCTGATGCAATGGATCGATATGG[T/G]TCAGATAGACCAGATACAAGATTTGATCTT
>A01_2063789
TGGAGCCAAGGGTCTGCCTTTCTTGAAGGT[G/C]TTGGATAATGGTAAGTAGATATATCATGCC
>A01_2063828
TGGTAAGTAGATATATCATGCCTATTTTTT[T/C]TCTCTGTCATACTTTGTACATTCAGCTCTG
>A01_2063879
TTCAGCTCTGATGAGGTTTTAAACTTATGA[C/T]GCAGGCGATCTCGAGGGAGTTGCAGCATTA
>A01_2064642
TCAATAACTTGATGATTATGATGATGCTGA[A/G]CAAGATTGTTCAAGCATGGTTGATGAGCAT
>A01_2065086
GAATAAGTGATTATAGAAAACAAAATATAT[A/T]TTTTTACCCACAATAGCATTTTTAAGTTGC
>A01_2065625
AAAAAAATCTCTATCAAATTAAAAATTATC[G/A]TCTATATATCCAAATTATGTTTTATATTTG
>A01_2065707
GACTGTCGTCAATTGTGGCTATTTATAACC[G/A]GTATAGATGATTAATTCAAATCTTAGTCTT
>A01_2065740
ATAGATGATTAATTCAAATCTTAGTCTTAA[C/T]TCAAATTGGAATCAATAAACTTAACAAGTC
>A01_2066410
TGGAGATGCTTTGTTGATTATGGAATGAAG[T/C]AAACAATTAATAATTGTAAAAAAAAATAGT
>A01_2066752
TAAAAAGAATTGATCCAAATTCTTGTCTTA[T/C]GTTTGCAAACTAATTAAATTCGTTTTTTAA
>A01_2067784
CCTCTCAGTTCAGTTACAGCATTAACTGTT[T/A]TCTCCGCAGAATCTTTGCTTTCAGCTTCTC
>A01_2068077
CTTACTTTGATCTTGTTCATCAATATCATC[T/A]TCTTCTTCATGTTTGTTTTCTTCCTCATCC
>A01_2068236
TCTACTCTTGCTCTCTTTCTCTTCTTCTTC[T/A]TCATCCTCCTCCTCTTCTTCCACACGCTTC
>A01_2068401
CTCATAGAGTTCCTTCTTCTTGTCATGAGA[A/G]TACTTCACTTGATAGATTAGCCAGATGCAA
>A01_2068636
CAGCCTTTACAGAATAAGACAAGCAAATCA[C/G]CTAAATGAACATCACAAGATGTGACATGCA
>A01_2068671
ATGAACATCACAAGATGTGACATGCAAAAG[A/G]AAAAGACCAATTGATTGCAACCATGATGCA
>A01_2068882
CAAAACAGCTTAAAGTTGTATATAATCAAA[C/A]CAAGAAGATAGAACCCACAAAGAGTATGAA
>A01_2069488
ATTTTCAAAAGAAAATACAGCTTCTGGCAT[T/C]TAAAAACTGAAGTGTGTGATGCTTATTCAA
>A01_2069532
GTGTGATGCTTATTCAAATTAATCGTATAT[A/G]ATGATGATTATTACAAATTAATCGATTAAG
>A01_2070216
ACCCTTACCACAACCGAGCCGAGCAGATCC[C/A]CGCCACACGACCTGCGTGTAGTGTCCACAA
>A01_2070356
ACATGTCTCCACTTCCCATTGCAAGGTTCT[C/T]TCCATATGGTCCAGAGGAATGCTCGAGGCT
>A01_2071580
GACGTGCCTTTACAGACGATGTCAAAGTAA[A/G]AATATTAATTATTGCAAATAAACGTTGTCC
>A01_2071825
GGTTTAATTAGATAATTCAACCTTTGTTTT[T/C]TGAATATATAAGTTTTTTTTGATCAACTAA
>A01_2072772
CACACTTTGTTCCAAGCACATGTGTTGGAA[C/T]CATAATCGTAGTCAAATTGCTCCTTCACCC
>A01_2072842
CTGCTTCGACGCCTGACAGGTTACCGCTGC[T/C]CCAAGCGATGTTCTCTCCATAGGGCCCACC
>A01_2073005
CTCGGCTCGGGCTTGGTTATGAGCTGCCAA[A/G]AAGTCTTGTGGCCTGTCTTGGGCTCTTAGT
>A01_2073600
ATAGATAGCAAAAAAACCTATGTTTAAGAT[G/A]TGGTGATGTATTTAAAAATATAAAAAAAAT
>A01_2073744
CGAATTTTTTTACTAATACTTCAGAGAAAT[A/G]AGGAAATTCTTAAATTATATGTACCACATA
>A01_2073820
CACATCGCTGCATTTTTGTATCTTCTCATC[A/T]ATGGCGGCCAAACAATCTAGATGATACAAT
>A01_2075978
TAAATGATTCATATTCTAGAGAAAACTTTT[A/G]TTTTAAAAAAAATATATTTTATATTTTTAA
>A01_2076495
TACACGTTCAGATTTACAACGACGACATAC[C/G]CAGAAAAGCGTTTGGTAGTGGGAGAATCCG
>A01_2078794
GGCAGTGCGACAAAATTCACCCCTTACCTT[C/G]TAAAGATGCTAAAGACGGTAAGCTGTTTAC
>A01_2078868
AAATAAATGGTCTTGCTGAGTTTCAAGTTT[G/C]AGAATCTTTGCTTTTGTGTCTTAACAGAGA
>A01_2079299
AACAGATCACCATTTTGAAGACTCGTGACA[A/G]TGTATGATCACTGATACTGAATGGTCATGT
>A01_2080372
GCTTTGTTTGCTGCATGGCGCAAAGGAAGT[A/C]ACCACATAAGAGAACGAACTAAACAAATAT
>A01_2080490
GGTGAGAAACCTAGAGTTAGGTCGATGCCT[A/T]ACATTAGGCTTCTCAAGATACGCTCGGACT
>A01_2080610
CCGATTCTCAGTTTCCAGATCCATCTAAAA[G/A]AAAGTTGAGACCTTTAAATCTCCCAAACCA
>A01_2080720
CACTAAGAATCATAAAGCTTTCGAATTTAT[G/C]TTCTTACGACTCGAAATCAACGAGAAGACA
>A01_2080944
AGAAGAACAATTGAAATTCGAGAATTTTCT[C/G]GTAAACCGAACCAAACCGGAACGATTGGAG
>A01_2081199
AGTTTTAATCGCAGGTGCGTTGACTTATTT[T/A]TTCTAGGAGGATGCATATGAGTTACACGCT
>A01_2081353
AAAGGTGATACAGTAAGTAACTATAGTTAC[T/A]TTAGGCTTTACTCTCCAAGTAACCATAGTT
>A01_2082033
TAAAGAAAAATGTTGGTGTGTACCAAGTAC[G/A]ATTTGTTAAAAAGTTTGCAGTGATCTGACA
>A01_2082093
ATTTTGAATAAGCCACCTGTGCAATGCGTT[A/T]TATTATCCTCTTTGTCTCTCTCTCTATATA
>A01_2084806
TTCCGCATATGCAATGTACATGTCTGATGA[C/T]AACCCACGCTCCATTTTCGAAATCCCTGGA
>A01_2084967
ATAGAGAATTATTGTTTAGGCGGGTGCCTA[G/A]ACCGATTTTTAGAACACTGGTTTTATTTAA
>A01_2085148
CCCTGTAGCAAAAGACTTCAATAGAATTGT[C/A]TGCACTTGTTTCAACGGCGCCTCTAATCTC
>A01_2085337
CAAGGTGGTTGGGTTCTACAAAGAGAACAC[G/A]AACATAATCATAGACACATTCACTTCTCTT
>A01_2085433
CGTTTGGGTTCACTTCCCGAACCAAAGCTC[G/A]TGGGATGTGTTTGCTGAGATTCTGGAGAAG
>A01_2085490
GAAGACTCATGTGGTTACGACTCCAGGGAG[C/T]GGGTTTGGACCTGGAGGTGAAGGGTTTGTT
>A01_2085532
TGGAGGTGAAGGGTTTGTTCGTGTTAGCGC[C/A]TTTGGTCACAGAGAGAACATCTTGGAGGCA
>A01_2086046
TTATTGTTTGTTGTTGTTGTTGGTAACTGC[T/G]GAATCAGAGGAGGGGAGAGCATGAACATCG
>A01_2086111
TAATGGTGCCATTTGGCGAGTCTAAAGTTA[T/A]AGAAAATAGGAGGTTTTGAGTGCAGGAGAT
>A01_2087235
GGACTATTTTTGTTTCTATAATTAGCTTTA[G/C]CAAACTTTAATACAAGGTTTTGTAAATTTA
>A01_2088083
AATTGATAGTAAAGACACTGATTTTTGGAT[C/T]GTAAGAAAGTAAAAAATGTTGATCTAAAAA
>A01_2088172
AAAATGTTTCAAGTCTCGCTCCACAAAAAA[A/T]TATATCGAAGAGTGAAATAATGTATCACTT
>A01_2088266
AGAGTGAAAGGGTTTGCTTCCCATTGTTGT[A/T]GCAGGGAACTATATCAATCTTCTTCACTCT
>A01_2088306
TATATCAATCTTCTTCACTCTCTTAACAGA[C/A]AAACCCAATGCAGACTCCAAAACCGGTGTC
>A01_2088871
TCTTCAAACAAGTTCTCCCTGCACCATATG[T/A]TACAAACTACCCATTAATAAGAGACTATCC
>A01_2088917
AATAAGAGACTATCCAAACACAAATGATGA[A/G]GCCTCAAAACAAGCCATTATCACCTGTAAA
>A01_2089086
TTGAGTTGCTGCAAGTAACTCTAGTACGAA[A/G]CACATACCAGGAAATGCATGATTGCTTTTG
>A01_2089223
ATCTTCCTGTTCTGAATGGGTTTCGGATGG[C/T]CTCAAGACAGCTGGGGGCTTTAGGAAAGCA
>A01_2089347
CAGAAGACACACCTCCTTTAGATAGATCAT[C/T]GATAAGTTCTGAGACATATCCTCAACAGCT
>A01_2089521
GTATCCAATAAAACCACAGTTAATCTCTAG[C/A]TCTTAAACACATAGATACATCACACAGCCA
>A01_2089571
TCACACAGCCAAAAATCTTCTGAAACATGC[T/C]AAATTATCTCTTGCATGCAATAGAAAATGA
>A01_2089787
TACCTGATCAGGGACAATTCCATTAGCTTG[C/T]CTGCCGAGAAATGATCGAGATTTCACCTGG
>A01_2091403
ACTTACCGTGGATTCTGTAATTTCACCATA[G/A]CTCTGATGTTCCTTAGCTGTGGCAACCAAA
>A01_2091621
AAAATAATTAGTACATAGATCAACTTTCAT[A/G]ATAAACAATGATCCTGATTGTCAGAGATGA
>A01_2092201
CTCCTGGCAACGGTTTACAACTCCCACATA[A/T]CCAAGTCGTAAAGGAACAACTTTTCCAAGA
>A01_2092317
AACAACGACTTTAAAACACATGAATTATAC[T/C]ACATGATAGAGGCAAAATAAACAAGTTTAG
>A01_2092387
ATTCACCTTTGTGATAACACCTATTGTTCT[A/G]TGACCTGGAGACAGTTAAGATTAGCAACAT
>A01_2092504
GTACAACTTACCATCAGGATCAGCGTTTCC[T/A]GCAATCTGAAGAGCATCAGAGTTCGCCAAA
>A01_2092615
GTAAGACAAGATCATGGTTCTAATACGCGC[T/C]TCAATATCAGTCGGCTGGTCACCCACAGGC
>A01_2092663
GTCACCCACAGGCACCTTAGTGATACCAGG[G/A]AGATCCACAAGCGTGATATCCAACACATTA
>A01_2092813
ACTTTCCACATTTATACCACAAAAGATGTT[G/C]ACTTTATACATTTAGACCACAAAAGATGTT
>A01_2092973
ACGAATCTCAGCGAAGTCGTAGATACGGTT[G/A]TTAGGGAGGTGAAGGAACTCTCCCCACTCG
>A01_2093087
GGGGCGGCGAGTGCAGATGTCGTTGCCGCG[G/A]GGGAGAAAGTCTCTGCCGACGAGGGCTTCG
>A01_2093452
GATGAATGATAAAGATCAAGACTTGTTATT[C/A]TTTTTTTTTAATACTAATATATCTCGAGTT
>A01_2094097
CAGATCAGATTCAGACATAAGTGTTGGTCT[A/G]GAGGTGAGAGGAGGAGAAGACAGATCATCA
>A01_2094137
GGAGGAGAAGACAGATCATCATCATCATCA[T/G]CATCTGTCATCGAGCTTAAAGGTCTCTGCT
>A01_2094793
TGCTTCTCACTCTCCCTCTCTTCAATTCAC[G/A]ATATAAAGGTATTAATATTATTTGAGAAAT
>A01_2094887
AACCTTTGCTTCTTCCATCTTCCTCGTTCC[A/G]AAAACGACGTCGTCTCCAGCATCGAAGCGC
>A01_2095536
AGCCGATCCTTTCCTCGTTGTTTGCAGGTG[T/C]TTCAGCTTCGTTACCTCTCTTATCGCCATC
>A01_2095593
CATCCTCTGCGTCGTCGTTAACGTCCTCGC[C/T]GCTATTCGCTCCTTCCGAGATAGCCACGAT
>A01_2095954
AATTCTTTTTATTTGGAGTGTTTGCTTCAG[C/A]CAATTCAAGGCCACGTGTCAAGATTTAGTG
>A01_2096455
CTTTCTGAAGCGTGCTCGACAGCAGAAGGA[A/G]ATTTCAAGAGAACAAGCTGTCAAGGATCTT
>A01_2098344
TGCTCAAGATAATATCATTCTCGTTAGAAG[C/T]AATACCTCAAGAGAAAGGAGCTGCATATTT
>A01_2098392
GAGCTGCATATTTGATGCCCTTGATAAATC[C/A]ATTGTTGTGTTTCCTTGCCTCGCTTTCCAC
>A01_2098660
CCCCTATGCATAAGGTTTACTCAATACTAT[C/T]TCCGGAGACTAGTTTCAAATGTATTGTGGA
>A01_2098740
AATGAAACGTTGTAGAGCTTACCTCGGAAA[T/A]ATGTTTACGAGACCACCCTTGTGGCTTCCT
>A01_2099817
ACTAGAAGGGAATCAGAAACACATTCATCA[T/A]ATAACATGCCTTCAAAAACTAATAGAACAA
>A01_2100102
TCAACAACAATAAACTAAAAGTCAGAACCT[G/A]CCATATGTTTTTCCTGTCTTAGTAACTTTT
>A01_2100137
ATGTTTTTCCTGTCTTAGTAACTTTTCTCT[C/T]TCATTATCTTTCTCCCTAAACCTTTTATAG
>A01_2100249
TTTTTACAATTGAAAATTTCCAAGAATCTA[T/C]CTAGCTGACGAGGAAACAACTAAACGTAAG
>A01_2100538
CTACTTCTTTAGACCATTTAGCGTCATAAA[G/C]GGAAAACTTTAGGAGATCAATGCCTGTCAA
>A01_2100597
AAGCATGGGTGCGGGTGTTAGTTAGACTGG[C/A]GCTAACGTTGTAAATATCAAAACTACCAAA
>A01_2100828
ACCACGGCAGTCTCAAGCTGAAAATTTACA[A/G]CTCAGGTATCATAAGAAAACCCATCAACCC
>A01_2101298
TTGTGGCTTCTTCTCCATTTGAGGCTGAAA[T/C]AATTCAGAAAGCTTCTTTAGAGCAAGCAAC
>A01_2102880
GTTTGCTCTTATATAAACCCAAAGACTAAT[A/T]GGAAAAAAAAAGAAAACAATCAAACAAAAC
>A01_2103008
CATGGCTCTCATGTTCTCTTCCATGATCAC[T/C]TCAAGCCGCGCCACAAAACAGCTTACCAAG
>A01_2103047
CGCCACAAAACAGCTTACCAAGAAACAAAC[G/A]TTAAAACCGAAGTTTTTTGGACATCCTTTT
>A01_2103772
ACACAACTGCAGCAAATTAAACAAACAATG[T/A]TTCCATTCCAAGAAAGTGTTCTCTGATGTC
>A01_2103988
CACTTTCTCTTCTATCCACGGATAACCAAG[G/C]AGTCTTTCTAATGAATGGTTTATCGATGTC
>A01_2104155
ATGATCAAAATGGAGGTTTGAAGCAACAGC[T/C]TTTGTGCTTTCCTTTGCCTTCTTCCCCACA
>A01_2104188
TGTGCTTTCCTTTGCCTTCTTCCCCACAAT[C/T]ACCCAGTTATGTATGAAACTTCTGCTTACA
>A01_2104512
GTATCTATATACAACTGTGAGAGATAAGAA[C/A]CATACTTCAAGAGTATTCACAGAGAACTGG
>A01_2105373
CACATAAATTACCTGAAAGAAACTGGAATC[C/T]TCAATTGGGTTTTCTCAAAGTCCTTTACTT
>A01_2106297
CATGAACAATGGTTGTACATCTCTATAATG[C/T]TCATTCCAGATTCGTACATAGTTAGATGGT
>A01_2107840
AGAAATAAGACGGCACCTGAAGAGCGTTCA[T/G]CCTTTCTTCCTTACAGGTTGGTTGTTTAAT
>A01_2112068
GAACTGTTCATCAATATTCATAGGACCACC[A/T]AAGGACCCACAAGTCCTGAGCTTTCTACAA
>A01_2112251
CAAAAGAAACAAACTTTACTTACCAACATA[A/T]ATATCCCCTTCTACGTTCTGAGTGCGTCGT
>A01_2112345
CTAATAGATCCAAACGCTCTCCTTCCCGTT[G/A]AAACCAAAGAGGAAACTTTCGATGAAAAGA
>A01_2113322
TAACTAAACCGGTCTTTAATTGAACCACGA[T/A]ACGACACGTGTAAGCTTCTTCCTCATCCGA
>A01_2113458
AACCTTCCCGCGTCACTGATCCTTTTCTCT[T/C]TCTCCCGATGTTTAGCGTGGAAGAAGGAAG
>A01_2113630
CGACGACGACGACGACGGGTACGACGAGCG[C/T]CAGCACGGCGACGTGGATTCCGACGAGGAG
>A01_2114034
ATTGCTCCCTCTTGTAAAGTATGTGTTTTT[T/C]GTTCTTTGGGCTAATGACGATGGTGAAGGT
>A01_2114435
CCTTGTAATGTAGTCAGATGTGTATGAAGT[A/T]ACATGTGATCTTCCTCTAACTATAACCTCT
>A01_2114572
TAGTTGACGGCCATCAGCTTGTGACTAAGA[A/G]ATATGAAACGTTCTCGTGTCTGGTCATTAA
>A01_2115461
TGGCCCGTCTTTCTCATTTCTAATATTGCT[G/T]CCCTAATTGCCAGTCGTGCAATGACAACTG
>A01_2116652
GGAGTGCCTCTCTTGGCAGAGCACTTAGAG[A/T]CATACATGCGACCCTCGGAGAAAAGGAGCA
>A01_2117342
TGTACAAAAATCACATTCCAGTGGTCTCAA[G/A]GGCAGTGACTTAAACACAAAAGCCAGTGAG
>A01_2118258
CTCTGCTGGTTTAACTCCTGATATAACCTG[C/T]ATAATAAGTTCGGATCAGGTACTGTGTTTT
>A01_2118365
GGTGATTTTCAGGAGCTCAATCCATGGAGA[G/A]AAGAACATACCCTGTCTTGAGGAATACCAA
>A01_2118749
TGTCCCAACTGCAACCCTCTTGTTGTTGAC[G/A]ATAGCAACGGCGCCAGACCCTGGTTCCTCA
>A01_2119009
GTATCATTCAAATTATGCCTGCGTAAGAAC[C/A]ATGAGATGTCACATCAGATGTTTATCATTC
>A01_2119795
AGTTTCACCCCCTGATCTATGCACTTCGAC[A/G]GTAAGAGTTCCATTCAGGTTTATAGATCCT
>A01_2120368
AGGAACCTCAACAGTTGAGTCACCATCAAG[C/T]AGAAGGCGAGCCTTTGAAGGCAAAACACTC
>A01_2120564
TATAATATCAGCCACCAACCACAAGGAGCA[G/A]TAAGTTTTGAAACTCCAACAAGAATAGTTA
>A01_2121050
CTGTCACCAAATCTGGAACAAAGAAACATA[C/T]TTAGTACTCATACCAAGAACGACAGCAATA
>A01_2121107
AATAATCTAAGACAGGAGATAGCAAAAGAA[G/A]CTAAAAACAGTACAAGATCACAACTACAGA
>A01_2123325
TGTATGTAAATTATATCACAAAAATTCAAA[C/T]CCATTTAGTTTTTAGTTCAGTTTTAATTTT
>A01_2123359
TTTAGTTTTTAGTTCAGTTTTAATTTTCCG[A/G]TTCTAAAAATATAAGATAAGTCGACAAAAA
>A01_2123543
ACTAGTCCACAAGCCAAACTTAACAGAGCC[A/T]CTCTATACACATCATCATATCATAATTAGG
>A01_2123805
TTCCGTCACGTTCTGACCCGTCATCTCTAG[G/A]TGGACCCCACCAGGGAAGCTTCCTTCTTGA
>A01_2123888
TCAACTCGGCCTGAGATAATAAAATCAATA[A/G]GTGCAAAGAACATACGAGCTGAAATGTTTT
>A01_2123958
AAAAGATTTATTTACCCTGATTGCATCGAA[A/G]GAACGAGTTTTAAGCCCACTTGGAGCCATG
>A01_2124591
TTCTCTTGTGAGCACTTGCTCATAAGGCAG[G/T]AGCAAACACTCGTGAGACGTCCAAAACTCA
>A01_2124723
ATTAGCCAATTCACGGTACCTGTTCCATCA[T/C]AACAACAACAAAAACAGCTTCTGACTTAAG
>A01_2124982
AGGAATCCTAGATTTCTCATCGAAAGCATC[T/A]CCGTTTATGTTATCTCCTCTGTAACTAGGC
>A01_2126178
GACGATGGGAGGGTAAGAGGAAAGCGTCTT[C/T]AGAACAGAGTCGAGATCCTTCTGATCCGGA
>A01_2128913
AGATTCGGAGATGCAACTGAAGTTGAGAGG[T/A]ATCTTGAGAGTGAAGAAAAAGCGAGATGCT
>A01_2129067
AGTCTCCCAAGGAAAAATCTGCTGTGAAGA[G/A]AAAAACGGTGAAGTCTAGTACTGAAACAGT
>A01_2129167
CAGTGTGATCAAAATTAAGGATCGTAAAAG[A/G]GTTCGTTCTCCTGTTAAGAAAAAGAAAGAA
>A01_2131451
AAACTTGCAGAGGTACGAGTTGCTTATTAC[T/G]TCAAGCAATGTCAATCATGTTTCCAAGTAG
>A01_2131811
GGTGGGGCGATCTGAGACGGAGAGAACGCC[G/A]TTTGGAGACGCAGCTAAAGAAGAAGGACAT
>A01_2131915
TTTCACTTGTAAAAACTGTCTCTATCTAAA[G/T]TATATGCATCTTCCTCTCCCACTGTATATA
>A01_2132994
AACACCAAACTAACAACAACAAAGCTCCTC[C/T]CTTTAATCCACCAAACCCTCACCAAACCCT
>A01_2133050
ACCCTTCTCCCAATCCACCACCATCCCCAC[G/A]AAACAAGACCGAGTCCGCGACCACGCCTAC
>A01_2133233
CCTCGGTTTCAAGCAGCACGAGCCTGGCGC[T/C]TTCCTCCTCAAGTTCCCTCACGTCTTCGAA
>A01_2133278
CCCTCACGTCTTCGAAGTCTACGAGCACCC[T/C]GTCCAGAGAATCCTCTACTGTAGGTTAACC
>A01_2133308
TGTCCAGAGAATCCTCTACTGTAGGTTAAC[C/T]CGCAAGGCTCTTGATCAGATCCGTGATGAG
>A01_2133653
AGGAATAGACGCAGAGGATGTTAGATTCTC[C/G]TTCCTCGTGAACTTCCCTCCAGGTTTCAAG
>A01_2133686
CCTCGTGAACTTCCCTCCAGGTTTCAAGAT[T/C]AGTAAGTACTTCCGCATCGCTGTCTGGAAA
>A01_2133896
GAGGATTGCTCATTTCAGGAACGTGATGTG[T/C]TTGCCTAAGAGGCTGAAGGAGTTTCTTCTC
>A01_2133980
TTCGACTCGTGGCAACTACGGGAAGCTTCA[T/C]ACTGTGTTTCTGAGAGAGGCGTATAAGAGA
>A01_2134031
GTATAAGAGAGGGGAGCTTGTGGAGCCGAA[T/C]GAGGTTTATTTGGCTAGGAGGAAGTTGGCT
>A01_2134372
CTAAGAATCCTCTTACCTGTCTACTTATGT[C/T]AAGTAAAAAAAATATTCTTTCTTTGTTTAT
>A01_2135451
CAGCTTAGGTGGTGGGATTCTGTTTTTTGG[A/C]GACGATCTTTATGATTCTTCAAGGGTCTCT
>A01_2136588
AACAGCCAAAACATTAACAAAACTAATGTA[A/G]AAGACCAAAAATATCTGATCACTCCAAGAC
>A01_2136852
TTGAACCCGGTTAAGTAGCTCAAAAACTTC[C/A]ACACTATCTCCGGCGAATTCACTTTGCTCA
>A01_2138260
GTTAAACTATAGAGTTGCGAGATTACAACG[G/A]ATAATAGGTAGAAAACCTTGGAACTTGCAT
>A01_2139771
GAGGACGTTCAGCCTCTGAATCAATACACA[G/A]AAATATTCACCATAACTTGATTTACATGGT
>A01_2140134
GAGTTGGTTAAGCGTGAACTCAATGATTGT[G/C]GGTTGGTTGAGAACGTCGATTGAACCACGC
>A01_2140593
GAGTCGTGAACAACAGCAGGAGGCAGTCGG[T/A]TTTGTTACTCGAAGAGAAGGGAGTGGTGGA
>A01_2140657
GCAGGGCGTAGTGGTTCACGTGATGAGTAC[A/G]CGTCTCAGTCTTCACAAAACAGAGGAAAAG
>A01_2140715
AAGACAGGAATTGCTCAAACTGTGGGAGAA[G/A]TGGCCATGATAAGAGTAATTGCTGGCAACT
>A01_2141160
CCTTTCAGATCGCATTGCTTTATATGACGT[T/C]TTATACGTACCAGACTTAAATTGTTCTTTG
>A01_2141303
CGAGGACGCTGATTGGAGCAGGTGAAGAAC[G/A]TGACGGGATATACTATTTTACGGATGTCAA
>A01_2141625
TGGAGCTTCTTATTTCTTAACAGTCTTAGA[T/C]GATTACTCGCGAACAGTATGGACGTTTTTA
>A01_2141993
TCACTCCAACTAGAGTACTAAATGGGAAGT[C/T]TCCCAGTGAGTTATTATTTGGCGCGGCTCC
>A01_2142138
CAGGAGGAGTTTGTTTGTTGGTTACCCGTA[C/T]GGAAAGAAGGGTTGGAAGCTGTATGATTTG
>A01_2142174
GAAGGGTTGGAAGCTGTATGATTTGGACAC[G/A]AACGAGTTCTTTGTGTCAAGAGATGTGACT
>A01_2142546
AGAACAGATTGAAGAGTTGGGAAGAGGACA[G/A]CGAGTGAAGATACCTTCTGTGAAGTTGGCT
>A01_2142582
GAAGATACCTTCTGTGAAGTTGGCTGACTA[C/T]GTTACTTACAAGACCGTTTGCGGCGAAAAT
>A01_2142738
CTCTGCAGAACACAAGGCGTTTCTTGCTTC[G/A]GTCTGTGGGGAGAGCGAGCCAAAGAATTTT
>A01_2142885
TGACTTGCCACCAGGGCGTGTGGCTTTGGG[G/A]ACTATGTGGGTGTTTAAAATCAAGTATAAT
>A01_2142918
TATGTGGGTGTTTAAAATCAAGTATAATGC[A/G]GATGGGACAGTGGAGAGACTTAAATCAAGG
>A01_2143086
AAACAATTGGGAAGTACATCAGATGGATGT[G/A]CACAATGCCTTCCTACATGGTGATCTCCGT
>A01_2143533
ATTGGATATAGTAAAAGAAACCGGGCTTCT[A/T]GGGTCCAAACCGGCTGATACACCAATGGAA
>A01_2143590
GGAACAGAATCATCAGTTGGCGTCTGATAA[G/A]AGTCCATTTGTCTCTGACCCAGCGAGATAT
>A01_2144019
CACGTGGTTGAGACAACTGCTTACAGACTT[G/A]GGATTCAAGCCAAGAACTCCAGCTCGTCTA
>A01_2144064
AACTCCAGCTCGTCTATTTTGTGACAGTAA[G/A]TCAGCTTTATATATTGCTTCAAATCCTGTT
>A01_2148341
GGATAATTCGGATTTTCGGATTTTTGGTGT[C/T]TTGTTCAGAAGTACCATTCGGGTTTTACTA
>A01_2153051
TGATGTCGCCGTCGAGTGTCGGAATCTCTG[T/C]TTCTCCGCCATTACAAGACCGGGGATCTCC
>A01_2153907
TTATGATAAATTAGAGTCTGGTTTTTGTTT[C/T]CAGAGACCGATTCAAACTCTCAGTGGTGGT
>A01_2154009
TTGCAAAGTGCTGTTGTTGGATGAGCTCAC[T/A]ACCTTCCTAGATGAGTCTGACCAGGTACGC
>A01_2154303
ACATCGGTTAGAGGAGCTGGAGTATGCGGA[T/C]GGAGCTGTGTATATGGAGAATGGGAGGGTG
>A01_2155303
CGGACTGGTGATAATAAATAATTTTGTTTC[T/C]AATTAACCAATTTTCTGTTAAGATGATTAT
>A01_2155587
ATAGAGATAGCATCCATGGACATGTCTAGG[A/G]GAAGCAACAGTTTTGACAATAAGAAAATCA
>A01_2155892
GATCCAAACATCACCAAGAAACCTTTCACT[G/C]AGGAAGAAGAAGAGAGACTTCTCAAAGCTC
>A01_2155948
AGCTCATCGGATCCAGGGGAACCGTTGGGC[C/T]TCTATAGCAAGGCTATTTCCAGGGAGGACC
>A01_2156296
GTTGAAAGAGTTGGTGGATGAACACAATAA[C/G]GCATTTCACACAGCTACACCAGATCAAAAC
>A01_2156591
TTTATACAATATATATATATAGGTGTCAAC[T/A]TATACATATAAGTATATACGTATATCACAT
>A01_2156650
ATGCATTTAAATTGGTACATACGCATACGT[G/C]TGTGTCCCTGTCGTTATTGTTGGTGTAATG
>A01_2156781
AGTCTTGTAAGTGTAATATATAATACGTAT[T/G]TGGGTACTAATTACCAAATAGCTGATGTAT
>A01_2156908
GATATTTTTAGTGCGTTAGTTACATTAGAC[C/G]GTCACTACATGCAATATTTGCATGGTGTTT
>A01_2157019
AAATCCAATTTCTTAATATATTAATTATTT[T/C]GGTTCGATCATCTAGTTTTTTCCGATTGTG
>A01_2157098
ATCTGCATGTATTCAGTAAGATATTATATA[C/T]ACTTGGTAATCTTTTAAATCTATAATCTTT
>A01_2157192
ATATATAAATCGTTTCCTATTTTTATTTCC[A/C]TTTTGTTAATTTCTGGTGTTAAGATGTTTA
>A01_2157739
ACTTTTTGTGGTTTATACATCATTGTTTTC[A/T]ATAAAATTCCTTAGCACCTTACACATAATA
>A01_2158591
TAGGAGCCTTCCTCGAGTCCACACTCACAA[C/G]GTTACTAATATAAATCCCGTTAACTCTCGG
>A01_2158751
GATGTTCGAAATGTAACCGCCTCTTCCTAC[G/A]TCTGTTTTGATACGGAGCCCAGCTGCTGAA
>A01_2158804
CTGCTGAATCCCAAACGTGAATGTCTTGGA[C/T]GGTAATGTTGAAAATCCCACCAGACATCTC
>A01_2158928
TGAACTAGGACGTGCCATGGCCATTCCGTA[C/T]TGGTCCCACCCGCTCTTCACAGCTACAAGG
>A01_2159025
ACATTGGTGCTTGAATCTGTAATGTTTATT[C/G]AGAGAAATAAGACACAAGACAAGATTGTAT
>A01_2159225
ATTCAAATGATGTAAAAATGCAAGCAAAAA[T/C]AGTTGGAAGTATAAGTAAGAACCTGCAGTA
>A01_2159433
ATCAATTGTACCATTTTCACCTGTAGTTTT[A/T]AAAAAAATTATATTAAATCTAGATGTCATT
>A01_2160062
ATTCCTCTGGGTCCTATCAAACCATGATCC[C/A]AGACAAATATATCGAAATTGTAACCGTGAT
>A01_2160126
TTCATGTAAACTTAAAAAATAATAAAGCAA[G/A]GAAAGAAATAAAAAAATTAGTACAGCTGAC
>A01_2160654
TTCACGAGTGACCGTGATTAGCGTAATCTA[G/C]CGAAAGTGTTTACCAACCAAACCAAACTTA
>A01_2160912
GTTAAAGCTTCCCGAGAGCCACGTGCCCTT[G/A]GGTACATTAAGCTGGGCCCCACCCTCTCCC
>A01_2162499
TCGGAGGAGTTTCAAATCGAGAAATACAGC[T/A]GAGATCGAGCTTAGGGGGTTTCTCTTGAAA
>A01_2162530
GAGATCGAGCTTAGGGGGTTTCTCTTGAAA[C/T]TAAAAGTCAACGGGTGAATACGCGTCGAGG
>A01_2163130
CCTTGGGAATGCCAATCTATCTGGTCAGCT[C/T]GTAACGCAGCTTGGCCAGCTCCCAAACTTG
>A01_2165617
TTGTAACACTAATGCTTTTATCTGTCCTTG[G/C]TTTTCTACTTCTTATTCTGTATTTATTAAG
>A01_2166143
AATACAAAAATCATTAATGCATTTTGGCAT[A/G]TATGCTTAGTTAAGACTGCGACAATTTTGA
>A01_2166329
TGAGTTGAATAAGGTTTGGTCCGAGAAGAG[G/C]ACTCCTGATTTCCTCTGAAGCGCATTGAAG
>A01_2166684
AATATTTTATAAAATAGTAAAATCTTATAT[T/C]ATAGATTTTATTTTTATTTTCCAGCCACCA
>A01_2167157
GAAAAGGTGAAGGAAGATTTCTTGTATCTT[C/G]TATCTTTGATCTTTTACCATCAAATCTTCC
>A01_2167710
CTCATCATGTAGTAACCCATACTTAACCCC[C/T]TCACGTTATAAGGAAGCCCAATAATTGCAT
>A01_2168882
ATTTTCACTTTTAATAACCTCAGTGCTTTC[A/T]ACGCGGATTGTCTAGTGCTACTGCTACATT
>A01_2169270
AACTTAAATGTTTATTTTACTTCCTTGAAT[A/T]TTTTTGCTGCATGTAAGGTATACAAATGCA
>A01_2169363
CTAGAGAATACAAGAACACCTGATCTGACT[G/T]ATATGGTTCCTAACGTCTTTGTGTTTTTGT
>A01_2169410
CTTTGTGTTTTTGTTTTTATGTTTCTGAGC[T/A]ATCTTTGGTTGATATAATAAACTCAGATCT
>A01_2169505
TGCTGATCCTTCCCACAGCTCCGCAAGATC[C/A]TTTCTCCGCCATGACATGAAGATCACTGGT
>A01_2169594
AAAGAGAAATCACAATCACATTATATTTCA[C/A]ACTGATCGGGGCTCATGAATATAAAAAAAC
>A01_2169728
CAAGACACCTGCAGCTAGAGCCGAGACCAA[G/A]CCAATGGCGTACCCGGGAAGTGCATACCAT
>A01_2170170
CACAGTCACCATAACATTAGCACCAAAGAA[T/C]CTCTCAGAGAAGAAGACCCAGAAGATGTCA
>A01_2170698
AGATGCAAATGTGACGGTTACAGCTGTGAG[C/A]ATGAGAGCGGATGGAGCAGGTTCTAGCAGA
>A01_2170937
ATGCGCGGTGTTTGATTCTTTGTAAACTAC[G/A]CGTGGTTTTCCAGTTTTCTAAGAGGGATGT
>A01_2171056
TTTGAACATTAGTTATCTATCATTTCTTTC[C/T]GAGGCTATACTTACATCATTCATCATGCAA
>A01_2171110
CATGCAAATTGTCCATTATAGTATCTAGTG[T/A]CTGACCCAAAAATCAAGTATCTAATGTAAT
>A01_2171217
AAATTCAGATAACTAATTGACTATAAAACT[A/G]TGCATTGTTTATAACTAAAATGGAATACAT
>A01_2172390
CTCACCTGAGAGACCTTAAACGCGTTGTTG[A/G]ATCCCTTAAAAAGGCTTCAATGGAGTGAAT
>A01_2172548
TGTCACAACGTATTATGATTAATTTTGTCC[A/C]AAAAGAAAACGTATTATGATTAATTAGCTA
>A01_2173291
AGAAGATCTCGAGATCTGCACATCAGACGA[G/A]GAAGAATACGAAGAGTACGAAGAACGAAGA
>A01_2173549
CCGTTACATCAACGGCAACACTCCCAAAGC[G/C]AAATGGATCACTGCTGAGAAGTTCGCCGCT
>A01_2173606
CGCTTACTCCTTCGTGAAAACCTCTCAAGT[A/G]AACGAGGATGAAGAAGACGACGACGAGAAT
>A01_2173831
TTACGTAAACAGCTATAACAACTGCTTGTT[T/C]GAGAACAATCACGGCGTTGAGTTGAACGAC
>A01_2174014
GTTGAGAGATAGTCAGGATTTGACTGAAGC[T/C]TTTGAGGAAGCTACGAGTGAAGGGATACAT
>A01_2174218
GCCTAGGAAGGCTCTTTTAATGAGAGCTGA[A/G]ACTAACATGCTGCTCATGAGTCCCATGAGT
>A01_2174548
AGGGACTAACTTCCAGTGCTTTGCAACGAC[C/T]GGTGATGGATCTATTGTGGTTGGCTCTCTT
>A01_2174956
GATATTCTTGCTCCAGACAAACCGCATCAT[T/C]CTCTGTATGTTTTGTTCATAGTAGAGTGCA
>A01_2175010
GAGTGCATATAGTCTTTTAAAATCCTTAAC[A/G]TGAACCTTTGCCTGTGCAATAAAAGTTGTC
>A01_2175142
TTTTGGTAATCGATCTTAAGTGTATCGTTT[G/C]TGGTAAATTTTGATATGTATAGGTCACTGA
>A01_2175206
TGGGAAACAAGAGCGTCACGTGGTGGCAAC[T/C]GTTGGCAAATTCAGTGTGATATGGAACTTT
>A01_2175440
GAAAGTCAGCTCTTTCAGCTTATCCAGCAA[A/G]CGATGAAACAAGCAAGTGATGGACCTTAAG
>A01_2175605
TAATCTACTTTGGTGTGACATTGACTCTTA[G/T]GTTGGTTATATTATCTGTTTTCATTTGAAA
>A01_2176228
AGCACGCTTGCTAAGCTCATAGTACTCATC[C/T]AGCGTCAGCGTCACACTCCTCGGAGAATCA
>A01_2177010
CCGCTCCGATCTTATGCTCTTCAGCTTCCA[A/G]ATGAGAAGAGTGTGCACACTCCAACGACTC
>A01_2178516
ACCTGACTGTGGTCACAACTCATTGTCAGA[A/G]CCAGGAGACAAAAATTTGGTCGACACAACA
>A01_2178555
CAAAAATTTGGTCGACACAACAAAAAAAGA[T/C]GTCATGTCCATAGATAGCTTTTTCATTCCT
>A01_2178711
ACCAGTTTCTCTTTCCTTGCGAGGCAGTGA[C/G]CCTGGTTTGTTCAACTCTTTCTCTTCTGAT
>A01_2178825
ATACAGGGGGTATTACAACATGCGTTCAAA[A/T]ATATATAAGCAAAAGCAAGGATACAGCAAA
>A01_2179168
GTATACAACTGGCCAAAGATGTTAGCATCT[T/C]GGTCCGGTACTTCAACTTTCAAGACTGAAG
>A01_2179626
AAGCAAGCTTGGCAACAATCAGCTGCACTC[T/C]CTTTGTGATGTGTAAGTCCCCATCTCACTG
>A01_2179979
TAAGTGAGAGTTCAACTCTAGTTATATTAA[C/A]CAATGATCCAGTCTTAAATGAGTAATACCT
>A01_2180238
TGTTGTTAGTTACTTGAGCTTCTATATTCC[T/C]GAATGATATTATCTTTACTAAATTGACCTT
>A01_2180597
AAGATCTCATCAACTAGTTTGCCTTTTACA[T/C]TAGGAGAGAGTTCAACACTTGATTCTGAAG
>A01_2180805
CTCCATTTTCCTAATCTCATCTGACGTGTA[A/C]CTAACAGCTGGATAAGAAAATTGAAAAAGG
>A01_2180955
AGCATAGAGAAAGCGAAGAACAAAGAGAGC[G/A]ATGAGAATGTTGAAAGAGCAAACGAGTAGT
>A01_2181494
AATAAAGCCCAAATAAAGCCCATAAAATGA[T/G]AGATGGGCCGAAACTCTGAGCCTTTTTAAC
>A01_2181761
CCGTCTCCGTTCGCCTCAGTCTCGCAATCC[C/T]CCAAGCCTTCCTCTGGAGCCTCTACGACTA
>A01_2181907
CTCGGATCCTACCGGAGACAAGTCTATCGG[G/T]TTGCTCTGTTTCCGTCAAGAGGATGCTGAA
>A01_2182023
TTGAAAGTTTCTGACTTTATGAGCTCTTGA[C/T]TCTCAATTATCATCCCTGCAGGCGCGTCTA
>A01_2182793
GCTTTTGTATTCATGGATCCTTCACTTAAT[A/T]AGTTATACTATCTTAATTGGCGAAATGTTT
>A01_2183774
TCCATCTTTCTTTAGCTTAAACCGGCAAAA[T/A]TTTATCCAAAGAGGTTGTGGTCACCTAAAC
>A01_2183878
AAAATCTCTTGGACATCTCAGCTTAAAAAT[T/G]ATGATAATCTTTGATTAGTGATGATAATCT
>A01_2184669
ACTTAGTATTGTAACAAAACTTATTCAACA[T/G]TTTCCTCAGTAATTACAAGAATTTATGAAT
>A01_2184989
ACATCTTTGTTATATTAGTATTAATAATCT[C/A]TCAGGCTTGTTTTTGAGTAAAGAAAATCCT
>A01_2186618
AGTACCTTAGTGGTTGTGTTTTAGGTATGT[C/T]TTTTTGCTAACCACCGAAGTTGATTGTCTT
>A01_2187281
AGGTATAGACAAAGTGTATGACCTAACGAA[A/G]ATACAAGCAGAGACAAGGCGACCAAAACGT
>A01_2187443
CCTTCTCCACGATGACTCCATCTCCATTGC[C/A]AAACTCCGAGCTCTCGCAGCCGCGGGATGG
>A01_2187593
GTTGACGGATTACGACAAAGTGGTCTTCAT[C/T]GATGCTGACATCATTGTCCTACGTAACCTT
>A01_2187686
CACTGGAAATGATGTGTGGATATTTAACTC[C/T]GGTGTAATGGTCATTGAGCCTTCTAATTGT
>A01_2187990
AGTGTAAACACTAACAAATGGTTGTTACAC[G/T]CAACTATAACACACTATATTGATGTGAGCC
>A01_2188094
AATAAATCATACGTTATACTAAAAAACACC[A/G]ATAATGCTATGCACATGTATGCATTTGAAC
>A01_2188153
ACAAAAATTGATGATGTTACATATGTATTT[A/T]TCAGGTATCTAAACGAGATATTCGTGTGGT
>A01_2188302
CGCCGAGCCGCCTCAGCTCTACGCGGTCCA[C/T]TACTTAGGCTTGAAACCATGGCTTTGTTAC
>A01_2188452
TATGGACGAAGATTTGCAGAAGTTTTGTAG[G/A]CTCACGGAGCAGAGGAGGACAGAGATCAAC
>A01_2190386
ACTTCTGTGGAAAATATGAATCTCTCTTAC[C/A]TTTTCTTAAATTAAATGCTTTAGAAAAACT
>A01_2190446
TCGATTAATAATCTATTTCGTGTAAATTTC[C/T]TTCACTGTTAGATTTTATTTCTTATTATAA
>A01_2190560
AGGTTAAAGGTTAACAAGATACAAATTTAG[G/A]TTTTCTATCGTAGTTCTTTCAGTTTTATTA
>A01_2191128
AATTCAAAAAGACAAGTTAGCAAAAAATTA[A/G]TTCAAAAAGACACAAACAAAATCATATCCC
>A01_2191306
CGAATCTGCCAGGAAATTTCAGTTGGAGTT[A/G]GATCCTCCCATATATATATATAACATCGAC
>A01_2196423
TTAATCTTTGTATTAGATCTCGATTAAAAG[G/T]GTTATATATAAATTCTGCAGTTTAAAAACC
>A01_2199223
GTTGCTTAGCTCACACGGGTTTACACAGAA[C/T]CAGCTTACGTTGTGGAAGTACCCATCTATG
>A01_2200105
AATTAAAAATATTAAATTTACCAAACAACC[G/C]TTAAACGTTTCTATAATCCTAATTTAACCC
>A01_2200139
AACGTTTCTATAATCCTAATTTAACCCGAA[C/G]AACTATGAAATTGTTCAGTTATAGCCCAGT
>A01_2200624
ATCGTGGCTCGAATCTTGCTCAAGGTATAG[C/T]AGACTGACTCTACCTTGTGATTTGTGGCTT
>A01_2201982
CTCTTTGAATATGAGAACGGGCAGATTAAT[G/T]CATATTTGAGGTGTTCTTGTCCTATCTCTC
>A01_2203212
GCATCTAAGGTAAATTCATTACCCTCTCTC[G/T]CTCTCTCTCATCTTCCTTTTTTTCAGACAA
>A01_2203270
CAAGCTTGGCTTAAAGTTTCCTCTTTTAGG[A/G]ACTCAAAAGGTTGAGACTTTATGCGTTTAA
>A01_2203556
CAACCGAAGACATCACTGCCGCCTCTGTGG[C/T]CGTGTCTTCTGCGCCAAATGCGCTGCCAAT
>A01_2203595
CTGCGCCAAATGCGCTGCCAATTCTATCCC[T/C]TCTCCATCTGATGAAGCCAAGGATAGTCAT
>A01_2203953
TTAGCTTTTCTTGTGTTATGTGTGTTTATG[T/G]TTTACCTTTGTAGCTTCTGTTATGAATGTA
>A01_2204246
GCAAGCAGATGGGTGGAATGATGAGAAGGA[G/A]GGAAGCCCTACTTGTGAAGAGGCCTTTGAG
>A01_2204531
GGCTTTGGTAGCACAGCTTTTGGAGGTTGA[C/T]AATCTACCTATGGTTGACGAAGGCGATAGA
>A01_2205161
GGAGAAGTCTGTCTCGCGGTTTGCGCAGGA[G/A]TATCTTCTTGCCAAGGACATATCTCTTGTT
>A01_2205407
TTTTGATGGTTGCCCCAAGCCTTTGGGCTG[C/T]ACGGTAAGTTCCACAATATTCTTAGGTGTT
>A01_2205835
CTTCTAGTAAGACTCATTTCCAAGGGAAAT[T/C]GGATGGGAACGACAGGACTGAGCCTTCTAA
>A01_2206157
CCATCAAAGCATATTGGTTTCGGCATCAAC[G/A]AGATGTGTGTGGAAGGGATCTGTGTGTGAA
>A01_2207032
TATATTTTTGATTGTCTCATATAATCTTTC[C/T]TTACTGCAGTTTTGGGAAAATGGTGGCTTG
>A01_2207100
TATGCTTCAATCAATATATTTGCAGTTTCT[T/C]TGCCACCAGCAAAACTTGAGTTCAACTGTG
>A01_2208074
TTTCTGATATTAGCGGGAAAGGTGTCATTC[C/T]TGAAGATGTAGGCTCAGACAAACCCTCTGA
>A01_2208720
GTTGAACTCTTTGAGCGATTTGTCAGTTGA[C/T]ATGAGTAGAAGCCTAAGCTCTGCTGATGAA
>A01_2208906
TGAGGCTCTGAGGAAGATTTGCTGTCCCTC[G/C]GAAACTGATTTCATCAGATCTCTTGGTCGG
>A01_2209153
TTGGGAATCTATCAGGTAACACAACATAAA[C/T]CGATTTATTTTATTACCTATTTTGTTGACA
>A01_2209194
TATTACCTATTTTGTTGACATATAATAATT[G/A]AACCAATGATTCTTTGCTAAAATCTGTAAA
>A01_2209273
TAAAGGAGGGAAAGAGTTCAAAATGGATGT[C/G]TTGGTGATGGAGAATCTTCTGTTCAAGCGT
>A01_2210368
GACACCCAAGCCAGCAGTAAACGTTACTCC[A/C]GTAGAAGGCAGCCAAAGGTTTCCTTCAATG
>A01_2210741
GGATATGAACAAAAAAAGGTTCAATATAAT[C/A]GAGAATCATTATATTACATAGTTTCTTGGG
>A01_2210789
ATAGTTTCTTGGGTGACAAGAAACCAAACC[G/C]TAATTAAAGAGTTTCAAGAAGTGTTTGTTT
>A01_2210835
AAGAAGTGTTTGTTTACCTGAGGGTTGGTC[A/C]GCTTCTTTCCTGCCTTGTGCAGTGATGGTA
>A01_2211069
CACAGATAGGTCAGAGTCAGACCTAAGGGC[T/A]ACGGCTTGATGCTTCTCTGGTCCAGCTGTG
>A01_2214421
TTATGTCATATAGAAAAAAATACATGAATT[C/T]AAAAAGTGAGTTAATTAATTTTCGTATAAA
>A01_2215649
AAATCAGAGATTCAATTCTACTTTTTTTTT[C/T]CTCTTAATTCGTTCTGAACTTTCCAAATTT
>A01_2216041
TACTATGGAGGAAGCTGATCACGATTCGTA[C/T]CACAAACGTGCTAAAGTGTACTCTGGCCTT
>A01_2217914
GACAGTTCTCAAGCTTCATAGCTGTGAGGG[G/T]ATAACATCCGCGTCTATGACATGGATTGCT
>A01_2219770
ACTTGACCCATTTGAGCTTGAACGGCTGTG[C/T]TAACATGCATGACCTTGATTGGGGTTCAAC
>A01_2220891
TGGGACATTAAGTTTCCTTGTCGGAAAAAA[G/A]CAACTAACAAACAAATCTCGGTTGATCATT
>A01_2220945
GATCATTTATTATCTTTCATGATTTTCTAA[C/T]GGAAATCAAAGAAAATGTAGCAACACAAGT
>A01_2222544
TACTCTTGAAAAACTTGCTTATTCGGTATC[C/T]AATTGTACTAGAAACATCCTCGTAATCCAA
>A01_2222635
TTTTGACTGGATAATCAACCTTGTATATTT[C/A]ACCGGTCCATTCGTAGATTGTTCCTGACTG
>A01_2224105
TATCAGCTGTGCGCTTCCGGGAATGTAATT[A/C]TTTTCCTGCTCTTTTACGTCTCATAAGATA
>A01_2224221
TCAGTAACCTATGCCGATTACTAATGTTTA[A/G]ATGTTTTTTTCATTGTATAGGACGCTGATA
>A01_2224850
CTCGAAGACTGTTTACGCCCGTCTGTTTGA[T/C]TGGTTTGCTTTTACTTGCTTCATCCCTTCA
>A01_2225111
TTTTTTCCTTTCCCAGCCTTATCCATTGCT[A/G]GTTTTATTGACGCACCATGTAAACTTTATC
>A01_2225167
TTATCTGGGCTGGTGCATTTCTGTCGACTT[A/G]GTATATTTTTAACCTAATCAACGGCTAAAG
>A01_2225368
ACATTGCTTCCTGTCCTTATAATCTCTGCT[T/C]TGTTTTCAGCATGTATTCAAGATGGAGCAG
>A01_2225566
GCCCCTTAACCTGTTGTGATCTGTGAAACA[A/G]CATCTTCAATAAGTTTTTTTGTTACCTTCA
>A01_2225617
GTTACCTTCAGTGAGTGATTTTGGTTATGA[C/T]ACATATTTCAAATTCTCATGTCTTTCTATT
>A01_2225827
TAAGAAAACGAACGGATTACTGATGTCACA[A/T]TGTACTGTCGCATATCTTTTAGCCTTGTTA
>A01_2225864
GTCGCATATCTTTTAGCCTTGTTAATGTGT[C/A]AATACATTCACCACACGTCTAAATTCTACC
>A01_2225930
GCCATTATTGTTCTCATTATAGAATGTGGA[C/T]GATAAAAGTTGTAGACTAGCTGCAAGAATA
>A01_2226072
ATATGTTTCTTTTCAAACTACTGTTGTAGT[T/C]GCCAGCCTCTAAAATTGTGTCCCCTTTTGT
>A01_2226444
ACTCTCTCTCATTATGCTGGCAAGGCAAGT[G/C]GTGTCTAGAACAAAGCTTAATGTTATTTTG
>A01_2226746
TTTTTCACTTTGCAAGATACTCTGTTATGA[A/T]AGTTGTGTATATCAAGAACTATCAATCGTG
>A01_2226857
AGCTCTCATGGAAACTCTCAACGAAACGGA[T/G]CCTCACTATGTTCGTTGTGTGAAGCCAAAT
>A01_2227005
TTTCACATTTTCCTTGGCAGTTATGGTCTA[C/A]TTTTAAAGAGAGAATCTTTAGCATTTTTTT
>A01_2227052
TTTAGCATTTTTTTCTAGCTAGTTTGGTGT[C/T]TCCATGGTTCACTTCTTTAACGTGAATGAA
>A01_2227149
TGTCGCAGAATGCATATACTTTGCCGTGCT[T/A]TGATAGGCTAGAAATTTATATTCGTGCTCT
>A01_2227335
TCCATGTTTTGTTACAGTTGCTTTCTAAAA[T/C]TGTTATAATTGAAAAATTGTGATCTGACTA
>A01_2227584
GCTAGCTCCAGAGTTCATACATGAGAGGTA[C/G]GCATATTTGATGGATGATTCTAAGATCATT
>A01_2227687
CCTGTGTAAAAAATATTATACATTCTGTGA[A/C]CTCCTGGTTGAGGAAAGATAATGTGTCGAT
>A01_2228233
CGCGCGGGCCTCTGCAATTTCTATTCAAGC[A/G]TACTGTAGAGGTTCCTTTCTCATCCACTAC
>A01_2228444
GGTTACTAGTATATTATTAGTTTGTACATG[C/T]TTTTTTATTTTTCTTATCTCTGTTTCATTT
>A01_2229514
CGCTGAAGGTAACTTTCCACTGTTATCCAT[A/G]TGAAGCATATAAAGAGCTTGTTCTGTCATT
>A01_2229666
AGTCCTTAAGTTTTTTCCCTTGGGTCAACT[G/T]CAATTATGTTTTAATTAACCTACATGGCGG
>A01_2229734
TTTAAAGTTCTTCTATAGTGTTACTATATA[C/T]ACATTTTATTTCTGGTTGTAGAGCAATTCG
>A01_2229769
TTTATTTCTGGTTGTAGAGCAATTCGTTAT[G/T]GATATATAACTGGATCCCGTCTCGGGAGAA
>A01_2229942
TTTCTTTGTTCACTGCTTGTTTTTTCTGTT[C/A]TTTGATAAATATTGGTATCTTTTTGGTATG
>A01_2229992
TTTTTGGTATGCTTTCACTTTTTGCTTAGA[G/A]CCCAAATTCTTTCGTTTTGGTTGTTCACGG
>A01_2230130
TTCTGAGTGCTAAAACCGATTTCAATAACA[A/C]ACTACAGAAGTTGAAAGAAGCTGAAAAAAG
>A01_2230231
GCTGGTCTTTTTCTCAAGTCAACCTCAGGT[G/T]TGTGTTTAACAAGTGTATTTACTTTTTCTT
>A01_2230543
CTGTTTTCTTTGGTCTATACTTTTTACCAA[T/C]TCATTATTACCGTCTCCTCAACAGAAACAC
>A01_2230829
CACTGCTGAAAGAAACTTGGTACGCATTCA[C/T]TGCCTTTTTCATTAGGCTGACAATTTATTT
>A01_2230898
TGTAGTTGTTTTCCTGAGTTGATAGTAACA[G/T]GTTTGTATTATCACATATTCTGAATCTTCT
>A01_2231037
TGCTCTCCAGATGTATAAAGGAAAATTTGG[A/G]ATTCAATGATGATAAGCCACTGGCTGCTTG
>A01_2231186
GCCCTCAAGGTGACAACTTTCTTCCAAATT[T/C]CTTAGCTTAGAAAAATTGATAGAACTCTTT
>A01_2231499
GTTTCTTGAGATTCAGAAGCACCGTGTTAC[A/C]TTGTTATAATATGTTCATTGTGTAAACTGA
>A01_2231674
GACAGCATGTGTGGAAAAGATTTATGGTCT[A/G]ATTCGTGATAATTTGAAGAAAGAATTATCA
>A01_2231719
GAAGAAAGAATTATCACCGCTTCTTGGATT[G/A]TGCATTCAGGTGAGAGTCCAAAAGTAGGTA
>A01_2231860
CCATTAACTTAATTCTTTAACATGCATCAA[T/G]ATACCTTGTTAGTAAGACTTTATACCCCAT
>A01_2231917
CCATTTGGCATTTCTCATGTATTCTTCATT[T/G]TATCTGTGGTTTTTGGTATACAACTTGATA
>A01_2232128
ATCTCTTTAGTTTCAAAATACAAAAAAATT[G/A]TTGGAATATGTTATAACTTTTCAAGCGTTT
>A01_2232473
TACGTTGTTAGTTTCTTGTGCGAGGATTAG[C/G]AATAAGAATGCTCATGTCCCAAGATGCCTT
>A01_2232527
ATGCCTTGTACTTTAAGAATATCGATGTTT[T/A]TTTTCTAACCTGGATATTTTATTGGTAGGT
>A01_2232847
GTACACCATGCTTTATACTCGTTATGATTT[T/C]TTATAGACGGATGCTTTCTGTGATCTAAAG
>A01_2232980
TAAAAACTCATTCCTTCTTTTCTGATAAAA[G/A]GTCTAGTTTCATTTGTAGTTGAGCTTGCAT
>A01_2233085
TATACACCAGAAGCGAAAAAAATCACTGGA[C/A]GAAATCAGGCAGGACCTATGCCCGGTACGT
>A01_2233129
ACCTATGCCCGGTACGTCATTTTTGTTTGG[T/C]TTCCGTTTTCTCATCTTTGAATCCTGGCCG
>A01_2233363
TGAAATGTTTATTTAAACACTTTTACCCAA[T/C]GCCTGCATCTTTGTCTTGTAGGTGGTTTCT
>A01_2234100
TACGTCGTTGAAAGCATAATATTTGTAGTT[G/A]TGCAATTGTCAATCAGCTCACTTTTTTTTT
>A01_2234270
TTTTATTTGAGAGCTACGTGCCAGCAACTA[C/T]GTTGATGATATCAATGCGATCATTCCCGTC
>A01_2234483
ATTAATATATTTGTAAAACTTCTAATTATA[T/C]TAAATTTTTACTATATTAAACAAGCTTAAT
>A01_2237498
TCCGCTGTTGAAACTCTGTTTGCATTCTGG[G/A]TATGTGTGGGCTTCAGAGGCGGTTCATGGG
>A01_2238203
TATCTCCGGGTTTGCTCAAAGTGGCCTAGA[C/A]GTGGAAGCAGTGCGTCTGTTTATGAAGCTG
>A01_2238470
GAGGAACAGTTTCGACCTCGTCGCTTGTAA[C/T]GCCATGATGTCTGGCTATACCCAAAGTAAT
>A01_2238518
TACCCAAAGTAATGACGGCCACAAGACTCT[A/G]AAGCTTTTCGCTTTGATGCATCATCAGGGA
>A01_2239724
CAAACAAGAAGGGTATGTTCCTGAGACAGA[T/C]TTCACACTTGTAGATGTGGAAGAAGAGGAG
>A01_2239770
GTGGAAGAAGAGGAGAAAGAACGCGCGTTG[A/C]ACCACCACAGCGAGAAGCTAGCCGTTGCGT
>A01_2240153
GAACGAGAGAGCAGAAACGAACTCCACAGC[T/G]TCTCCATCCTTGAAGCATTTTGGCAACTCA
>A01_2240747
CACTAAGTTCAACTCTTTACTCCATGAACC[A/G]GAATCTGATTCGTAGAACCTGAAACAGAGG
>A01_2240783
TGATTCGTAGAACCTGAAACAGAGGTTTGG[A/G]GCTTCTCCAGAGATTGTAACAAGCTTGTAG
>A01_2249069
TTTCAAGTGTCATTATCTTTTTTTTGCTGA[A/C]GTGATTAAATATGTTGTAGACGGTTGAAGG
>A01_2251365
TCTTTATACTGTTTCTCTATAGCTTGGAGA[T/C]TAAGCTGAAGAAGATGGAGAGGAACTCTGT
>A01_2251421
TCTGTAGATACATGTATTATTATGTTGTAT[A/G]TGATGAATGTATGTACAAAAGAACTTGTGT
>A01_2252411
TTTCTCGTTCTGCAATTTATCGTGTACTAG[A/G]GCATTCTATGATACTGCATTAATCCTTCTT
>A01_2252850
ATCCAATGGAACCGAATTTAAATGAAACTA[T/C]CCTATTTAAACCGAATTTTCATTTTTATAT
>A01_2252887
TAAACCGAATTTTCATTTTTATATATAAAA[C/A]AAATTGGTTTATTTTGGGTTTTGAAATTTT
>A01_2253989
TTCAGATTAATTTTACAATAATATTGATTG[G/A]TTGATTTGGTTCATGTCATCTCCGTGTTTA
>A01_2254467
AGGAACTTTGTAGACTGTAGATATATGTGT[G/T]TACAAAAGAACTTGTGCCCACCAATCTCAG
>A01_2254526
AGTAGATGTACGTATAGTAAGTGATCATAA[A/T]TATGTGTATACAAATTTTAAATAGTAAATA
>A01_2254637
CTTTCCAAGACAAGAATCTTGCCCTTTACC[T/A]ATCCACTTTCACTTCGTATTGACTGAAAAA
>A01_2255953
GTTATTTCCAAGTGTCATTGAACACCTCCA[A/G]GTAGCTTTCCAAGACCAGACTCTTGCCCTT
>A01_2256484
ATTTTAAATAAAATGAGTTATTATATTTCT[A/T]TTTCTTCTCTCTTCTATAATTTATTAGGCT
>A01_2256587
CAAGCATTTTATTAGTCTTCCAACAAATTT[G/T]AGATTAGTTTTACAATAGTTTTGAGATGGC
>A01_2256827
TACATTATCTTACATATGTGCAGTACAGAT[A/C]GTGAAAAAAATTTAGTGATACCAAACTAAT
>A01_2257077
TGAGAGAATCTGCTGCTCCACTTCTTCCCA[A/G]TTACGAACTCTAGTCACCAGAGGATGTCTG
>A01_2257125
CAGAGGATGTCTGTCCACAGACTCAGTTTT[G/A]GACCAAGGGTATGAGTTTTCATAGTCAAAG
>A01_2257243
ATCAATATCTCTGCTCCAAATGATCTGCAA[T/G]TTCCAATTCTTGGATTATTAATTAGCCCAT
>A01_2260093
CAAATCCGAAGCCCTCCGTGAAGATCAGAC[G/C]TTAGCTTCCTCTTCTTCTTCTTCTCCCAGC
>A01_2260575
CAAATGTGAGCTTGAACAAGATGTAAGTCT[T/G]TCAGATCCCATTACTTGTCCTTGTCCTAGT
>A01_2260713
TACATAGTTACATGAACTTTAAAAAACATT[A/T]AAAAAAAAGTTTGATATTTTTTTGTCTTCA
>A01_2260770
TTCATCCTTAATTGCGTGTTTGGGATGATA[T/C]AGATTAAGAAGCTGCAGCAGCAGTTACAAG
>A01_2260859
GAGTGCTGTTGAGCACTCTAGTTCTCCCTT[T/C]ATGGAATCACCTTGTCAACTTCCTGATAAG
>A01_2261497
TCCAGACTCAACAAACTGGTCCCTGAGCAT[T/C]GCTACATCGAAATCTTTGAAAGAATACACA
>A01_2261740
TTGCTGTCATTTTTGACTTGGACAACGAGT[G/A]ATGAGAATCTTCATCAGATCACAAGTAAAG
>A01_2267290
TTGTATATAGACGCAATTGATTGGTCTATT[G/A]AAGAGAATAAATATTGTTTCTTACCATGTA
>A01_2267881
GGTTTCTCTCTGAACTTGGATCCCTCAAGA[A/G]ATGAAGAGCACAGAGCCCGTTAGGGTTGCC
>A01_2268194
TCTTGTGGAAGATCTCTTCAAAGGGTACAA[C/T]GCAACAGTTCTTGCTTACGGCCAGGTTTGA
>A01_2268665
AAGGCGTTACTGAGGTAGAAGTGAAGACTA[A/G]AGAGGAGATGAGCTCGTATCTAGCACGAGG
>A01_2269948
GCTTCAAATCCCATCTACTTCTCAACCAGA[C/T]GATGTTTCTTCCTCGTCACCTTCAGAGTTT
>A01_2270939
AAAATGAATCTGTGTCAGGTACCTTACCAA[T/C]CTCAAACTTGAGTGAACTTGAAAGAAGTTG
>A01_2271613
TCTTCAAAACATCATCTATTATGAAACGGA[G/T]GGAGTATTATGTTACATTTATCTGAAGTGA
>A01_2272086
CCTTTTATTGCATGTTGGTTGAGAAAAGTA[T/G]AATAAAACTGTGGTTATTGATTAGTTGAGA
>A01_2272551
CCATTTATCTTGAATAAAATAAAATGTTTA[T/C]TCCATCGATTCCAAAAAGAATTAAACAAAA
>A01_2273715
CGTAGTTATATGATAGTTTTGTTGATGATA[G/A]AAAAATCTACAACTCAGTTTTATCTTGTTA
>A01_2274139
TGGAAGAAACATGAAATACAGCTCTTGTTA[T/C]TTCTCAAACGATTCAAGTAGCTTAGAAGAT
>A01_2274657
ATTATGTTATATTTATCTAAGTTGATTGTT[T/A]TTAGCATATGAAAAACTATGGAGAGCTTCT
>A01_2275071
TACAATTGTGGATCATTGGCTACTGAATGG[A/G]AATCATTATGCAAAGACCAGGTAAAAACTC
>A01_2275216
ATGGACAAGGAGATAGTTGCAATAAAGGAG[G/A]TAATGGAAATGACTTATGGGAAAGAGGAGG
>A01_2275255
ATGACTTATGGGAAAGAGGAGGCAGTGAAG[G/T]GGATGGTTTACTGGAGAACCTTCTTCATAG
>A01_2275362
TTCTCACTTCCTCTTCAAGAAGAAGTGATT[C/A]TATATCTTTCTTCTCTTAATAATCAGTTCT
>A01_2275669
GATTCTCCTGTTTGACACAGAAACAAACAA[T/A]ACTCAGTAAGAGAAGCTTATGGAATGGATT
>A01_2275710
AGAAGCTTATGGAATGGATTACACACAACA[T/C]GAACAGAGCTGGGAGTTACCGAGAGACAGT
>A01_2275825
CGAACTTCTCTGAATACCATCTTCACAGAA[T/C]CAAATATAAAGGATGTAACTTTACGATCTC
>A01_2277532
TGAACATAACGGTGAGAAGAAGAACATGGC[C/G]GTTACTCAGTTTGAACCAGCTGATGCTAGG
>A01_2278194
GACACCAACCATTCTTGTAGGTATTTTGCT[G/T]TGCCGTATCCCCTTCCCAAAATCGATATGA
>A01_2278681
AATCTGGACCCAGTTTTTAGATGAATCTAC[A/T]GAGGGTCTAAGGCTAGATGGGCTTGAGGAG
>A01_2279166
AGGAGAGCCTGTGAACAAGCTTATGAGTTC[C/T]TGGACAAAGCAAATGGGATATCCTGTTGTC
>A01_2279206
CAAATGGGATATCCTGTTGTCTCAGCCAAA[C/T]TAAAAGATGGCAAACTGGAACTTGAGCAGG
>A01_2279409
GCCAGTAACCTTGTGCTGTGGTTCATATGA[C/T]GTGCGCAAAAACTTCTTGTTGGAATCCAAA
>A01_2280025
GCTGCTGGGTAAGTTGTTTTACCCATCTAC[A/G]GAGTTTAGACTTATCAACAGCAAAAGATTA
>A01_2280142
GAGACTTGGTTGGGACCCAAAACAAGGGGA[G/A]AGCCATCTAGATGCTATGCTGAGAGGGGAA
>A01_2280181
AGATGCTATGCTGAGAGGGGAAGTCTTAAC[T/A]GCACTTGCTGCGTTTGGGCATGATGAGACA
>A01_2280229
GCATGATGAGACACTCAAGGAAGCAATTCG[A/G]AGATTTGATGCATTCTTAGCTGATAGGAAC
>A01_2280271
ATTCTTAGCTGATAGGAACACTTCGCTTCT[G/A]CCTCCTGACCTTAGAAGGGTTTGTTTCTTA
>A01_2280781
ACTTTCTGGTGTAAGTTGGGAAGGACGTGA[G/A]GTAGCCTGGAAATGGCTACAGGAGAAGTGG
>A01_2281076
GAGCATTGAAAAGGTTCATATTAATGCTAA[T/C]TGGGTGGAGAGTATCAAAAAGGAAGACAAT
>A01_2281112
GGAGAGTATCAAAAAGGAAGACAATCTCAC[C/A]CACCTCGTTGCTCAGCTCTCTTCAAACTAA
>A01_2281261
CACAGAATTTGAAGTTTCTTTTTCAGACTT[T/C]GACTTCGCCATCAATAAAAGTTTCCTTTTG
>A01_2281858
CTCAAATTACCATTGGATCATCCATCGATG[T/A]TACCATCTGAGGAGCCTCTGCTGCTTCCCC
>A01_2281954
ACAGTTTTGAGTATATCAAATTTCACTTTC[C/T]TTCTTCTTTTTTTTTGTGAATTTACACATA
>A01_2282171
TCTTGCCATCTCTACAGAGTTGGAAAAGAC[A/T]TCAGTCAGATTCTTTCTAGTGTCTGATCAA
>A01_2282280
ATCTCATTTACTTAAAACAGATTATTAGGA[C/G]GAGAAAAATGCTATGAGGTCTATAATGATT
>A01_2283723
AATTCTTTACTGTCAACTGTTTATAACTTT[G/A]CATAGAGAAAATCACTGGATAGTGAACATA
>A01_2283794
GCAATATACCTTTCTGCATGTCGATAAGGG[G/A]TCATCTGCATAAAAAGGAGGATACCCAACG
>A01_2284135
TTCCATGCCATATCCTTTCTTCAGTAAAAC[T/C]TCAGGAGCAATATAGTCGGGTGTTCCCACA
>A01_2285183
TTTTACCTGTCCTTTCATGACCATTTCAGA[C/T]TTCTTTAACTTCTTCATAGCATAAATATTT
>A01_2286989
TACTGTTCTTACACAGATCAATGATAGTGA[C/T]TTTGGGTTTCCTAGGCCGGTCAAGAAATCA
>A01_2287202
AAACTAACAGGATAAATAGAAGAAAAAATA[G/A]TGTGTTATCTTTTTCTTTACAAGTAAAAGT
>A01_2290772
CGAATGAAACTCATCCGCAAACACACCTCC[A/G]TATATACTCTCTCCACCTGTTACACACCAC
>A01_2290910
CGTGGGATCGCCGCCTTGGACGAGGAACCC[T/G]GGAATCACACGGTGGAAGATGGTGTCGTCG
>A01_2291003
CCGCACGGATTTGGGAGCTTCCTTGGGCCA[C/T]AGCTCGATGTCGATTGGGCCATGAGTTGTA
>A01_2291552
GTTGTGTTATATGTACAGTCCTTTTCTTCA[T/A]TAACTTCCATGAAGTTACCTTCACTTAGCC
>A01_2291597
TTACCTTCACTTAGCCTACCCTTCTTTTTC[T/A]GTAAAAGATTATTCAAATGTTCAACTTTCT
>A01_2291855
AAGTCTTCTTCTATCTCCTGGTAAACAATA[C/G]AAAGAGTTATACTCTGATCATTTAACGCCA
>A01_2294819
ACTCTGTGATAAATACATGTACATCATTTA[C/T]CTATCTGCATGTGTAAATCAGTTCTTCCAA
>A01_2295098
ATATAAAAATATTAGATTACAACATCTTAA[G/C]AAATCACACTATTTTTTAGGGAGCCAATAA
>A01_2295346
TCTCTATTTACTTTCAAAGGAGGAATCACC[A/G]TATGTTTTTAATCAAGCTATCATGACAATC
>A01_2295696
CACTATTTGAGAGAGCCAATAGCACTACCA[G/T]GTTTATGTGGGTAGGTGTAAAATGCAGCTG
>A01_2296157
GTTTAATTTTTAAAATAAACTATATAGTTT[A/G]AAATTTGTTTTCATTGGTTTAAGGTAGTAA
>A01_2302238
CAGAATAAACAATTTTTCATAAATAGTACA[G/A]AAGAAATATTACTCCTATAAAGAAATAAAA
>A01_2302431
TTGGCTATTTAATTTTCCCTTAATTTCTAT[A/T]AATTATGATTCCTCTTTTTGTTTTAACCTC
>A01_2302495
TGATTCTTTCTATATATACAAATACAAAAC[T/C]ACCTCTTCCTCTTAACAAACCTCTCTACGT
>A01_2302594
GCTTAGAACGTTTCTCCAACGACGCCGTTT[A/C]CTTAGACCTCACTCCTCCTTCTCAAACCTC
>A01_2302652
CTCATCCACCTCTCTCTCCATCGACGAAGA[A/G]GAATCATCTGAGGCCAAGATCCGACGGCTC
>A01_2302697
CAAGATCCGACGGCTCATAACCGAGCATCC[C/A]GTGATCATATTCAGCAGATCCTCTTGTTGC
>A01_2302916
CCGTGAGTGTGTAGGAGGTCTTGAGTCCCT[A/C]GTCGCGCTCCATCTAAGTGGTCACCTTGTC
>A01_2302948
TCGCGCTCCATCTAAGTGGTCACCTTGTCC[C/A]TAAGCTTGTCCAAGTTGGAGCTCTTTGGGT
>A01_2303370
GATGTTTATATCAGTTATTATTCTTAGTTA[C/T]TGTTGCTAGACACTAGTTACTTTGAAAACA
>A01_2303764
CTCAAACTAATAATCCTTAATTACAAAAAA[T/A]TAATGTAACGAGGATCACCATCTTAACCAA
>A01_2304459
CGTTCTTAATTTATACCATTAGACTACATG[G/A]TATAGTCATGTTTGTCTGTGTTTACAAATA
>A01_2304617
TCTCTAGACTTCGGTCAATTAGTCACATAA[C/T]ACATATACGTGCATTGAAAATTGGATGTAA
>A01_2305328
TGTCTTCAAAATTAAGGTTATGCTTTTCAT[A/G]TATATTTTTTAATTTGCAAGTTGATGAATA
>A01_2305562
ACATAAAAGTATACAATTATTTAATCATTG[C/T]ATTGCGCCATTCGTCTTTTCACAATTTATG
>A01_2306072
ATATTCTTTAATTTTGATAAAAAAAACATT[A/C]TTTAATAAAATAACTCTATAATGTATTTAA
>A01_2306276
TCTTCGCACTTTTATTGAACACTAGTCAAA[C/G]CTTTGAACAAAATAAAATAGGAGATATTTT
>A01_2306848
TATCCCAACCCGAAGTGTTATTGACCGAAC[T/C]TAAACATATATTCCAAAAAAAACCGAAAGA
>A01_2307023
GAACTTTTTCTTATAGATAAACATAAATAT[C/G]TACTTCAAATACTCAATTCCGTGCTTATAA
>A01_2307945
GTGGAGAGCAGTGGCCCAGCCGCAGTAACC[G/A]TCTCCACCAATGACCATAACACGTTTTGGT
>A01_2308234
GATGAGAGTAGCTGCGCCATTTTTAAAAGG[T/A]TTGTTCTTGATTTTATCAAACACACATTCA
>A01_2308555
AGTATGAAGAAGAGTGAGATTAAATGCACA[A/T]TGATGGAGGAATGCTTACAGCTGAAAGCTT
>A01_2310008
CTTTTCTTGTCTATGTCGTTGGATCATGAA[C/T]TTTTCTAAAATCCACAAAATATCTGAAAAT
>A01_2310419
GGCGTCTCGCTTCCCCTCGTTGGAGGAACC[C/T]TCCTACCATCAAACGGTGGTCTAATGAGAG
>A01_2310460
AAACGGTGGTCTAATGAGAGGAGCCAAAGC[A/G]TTCGCGGCAGGAGTCATCCTCGCAACAGGG
>A01_2310496
GGCAGGAGTCATCCTCGCAACAGGGTTCGT[C/T]CACATGCTCTCCGGAGGCTCCGAAGCTCTC
>A01_2310526
CCACATGCTCTCCGGAGGCTCCGAAGCTCT[C/G]TCCGACCCGTGTCTCCCGGAGTTTCCATGG
>A01_2310849
GTTTTGAGGCTCTGGCGAATAGGAGCGGTG[T/G]CGCAGGTCATGGCCATGACCACGGGGACGT
>A01_2311015
CATTCTAATGAGCTTAAAACAGCTGAGTTC[G/A]TTCATTCATGCACAATGAGCTAGCTATGGT
>A01_2311737
CCTGATGGCTTTCTTCTTCACGATTACTAC[C/T]CCAATCGGTGTGGCTGTAGGAACAGCCATT
>A01_2311902
TGCTGCGGATTTCTTGAGCAAGAAGATGAG[C/T]GTTGATTTTAAACTTCAGATTGTGTCTTAT
>A01_2311977
TGGTGCTGGGATGATGTCTGCTCTTGCAAT[T/C]TGGGCTTGATTAGTTTTCACTTCTTGATTT
>A01_2313051
GTTTGCCTGTATATCATCAAAACAATAGTT[A/T]AAAATCTTATTTTTCCTACTGTTTATCTAG
>A01_2313091
TTTTTCCTACTGTTTATCTAGGAATGCTAA[C/T]TAGTAATCTTTTCCAAAAAAGTTAGTACCA
>A01_2314168
AGCGCACATGGCGAAATACTGCGGATACGA[T/C]CACATCGACTCCTTGGTCGACGACACCGTC
>A01_2314480
CAACTTCCAGACCATGATCACCGATCTCAC[C/T]GGACTCCCCATGTCCAACGCGTCCCTTCTC
>A01_2317886
AATGTCAGACACATGGAAGAAGCCGTATTC[C/G]CGAGAGTACGCTGCTTTCCCTACCCCATGG
>A01_2318139
AGCTGCAGTATCAGCTTGATTTACATTCAT[G/A]TCTTATGTTATGTTGTCCCCTTTCTCTCTT
>A01_2318177
TTATGTTGTCCCCTTTCTCTCTTACTCTCA[T/A]TTCTCTTCTCTCTGCTCTTCCATGTTTATG
>A01_2318394
AAATTATTAGTTGTGTTAACGAGAACAGGA[A/T]AGTATGTATATATTTTAAAATAATTATGAA
>A01_2318459
TAGATTTTTCATACGCTGATCATACTTTTT[T/A]AAAAGTTGAGACAAATGTATACATCTCTAT
>A01_2331694
AAAGCAAAAGAAAAATCAAACACAGCAAGA[G/A]AGACAAGATCTATCGACTACCTTAGCCAAA
>A01_2332149
AGTGATAGGTTTTGTGACATATTGTAGGAC[C/T]CACCCGGGTTTTATTTTATTATTTATTTTT
>A01_2332202
TTATTTTTATTAACCAACTTTCTTTCCTCA[T/C]GACCGTCCGTATCCTTTTCACCTCTTTCTC
>A01_2334996
AACAATATTTAAATTTGCTCCACTTTACAA[T/A]TTTTTTTATTTTTTTTTGTAAAAAAAGTAT
>A01_2343882
GAAAGGAGGATTGAAAGAGGAGAATATTGT[G/T]GTTTTCATGTATGATGATATTGCTGATAAT
>A01_2344530
AGAGGGTTTGAACATCTACGCCACAACTGC[A/G]TCAAACGCAGTAGAAAGCAGTTGGGGTACC
>A01_2344569
AGTAGAAAGCAGTTGGGGTACCTATTGCCC[T/C]GGGGAGGAGCCTAGCCCTCCACCGGAGTAT
>A01_2344920
TGCGTCTGCTTACGGTTCTCATGTCATGCA[G/A]TATGGAGATGTAGGACTTAACAAGGATAAG
>A01_2345195
GTACCGAAAGGCACCAGAAGGTTCCACAAG[G/A]AAAACAGAAGCTCAGAAGCAAGTCCTTGAA
>A01_2345339
GCTAAACAAAGTAAGGCCTGCTGGACAACC[A/T]CTGGCCGATGACTGGACTTGCCTTAAAAAC
>A01_2345989
GCTTGTAGAAACTCAAGTTAATGTAAACAA[C/A]GGTTTGCTTATTTATATACCTTCTCGCAAA
>A01_2346206
ACGGAAGTTTGATATCATAACAGGGCACTC[C/G]CCCTTCTCATCATACTCTGTGAACTCCTCT
>A01_2347286
GACCAGTAAACCGATCCGGTTATTGAAATA[T/A]AAGGTCGACGTCTGTTAGTGGACTACAATG
>A01_2347590
AAGTTTTGAAAATAAGAAAAGTCGACGATC[G/C]ATCTATTTTGAATTTGGACAGTAAACAGTG
>A01_2347683
AGAAAACTCGATCGACCTATTTTTGTGTTT[C/T]AAAAAAAAAAAAAAATTTGGTCTCGAAGTC
>A01_2347906
GTCACCGCAAGGAAAAATATAAAAGAATGT[T/A]AAAGCTCGTGCGAATAGTGGGAACGCACCA
>A01_2348463
ATGTTGAAAATTATATTCTAAGGCTTGAAA[A/C]TGGTCTAGTCTATTATGTTCTACGGTCAAC
>A01_2348526
CAAGTGGATATTTTTTAAAAAATATTTCTG[C/A]TGAACCTAAGATAAAGTATTTATATGGGAA
>A01_2348589
TACGTTTTATAGCTATAATACAAAATTCAA[C/T]TAAGGATATGGAAAAGCAGCTCCTATCCTA
>A01_2349228
AACGCCCAAAGCTAAAAGCTTTCTAAAAAT[C/T]TCTCCACCATTTACCGAACAAAGCGCGCCT
>A01_2354042
TATAGTTTAGTTCATGCCTGAAACTTGTTT[A/G]TGAAATACATTTTGCTTTGGTCTCCTTACT
>A01_2354200
CATCATGCTTTCAGTTCTTGTCTATCCGCT[T/G]GCGTGGTCGTGGCAGCAATCACGTAGGAGG
>A01_2354269
TCAGAAACTCCGTGACTTTGTTCGTTCAGA[A/G]TATGACCATTCTTGTCTACGCTCATGTCGT
>A01_2354355
AGGTACATACTCTATCTATTAGAAAGAAAG[T/A]TAAATTGCTAATAATAGTTATATGTGAGAA
>A01_2362358
TGGTGATAAAATTTAAATGTTGTCAGATTT[G/T]ATCTCTAACTGATTTGAGCTCCTTCTGATC
>A01_2362508
TTGAAGTTTGAAGACTGATTGATGTCTTTG[G/A]TGTTAGTCCCAAATGTAAAGTGGCTTTCTT
>A01_2363114
GCTTTCACAGGTTGCAGCTGGATCAAGAAC[G/C]GTTCTTGCAGTTGGACCAGGTAGAGACTAT
>A01_2364373
CTTAATCTTTTTCTAAATTTGGTTCTTTGT[T/C]TTTTCCATTATTTTTATTGTATATAGGTGA
>A01_2364778
AGAAGTGAGAACATATGTATATGCTGTAAA[C/T]GTAGATATCCACATGTAGATAAACGTTAAG
>A01_2365200
TTTGAGCAATTTTCCTTTGGTTAAGGCAAT[A/T]ATACTTATATAAACTACTTTTGTGCTGTGC
>A01_2365729
TATACAAAATGAACTATTTTATCAAATAAC[A/G]AGCGAAGAGAAAAGGAGTAACAACTATTTG
>A01_2365890
AACTCGTATCTACCCAGCCTATAATTATTT[T/G]CTAAATTTTTATTTTCACTTATAAAGTTTC
>A01_2365935
TCACTTATAAAGTTTCTATTTTAAATAAAA[C/T]AAGAGGAATTTATTAAATACCATTAGTAGT
>A01_2366374
AGGTCCCATCGGCCCCGTCCGCCACTGCGG[C/T]GTCTTATCCGTCGCGCAGTGCAGACACCGT
>A01_2366636
AAGATTTGATCCAACTCAGGTTCGGGTTCC[A/G]GTTCTGGTTTGGTTTGGGTTAAACCGGTGG
>A01_2366953
ATGGTAAAGGTTAGAGCCCTTCTTGAAATG[T/A]AATGGAAACTTACCGGAACACAAAGGTCGT
>A01_2367066
GGCAAGAGTACCGGTGGAGACGGTGGAAGA[G/A]TCAGGAAAGGGTTCAAGTCCGTCGTCAGGT
>A01_2367100
GGAAAGGGTTCAAGTCCGTCGTCAGGTTGG[A/C]CGTTGTCGTTAGAAAAGTCAAGAAGGTCGT
>A01_2367157
TCGTCGACGACGAAAGAGTCAGAGTTACCA[C/G]CGGCGACGAGGAAGAGCTCCGGGGTAAGCT
>A01_2367310
ATGTGAGCGAAGAATGTAACGGAGAGAAAG[G/A]GAAGGAGAGAGGTCTATTTTTGGGGAGGGG
>A01_2367651
GAAGTTTTCGTATAAATATAATTCTTTGTG[C/T]TGTCATATCCCTTTGCAGCCTTTTAAGCTA
>A01_2367685
CATATCCCTTTGCAGCCTTTTAAGCTATAT[A/G]AATTTTCTAACTGTGTCGAGAATGACAATA
>A01_2368295
TTGATTAATTGTGTCGTTATTAGATGTTTT[A/T]AGGAGAACATCAAATAGAAACAACCATCGC
>A01_2368685
GGTTTTTGTTTCTGAAAAACTACTTTATTT[A/G]CCAATCAAGATTTTGCTAAAAATGATTTCC
>A01_2368734
AAAATGATTTCCTAAAAACTAGGGAAACTA[T/G]TTTTTCAAATAACTACCTAATTCTACACAA
>A01_2369416
TTCTAAAAAGCAATAATATAATATTCACTA[C/T]TGGGCCGTAGTGGCCCGTTTAGCCTCGATC
>A01_2369769
TGCAGTGACGTCACTATGTAAACTACTAGT[G/A]TTATGTTAAATATTTGGTAAAAAAAAATAA
>A01_2370424
TCATTCGATTTAAGTATTCTTCATATATGT[T/G]CTGTAACTGATGTTGTTTACCCAAAACAGA
>A01_2371255
TCTACAGGGAAAGAGAAATTCAACTGAACA[T/C]TGGGTTATTCAAAATTTTAACAGATTAGTT
>A01_2371320
GTCAAACATATATTATATAAATCAGTTAAT[A/G]TATATTTTATACACTATTGGGTTTGACAAT
>A01_2371418
TGCCATGCACGATAGGACAATGTCAAAAGT[A/C]AAAATATGATCAATTGGTATAAACTTAGCA
>A01_2372729
TTTTTAGGAATAATAAAGAATTGAATGTTT[T/C]TTTTCATTCTTTGGTCACCATTCAAAACTT
>A01_2372870
ATTAGGTTCCCTAGGTTCAATTTCTGTTGG[G/C]GAGGGATTAAGCAATCGATTATTGTCCATG
>A01_2372973
GCCATGGAAGAAAAAACATGTATCCATTGG[T/C]TTCTGTCCCTTTTAGAGTTTAACCTTCCAA
>A01_2373256
AAATTGTTTTTTGCATGCATGTCTCATCTA[G/A]TTTGCAGAATTTTCAATATAATAAATATGA
>A01_2374343
TAGCAGAGTCTAAAGTTTGAATCTCGTAGT[C/T]CCCATTGTGAAGCATGCTTCACAGTTTTTT
>A01_2376809
TTTGGATCTTGAGGTACACAACCTTTCTTC[T/A]AATGTTATTACATTTATTCCTTGGTACACA
>A01_2378000
ATTTCTTCTGCAAGTGAGACCTCATTGTTT[T/C]AAACCTTAATTTCTGTTTTTTTTTATGTTT
>A01_2380128
CAAAATTTGGGTTCACCCCTGTGGTGAACT[T/C]TTTAATTCACCTCACTTCTTTAGACCAATC
>A01_2381218
GTGACGGCGATGAGGACGAACTTGACAAAC[T/A]TGACAAACAAAGCTTCTTATATCCGTGGGC
>A01_2386000
AAGCAAGAACATAAATACATGAGAATTATT[A/T]TTATTTTTTTTTTTTCAAAAAAAAAAAAAA
>A01_2386781
TCAGGTAAAAGTGTCATCATTATTCATCTG[T/A]TTAAAGATTTTACTTGACTCTTGGATAACA
>A01_2392216
AAGAATATACGTGGAATTTTATTCTTAGTT[A/T]GAAATTACAATCAATATTATGATCTATATT
>A01_2393591
TACTATGCTTTAGCTACACATGGACATAAA[C/G]GACAAAGTTTGTCAGCCAAATGATGTGGAA
>A01_2396634
CAATGCAGAAACTCCCTAGACGCGTCGACA[T/A]ACTCATTTGGTTGGGGATGGCACATTAACA
>A01_2398833
TACACTCCAACGTAAACAGAGAACAACAAT[C/G]AACCAACCAAGACACGGTGAATCACCTGAT
>A01_2399154
ACACAATCCTAAGCGATCTCAAGCCGAAGG[T/G]GAGCAGAAACACATATTGCTAACTCAAAGA
>A01_2401159
GATAATGGTTCTTATAACTATTAATTTCGA[T/C]AATATCCGGTTTAGTAATTTTCTTAATTTT
>A01_2401222
TGGATGTTTTAAAGAAAAAATAAAACAAAA[G/A]AATAATAAAATACTTTACAAACATGTATCC
>A01_2402491
TTTTGCATCTTTGTTCTCTGTGTTATGTTA[G/T]GACATTGCTAATTTTTATATGCCTTATCAG
>A01_2402638
AGTTTTTTTTCACTATAATCTCTGCAGCTT[C/T]CCTATCTAAATGGTGTTAAATGTGCTGATG
>A01_2402757
TTGCCCTGGTCTTAATACAGTAATCAGGGA[A/G]ATTGTCTGTGGTCTTCACTACATGTATGGT
>A01_2403471
AACAAATGTTTTTTGACTGATGTTGCAGGA[G/A]ATTAGACGTCGTGGACTTAAAGTTGCTGTC
>A01_2403849
CACTGCAGGGTTCATTGCAATGTACGCGAC[T/G]CTGGCCAGCCGGGACGTTGACTGCTGTCTG
>A01_2404468
ATTCCCTTCAACGTAAGTTTCTTTTCGCCT[A/G]CATATCTGTATGCCATTGGTTCATCAGCTC
>A01_2404951
ATTAACGTCTTCAAAGGTTTGTCATTTTCT[G/T]GACTTCTCCATGATCTTGGGCGTAATCGTT
>A01_2406369
AACCATAAAGCCGGAGGATATTGGGGTGCC[G/T]AAGATGAGACTGAATCTCTACTTCTCGTCT
>A01_2406406
AGACTGAATCTCTACTTCTCGTCTGAGCTG[G/A]TGTTCAACTTGAGATTCTTGAAGCTGGGAC
>A01_2408347
TCTGTCACAAAGATATCACGAGGGTCTTCT[A/C]AAGCTGCAAGCTAAAGACTACGAAAAGGCT
>A01_2409288
GGACAAGAATGCTGCTTCCAAGAAGTTGAA[G/A]AAAAGAGTGCAAGTTAAACTTCCTGAAGCG
>A01_2409423
CATACCAATCACCATTGAATTAGATCTTAG[T/C]ACAGAAGCTGTAATGCAGGGTCCGGAAAAG
>A01_2410302
GTGTTTGGCATTGTTGGACAAAGAAGGTAT[T/C]GGAGAATCTCCTGTCTTAATTCAGCTGCCC
>A01_2410422
TAAGATTGATGTCTTGCTGGAAAAGACCGT[G/A]CCTGAGATGATGGAGAAAGAATTATATCCG
>A01_2411456
GCTCTGCTGCGCTGGTAAAAATTGTGCGGG[G/A]GAGGAAGGATCTTTTCTCAGATTTGCAATT
>A01_2411531
TGTGGACATGAAAGTCAAATCCAGTATCAA[C/T]TCCCCGGATGGCCTTGGACATGATATGGGG
>A01_2411600
CAGAAATGAAATACAATCATTTGTCGCAGA[T/G]TTGCATGTTGAGAGAAACGAAAACACAAAA
>A01_2411732
CAAAAAGATTCCTGAAGACACAGAAGAAGT[T/C]GCTGAAGAAGAAAAAGATGAACTTGAGTTG
>A01_2411957
TGCCAAGGCTTCTTCTGTGAGTAAAATTTC[T/C]TCAACTTGGTAGACCCATTTGCATGTGTGT
>A01_2412030
CCAAACTATTTATTTTCCTTATACTTGGTG[A/C]ATAGATATTCAGCGTTAAATCTTTAGTGGG
>A01_2412255
TGCATGAGCAACCGACATGACACACAGAAA[C/T]TGGAATGTGTTGCAAGTTGTGTTCCGTAGA
>A01_2412334
GATTTGTTCTCTGGTAGACTTATAGCATAT[G/C]CTTCATTGATCTTCCTAAACACCTATTGTA
>A01_2412421
TCTGGTGTTTAACAAATAAGTTATAAGTAT[G/A]CACTCTTCAACCGTATGACAGTATGTGATG
>A01_2412532
GTCTCAGAGAACTGGACTAGTTAAACTCCG[C/G]AGAGTCTTGAGAGCAATTAAAAAGCATTTT
>A01_2412588
ATTTTTCACAACCACCAGATGATCTCCTAG[T/C]TGGCAATGTGATAGATACATTCTTAGATGA
>A01_2413428
AGGGATGAGTTATAACCCTAGGATAAGAGA[G/T]GGTGGCTATGTGTCTTTCATTGAAGGGTGC
>A01_2413851
CTATCATATTTCTGGGTGTAGCTTTAGTAG[C/T]CTTTACTAATATGTGAACATGCATTAAACC
>A01_2414478
ATCCTATTATGAGCAAGCCATGACATTGAA[T/C]CCGTCTGCAGTAGATCCTGTGTATAGAATG
>A01_2414664
TGTTTGTAACAACAGCATCATGGTTTTAGA[A/G]GAAAAATCATGCTTAAATCTAATCTCAGCT
>A01_2414722
GCTTAATCAGTCCACTATTGATTTACTTAT[C/T]TGCTTTTGAGGTCCTGATGGACTGTTTAAT
>A01_2415192
AGGTACAGACACATTCTTACTTGCCCTGAA[A/T]TTTTTGTATTAAGGGGCTTTAACACTGGTG
>A01_2416217
TCTCAAGTCAGGATTCTGGAATTCTTCGTT[T/A]GAGAATCCCTCAGAATCTCAAATGCTGGAG
>A01_2416531
TGTGGGCTTACACGCTGTTTCATGGACATT[G/A]TGGAAGCATCTCTCAGGTCGTGAAATATAT
>A01_2416571
CTCTCAGGTCGTGAAATATATGGAAGAAAA[C/T]ACCAAGGTACTGAAAACCAGTCTGCTCATT
>A01_2416708
TCCTATTGACTTTACAAACTTGTTTTTTAT[A/G]GAGTTGTTGCTAGATATTGAAGTTTTCTAA
>A01_2417193
TGATTGTCAAAGAGAGAGTCCTTTCGTTTT[T/C]ATTTCTTACTCTTCAAAACCAATTTCCATG
>A01_2417484
ATTGTCATATAGTGTGTCAACCCATTGGAT[A/G]TACTAATTTATAGTTGAATGATGTAAATAA
>A01_2418806
CGCTTTCCCATCTCCAGTTTCATCTTCTTC[A/G]TATGCGTTTATGAAGTGAAACGTTACGTAT
>A01_2419564
TGTAAAGCGCCGTCGGCTCAGCTCTAAGCA[A/G]ATTCCTCACCGAATACCTCAGGGGCATTTC
>A01_2419595
ATTCCTCACCGAATACCTCAGGGGCATTTC[C/T]GGTATCAAAACATAATTCTCCGTTACCGCA
>A01_2420464
TTGATTATATTACAAGTTTTTGCTAACACA[T/G]TGTTACTTGTTGGTGTCTAACTTGGAACAT
>A01_2421039
GTTCGGCGGGAGAAAAATCGGTGAGAGATA[T/C]GGAGTTTTGTTTTTCTTTGTTGGTTGTCGT
>A01_2421069
TGGAGTTTTGTTTTTCTTTGTTGGTTGTCG[T/A]TGGCTTTGTCGGAACAAAGTGTAGTGATTC
>A01_2426788
CATTATCAGCTAGGGCTTCTCTTTATTCAT[T/C]ACAGTATATTTATACTATCATAATCATAAA
>A01_2426869
AATTTTCTAAAATTTTGTGTTAGGTGAATG[C/T]CGTAGGAACTTGAATCTTTGCTGGGCGTTT
>A01_2426911
GAATCTTTGCTGGGCGTTTTTCATTTATCA[T/C]TCGAGTGGCTCCAATAAATGGTTCAACGTA
>A01_2427867
GTCAGTGTTAAAAAAAGAAAGATATCACTA[G/T]CTGAAACAACGTGAAGAGAGGTGTGCATCC
>A01_2427931
GTTGTATATGGTTCAACCGGCAACTATCTC[G/A]TAAACACATGAAACTAATAGAAAAAAAATG
>A01_2428310
TACGGCGTTTTGTAAATAAAGATTCACCAA[G/T]CTCTACATGCCGTCATGCAGAAATACTATA
>A01_2429729
ATATAGTTGTTGGCCCTAGTTAATGTTACT[G/C]TATTCTACTTTTTAACAAATTGTCTCTACT
>A01_2430333
AAAAAAAAATTAGTTAATTAAGTTTTTTTT[T/A]AGATAAATTTAGTATACCAACCCCCTACCC
>A01_2430494
AAGATACATATTCTAGATAATGCATCACTC[A/G]TACATCAGTTAGTTTTTCCAATAATCAAGT
>A01_2431012
AAGCTTTCATCGAAAACAGAGTTCAACGGA[T/G]AATCATTATTATTATACGTAAAATCATCTC
>A01_2431266
CGACCTTTTACTCGACGCGTTACTCTCGCT[T/C]TCTGACCCTTTATCATACGTCGCCGTTTCG
>A01_2431801
AAAACTCAAGAATATCTGACGCGGAATGAG[A/G]GAGGAATTGTTATAAAGAGTTAAAAGATTG
>A01_2431864
CTTGTTTGTATCACTATTTGGTGAAATTTC[T/C]AAGTCTAGTTTTTTTTGGATGTTTCCAAAT
>A01_2432246
TCGCTAAAAAGAAGAAGAATTACAATAAGA[C/T]TCGGATTGTCTTCAATGTATTAACTTGTAC
>A01_2433814
TACTTTATTTTTATGTGTTATTCTAATTTC[T/C]TTTCAGAAAAGGAGAAGGAAAATATTATCA
>A01_2434218
TTGAAAGAATAATTCTGATGATATTGATCA[A/G]ATATTAGAGTTTGAGTTCTTTTATTGCGAC
>A01_2434308
CATATTCAGTTGTTTACATGCTGCTGCAAG[T/A]ACTCCGGTTCATATTTTTGGTAGAATTTAA
>A01_2434527
TTTTCCTTCCCATCCACTGAAATTCTATGA[T/G]CTGGAATCAGGTTTTAACAGCCCAAAATTG
>A01_2434652
TAAAAAAAGAGTGAAGAAGTCGACAAAAGT[T/C]GAAGAAGAAGAAAAGAAAAGTTGTACGGAC
>A01_2434914
ACGCAAGAAAAATACAATATACCAGAAAAA[C/T]TAGCGAAATGCAAACTAAAACTTGATAATC
>A01_2435369
TTAAGATCACTCGATCAAGAATATTAAAAA[A/T]TCTTTCATTTATATATTTTAATTATATAGC
>A01_2435451
CTTTTATATGAAAATTTTTGGTATTTGTTT[G/T]TAGATTTTACAAATTTACTTTCATATTATG
>A01_2436826
CAATGTTTGTCGTCGAGCATCCACAAGTCA[A/G]TTATGTAGAAGTTCTTTTATTAAAGATGAA
>A01_2437505
CTCGACCATTTTTTCTACTCTTCCTCCTCT[G/A]TAAGCCCATTCCGGTATATCTCGGCATACT
>A01_2437577
GCCTGCATCCAAAAGCACCCAACCAAAAAT[T/G]ATAGGTTTCTAAATAAGGTGAAAAAAAAAT
>A01_2437849
GTTTGCTCTTCATTTTAAGTACCACCTATC[T/G]CAAAATGAAAGAGTCTATATATAAGAAGAA
>A01_2438386
TTTGAATAATTTAGCCGTAAAATATGCTAT[A/G]TATTTTGAATTAGGATTTTTAAAAGTTTAC
>A01_2438810
AGCGTTGCGAGTTCTGGTTTCTTGTTTCTT[T/C]TTCTCCTTCTGATCCTTGAGTCTTCTTCCC
>A01_2438881
CTCTTACCATGCTCTTGTACAAATGCTGCA[G/T]CACTCATATTAAAACTTGTATATAAGGTTC
>A01_2438916
CATATTAAAACTTGTATATAAGGTTCATTA[T/A]TATATACATTATTGTAATCTTATTGTGTGT
>A01_2440111
GTGCAATTTCTCATAGAAGTAAAACATCAT[C/T]ATACCGAACCAGACCAGCCGAACCGGTTTA
>A01_2441097
ACAGTATAAAACTTTGAAAGAGAATTTTAT[C/T]CCAAAAAAATTCTTCACTTTTCATCTGACT
>A01_2441289
TCTATCGAATTCCTCAAATGGGTTTTGTGG[G/C]TATAAATTTAAGTAAAACAAAATGATGGGT
>A01_2442049
CTACTGCTCACCTGCAGCAGCAGCAACTGA[G/A]TTGTTCTTTACTTTATCCTGAGATTTTTTA
>A01_2442604
TTAGAAGCAAAGGCATCTCACTCAGAAACC[A/C]AATGAACAGATAGGCACACAACCAGGACGC
>A01_2442908
CCAGCTTTAACACAAGGGAGAAGACCAAAT[A/T]AAACACATAGACGACGCAACAGCCTATGAA
>A01_2443008
AGTGCCAACTGATTTGAACCACCGCAGCAA[A/G]TTGCGAACTTGCGATGATCCTTAACATAAA
>A01_2443196
AAAAAAAAAAAAGCTTTGCTATCAACTGTG[A/C]GCTCCGTGTTTTATAAACACAATGCTCAAA
>A01_2444782
TCCAGCCTTGAGAAGTTCCCAACCAAATCC[T/C]TAGTCTCTTGACAGAGGAGACTAAGACGAT
>A01_2444817
CTCTTGACAGAGGAGACTAAGACGATCTTC[G/A]ATCAGTTTCATCTTCTCCTTTTGGGTCCAC
>A01_2445109
ATTGCCTGATTAGAGTGATTATCAATATCC[A/G]TATGATTATTATCAACATAAACTGTAACAG
>A01_2446162
TCTTTTCATGTGTGATTTTTTTAGTTTGGA[C/T]AATTCCTAGAAAATATCATATTTTACATAA
>A01_2447750
TTTCGTGTGATGGTAAAAAGGATTCATATT[T/A]AGCTGAGAGTGTTTGTTGTTTTGTTTTCTG
>A01_2448162
TTTCGTATTGGTGGGTTATACGGTTTGGTT[A/T]GGTTAACGTGATTTTGAAAACTAGTGAACG
>A01_2448344
ATACGATATTCTAAAAAAAAAATCTTGCTT[C/G]GTGCTTCAAACATAAGAAATTTTTATAAAA
>A01_2453477
ATAATGGAGAATCTATTGGAATCTTTCACT[C/A]TCCCTTGACACACAAGGAATGGAGTTAAAA
>A01_2453770
ACACTAGGACCTCTCCGTGTTCGTCAACCC[T/G]TTGTTTTGACACCAATATCTCAACCTTCAT
>A01_2454611
TTTAATTTCAAGTCTGGCTTCTGCAAATAT[C/T]AACTATTTATAGGTCTTATTTATGGGCTTA
>A01_2454677
ATGACAAAAAGCTCATTAAACGATAATATA[T/C]TAAAATTGTGCCATTTATGTTAATTAGACA
>A01_2455255
AGACGATGATGATGGTGGTGCCTGATGCGA[C/A]GCCTGGTCTCTGATGGACATGCCATGCATT
>A01_2455956
ATAACCACCCTGAGGAGGAAATCCATTGGA[G/T]TGTTGTAATCCAGCTTCTCCAGCTTGACTA
>A01_2456032
AATTGAGGATTCAAAGGGCTACTCTGGGTA[A/G]CTGAATTGCCAGTTGGTGCAGTTGCAGGAC
>A01_2456119
ATATCGAAAAGAGCAAGTGCATTTTGATCC[G/A]ATGCGACCGGACTTGCTGATGGTTGAGGTT
>A01_2457370
GGAGGTAAATCGTCTTACCTCTCGGTTTCC[C/T]GGCTCTATTGCACTTAGCATTTCCGCAAGC
>A01_2457412
ACTTAGCATTTCCGCAAGCACATCCATGAT[A/G]CCTTTTGCATTTTGAATCTCCGACAAACTG
>A01_2457447
TTGCATTTTGAATCTCCGACAAACTGAAAA[G/A]GAATTTCGATATACAACAGAATAAATATTG
>A01_2457670
AGAGAGAGACTACTTAATTGTCGTTATTTT[C/A]TTGATTCTAATCACATCTCAAATGTGCTAT
>A01_2458019
AAGGTTTGGAGGGTAAGACGACAAAGGCTG[T/C]GTTTGTGGAGGTGTGAACACAGGTGCTGAT
>A01_2458402
CTTAGCTATCCGGACCATCTCATGAATAAC[A/G]CCCTTCTCAGCCACATGCATATGAACCATG
>A01_2458584
TCATTCATGTTAGGCTACTCATGTATATCG[A/C]AAAATCTTCGTGCACACTAATACAAAAGAG
>A01_2458618
ATCTTCGTGCACACTAATACAAAAGAGGAG[C/T]AAAGTTAATTGTAGTGAGTTTGATACATTT
>A01_2458681
AGAGACAACTGCCCATGGATCCTTTGAACT[G/A]AGGCTATGTATGTAACTCAAACAAAACAAG
>A01_2459023
AAACATAGGTAGGACCAATCAATCAAAGGA[A/G]TTGGAGGGAGGGAGCAGTAGAGAGGCGAAC
>A01_2459111
ACAGATCTCGAGGTTCATGGCCCAATCAGG[C/T]CCGATCAGCATCTCGCTCGTCGCTCTCTCC
>A01_2459264
CAGGAGGCGTAAGAAGATCACGCACGAGAA[T/C]ACTCCGGCGAAGAATCTCTCCCTCAGGAAT
>A01_2459359
AGATTTGTTTTTTATTTTTTCCTTTTTTGT[C/T]TCTCTATTATTTAATTTTCAGTTTTTTTTT
>A01_2459398
ATTTAATTTTCAGTTTTTTTTTTAATATTT[T/G]TTTATGTGTTCTTCGGATTATCAGATCAAT
>A01_2460367
ACGGATCAGGAGACTGTGGATTTTTACTGG[G/A]TGGTTGTTTTTCTTCCGTCGATGATGCTCT
>A01_2466979
GGTGCCCAATGTAACAGCTTATACTCTTTC[A/G]AGCAGGCAAAGATCTTGATTCTTGAAAAGT
>A01_2467927
ACCCAAGACTTCCAAAGCATCTGCATATGC[C/T]GTAGCTGTGTGTTCACTCAAGTGTTTCATC
>A01_2468082
ACAACAAGTAGAGAATCCAGAAACTAGTTT[C/T]ATTCAAAGTCTATTCCATCTCACATTACCT
>A01_2468405
GGTTTTAATTCCTGAGATTACTGATAAAGG[A/C]ATCTCGTCTGCTGTGAATGGAGGTTCTGAC
>A01_2468445
GCTGTGAATGGAGGTTCTGACGAGATTTCT[T/C]CAGTTGGAATAGTAGCTAATGACTTTTCGT
>A01_2468483
AATAGTAGCTAATGACTTTTCGTGTTGGTC[T/C]GATGGATCTTTCGCAACTGTATTCACTTTG
>A01_2468672
CTTTTAAGGTTAAAATATTGGAGAAAGAGA[G/T]ATTAGATTACTAGATGCAATGTGCTTGAAC
>A01_2468739
GACTGTCACGTTCCAACAAGAAGACATTTC[A/C]ATGAACTAGATGATGTGTTAGGCAACGAGA
>A01_2470348
ATGGAAACCATAAGAACAAATAAGAAAATA[A/G]CCAAAGAAGAAGGAAAATGCATAATCATAA
>A01_2470760
AGAAGTAGAGATTATGAGCATATACCTTTC[T/C]CTACATTGCTTTCCAATGCGCCCAGGTAAA
>A01_2470837
ACCATTTCGATGGACCATATTTTTCTACCA[G/A]AGCAATTATTGTGTTATCCTCCTTTGAATA
>A01_2470868
AGCAATTATTGTGTTATCCTCCTTTGAATA[T/C]ATGAAAAAAAAATAAGATGTCATGAGATCA
>A01_2470961
CGCAATTTCACCACCTACCTCTTTGGACCA[A/G]GGCCCTTTCACAAGCTCTGGGTTCAAGACC
>A01_2471231
ACCTATCTTCTTCCAGTTCTTTCCTTGAAA[A/T]CGCTCGACAGCTTTGCACAAGACTTCGTCC
>A01_2471778
TTTCTTTTGTTTTGTCTTTTACATATCCCT[A/T]GTAAGCTTTTAGCACAATGCCCACATAGCC
>A01_2471896
GAGCTTACATATACAGTACTCAGGTGATGA[C/G]ATTAATTCCAAAGAAAATAAAGATAATAAG
>A01_2472031
AGTGTGCTGTGAAGAGAAAACAAAGACAAG[C/T]TTCAAAGAGTAGATTTTGACCTTTGATTCA
>A01_2472205
TTCAAAACTGAGTGTGACCTTAAGAAGCAG[G/A]AGATGAATCAAATCCAAGAATACAGGGAAC
>A01_2472430
ATTTCAAGCTTGTGAATCTAAAGTCTCCCA[T/C]TAAAGTTCCACGCCTATATTATTTTTATTT
>A01_2472460
TTAAAGTTCCACGCCTATATTATTTTTATT[T/A]ATTTATTCATTAACAAAAACGTTTTCTTAA
>A01_2473025
TAAAAACGAAACCAAATATGATCTTAGCAA[A/G]AATTTGCTAAGAAGCAATTACTACAAAACT
>A01_2473272
GACCACCCGGGGAATCAGATCCCCTCTTTC[T/G]CCCGAACCTCCCTCCTCCTCGTTTCCCTCC
>A01_2473966
TAGAGCACCACCCTTTTCTTCTTTCTCTCC[A/G]TTTTTAGCTGGAGAATCAGAAGACTCATCG
>A01_2475279
CTCTCTAACAGTCTTCTTGAGGAAATCATC[G/A]ATGGGAAGATTACTATCACTGAAGTAAAAC
>A01_2475318
ATTACTATCACTGAAGTAAAACTCCACCTA[C/A]ACAAATCGATACCAAAACATAATCAAATAA
>A01_2475573
GCTTCGGTTCGAATTTTTGTGTCTATAATT[C/T]TATTTTATTTTGCATTTGAGCCCTCTATTT
>A01_2475676
TTAACTGATTTGCCCCAGTATGATTTACAA[C/T]CGGAAATTTAACCCTGGAATAATCTCACAA
>A01_2475828
AGTTGTTCTGCCTCCTCCAAAGTTTAGGTT[G/A]TCGGATAAAGTGTTTCTAGTCATGTTATTG
>A01_2476712
ATTTGGGTTTTGTGTCTATTTCTTTTTGTA[T/A]TTGGTGATATTTTATAATAGTTGCAAATTA
>A01_2476828
TCTAATTTTATTATTAGCTGAACTGTTTGT[C/T]TATGATGTTTTATACCAATAATCTAGTTTA
>A01_2477053
TTTGAAGTTTTCATGCTTTATGTAGAAGTC[G/A]TCGTGTTTACCGGTTCGACCATGAATCTGA
>A01_2477099
CGACCATGAATCTGAACTTGATACAAAAAT[A/G]TTGTTTTCATCTAATTTCAAAATAATTTAT
>A01_2477130
TTGTTTTCATCTAATTTCAAAATAATTTAT[C/T]TTAAAACAATAGATGTGCTAAGTGTGATCA
>A01_2477321
ACATACTAATTTATATCAAATATTTTTAAC[T/C]GGAAAATCATCCGCATTTTTGAAACGCGAG
>A01_2477405
TTTTTTTTGCATCTAAATATAGTATAACTT[T/A]AAAAAATGAAATAATATTATCCTGTGTGTC
>A01_2477735
ACTCTCTTCCATTATGTTATACATCAACAA[C/T]ACAGCAAAAAAAAAACCATTAGCTTGTAGT
>A01_2478054
TTAAGAAAAATTAAAAAATTTGGATGCCAA[C/T]ACTAATGTTTTATCGGGTTGTGCGTTGATT
>A01_2478129
CATTTGCGATTAGTGACAATCAATGTTTTG[T/C]ATTAGGCAAATATCGAAAGGAAATGAATAA
>A01_2478264
CTCATGGTTAAACAATGTTCCTTGCAGAAT[G/A]CTATAACTTGTTTTTTTTCGTGACAAGTAT
>A01_2478375
AAAAATAGATAATTCTATCTTTAGAAACAT[T/A]TACTTTGTAAAAATTCAACGTGCTGAGCTA
>A01_2478513
ACAATAAAATTGCTATGAATTAAATTAGGC[T/C]GACTCAAAGTATAAGATAATTTAATCAACA
>A01_2478569
CAACAATTTTTTTTATTTATGTTGCATCCC[C/T]TATATATTAATTGAGAAACATTTGAAAAGA
>A01_2478608
AATTGAGAAACATTTGAAAAGATGTGAGCT[C/T]AATTTTGCAATAACTAAAAAAAATCACTTG
>A01_2478639
AATTTTGCAATAACTAAAAAAAATCACTTG[T/C]TTATGTGTCAATCAATTAGGTAGTTAATTA
>A01_2478684
ATTAGGTAGTTAATTAGTCATACGTGTCAG[T/C]TTCACATTGAAATTGAAAAACATGTTGGTC
>A01_2478797
GATATTAACTAAATCAAGGTGGCTAATTAT[T/C]ATATATTATTTAATAAAGTAATAAAATTGT
>A01_2478835
ATTTAATAAAGTAATAAAATTGTATTTATG[T/C]TGTAAAAAATAATTGGTATATGTTAATTCT
>A01_2478971
TTATATTTTAATTATAAGTTTAAATTTTAA[T/G]TCATACTAACAAACTAATTTTGTTTTTTTA
>A01_2479093
TCTTAAAATTATTAATTTGTAGAGTATAAA[C/T]TATTAACAGTATAAACATCTTGTGACAAAA
>A01_2479357
CGAGTCTGGATCGATGGAGGTGGAGCGTCT[G/T]GACATTTTTCGTCACATCGGCAATAACGCT
>A01_2479602
ACCTCTTCAATAATTTTATATCAACCACAC[A/C]TCAAAAAAAATGTTAGCTGGTGGTTAAAGA
>A01_2479771
ACGAGAAAGATGAGAAGACAAGAAACTATA[T/C]ACCAAGTAGCAGATCTCATGGTTAAAGATA
>A01_2480352
TTAATCTTAGCGGAATATAAGAAACTGTCT[T/C]TTAATTTTTAACTAAAAAAACTAAGAATCG
>A01_2480517
TAATCATACTTTAATCATGCCAATAGGACC[C/G]GTAGTTGTGGTGAAACTTATTACACTTTTA
>A01_2480778
TTCGTGTGTGATCTCCACACTACAAACACT[C/A]ACAACTTCTCTTTTGTTATCAGTAAGGACC
>A01_2481862
ACTGCTCGACTGAGAAGGATTGATTCCATA[T/C]TTTGAAAGTTTAGAATCCGTGTTGAACCTC
>A01_2481902
TTAGAATCCGTGTTGAACCTCCTCTTACTT[G/T]TTCCATACATTAGAGGGTTGTCACTGGGGT
>A01_2481936
CATACATTAGAGGGTTGTCACTGGGGTTTT[T/C]AGAAGAGCTATACGTTCGGCCACTCCCTTC
>A01_2482419
AAATTTAAAATCTGGAATTCTACAAAATCT[G/T]GAAAATAGATTGATTGAGAAACTCATACTA
>A01_2482522
GTGACTAACAAAACTTATTTGTGTGTGATC[T/C]CCACACTACAAACTCTCACAACTTCTCTTT
>A01_2483027
ACTATACACCAGGTAGCAGATCTCATGGTT[G/A]AAGAATAAATATAGAAATGGTATAAACAAT
>A01_2483510
ACACAAGCAGTGTTCTTTGGAACCCTTCAC[T/C]GATGTCAATCAAATAGCTACAAATGAATGA
>A01_2485929
TCCAACGATCACACCGCCGAATAAGAATCC[T/G]GCGGAGGATCTGTGATACGGCGTCGTCTCG
>A01_2485977
CGGCGTCGTCTCGGGGAGACTCTTTGGTAC[T/A]AGTGGCTGTGCTGTTCCCGGGGAGATTGTT
>A01_2486121
GGGAAGAGTTGTTGCTGCCGGTGAGTTCTT[C/T]GGCGCCGGAGTGGATGAAGACGGGAATGGT
>A01_2486156
CCGGAGTGGATGAAGACGGGAATGGTGATG[T/C]TGAGAGTGGTGGTTTAGGTGGTGGGGAAGT
>A01_2489658
GGCAAGTGAACAAATTGATCCAAGTGTACA[A/G]TTTAAGAGCTTTGCCAACGTCCGGTGCTCT
>A01_2489703
CAACGTCCGGTGCTCTTTGATAATTGGGAC[A/T]ATAGGATGCTCATTCCTGGGACAAAATCAT
>A01_2489809
AAAAGGTATGTTATCCTTCGTGATGAAAAA[A/C]GAAAATATTGTAAGCAAAAGCAATTATCCA
>A01_2489870
TTTGCAATACCTTAAAAGATCCAAGCACTG[T/C]TTATCAGTACTTGGATGAAGTTTCCCTTTA
>A01_2489906
AGTACTTGGATGAAGTTTCCCTTTATTTTG[A/G]GTTTCCGGTATGGGCAACTTCAACTGTTTA
>A01_2489980
AAATATCAGCTGGGTTGTGCAATGAAAATG[T/C]CATGCCAGCTAATTCAAATGCTTTCTTCTC
>A01_2490268
TCTTCGGAAACAAGGATCTTCCAAAGAGCT[A/G]AACAAAGGGCTCGCGTTTGAGCAACCCGTC
>A01_2490378
ACTGCGATTTGCAGCTTCAGCTGCCTCTGG[C/T]GATAGTCTTTTCTTTACCTCCTATAACAGT
>A01_2490946
GAGAAGGTCCTTGTTAAGATTGACATAGTA[T/A]ACAGGAGAGCTATCCCAGCAGATCGCAATT
>A01_2491092
AGAGTTCCAGGAAAGAGTCAAATCCGCCAC[G/A]AATATTTCCTGCAGTTATTGGACCCTTTTC
>A01_2491546
AGACAGGTCATGAACATCCAGACCAAGCGA[T/C]TTAAAGGCAGAGAATGCAGCAGCCCTCGCT
>A01_2491654
CTTGGCTAATCCCAACTGTATCCTTCTCTG[T/A]CCAGTACCTTGTACACCATATCAACTCGAG
>A01_2491869
TTCAAAGAGAGCTTTGACAATTTCAGGGAT[G/A]GATGCTTCTGCTATCGCCTGAGATGTACGC
>A01_2492156
CACAGAACACCGAAACCATGGAACAAAACC[T/G]TCCAGCGTTCTCCTGTAGCGCTTGAACCAT
>A01_2492760
TTCTAAAGGAGACAGTTCCATAAACCGTTC[A/G]TAATACAATTCCCAGTTTGGTTCAACACCA
>A01_2493039
ACGTCCAAGGGGTGTTGTAGTGTATAACTT[T/C]GTCTCTTCATTCCACTCAAGAAATTTTCTG
>A01_2493255
ATTCTTGTCTTCAGATAAACAAGACTCCAA[G/A]GGTGGGCAGCTCTCATTTAGAAGAGTCATT
>A01_2493449
ACTGAAATGTAAATTATAACATCATTATTT[A/C]TAAAGAAATTAAAGGCATACACTTTCTCCT
>A01_2493647
TGTAGCTGTTAAGACACGTACAAGACCCTT[A/C]CGGTAACAGGTCTCAACTATCTCTCTTTCT
>A01_2493705
TCTTCTACCTGAAATACAAATAAATTTGTC[T/C]ATTTAGTGCTAGTACATGAAGATATTCACT
>A01_2494059
TTCACATCCTTTTCGACTTGAGCAAAATAT[T/C]AGCACTGAATTCCCCTCTTGAACAATCTGG
>A01_2494823
AGCACTCATACCCACAATTTGTAGGCCATG[A/G]GCAGGATCATTCTTTCCACTGCTACTCCCT
>A01_2494877
ACTCCCTGAACTCTCACCACTACTTGACTC[T/G]GAACTGCCTTCACCGGCAGCATAACGAAGT
>A01_2494952
TTCCAAAAGATAACCCCTATGTTGGTCACC[A/C]ACCTGTATAAACCATGCGCAACAGGTTCCT
>A01_2495121
CCGTACCATGTGCAGCTCATCTATAACAAT[G/T]ATCCCAAGTTCAGACAAACGACCCTCTTCA
>A01_2496235
ATGTACCTGCCATGGATAGAGTTTAGATAT[T/C]CCTTTCTTATTGTATACGCTGCAAACTTCT
>A01_2497005
ATGATTCTGGTACCTTAGTACACTTCCTCA[A/G]GCCCATTGGAATTTCCACAGATTCATTACT
>A01_2497204
CAACAATTCTAGCAATTGAATCATGCTTAC[T/A]ACCGAGAGGATATGCAGGTTCATCTAGTGA
>A01_2497318
CAAGTAACGATGAACTGCCGCAACGCTTCA[G/A]TTCGTTTGCCTTCTGACGTGTAGGTGAGCC
>A01_2497602
AAGACTCGAGATCCTCCCCGGTTCAAACAC[C/A]CTTCATCTCCTCTAGAACTTTCAGCAATTA
>A01_2497714
AAACCTCCAGATCCAATTTTTTTGCAAACG[C/A]TTTCTGCTTCGCCTGCAACGCACTATTGGA
>A01_2498312
CTTTAAGATGTTGCAGCAAGCGCGAGCTTA[C/G]ACACGAGTAAAACGGAGAAAAAAAAGAGGA
>A01_2498616
TGAGGTATTGTGAAGTTAAAAATTCAATAT[T/G]TTTTTTTGTTTTCGCTCCTATTTTCTGTTT
>A01_2500276
ACATAAAGGAGATTTAGTTAGAAACCTGGT[G/A]TAGAAGTTGGTGGAGAGGTTGATGAAGCTC
>A01_2500590
TTGTAGGTCTCCAGTGAGTGAGAGAGACTT[C/G]TCTTGTTTTTATTGGGTGCAATTTGTAGAA
>A01_2500742
CCCATTAAGCCCATTTACTTGAAACGCGAC[A/C]AACTCTTTTATCGACGTTTGGCGTTTGAAT
>A01_2500830
TTCCGACAGAACTGGTTTCCTGTCCTCGCT[C/T]CGACCGAAGACAAGAAAAATTCAACTGGCA
>A01_2501157
GTGTGTGTTTGCAATTGCATCTTGCTTTTT[G/A]GAATATTGGGTGATGATGTGCTGCTAAAGC
>A01_2501314
TAGTTACAGTGTGGTGTTCACTTCATGTAT[A/G]CTAGTATGATGTGGTTTGTAATATGGTTTA
>A01_2501371
TTTACGGTCGATAACTACATATAGTTATCT[A/T]AAATGTATATCTTGTGAAACAGCTAAAAAT
>A01_2501876
TTTTTGATGATTCTAGTTGTAACATTGCAG[T/C]TTTCACAAGTCGTCAGGAAAACATATCCGA
>A01_2503015
ACTCACTCTCTGTAACTCTGTACACTGTAG[T/G]TGTCAAGAAACATAAAAGCAAGAAACAGAA
>A01_2503073
GAACCATACGTCAAACGACCAATCATAAGC[G/A]TTATATCGATTCTATCATTAAACGTTTTAT
>A01_2503188
AAACACAGAGAGAGAAAGAGAGATACAAGA[G/A]GAGCTTTAATGGAGACAGAAAACAAAGAAG
>A01_2503456
TTCCGGTTTATTCCGACAACGCTCCAGAGA[A/G]ACTTCCATGTCAAGAACTCTTAATGAGCCT
>A01_2503676
CACTTTCATCGTTGTTCTGAGGGTAGTCTA[C/T]GAAGAGCTTGTAAGAACAGAACACGAGTTG
>A01_2503767
CTAAGACATAAGGGTGTTACTAGAGTTCTG[A/C]TTGTGTTATGGAAGTATATGAGGATTCTTT
>A01_2503862
ATTCTTCCATGACATGTTTATGAGAGGACC[T/G]CTTGCACTTGCGTTTGTTCCAAGAAACACA
>A01_2503937
TGGAGCCATAAGGAGGTTTCTTTTCTTCTT[G/T]GATGACAACACTCTTGCTGTAAGTACTCTT
>A01_2504282
ACCTTATTTGATTGGCCAAGCTGTCTTTGT[G/T]CTCCTACGCTGTTTCCCTCCACACGGTTGG
>A01_2504316
CTACGCTGTTTCCCTCCACACGGTTGGGTT[T/C]TGGAAAACATATCTGAGATTACAGTTGGAC
>A01_2504370
GTTGGACACATAGTTCTACTCTCAGTTTGG[T/G]TGGCTTACCTTAAAAGCGTCTTCACTCTGA
>A01_2504404
CTTACCTTAAAAGCGTCTTCACTCTGATTC[G/A]GAATCCAACCAGAACAAGATGGTTTTCACT
>A01_2504911
GTCTTTTTTCCCTCTCAAGTTTGGGTAAGG[T/C]CTTACTCTTACCACACACTGTTTCTAATTT
>A01_2505041
CTCGCTGCTTATATATGCTGCCCCAGGTGG[C/G]TAGCCAACTCTATAAAACAATCTATCAAAC
>A01_2505429
ACCAGTTCTGGTTGGGAGAGCCTTCTTCCA[G/C]TCTATCTCTTTCTACATGCTAAGTTTCGGA
>A01_2505530
ATCTCCATACACCTTTCTTCTTTGTTTTGA[G/A]CTTCTAATGTTAAAACTGCAGATATTTGTG
>A01_2505888
GACGAATCACCTGTGTATAACTTTCTCCAC[C/G]ACTGGTTGATCGGTGTGTACGTCCTTCACA
>A01_2505995
TCATCTCCTTTTCTTGAGTAACAAGTAACC[A/G]CTTTTATATATTTTTTCTTACTCGCAGACT
>A01_2506789
AACGGTACGAATCGTCAAAACGGCCTCTGG[C/G]TCGCTTTTTAATTTATTTTAATTTAAAATA
>A01_2506989
GATCGAGCTCTCCCGGCAGAAGAAAGTGAC[A/C]AAGACGACGACGACGACGACGGAGGAGATT
>A01_2507884
AGGAGGTTTCTTTTCCTTCTTGATGACAAT[G/T]CATTTGCTGTAAGTCCCTGATTCTACACAT
>A01_2508000
TTTAATATCTGCAGGTTCTTGCCATCAGCT[T/G]TTATGTCTCATTCTTCTTCGTTCTTCTTCC
>A01_2508079
TGTCATCCTTCTTTTCCAACGTATGGGGGT[A/G]GCTACGCAGCTTCTTTCAGGAGACGACTCA
>A01_2508143
CCACAAGAACTAGTCGTTATTGGGTATTGG[A/T]CTATGCTGTCACTTTCCTTGGCTTATCTTG
>A01_2508305
AAAGTGTGGAAAAATCTGTATGTGGTTAAA[C/T]TTAAAGAGGGTTTCGTCTTGAGTTTGAAGT
>A01_2508358
TTTGAAGTTTGGAGTGTTGCCTTTGGTGCT[T/C]GGCTGCTGGTTAGATTTTTGCACACTCCCT
>A01_2508585
GATGAGATTGTTAAAATGTATTTTTTCTTT[C/T]GATAGATTTTGCAGAAACGACCCTTTTGGT
>A01_2509555
TAAGTGTCTCATTTTAGATCTTTATGGGTT[C/T]TGGATTGGATGCTATATCCTGCGAGTAACC
>A01_2509622
GGGGCATGCTTCATAATTAACCATATCATG[A/C]TTAGAAGAACCGATTTGCTTCTCAACCTTG
>A01_2509852
ATCATCCCAACACAAGTGCCCCTAAGCGAA[A/C]CCCCGGTTTATTCATTTCTCCGAGATTGGT
>A01_2510323
CGATCTGTTCCATTACATTCATCGTCTGGA[A/G]TACAATGATCGGTATATGGTGGGAGACAGA
>A01_2510400
AAGATCATTCATGAGTAAGGAATCAACTCA[A/G]GACTATGACACTGGACGTTTGTTGCATAGA
>A01_2510437
GACACTGGACGTTTGTTGCATAGACAACTA[A/T]TTTTTCAGTTTTTTCTACGCATCTCTTAGA
>A01_2510717
AAGGAGCTTTAGAATCTAGAAAGAAAAAAC[T/A]TGATACCAAGTAAAAATTCTACAGTTTATG
>A01_2510833
AAATCTCAACCTGCGCTCTTAAAGAAAGGA[T/A]GGTCAAGAGCCTCGTTTGCTGTGAGACGCT
>A01_2510920
TACAACAGATCTGCAAATCCAGATCTTGTG[C/T]TGTCTACATGCCTCGCTACCATCTCCTGCA
>A01_2511081
AAGTCTTTTTACAGCTCTAATACTCTCTCT[A/G]GAGTTGGCCCCTTCCGGCCAATTCAGCCTA
>A01_2511513
CTCCATCCTAGACCTGCAATGATATGCCAC[T/C]AGTTAGTTACCATGAAAAAAATCATGTTCA
>A01_2511868
TATTTAATTACTACATAAATCAAACTTTTT[T/A]TTTTTGGTTTCAAACCAAGCACAACCTTAA
>A01_2511934
ATATATTCTAGATACCTTATTGTCAGGAAG[C/T]TTTACATTTTCTGAAGATACCAATAGAATG
>A01_2512389
TCAGGAAACAAACAAAAGAAATCTAGCCAG[G/A]GAGCCTATGACTAGTCAATAGTCATTCACT
>A01_2512457
ATAACAGGTCACTGAACATATAACCAACAA[T/C]ATCTAGAGTTGCATTTCGATGTCGGAAGAA
>A01_2512554
GATTCCGGTAATCAAACCAGTCCTTCATCT[C/G]TACACATCTGCAACGACAAAGCAGAGATGA
>A01_2513414
CATACGAGGCCGTTTTCTAACTCGTTCCTT[A/G]TCCATCTTCTCGAATTCGTTCACCATCGAT
>A01_2514972
ACACAGAGACGTGAATACAAGTCAAAAGTG[C/T]CGATGAGCCCTTCGGGAAAACAAAGGGTAT
>A01_2515217
TCAACGAAACTCGCTCACCACCTTCTCATA[A/G]TTTAAATAAGGAAAAAAACAAACGATAATA
>A01_2515343
ACGACTTCAGAGGCGAGATCGCCGTTACCT[T/C]TGCTGTTTAGAGGAGGAAGGGCTTCGACGG
>A01_2515622
TACATCATTTCTAACATTAAAACATTATTA[T/C]AAAACAAAGAAAATGAAATATATATATTTA
>A01_2516451
CACACTTTTCAACTACTTCGTGATCAGAGT[C/T]ATTAAGCTTCTTTGCGTAAGTTCCACGTGA
>A01_2516570
AGCTAGTCTCGAACTTGGTTGGCTTTTTAT[C/T]CATCTTTTTTCATAATTTATTTTTAGGTAA
>A01_2516761
TTACTCAATGTACTGGTCCATTGTCACACT[C/T]ACCACCGTGGGTTATGGCGATTTGCATGCG
>A01_2516919
ATGGCGCTCTTCGTACATTCACCATGGTAC[A/G]TTCTTTCATTACAATCATCACCTCTTTCAT
>A01_2517095
ACAATTTGGAGATCATGCGACTTATATATA[G/A]TAGCTCCAACCAAGACTAATGTTTCATCCG
>A01_2517129
CTCCAACCAAGACTAATGTTTCATCCGGAT[G/A]TAACCAAAACCGGCCACGGTTAACAAAGTA
>A01_2517414
AAAGGATTACCTGATGGCCTCATCGTTCAG[A/C]TGGTGATCCATCAACAAGTCCATTTTATTT
>A01_2517517
GTTTTTGTAGGTTTCTAACATAAAAGCAGA[G/A]TATTTCCCGCCTAAAATGGAGATGATATTA
>A01_2517854
AAGTTAGGTCCAGGGGATATGGCAGGAGAG[C/A]TTGGAGTTGTCTTCAACATTCCTCAGCCTT
>A01_2518927
AAGAAGTTCGGGAGACGAGGAAGCACGATT[C/G]TGATGGCAGATGGTGCACATGTTGAACAGC
>A01_2519016
ATATATTTTCTAACTAATATAAATAACAAA[T/C]ATATTACAATTCTCACTTCCCACATACATC
>A01_2519478
CTCCCTAAAACCTTACCCTAAACGTCAATT[T/A]ATATTAGAAAAAAAATACTCTGAAAGGTTA
>A01_2519524
TACTCTGAAAGGTTAAGATGATAACAATGG[C/T]GAAGAAAACAAAATAAAGAAACTAATGGTT
>A01_2519558
GAAAACAAAATAAAGAAACTAATGGTTATT[C/T]TTATAATTTACGCGGCACTGTATATTAAAT
>A01_2519802
TGAAGTGAAACTTCTCATGTAGTAGTCTAT[G/A]CCCTCTCTTCACTTTCAATACTTCTCAAGT
>A01_2519844
CTTTCAATACTTCTCAAGTAGCCAGATCAA[T/A]GTTTTTTTACCGTTCTTCTACGCTTTTCTC
>A01_2519928
AGACTTTTGTAAGGAGTCCTAGAAAACAGA[T/G]GATCAGTTCATCTTGAGCTGGATTTGGCGA
>A01_2520982
TCATACCTTTGCATCAAGGTCGTGGACAGA[A/G]ATCATTCTGGGATAAACCAGTGGGACTGCC
>A01_2521075
CCAGAATGATCGATCATCAATCCTCCCGTC[T/C]GTCCTTAAACCCACACTTTTGGTCAATGCT
>A01_2521823
AACTCTAGAGTAAAAGGAGTTTATACCACA[G/A]GGCACCTCCTTGTAAACTTGCAGCAAAATG
>A01_2521858
CCTCCTTGTAAACTTGCAGCAAAATGCACA[G/C]AGAGTAATGCAGAAATATGTTTTCAATAAT
>A01_2522108
AGTATACAGAGTAATGCATGAAGAGAAGTC[A/T]CTGCCACAAAAATATACCTGGCTGCATCTG
>A01_2522174
CATGACAGCCTCAAAACCCTGCGGCCTAGT[A/T]ATATTCCATTTAAGATCGTTGTAAAGCTTG
>A01_2522292
CAAGGGAAATGTTAAATTATCGCCATGAGA[A/G]ATGCATCAACTAAGCAAGATTTTCGCAGAC
>A01_2522366
ATTACAAAATTGCCACGGAAATATATTGGA[C/G]ATGATTCAAAAGAAAAGTGCATTCGAATTG
>A01_2522698
AGCAGATGGAAACATATTCAGTTAAACATC[C/T]ATCCTACTCGGTATTGGCATACCTGGTATT
>A01_2522852
ATTTTGCAATGAAATACAACAACCTCTTAA[G/A]CAAAGCACGTTTACCTTTTCATTGGCAGAC
>A01_2523069
ATATGATTTTTTAATGTGCATAGATGGATT[G/C]TATGTAACTGGAGGACATGCATCAGTAAAC
>A01_2523376
ATTAATTGCTTTAGGCCATATATTTAACTT[A/T]TATTCTTTTCAGCCACCTCTAAACTAATTG
>A01_2523486
AAATATATCGAGCCTCTACTTGTACTACCA[C/T]CAATTAAAGCAGGTAAAGCACAAGCATCTT
>A01_2523517
CAATTAAAGCAGGTAAAGCACAAGCATCTT[A/C]AGAAATTCCATACCTTAACTGCTGCAGCAA
>A01_2524012
AATATAATATATAGGATTTATCGTGACAAT[G/A]AAGACTCTCAAGTGAAGCAACGGATAGACA
>A01_2524115
CATGTAGTAATTATGATGAGTGATAGTTAT[C/G]ATCCTAAGAGAACAGATGTATTTTTTTCCA
>A01_2524196
AAAGACTAGTGCAACAATTCACCTGCTGCA[G/A]TGCACGTTTCAAATTATAAAAGTGGATTGT
>A01_2524585
ATCAAATATTCAACTACTATAGAATGTTGG[A/G]AACTTACAGGCAGGTCTGAAAGGACTTGCT
>A01_2524704
AATAAGGAAAAAGTACACTGCTGGCATTGG[G/A]TCTCGCACCTATTAGAAAAGATAACAATAT
>A01_2524750
AAAAGATAACAATATTAATTTACATCCATT[A/G]TCTTCGCCCAAAAGGACGTTAATACAATTA
>A01_2526479
GAAATAAATTACATTTAACGTGTTTCCATC[A/G]ATTTACACATTCACAAAAGTTACATAACAA
>A01_2526531
ACATAACAAGAACGTATACCATAAACTTAT[A/G]CTGCCATACCTGTCCTGATGGTGGACCGTA
>A01_2527243
ACCAAAAGGAGGAGGTGGTCTAGGGCCTGA[A/G]CCAGGTGGACGATTCATGCTCAAGTTCTGC
>A01_2527322
TTAGCGTTCCCTTGAGAGCCAGGGAAGTAA[C/T]TTGGTGGCCCGGAGTTTCGCTGGTTGTTGG
>A01_2527360
CCCGGAGTTTCGCTGGTTGTTGGGTCTAAT[T/G]TCCCCTGGAGGCACAGGAGCAGCCATGCTT
>A01_2527467
CCTTCAAAATCTACAAATCCGAAATGATCA[G/A]AATCAGTAACTGCAACAATCAAAGAACTAA
>A01_2527726
AGAGGGAAAGAGAGAGAAGGGCGACGATGG[T/C]TAACGGCGTCGGTGTGAATCACGGATTCAG
>A01_2527993
ATCAATCTTGGTCTCAAACTAACCGGACAT[G/C]TTTGGCTCTTATTTGTGAAATAGCAAAAAA
>A01_2528249
AAATTACGTTTACTAATTATATAATCTATA[C/T]ATCAAAATATTGTTCTTATGAATTTGTGAT
>A01_2528427
TAAATATACATTTGACCAATAAGCAATTAA[T/A]GGATAGTTTTGAAAGAGTATTGTAGCATTC
>A01_2528959
AACCTGGTGCGTAAAAAGGAGACTGAGAGG[C/T]CATCATTAGTCCAAACGAATCTGCAGCCAT
>A01_2529044
TGGAACTGACACAAGAGGCAAGCCTCCTCC[G/T]TGTGTGTATTCCATTGAAGGATACTGAAAA
>A01_2529401
TCCCATGCCATGATGTTGAGCATGAACATC[A/T]TGCGGAGAGGCAAATGAGAAGCCTCCAGAG
>A01_2529656
TCCTTAGGTAGTGTAGATGACTCCACCTGT[G/A]TTAGCACATGAACAAAACATTTAGCATAAT
>A01_2530179
TGGATCCTTCTTTTTCTCAACTTTGACAAT[C/T]TTTTCTACGCGCAAACGAGGATGATTCTCT
>A01_2530569
CTTCTTGCTTTCCTTGTAATCCTCAGTCAC[T/A]GCCTGAGTGGAAACAGAAAAAAAAAAATTG
>A01_2531232
TCCTGCACGGAGTGCACTAACTTCTTCTGC[C/T]GTGAACTTGGCCATTGATATAGATTTCACT
>A01_2531268
CTTGGCCATTGATATAGATTTCACTCGATG[A/T]GTAAACTCTCGACTAGACATATACACAATG
>A01_2531368
TTTCAAGTTCAAATGAGGAAACTCAGAGAA[T/A]AGACTTACTGGATTCCGCTGCAGTTGATGC
>A01_2531654
CAAACTCCTGATAGCCTTTTCAGTTCGCTC[G/A]TCTTCCTTCATCTTGCTCCCCATTGTTGGC
>A01_2531725
CCACTCTTATCAAGAAAATCAATTATCTCA[A/T]ATGAGAAATCCTATCAAAGAGCAATGCCAT
>A01_2532081
TAAAAAGAAGAGAAGAGAGAAACCTTACAG[A/G]AGAAATAAAGATGAAACAGCCAGGGAAAAA
>A01_2532377
TGTTTTGTTCATTTGATTTACCAAACAGAC[A/G]CAAATGATCTACACATTCTTATTTTAGATT
>A01_2532643
CATGATACTCAATTCAAACCTTGTTCCCTA[A/G]CTGATCAAAAAAACTAAACACAGCAACAGT
>A01_2533084
CCATGCCTAGGTCACGTGGAGAATACGTCC[G/C]TGGATGACTCGGAAATTCCTCCGAATGCTC
>A01_2533222
TGAAAGACAAGTCATATAGAGAAGAACCAG[C/T]AGAGTCCATATAGGTTTTTAGAAAAGAAAG
>A01_2533471
ATCTGTGACGACCCATTCGAGTTTGGAGTG[T/C]TTGCTTTGCTCATAACCAACTCCCACTTTT
>A01_2533727
GCATTTCACCCAAGTACATAAATATCTATA[G/T]AGCACCTAGCAATGCAGGTTTTGAAAGAAA
>A01_2534029
CACTATTCTCAGCATCCGAACACTCACGAA[A/T]TCTCGCAAGGCACTGCTCATCATCGCTGTC
>A01_2534378
TGTCGACCCAGGCTGCAGAAATTGATGTGC[C/T]CTGTGTGAGTATTTTGTTGCCCCTGATATT
>A01_2534441
GACGGCAAGTTTCCATTCGTTTTTATCAAA[C/T]GGCTCGAGGAAAATCTGAGCTCCATATTCT
>A01_2535367
ACAAGTGTGTGAGATACACAATAAACGAAA[C/T]AATTTACCAGAACCATGCATTAAACCATCA
>A01_2535621
GAGAAAATTGGCGACTTCAAATCAGCATCC[G/A]CTCCTTGTACTCCTTGCTTATTAGAATGAT
>A01_2535749
CCTTAACCCATCTTGGTTATTCAAGAAAAT[C/T]ATTTCCAAACAAACCCGTGGCCACAAAATC
>A01_2535956
AGGCCCAGAATCTTCGAAAGGCAAAAATTC[A/T]ACATCAGGATCCGGATATTTTGAGACATGT
>A01_2535986
AACATCAGGATCCGGATATTTTGAGACATG[T/G]AGCTGCTCAACACTATTGTCACCTGACCCC
>A01_2536036
CACCTGACCCCTTGTAGATTCCTTTTTTTG[A/C]TGTATGAAGTCGTCTCCTATAATAGACAAG
>A01_2536370
ATCATCTTCTAGCTTTACCTTCTGCTTCTC[G/C]TCGTCTTTACTGGATTTATCATTCCCTTTT
>A01_2536895
CTGAGTGCAGTTCGGATCAAAACGCGAAGA[C/T]AGCATTCTAGCTGCATTAGCTTCAAGATTC
>A01_2537122
CGTTTTCCAACTGCAGCTGAGCTACTGAAT[T/C]AGATTCTTTTATCTCTTTGCCACAGTCCTC
>A01_2537679
ATGAAATACAGCTCGAAACGAAAAAAAAAA[A/C]CCAGAATCAAAATCCCAAGGTCTCAAATGC
>A01_2537811
AAACGAAGAACATACAAGTTTCCCCCAAAA[A/G]AAGAAAAAAAAACCCGATCATGCATTCAAA
>A01_2561229
AGATGATGACTATTTCGCTACCACTGCTCC[G/T]CCCAAGGCCTTGTGGAGTACCTCCGAAGCG
>A01_2561432
TGAAAAGTTTGCATTTTTATGTTCTGTTGT[C/T]GTTGCTTTGATGCTTTGTTGGCAGATTTTG
>A01_2561488
TTTTGAAAAGTCAATTTCTTTCATATGCTG[A/T]GGTGTGTCGTGTGTTGAAACTTGTTTTGAG
>A01_2561883
AGAGAATGAGACGCAAGTTCATCCAGAAGC[A/T]GAGCCTGAGGTGAAGAAGGCTCCTGAAGCT
>A01_2562445
AGAGACGGATGCTGGTGCAAAAGTTGCGGC[A/G]CAAGAAGCAGCAGCGAGGAAGGCAAAGCTG
>A01_2562636
CTTTTAGAGATATGACTTTTGATCTTTTGA[T/A]TTATGTTGAATACAATGTGGGAACATAGAC
>A01_2562667
TTATGTTGAATACAATGTGGGAACATAGAC[A/C]AGATAAAAGCTTTTCTCTTTGAATTTGGTT
>A01_2562708
TTTTCTCTTTGAATTTGGTTTACCCTTTCT[T/C]TCTATCTATTCTTCATGTTCATCTTCGTGC
>A01_2563308
GCCAAGCGACGTTTCAGCTGCGGTGGACTC[T/G]ATGCTGCTCCGTTCCCTAAAGGAACATTAC
>A01_2564424
GCTTTATGTTAAGGATCATCGAAACTTGCT[T/G]CGATGGTTCAAATCAGTTGGCACGTATGTG
>A01_2564878
TCGAAAGAACCTGTCTCTCGTCATATGAAG[G/A]TTCTGTTCGTAATAAATTCAGAGTAAAGTA
>A01_2564990
TCTCCTATATGTTTAGAGGGTTTCAAACTA[C/G]AATCGCAAAAAAAAAGCATTTACACCGTAC
>A01_2565069
CTTCCTTCGCCTTCTTCACAATGAGACTCT[C/G]TGACGAAACACATATTTTGTGTAGGAACAA
>A01_2565130
CAACGCATAAACGCCTTTCGTCTACCGTTT[C/T]GTCCAACATCGAGCAAATGTCAGACATCTA
>A01_2565278
AGAAGAGAGCGAGTTTAAGACCCCCTGGCT[C/G]GTCAAATCAGAGTTCTTCTCCCCAACTTCA
>A01_2565986
[truncated: 30,421,665 more chars]
